# Supplementary material for: An Integrative Study Showing the Adaptation to Sub-Optimal Growth Conditions of Natural Populations of Arabidopsis thaliana: A Focus on Cell Wall Changes
Source: Cells. 2020 Oct 7;9(10):2249. doi: 10.3390/cells9102249 (PMC7601860; doi:10.3390/cells9102249)
Supplement: Supplementary file 1 [file cells-09-02249-s001.zip]

Archive with 5 entries (5 files):
- Duruflé et al._Supplementary Figures_R1.pdf
- Duruflé et al._Supplementary Table S1.xlsx
- Duruflé et al._Supplementary Table S2.xlsx
- Duruflé et al._Supplementary Table S3.xlsx
- Duruflé et al._Supplementary Table S4.xlsx
