# Supplementary material for: An Integrative Study Showing the Adaptation to Sub-Optimal Growth Conditions of Natural Populations of Arabidopsis thaliana: A Focus on Cell Wall Changes
Source: Cells. 2020 Oct 7;9(10):2249. doi: 10.3390/cells9102249 (PMC7601860; doi:10.3390/cells9102249)
Supplement: Supplementary file 1 [file cells-09-02249-s001.zip › Duruflé et al._Supplementary Table S1.xlsx]

## Sheet: Information
Supplementary Table S1. Quantification and statistical analysis of proteomic data
Supplementary Table S1A. Quantification of the CWPs extracted from purified cell walls of A. thaliana rosettes by saline solutions (CaCl2 0.2 M and LiCl 2M) and identified by LC-MS/MS and bioinformatics.
Supplementary Table S1B. Quantification of the CWPs extracted from purified cell walls of A. thaliana floral stems by saline solutions (CaCl2 0.2 M and LiCl 2M) and identified by LC-MS/MS and bioinformatics.

## Sheet: Table S1A
Supplementary Table S1A. Quantification of the CWPs extracted from purified cell walls of A. thaliana rosettes by saline solutions (CaCl2 0.2 M and LiCl 2M) and identified by LC-MS/MS and bioinformatics.
The functional annotation was done according to the presence of predicted functional domains as in ProtAnnDB (www.polebio.lrsv.ups-tlse.fr/ProtAnnDB/).
		higher values
		lower values
		ANOVA (in red if significant, that is lower than 1E-04)
AGI code	Col.22	Col.15	Roch.22	Roch.15	Grip.22	Grip.15	Hern.22	Hern.15	Hosp.22	Hosp.15	ecotype	temperature	interaction	Functional classes	Protein families	(Putative) functions
AT5G59320	7.02672	8.09508	6.70443	8.8849	6.65896	8.64597	6.66856	8.5779	6.72528	8.8844	1	6.1205e-10	1	Proteins related to lipid metabolism	lipid transfer protein (LTP)	non-specific lipid transfer protein (AtLTP1.2, AtLTP3)
AT5G59310	7.19565	7.44288	6.74787	8.76484	6.80065	8.54095	6.44516	8.06479	6.76834	8.84901	1	1.00993e-08	0.170645	Proteins related to lipid metabolism	lipid transfer protein (LTP)	non-specific lipid transfer protein (AtLTP1.11, AtLTP4)
AT5G45890	6.31477	7.51247	6	6.58257	6	6.90343	6	6	6	7.98077	6.72655e-05	3.18448e-08	0.000542655	Proteases	Cys protease	Cys protease (papain family) (Peptidase family C01.117 MEROPS) (SAG12)
AT1G54010	8.08347	7.93516	8.04421	7.59713	8.14374	7.8346	8.31046	7.91424	8.18023	7.69509	0.0396605	4.87498e-08	1	Proteins related to lipid metabolism	GDSL family	lipase acylhydrolase (GDSL family)
AT1G29050	6.78579	7.30165	7.09111	7.67637	6.90012	7.53462	7.20638	7.75757	7.15209	7.67308	0.0354329	1.06903e-07	1	Proteins acting on cell wall polysaccharides		homologous to A. thaliana PMR5 (Powdery Mildew Resistant) (carbohydrate acylation)
AT5G20230	6	6	6	6.55611	6	6	6.05292	6.44834	6	6.75895	0.000105586	3.90854e-07	0.000149614	Oxido-reductases	blue copper binding protein	stellacyanin AtSTC1, BCB (blue copper binding protein)
AT4G37800	8.7682	8.40085	8.90916	8.57211	8.67191	8.30486	8.64371	8.26434	8.63836	8.38333	0.05642	5.54496e-07	1	Proteins acting on cell wall polysaccharides	glycoside hydrolase (GH)	glycoside hydrolase family 16 - GH16 (endoxyloglucan transferase) (At-XTH7)
AT2G23000	6	6.43186	5.92557	6.29573	6	6.37772	6	6.49999	6.03074	6.82542	1	6.17212e-07	1	Proteases	Ser carboxypeptidase	Ser carboxypeptidase (AtSCPL10) (Peptidase family S10.A13, MEROPS)
AT3G53980	7.52022	7.83886	7.67044	8.20183	7.58192	8.05213	7.55352	7.98502	8.00528	8.14556	0.0111126	1.93302e-06	1	Proteins related to lipid metabolism	lipid transfer protein (LTP)	non-specific lipid transfer protein (AtLTPd7)
AT1G21250	6	7.1452	6	6.60645	6	6.73983	6	6.49143	6.31369	7.18159	1	3.50793e-06	1	Signaling		receptor kinase (AtWAK1, WALL-ASSOICATED KINASE 1)
AT1G16850	6.73588	7.42221	6.99118	7.53237	6.83695	7.42388	6.81598	7.54255	7.10692	7.23763	1	6.15065e-06	1	Unknown function		expressed protein
AT1G31690	7.78594	7.69837	8.31012	7.92431	7.97757	7.89983	7.97011	7.70255	8.232	7.62499	0.00360174	1.05459e-05	0.0791838	Oxido-reductases		copper amine oxidase
AT5G15350	8.43944	8.01814	8.33743	7.72209	8.25313	8.09724	8.47922	8.01243	8.3088	7.83953	1	1.35595e-05	1	Oxido-reductases	blue copper binding protein	early nodulin AtEN22 homologous to blue copper binding protein
AT1G42480	7.76523	7.61647	7.54229	7.15805	7.67525	7.41713	7.7319	7.58335	7.84788	7.52164	0.000645122	1.90365e-05	1	Unknown function		expressed protein (DUF3456)
AT1G78860	6.32199	6.81868	6	6.70282	6.61994	6.9829	6.73211	6.95835	6	6.49954	0.000667764	2.47829e-05	1	Proteins with interaction domains (with proteins or polysaccharides)	lectin	lectin (curculin-like)
AT3G18490	8.08111	8.29093	8.03921	8.29302	8.07372	8.27723	8.08427	8.28106	8.23506	8.46201	0.811986	5.76676e-05	1	Proteases	Asp protease	Asp protease (pepsin family) (Peptidase family A01.A09, MEROPS) (ASPG1, ASPARTIC PROTEASE IN GUARD CELL 1)
AT2G45180	8.53414	8.02523	8.6174	8.08008	8.28129	7.97762	8.57936	8.15635	8.46928	8.02809	1	9.43283e-05	1	Proteins related to lipid metabolism	lipid transfer protein (LTP)	homologous to non-specific lipid transfer protein
AT3G10740	7.91671	7.69277	7.81417	7.53013	7.86901	7.42099	7.73994	7.48175	7.77854	7.3098	1	0.000117793	1	Proteins acting on cell wall polysaccharides	glycoside hydrolase (GH)	glycoside hydrolase family 51 - GH51 (alpha-arabinofuranosidase)
AT3G17790	6	6.4838	6	6.35311	6	6.15611	6	6.53506	6	6	1	0.000259466	1	Miscellaneous	purple acid phosphatase (PAP)	purple acid phosphatase (AtPAP17)
AT1G61900	7.62985	7.36049	7.5813	7.03994	7.4511	7.22366	7.71586	7.39541	7.42603	7.27572	1	0.000297612	1	Unknown function		expressed protein
AT3G62110	8.11373	7.81196	8.15175	7.92312	8.12341	7.8424	8.03506	7.81767	8.20542	8.16259	0.118174	0.000322901	1	Proteins acting on cell wall polysaccharides	glycoside hydrolase (GH)	glycoside hydrolase family 28 - GH28 (polygalacturonase)
AT4G19410	8.46098	8.34996	8.4087	8.02548	8.49223	8.30891	8.0114	8.01615	8.52673	8.06145	0.000563529	0.00046015	0.484288	Proteins acting on cell wall polysaccharides	carbohydrate esterase (CE)	carbohydrate esterase family 13 - CE13 (pectin acylesterase - PAE) (AtPAE7)
AT5G05340	6.95411	7.21319	6.21513	7.11749	6.85969	7.12807	6.9776	7.26694	7.0172	7.52825	0.0650968	0.000463966	1	Oxido-reductases	class III peroxidases	peroxidase (AtPrx52)
AT4G34980	7.74186	8.13363	7.97566	8.02046	7.95106	8.13678	7.74753	8.11791	7.50786	8.03535	1	0.000610225	1	Proteases	Ser protease	Ser protease (subtilisin) (AtSBT1.6) (Peptidase family S08.A39, MEROPS)
AT3G19620	7.55797	7.78759	7.76882	8.27041	7.60703	8.13182	7.4922	7.84432	7.92344	8.13618	0.144128	0.000679694	1	Proteins acting on cell wall polysaccharides	glycoside hydrolase (GH)	glycoside hydrolase family 3 - GH3 (beta-xylosidase) (AtBXL5)
AT1G53070	8.23394	8.3592	8.04081	8.49432	8.17659	8.41431	8.1531	8.4051	8.24408	8.49845	1	0.000896698	1	Proteins with interaction domains (with proteins or polysaccharides)	lectin	lectin (legume lectin domain)
AT3G12610	5.95456	6.23956	6.13494	6.58938	6.08728	6.4199	6	6.4392	6.26862	6.5149	1	0.00110067	1	Proteins with interaction domains (with proteins or polysaccharides)	LRR protein	expressed protein (LRR domains)
AT3G18050	7.01352	6.60664	6.80523	6.42017	6.98338	6.44975	6.99168	6.68944	6.972	6.56878	1	0.00158478	1	Unknown function		expressed protein
AT1G49750	8.51107	8.55455	8.53654	8.61277	8.43023	8.46738	8.42654	8.5361	8.60198	8.90717	7.4843e-06	0.00251748	0.466875	Proteins with interaction domains (with proteins or polysaccharides)	LRR protein	expressed protein (LRR domains)
AT1G41830	8.00741	8.27729	8.13635	8.35037	8.02979	8.28384	8.08346	8.35607	7.97858	8.16592	1	0.00294823	1	Oxido-reductases	multicopper oxidase	multicopper oxidase (AtSKS6, homologous to SKU5)
AT1G75040	7.04481	7.72634	7.0558	8.02302	7.0561	7.32471	7.33007	7.51801	7.66039	7.91063	0.873515	0.00327499	1	Miscellaneous	thaumatin	thaumatin (PR5)
AT4G23690	7.13142	7.01655	7.52318	7.12887	7.26232	7.23989	7.4567	7.29654	7.46251	7.22863	0.0156252	0.00352527	1	Miscellaneous	dirigent protein	dirigent protein (AtDIR6)
AT1G33590	9.09229	9.2966	8.98657	9.13854	9.06028	9.24644	9.06792	9.23395	9.09775	9.24203	1	0.00432723	1	Proteins with interaction domains (with proteins or polysaccharides)	LRR protein	expressed protein (LRR domains)
AT5G53370	7.79287	8.09522	7.91308	8.06668	7.86013	8.03599	7.97258	8.09665	8.10241	8.26705	0.254229	0.00490732	1	Proteins acting on cell wall polysaccharides	carbohydrate esterase (CE)	carbohydrate esterase family 8 - CE8 (pectin methylesterase - PME) (AtPME61)
AT3G57240	6.20717	6.93536	6.27158	7.06034	6.59805	6.86593	6.62549	6.8703	6.9947	7.53465	0.353363	0.0055268	1	Proteins acting on cell wall polysaccharides	glycoside hydrolase (GH)	glycoside hydrolase family 17 - GH17 (beta-1,3-glucosidase) (BG3) (PR3)
AT5G44400	6.26951	6.69632	6.47187	6.81297	6.49165	6.96939	6.17513	6.52941	6.58049	6.88559	1	0.0056542	1	Oxido-reductases	berberine-bridge oxido-reductase	berberine-bridge enzyme (S)-reticulin:oxygen oxido-reductase
AT5G49360	7.56668	7.18107	7.94467	7.44998	7.71847	7.60656	7.68218	7.43862	7.33256	7.00551	0.0107637	0.00630524	1	Proteins acting on cell wall polysaccharides	glycoside hydrolase (GH)	glycoside hydrolase family 3 - GH3 (beta xylosidase 1) (AtBXL1)
AT1G78060	8.1476	8.28485	8.10104	8.08106	8.2645	8.27564	8.20868	8.35368	8.14384	8.20168	4.70502e-06	0.00763736	0.254212	Proteins acting on cell wall polysaccharides	glycoside hydrolase (GH)	glycoside hydrolase family 3 - GH3 (beta-xylosidase) (AtBXL7)
AT5G13980	7.46082	7.25261	6.94333	6.63733	7.52266	7.17245	7.44353	7.2455	7.42366	6.84456	0.00752009	0.00908644	1	Proteins acting on cell wall polysaccharides	glycoside hydrolase (GH)	glycoside hydrolase family 38 - GH38 (alpha-mannosidase)
AT2G22970	6.87332	7.05807	6.64697	6.4772	6.16966	6.76151	6	6.78731	6.70055	7.2652	0.0185498	0.0125792	1	Proteases	Ser carboxypeptidase	Ser carboxypeptidase (SCPL11) (Peptidase family S10.A08, MEROPS)
AT1G55120	6.87108	6.65388	6.71251	6.61109	6.8613	6.19091	6.75163	6.46788	6.90436	6.51206	1	0.0141415	1	Proteins acting on cell wall polysaccharides	glycoside hydrolase (GH)	glycoside hydrolase family 32 - GH32 (fructosidase/invertase) (AtcwINV3, FRUCT5)
AT4G12420	8.62819	8.38558	8.66035	8.41309	8.59627	8.41951	8.68539	8.45129	8.58017	8.54487	1	0.0141713	1	Oxido-reductases	multicopper oxidase	multicopper oxidase (AtSKU5, SKEWED 5)
AT2G28470	7.36354	7.37417	7.47546	7.73023	7.42818	7.74655	7.41918	7.73431	7.52446	7.74635	1	0.0144872	1	Proteins acting on cell wall polysaccharides	glycoside hydrolase (GH)	glycoside hydrolase family 35 - GH35 (beta-galactosidase) (AtBGAL8)
AT4G01700	7.76524	7.9487	7.80129	7.94227	7.69149	7.95197	7.67783	7.83957	7.91452	8.28717	0.301291	0.0150504	1	Proteins acting on cell wall polysaccharides	glycoside hydrolase (GH)	glycoside hydrolase family 19 - GH19
AT4G25900	8.41999	8.57527	8.40199	8.60574	8.42571	8.58673	8.38033	8.59419	8.65964	8.7524	0.444461	0.0158364	1	Miscellaneous		aldose-1-epimerase
AT2G45470	8.36881	8.09434	8.32008	8.13462	8.42338	8.1793	8.28773	8.10793	8.39954	8.15302	1	0.0163186	1	Signaling	fasciclin-like arabinogalactan protein (FLA)	fasciclin-like arabinogalactan protein (FLA8)
AT3G17840	6.47955	6.51608	6	6.35243	6	6.40385	6	6	6.32662	6.49954	0.00013497	0.0178514	1	Signaling	LRR-RLK	leucine-rich repeat receptor protein kinase
AT3G45970	7.99983	7.78456	8.04469	7.79449	8.03016	7.98132	8.16946	7.89497	7.82502	7.5919	0.170753	0.0199203	1	Proteins acting on cell wall polysaccharides	expansin	expansin-like A (ATHEXP BETA 2.1) (AtEXLA1)
AT3G62820	7.6466	7.99504	7.58668	7.90062	7.563	7.79275	7.67259	7.96237	7.66752	7.94408	1	0.0227771	1	Proteins with interaction domains (with proteins or polysaccharides)		plant invertase/ pectin methylesterase inhibitor (PMEI)
AT5G08370	7.8639	7.96863	7.42799	7.65287	7.85999	7.82148	7.807	8.08864	8.0526	8.1645	3.11418e-07	0.0274903	1	Proteins acting on cell wall polysaccharides	glycoside hydrolase (GH)	glycoside hydrolase family 27 - GH27 (alpha-galactosidase/melibiase)
AT5G56590	7.64814	7.52863	7.63937	7.23514	7.60232	7.37872	7.66631	7.46478	7.61111	7.55033	1	0.0322122	1	Proteins acting on cell wall polysaccharides	glycoside hydrolase (GH)	glycoside hydrolase family 17 - GH17 (beta-1,3-glucosidase)
AT4G34480	6.85068	6.8195	6.69442	7.06279	6.7088	6.89126	6.40806	6.96397	6.47019	7.36547	1	0.0408094	1	Proteins acting on cell wall polysaccharides	glycoside hydrolase (GH)	glycoside hydrolase family 17 - GH17 (beta-1,3-glucosidase)
AT1G68560	8.75087	8.58637	8.75339	8.66121	8.67122	8.62047	8.67885	8.56549	8.64822	8.41525	1	0.0436024	1	Proteins acting on cell wall polysaccharides	glycoside hydrolase (GH)	glycoside hydrolase family 31 - GH31 (alpha-xylosidase) (XYL1)
AT3G16530	8.76861	8.71976	8.3926	8.39398	8.72219	8.30279	8.66439	8.32302	8.67292	8.52977	0.113866	0.0439899	1	Proteins with interaction domains (with proteins or polysaccharides)	lectin	lectin (legume lectin domain)
AT5G65760	7.3282	7.41039	7.38841	7.45942	7.48024	7.67561	7.3201	7.48962	7.29278	7.38148	0.0354692	0.0479478	1	Proteases	peptidase family S28	Pro-Xaa carboxypeptidase (Peptidase family S28.A02, MEROPS)
AT2G14610	8.08496	8.3569	6.91382	8.1753	7.7296	8.0811	7.75838	7.69653	8.86264	9.18154	6.24651e-06	0.0497641	0.97608	Miscellaneous		pathogenesis-related protein (PR) 1 / Cys-rich secretory protein (SCP)
AT1G71950	7.69689	7.8203	7.539	7.79823	7.72824	7.77889	7.58454	7.7666	7.62297	7.76954	1	0.0565296	1	Proteins with interaction domains (with proteins or polysaccharides)	protease inhibitor	inhibitor family I9 (unassigned peptidase inhibitors, MEROPS)
AT1G03230	8.24484	8.36245	7.95796	7.62807	8.22035	8.08125	8.15113	7.97565	8.10861	7.95231	7.11286e-06	0.0589711	0.913027	Proteases	Asp protease	Asp protease (pepsin family) (Peptidase family A1, subfamily A1B, non-peptidase homologues, MEROPS) (homologous to carrot EDGP and tomato XEGIP)
AT2G06850	8.58132	8.44328	8.49	8.35187	8.5063	8.46688	8.46174	8.4107	8.5161	8.22947	1	0.0641439	1	Proteins acting on cell wall polysaccharides	glycoside hydrolase (GH)	glycoside hydrolase family 16 - GH16 (endoxyloglucan transferase) (At-XTH4)
AT1G15000	7.10992	6.89262	7.22697	6.83655	7.24007	7.00827	7.04495	6.82723	7.13232	6.99432	1	0.0655654	1	Proteases	Ser carboxypeptidase	Ser carboxypeptidase (AtSCPL50) (Peptidase family S10 unassigned peptidases, MEROPS)
AT5G03610	7.22255	7.04186	7.0617	6.80541	7.2091	7.09001	7.17152	7.17546	7.16011	7.06352	0.0996804	0.07809	1	Proteins related to lipid metabolism	GDSL family	lipase acylhydrolase (GDSL family)
AT1G75750	8.32862	8.056	8.14133	7.60325	8.35682	7.99464	8.1605	7.95364	7.85007	7.85934	1	0.0785322	1	Miscellaneous	gibberellic acid-stimulated Arabidopsis (GASA) protein	gibberellic acid-stimulated Arabidopsis (AtGASA1) protein
AT4G24350	7.74466	7.3589	7.85935	7.76268	7.81448	7.80638	7.91539	7.7261	6.43033	6.13943	4.84356e-13	0.0793031	1	Miscellaneous		phosphorylase
AT2G34510	6.96689	6.57205	6.86717	6.59912	6.71184	6.53233	6.88571	6.61397	7.00409	6.62807	1	0.0823965	1	Unknown function		expressed protein (DUF642)
AT1G47960	6.83749	7.08384	6.61268	7.14616	6.83356	7.10764	6.66748	6.85931	6.78545	7.10949	1	0.0852021	1	Proteins with interaction domains (with proteins or polysaccharides)	pectin methyl esterase inhibitor (PMEI)	plant invertase/pectin methylesterase inhibitor (PMEI) (INH)
AT5G06870	8.69007	8.35105	8.45939	8.27936	8.69828	8.36914	8.56359	8.34156	8.58838	8.40529	1	0.0942245	1	Proteins with interaction domains (with proteins or polysaccharides)	LRR protein	PGIP2 (LRR domains)
AT5G43060	7.53371	7.15536	7.2921	7.29768	7.43503	7.40149	7.45377	7.2134	7.65698	7.33532	1	0.117066	1	Proteases	Cys protease	Cys protease (papain family) (Peptidase family C01.A12) (RD21B)
AT3G15356	8.71665	8.61937	8.56436	8.4766	8.79846	8.53871	8.8431	8.75489	8.75321	8.7068	0.0179917	0.130988	1	Proteins with interaction domains (with proteins or polysaccharides)	lectin	lectin (legume lectin domain)
AT3G52720	7.87736	7.78091	7.78293	7.70511	7.81572	7.6796	7.73451	7.68382	7.76793	7.36448	1	0.132168	1	Miscellaneous		carbonic anhydrase
AT2G38530	7.92417	8.50051	7.98395	8.55558	7.88779	8.27486	7.80981	7.88606	7.64085	7.78489	0.483935	0.134252	1	Proteins related to lipid metabolism	lipid transfer protein (LTP)	non-specific lipid transfer protein (AtLTP1.4, AtLTP2)
AT4G12900	6.85307	7.14458	6.55118	6.98404	7.06062	7.30008	7.14521	7.20792	6.86897	6.812	0.00658922	0.160324	1	Oxido-reductases		thiol reductase (GILT family)
AT5G05480	7.18589	7.174	7.08378	7.2269	7.22201	7.40456	6.91059	7.20912	6.99728	7.44828	1	0.162301	1	Proteins acting on cell wall polysaccharides	PNGase A	Peptide-N4-(N-acetyl-beta-glucosaminyl) asparagine amidase A
AT1G17860	7.92342	8.04683	7.74736	7.97684	7.85592	7.94425	7.96205	8.04446	7.99249	8.12041	1	0.163893	1	Proteins with interaction domains (with proteins or polysaccharides)	protease inhibitor	inhibitor family I3 (Kunitz trypsin inibitor family) (subfamily I03.030, MEROPS)
AT5G08260	7.50304	7.7531	7.5908	7.89164	7.65111	7.77013	7.35463	7.79916	7.50236	7.71792	1	0.166836	1	Proteases	Ser carboxypeptidase	Ser carboxypeptidase (AtSCPL35) (Peptidase family, S10.A34, MEROPS)
AT3G61820	7.68046	7.99889	7.75941	7.89836	7.76426	7.95575	7.69482	8.03954	7.65038	7.98661	1	0.172998	1	Proteases	Asp protease	Asp protease (pepsin family) (Peptidase family A01.A13, MEROPS)
AT5G25460	9.0111	8.45345	9.08107	8.45383	8.86738	8.77937	8.97104	8.85408	8.75988	8.66528	1	0.20211	1	Unknown function		expressed protein (DUF642)
AT2G35780	7.07965	7.07622	7.05994	6.65584	6.78958	6.91959	6.96266	6.80089	6.77438	6.41844	0.00222418	0.202557	0.436199	Proteases	Ser carboxypeptidase	Ser carboxypeptidase (AtSCPL26) (Peptidase family S10.A43, MEROPS)
AT2G43530	7.36301	7.46212	7.39948	7.75641	7.40221	7.62469	7.59835	7.54009	7.61808	8.07663	0.346057	0.253736	1	Miscellaneous		expressed protein (scorpion toxin-like domain, defensin)
AT5G07830	7.47119	7.57355	7.60465	7.61802	7.54192	7.74245	7.55975	7.74051	7.49169	7.69625	1	0.269801	1	Proteins acting on cell wall polysaccharides	glycoside hydrolase (GH)	glycoside hydrolase family 79 - GH79 (endo-beta-glucuronidase/heparanase)
AT1G33811	6.94853	6.88913	6.82784	6.60345	7.12649	6.91775	7.23372	6.83855	6.82354	6.06727	0.327012	0.275403	1	Proteins related to lipid metabolism	GDSL family	lipase acylhydrolase (GDSL family)
AT5G38940	6	6	6.53718	6.55425	6.3988	6.46219	6	6.49143	6.43033	6.49954	2.32112e-06	0.277539	0.177359	Miscellaneous		germin (subfamily 1 member 11)
AT5G60360	6.87753	7.36754	7.0657	7.34129	7.05758	7.24212	6.81275	7.32995	6.97716	7.48633	1	0.289392	1	Proteases	Cys protease	Cys protease (papain family) (Peptidase family C01.163 MEROPS)
AT1G55265	6	6.46108	6.26489	6.63701	6.27127	6.67648	6.6092	6.79634	6.65615	6.83316	1	0.326527	1	Unknown function		expressed protein (DUF538)
AT4G36195	8.15447	8.25746	8.20912	8.29257	8.07521	8.22907	8.08125	8.22174	8.17162	8.36537	1	0.339396	1	Proteases	peptidase family S28	Pro-Xaa carboxypeptidase (Peptidase family S28.A26, MEROPS)
AT4G11290	7.79036	7.64665	7.5921	7.73188	7.73611	7.84093	7.44774	7.53722	7.27353	7.83244	0.232674	0.357466	0.121211	Oxido-reductases	class III peroxidases	peroxidase (AtPrx39)
AT5G18470	7.39359	7.77083	7.3378	7.76339	7.26019	7.57847	7.54638	7.58269	7.3765	7.91384	1	0.375256	1	Proteins with interaction domains (with proteins or polysaccharides)	lectin	lectin (curculin-like)
AT1G01300	7.43462	7.88715	7.60268	7.70195	7.57558	7.76676	7.50374	7.6516	7.53156	7.74292	1	0.455701	1	Proteases	Asp protease	Asp protease (pepsin family) (Peptidase family A01.A05, MEROPS)
AT1G13750	7.31051	7.73492	7.45266	7.612	7.29987	7.33717	7.01812	7.15931	7.43534	7.76827	0.0384721	0.457612	1	Miscellaneous	purple acid phosphatase (PAP)	purple acid phosphatase (AtPAP1)
AT5G67360	7.67442	7.83041	7.75591	7.93842	7.6693	7.85806	7.72561	7.85891	7.74574	7.81842	1	0.51107	1	Proteases	Ser protease	Ser protease (subtilisin) (AtSBT1.7, ARA12) (Peptidase family S08.112, MEROPS)
AT2G10940	8.7521	8.44465	8.95676	8.58838	8.82651	8.83727	9.04447	8.88494	8.59399	8.18769	0.0985705	0.529921	1	Proteins related to lipid metabolism	lipid transfer protein (LTP)	homologous to non-specific lipid transfer protein
AT4G30610	7.83209	7.62349	7.75075	7.68661	7.76543	7.74559	7.88174	7.79265	7.84346	7.52632	1	0.532695	1	Proteases	Ser carboxypeptidase	Ser carboxypeptidase (AtSCPL24, BRS1, Brassinosteroid-Insensitive BRI suppressor 1) (Peptidase family S10.015, MEROPS)
AT3G07320	7.83452	8.07475	7.96705	8.14894	7.90601	8.04127	8.01493	8.20657	7.89849	7.97287	1	0.570392	1	Proteins acting on cell wall polysaccharides	glycoside hydrolase (GH)	glycoside hydrolase family 17 - GH17 (beta-1,3-glucosidase)
AT5G12940	8.03575	8.25253	8.19086	8.21077	7.89521	8.13665	8.01844	8.2285	8.37322	8.37679	0.0807347	0.722485	1	Proteins with interaction domains (with proteins or polysaccharides)	LRR protein	expressed protein (LRR domains)
AT1G65590	8.29863	8.22551	8.27588	8.15043	8.17043	8.10589	8.33338	8.24834	8.23425	7.97724	1	0.742899	1	Proteins acting on cell wall polysaccharides	glycoside hydrolase (GH)	glycoside hydrolase family 20 - GH20 (N-acetyl-beta-glucosaminidase)
AT3G13790	7.55732	7.47974	7.68856	7.45776	7.64345	7.50078	7.72167	7.5787	7.90882	7.57696	1	0.884437	1	Proteins acting on cell wall polysaccharides	glycoside hydrolase (GH)	glycoside hydrolase family 32 - GH32 (fructosidase/invertase) (AtcwINV1)
AT3G57260	6.67534	6.7262	6.51625	7.21047	6.52555	6.68389	6.57138	6.51697	6.51285	6.87138	1	0.8992	1	Proteins acting on cell wall polysaccharides	glycoside hydrolase (GH)	glycoside hydrolase family 17 - GH17 (beta-1,3-glucosidase) (BG2) (PR2)
AT1G24450	7.00394	7.0691	6.88497	7.09777	7.07414	6.95039	6	6	6.95296	6.88023	7.40524e-11	1	1	Miscellaneous		ribonuclease III
AT5G03350	8.46409	8.81767	8.59221	8.83652	8.56342	8.79075	6.38842	6.48583	7.55797	7.87552	3.46e-10	1	1	Proteins with interaction domains (with proteins or polysaccharides)	lectin	lectin (legume lectin domain)
AT1G14210	7.46134	7.21257	7.5144	7.2979	7.48225	7.28303	7.53714	7.46965	6.24383	6	6.10149e-09	1	1	Miscellaneous		ribonuclease T2
AT1G53830	6.11485	6	6.9811	7.1305	6.04533	6	7.24975	6.95867	7.07999	7.12803	1.92508e-08	1	1	Proteins acting on cell wall polysaccharides	carbohydrate esterase (CE)	carbohydrate esterase family 8 - CE8 (pectin methylesterase - PME) (AtPME2)
AT1G78450	6	6	7.53127	6.90139	6	6	6	6	6	6.24226	4.09563e-08	1	1	Unknown function		expressed protein (SOUL heme-binding domain)
AT1G58270	7.03573	7.5021	6	6	6.68303	6	6	6	6	6	1.8636e-06	1	1	Unknown function		expressed protein (MATH domain)
AT4G21650	7.417	7.71133	7.97839	8.15783	6.92255	6	6.14154	6.11369	7.84404	7.91597	5.63671e-06	1	1	Proteases	Ser protease	Ser protease (subtilisin) (AtSBT3.13) (Peptidase family S08.A48, MEROPS)
AT5G26000	9.30792	9.36702	9.43089	9.36526	9.34012	9.36449	8.89741	9.00674	8.89134	8.8937	7.55911e-06	1	1	Proteins acting on cell wall polysaccharides	glycoside hydrolase (GH)	glycoside hydrolase family 1 - GH1 (thioglucoside hydrolase 1) (TGG1) (AtBGLU38)
AT1G78680	7.80866	7.75377	6.96859	7.03119	7.71991	7.55493	7.73121	7.70662	7.60462	7.6318	2.56697e-05	1	1	Proteases	peptidase C26	peptidase C26 (peptidase family C26.003, MEROPS)(GGH2)
AT5G19100	7.01131	6.18898	7.72453	7.72474	7.35383	7.76077	6	6.17581	7.65236	7.62278	4.21232e-05	1	1	Proteases	Asp protease	Asp protease (pepsin family) (Peptidase family A1, subfamily A1B, non peptidase homologues, MEROPS) (homologous to carrot EDGP and tomato XEGIP)
AT2G47010	6.65128	6.51505	6.61705	6.60278	6.63318	6.64616	6.01225	6.05909	7.07911	7.28136	4.45429e-05	1	1	Unknown function		expressed protein
AT3G21770	7.91636	7.92777	7.43275	7.53506	7.82796	7.88063	7.62983	7.79876	7.51436	7.5993	7.61334e-05	1	1	Oxido-reductases	class III peroxidases	peroxidase (AtPrx30) (ATP7a)
AT3G14210	9.10038	9.63653	8.44457	8.21515	8.72373	8.34082	8.06834	8.12659	8.12002	7.70591	0.000111631	1	1	Proteins related to lipid metabolism	GDSL family	lipase acylhydrolase (GDSL family)
AT5G60950	6.78686	6.23718	7.41211	7.48825	7.11964	7.50974	7.52083	7.57387	7.829	8.05731	0.000152463	1	1	Signaling	COBRA-like	COBRA-like (AtCOBL5)
AT2G05920	8.18085	8.23984	8.15195	8.22221	8.18697	8.25013	8.19448	8.27755	7.94797	7.96934	0.000172566	1	1	Proteases	Ser protease	Ser protease (subtilisin) (AtSBT1.8, AF70) (Peptidase family S08.A24, MEROPS)
AT5G38980	7.04577	7.49831	6.08331	6	6.9156	6	7.81479	7.79303	8.24268	8.50361	0.00025379	1	1	Unknown function		expressed protein
AT2G43590	6.91199	7.32474	6	6.10372	6.66368	6	6	6.41977	6	6.83956	0.000517825	1	0.105129	Proteins acting on cell wall polysaccharides	glycoside hydrolase (GH)	glycoside hydrolase family 19 - GH19
AT5G63800	7.86106	7.79739	7.78584	7.55082	7.98365	8.03983	8.11617	8.17412	7.8362	7.78788	0.000614809	1	1	Proteins acting on cell wall polysaccharides	glycoside hydrolase (GH)	glycoside hydrolase family 35 - GH35 (beta-galactosidase) (AtBGAL6)
AT4G23820	7.54394	7.56727	7.83834	7.74985	7.55835	7.66605	7.55147	7.46654	7.39822	7.44352	0.000637471	1	1	Proteins acting on cell wall polysaccharides	glycoside hydrolase (GH)	glycoside hydrolase family 28 - GH28 (polygalacturonase)
AT1G52400	8.49699	8.63446	8.22751	8.15399	8.39978	8.29409	8.28224	8.26923	8.38244	8.21123	0.000743753	1	1	Proteins acting on cell wall polysaccharides	glycoside hydrolase (GH)	glycoside hydrolase family 1 - GH1 (beta-glucosidase)(AtBG1) (AtBGLU18)
AT1G78820	8.03653	8.24999	8.32278	8.42998	7.81638	7.878	7.50081	7.69525	8.55414	8.70866	0.00109023	1	1	Proteins with interaction domains (with proteins or polysaccharides)	lectin	lectin (curculin-like)
AT1G31710	6.95962	6	8.27023	8.09385	7.50202	7.78895	7.93154	7.64795	7.75555	7.69904	0.00146104	1	1	Oxido-reductases		copper amine oxidase
AT1G78850	8.8311	8.76291	8.50401	8.61753	8.63371	8.7428	8.69256	8.72007	8.85789	8.93598	0.00151155	1	1	Proteins with interaction domains (with proteins or polysaccharides)	lectin	lectin (curculin-like)
AT3G55430	7.19359	7.2813	7.19575	7.05182	7.38197	7.31959	7.18916	7.266	6.84771	6.60696	0.00179149	1	1	Proteins acting on cell wall polysaccharides	glycoside hydrolase (GH)	glycoside hydrolase family 17 - GH17 (beta-1,3-glucosidase)
AT5G21105	7.76836	7.65727	7.7957	7.77524	7.65601	7.76194	7.90483	7.84864	7.82692	7.9695	0.00460696	1	1	Oxido-reductases	multicopper oxidase	multicopper oxidase
AT3G52500	8.26227	8.26522	8.09637	8.26505	8.17283	8.25848	8.3281	8.42209	7.90012	7.8961	0.00470165	1	1	Proteases	Asp protease	Asp protease (pepsin family) (Peptidase family A01.A47, MEROPS)
AT3G04720	7.27935	7.10687	6.95675	6.93292	7.18833	6.83308	7.4024	6.99335	7.44152	7.55837	0.00896225	1	1	Proteins with interaction domains (with proteins or polysaccharides)		expressed protein (Barwin domain, defense protein)
AT5G09760	7.25567	7.05265	7.42225	7.40201	7.54947	7.40758	7.14872	7.09311	7.6463	7.38835	0.00898874	1	1	Proteins acting on cell wall polysaccharides	carbohydrate esterase (CE)	carbohydrate esterase family 8 - CE8 (pectin methylesterase - PME) (AtPME51)
AT2G18660	6.8127	7.16743	6.53718	6.69252	6.77035	6.64176	7.33755	6.94055	6.92075	8.02511	0.0149095	1	0.163634	Proteins acting on cell wall polysaccharides	expansin	homologous to expansin (EXR3)
AT1G12570	7.11268	7.55201	7.33143	7.72431	6.85244	6.92064	7.05346	7.1548	6.54423	6.94636	0.0207379	1	1	Oxido-reductases		expressed protein (GMC oxido-reductase domain)
AT4G22010	7.44825	7.40684	7.62675	7.45792	7.67398	7.64313	7.5836	7.66051	7.38716	7.2455	0.0231076	1	1	Oxido-reductases	multicopper oxidase	multicopper oxidase (AtSKS4, homologous to SKU5)
AT3G10450	6.60848	6	6.64824	6.66216	6.70695	6.81655	6.48608	6.51304	6.82483	6.88231	0.0288589	1	1	Proteases	Ser carboxypeptidase	Ser carboxypeptidase (AtSCPL7) (Peptidase family S10.A15, MEROPS)
AT3G28220	6.85129	7.60879	6.44239	6.57443	6.48306	6.53248	6.83877	6.93002	7.23323	7.15828	0.0308234	1	1	Unknown function		expressed protein (MATH domain)
AT1G35140	7.32702	7.13831	6.82179	6.49253	7.26981	7.19288	7.33575	7.18376	7.19537	6.85891	0.0396652	1	1	Miscellaneous		phosphate-induced (phi) protein 1
AT5G19110	7.39463	7.2431	7.46984	7.09505	7.37845	7.4231	6.59271	6.32334	7.35126	6.88719	0.0409025	1	1	Proteases	Asp protease	Asp protease (pepsin family) (Peptidase family A1, subfamily A1B, non-peptidase homologues, MEROPS) (homologous to carrot EDGP and tomato XEGIP)
AT1G74000	6.76642	6.39871	7.10208	7.06104	6.81189	6.97876	7.135	7.02671	6.80595	6.34977	0.061713	1	1	Miscellaneous		strictosidine synthase
AT4G29240	6.63263	6.77665	6.75145	6.6157	6.45896	6.4944	6.87867	7.00831	6.97399	7.1575	0.0886521	1	1	Proteins with interaction domains (with proteins or polysaccharides)	LRR protein	expressed protein (LRR domains)
AT1G66970	7.67387	7.70596	7.39323	7.53345	7.50447	7.70939	7.5725	7.73132	7.78208	8.1095	0.101924	1	1	Proteins related to lipid metabolism		glycerophosphoryl diester phosphodiesterase (GDPDL1, GDPL3)
AT1G54030	7.19974	7.47187	6.83655	6.51975	6.8921	6.76681	6.77993	6.73508	6.86559	6.40172	0.107495	1	1	Proteins related to lipid metabolism	GDSL family	lipase acylhydrolase (GDSL family)
AT1G52410	6.44336	6.64372	6	6	6.24622	6.47582	6	6.13754	6.04597	6.53253	0.120341	1	1	Unknown function		expressed protein
AT2G45220	7.23339	7.81494	6.7776	7.27329	7.28315	6.74682	7.40191	6.90105	6.88505	7.24053	0.122496	1	0.00395901	Proteins acting on cell wall polysaccharides	carbohydrate esterase (CE)	carbohydrate esterase family 8 - CE8 (pectin methylesterase - PME) (AtPME17)
AT3G43670	6.27087	6.43186	6.37844	6.49758	6.71039	6.83399	6.96473	7.09387	6.73158	6.26857	0.125903	1	1	Oxido-reductases		copper amine oxidase
AT5G48540	8.08673	8.2706	8.08845	7.99862	8.08311	8.06879	8.24675	8.21413	8.29556	8.57896	0.128245	1	1	Unknown function		expressed protein (Gnk2-homologous domain, antifungal protein of Ginkgo seeds)
AT1G28290	8.75416	8.63762	8.75876	8.77137	8.58957	8.77204	8.32753	8.57428	8.51463	8.68309	0.132913	1	1	Structural proteins	proline-rich protein (PRP)	AGP/proline-rich protein (AtAGP31)
AT5G64110	6.62495	6.75596	7.11729	7.15446	6.88247	7.10718	6.46072	6.94751	7.12002	6.98356	0.139146	1	1	Oxido-reductases	class III peroxidases	peroxidase (AtPrx70)
AT3G52840	7.01808	7.00309	7.08752	6.97109	7.15377	7.06359	7.01781	7.25256	6.99143	6.50518	0.18624	1	1	Proteins acting on cell wall polysaccharides	glycoside hydrolase (GH)	glycoside hydrolase family 35 - GH35 (beta-galactosidase) (AtBGAL2)
AT2G04160	6.99721	7.18845	7.07017	7.08195	7.00672	7.06544	6.03803	6.78248	7.00347	6.64293	0.2339	1	1	Proteases	Ser protease	Ser protease (subtilisin) (AtSBT5.3, AIR3) (Peptidase family S08.119, MEROPS)
AT5G19240	7.08989	6.87154	6.97856	7.4453	6.98388	6.93952	7.50951	7.46827	7.47075	7.91994	0.258047	1	1	Unknown function		expressed protein
AT5G42720	6.50967	6.49448	6.73801	6.79007	6.51848	6.53386	6.60499	6.75227	6	6.6813	0.287177	1	1	Proteins acting on cell wall polysaccharides	glycoside hydrolase (GH)	glycoside hydrolase family 17 - GH17 (beta-1,3-glucosidase)
AT5G21100	7.4397	7.40048	7.53099	7.35148	7.45744	7.39822	7.1446	7.17089	7.37357	7.24025	0.312949	1	1	Oxido-reductases	multicopper oxidase	multicopper oxidase
AT4G30270	7.79873	7.74711	8.07147	7.9191	7.72835	7.93876	7.92735	7.93498	7.99051	8.17314	0.314042	1	1	Proteins acting on cell wall polysaccharides	glycoside hydrolase (GH)	glycoside hydrolase family 16 - GH16 (endoxyloglucan transferase) (meri-5) (At-XTH24)
AT1G55210	7.7816	7.9631	7.44637	7.44204	7.86111	7.76291	7.59189	7.70821	7.85041	7.81716	0.32675	1	1	Miscellaneous	dirigent protein	dirigent protein (AtDIR20)
AT2G17120	7.9108	8.01679	7.85217	7.96508	7.94515	8.014	7.80923	7.85981	8.21279	8.41876	0.406409	1	1	Proteins with interaction domains (with proteins or polysaccharides)		expressed protein (LysM domain)
AT5G14450	6.83502	7.11768	6.7524	7.01497	6.8833	6.98228	7.26696	7.3687	6.50708	6.98137	0.501422	1	1	Proteins related to lipid metabolism	GDSL family	lipase acylhydrolase (GDSL family)
AT2G26010	6.96779	7.18657	6	6.71288	6.78984	6	7.4498	6.25132	6	7.09931	0.522053	1	0.00143815	Miscellaneous		homologous to gamma thionin (defensin)
AT2G39850	8.07103	8.15832	8.31251	8.0267	7.74474	7.69537	8.13079	8.11754	7.73761	7.85359	0.593521	1	1	Proteases	Ser protease	Ser protease (subtilisin) (AtSBT4.1) (Peptidase family S08.A46, MEROPS)
AT3G14920	7.51428	7.46258	7.49456	7.45235	7.48624	7.43923	7.61219	7.56398	7.57354	7.7549	0.59696	1	1	Proteins acting on cell wall polysaccharides	PNGase A	Peptide-N4-(N-acetyl-beta-glucosaminyl) asparagine amidase A
AT4G38770	7.53652	7.31611	7.6364	7.61113	7.43083	7.65005	7.83487	7.81783	7.67142	7.68873	0.644011	1	1	Structural proteins	proline-rich protein (PRP)	proline-rich protein (AtPRP4)
AT2G04690	7.94599	7.88154	7.95142	7.6924	7.9134	7.78115	7.76232	7.44558	8.03313	8.16092	0.648882	1	1	Unknown function		expressed protein (human brain CREG protein domain)
AT5G42240	8.02295	7.89974	8.06691	8.16212	7.83367	8.14235	8.09439	8.25579	7.94112	7.97311	0.65832	1	1	Proteases	Ser carboxypeptidase	Ser carboxypeptidase (AtSCPL42) (Peptidase family S10.A21, MEROPS)
AT3G56310	6.83936	6.84981	6.79016	6.97854	6.67868	6.85962	6.66531	6.69054	6.93287	7.30961	0.789107	1	1	Proteins acting on cell wall polysaccharides	glycoside hydrolase (GH)	glycoside hydrolase family 27 - GH27 (alpha-galactosidase/melibiase)
AT1G28600	7.66379	7.68907	7.56629	7.58304	7.58159	7.61157	7.52523	7.468	7.7668	7.66421	0.815054	1	1	Proteins related to lipid metabolism	GDSL family	lipase acylhydrolase (GDSL family)
AT4G12390	6.51103	6.54982	6.7463	6.64817	6.88648	6.63678	7.26028	7.11156	7.03064	6.76732	0.940235	1	1	Proteins with interaction domains (with proteins or polysaccharides)	pectin methyl esterase inhibitor (PMEI)	plant invertase/pectin methylesterase inhibitor (PMEI-like)
AT5G20740	6.83127	6.81939	6.98276	7.03218	6.62391	6.46219	6.46574	6.49143	6.43033	6.49954	0.968855	1	1	Proteins with interaction domains (with proteins or polysaccharides)	pectin methyl esterase inhibitor (PMEI)	plant invertase/pectin methylesterase inhibitor (PMEI) (AtPMEI3)
AT2G20750	6.48544	6.49915	6.5733	6.89542	6.29874	6.5307	6.61696	7.16279	6.77746	6.65078	0.985896	1	1	Proteins acting on cell wall polysaccharides	expansin	beta-expansin (AtEXPB1)
AT1G01900	7.10439	7.25132	6.96222	7.06211	7.02528	7.14093	7.16601	7.19099	6.96046	7.00614	1	1	1	Proteases	Ser protease	Ser protease (subtilisin) (AtSBT1.1) (Peptidase family S08.112, MEROPS)
AT1G02305	7.28344	7.53263	7.29955	7.31181	7.28258	7.4389	7.21687	7.32333	7.20161	7.14499	1	1	1	Proteases	Cys protease	Cys protease (cathepsin B family) (Peptidase family C01.049, MEROPS)
AT1G02335	6.64779	6.64229	6.65096	6.95099	6.44178	6.55017	6.41412	6.64812	6.41225	6.50288	1	1	1	Miscellaneous		germin (subfamily 2 member 2)
AT1G02360	6.99519	6.99476	6.72912	6.93368	7.12701	6.96965	6.87629	6.95563	7.2678	7.5415	1	1	1	Proteins acting on cell wall polysaccharides	glycoside hydrolase (GH)	glycoside hydrolase family 19 - GH19
AT1G03220	8.20274	8.24224	8.15546	8.11908	8.08513	7.98499	8.26817	8.15891	8.37256	8.22637	1	1	1	Proteases	Asp protease	Asp protease (pepsin family) (Peptidase family A1, subfamily A1B, non-peptidase homologues, MEROPS) (homologous to carrot EDGP and tomato XEGIP)
AT1G04680	7.53246	7.80496	7.48647	7.306	7.66417	7.48883	7.50988	7.62043	7.46873	7.84787	1	1	1	Proteins acting on cell wall polysaccharides	polysaccharide lyase (PL)	polysaccharide lyase family 1 - PL1 (pectate lyase) (AtPLL26)
AT1G05835	7.08244	7.41219	7.68859	7.19644	7.03268	7.09879	7.13847	7.45476	6.71395	7.22235	1	1	1	Unknown function		expressed protein
AT1G07080	6.96849	6.12745	6.50369	6.22632	6.39011	6.39494	6.47343	6.46183	6.74798	6.29237	1	1	1	Oxido-reductases		thiol reductase (GILT family)
AT1G09010	7.65967	7.688	7.75362	7.57576	7.67183	7.73185	7.69825	7.67472	7.61548	7.51471	1	1	1	Proteins acting on cell wall polysaccharides	glycoside hydrolase (GH)	glycoside hydrolase family 2 - GH2
AT1G09750	9.0111	9.00721	8.81822	8.80056	9.02343	8.98042	8.96724	8.97094	8.88659	8.89287	1	1	1	Proteases	Asp protease	Asp protease (pepsin family) (Peptidase family A01.A36, MEROPS)
AT1G11580	8.43359	8.45585	8.4593	8.37313	8.45772	8.47681	8.51311	8.36554	8.74012	8.44115	1	1	1	Proteins acting on cell wall polysaccharides	carbohydrate esterase (CE)	carbohydrate esterase family 8 - CE8 (pectin methylesterase - PME) (AtPME18)
AT1G13900	7.10802	6.75467	7.08578	6.77394	7.01278	6.99235	6.79059	7.01533	7.07636	7.0888	1	1	1	Miscellaneous	purple acid phosphatase (PAP)	purple acid phosphatase (AtPAP2)
AT1G17100	7.66935	7.80504	7.74825	7.70351	7.6202	7.70253	7.75969	7.76385	7.74827	7.74736	1	1	1	Unknown function		expressed protein (SOUL heme-binding domain)
AT1G18250	7.42393	7.46329	6.94336	7.38209	7.38166	7.38233	7.34382	7.4749	7.39251	7.22241	1	1	1	Miscellaneous	thaumatin	thaumatin (PR5, ATLP1)
AT1G20190	8.36961	8.36001	8.50175	8.45028	8.34396	8.42963	8.19308	8.31057	8.33145	8.32737	1	1	1	Proteins acting on cell wall polysaccharides	expansin	alpha-expansin (ATHEXP ALPHA 1.14) (AtEXPA11)
AT1G20225	6.55475	6.60711	6.53541	6.66052	6.57152	6.80693	6.46574	6.56725	6.44156	6.57601	1	1	1	Oxido-reductases		expressed protein (thioredoxin fold)
AT1G20850	7.57615	7.23649	7.65038	7.63949	7.64028	7.62424	7.67303	7.62679	7.52866	7.26291	1	1	1	Proteases	Cys protease	Cys protease (cathepsin family) (XCP2, XYLEM CYSTEINE PEPTIDASE 2) (Peptidase family C01.121, MEROPS)
AT1G21670	7.78655	7.95377	8.02068	8.08264	7.98303	7.99266	7.98702	8.1935	7.93846	7.91253	1	1	1	Unknown function		expressed protein (WD40-like beta propeller domain)
AT1G26820	6.70119	6.41911	6.54561	6.42561	6.41759	6.5991	6.3389	6.71272	6.55977	6.62158	1	1	1	Miscellaneous		ribonuclease T2
AT1G27950	7.19563	7.07455	7.00219	7.11445	7.08247	7.12965	6.9161	7.21547	7.11939	7.253	1	1	1	Proteins related to lipid metabolism	lipid transfer protein (LTP)	non-specific lipid transfer protein (AtLTPg4, LTPG1)
AT1G28110	6.92023	6.94796	6.72483	6.88604	6.78868	6.80538	6.81962	6.76662	6.94411	7.08305	1	1	1	Proteases	Ser carboxypeptidase	Ser carboxypeptidase (AtSCPL45) (Peptidase family S10.A24, MEROPS)
AT1G29660	7.0705	7.33135	7.47663	7.31583	7.16666	7.14289	7.12747	7.31721	7.17099	7.26538	1	1	1	Proteins related to lipid metabolism	GDSL family	lipase acylhydrolase (GDSL family)
AT1G29670	8.7802	8.91253	8.90847	8.93095	8.86606	8.97443	8.87327	8.94139	8.95486	9.05893	1	1	1	Proteins related to lipid metabolism	GDSL family	lipase acylhydrolase (GDSL family)
AT1G33600	7.64436	7.96123	7.7921	7.79264	7.74274	7.71939	7.94462	7.89472	7.76748	7.90411	1	1	1	Proteins with interaction domains (with proteins or polysaccharides)	LRR protein	expressed protein (LRR domains)
AT1G33610	7.63061	7.69822	7.70141	7.71599	7.62097	7.74081	7.34381	7.58173	7.72315	7.64233	1	1	1	Proteins with interaction domains (with proteins or polysaccharides)	LRR protein	expressed protein (LRR domains)
AT1G47128	7.99345	7.75634	7.80604	7.9704	7.83488	7.85727	7.98605	7.82404	8.20341	8.02962	1	1	1	Proteases	Cys protease	Cys protease (papain family) (Peptidase family C01.064) (RD21A)
AT1G48750	6.71903	6.4497	7.13451	7.11045	6.92448	6.46219	6.61092	6.60674	7.03554	6.85712	1	1	1	Proteins related to lipid metabolism	lipid transfer protein (LTP)	non-specific lipid-transfer protein (AtLTP2.4)
AT1G49740	7.06118	7.136	7.01576	6.83403	7.08326	7.20899	6.57474	6.8509	7.25054	7.21814	1	1	1	Proteins related to lipid metabolism		expressed protein (phospholipase C, phosphatidylinositol-specific, X domain)
AT1G54000	6.87229	7.09026	6.62249	6.59423	6.96048	6.84894	6.86835	6.74319	6.62578	6.63174	1	1	1	Proteins related to lipid metabolism	GDSL family	lipase acylhydrolase (GDSL family)
AT1G55260	7.8954	7.70639	7.58655	7.70251	7.70375	7.65031	7.76269	7.70526	8.0397	7.91613	1	1	1	Proteins related to lipid metabolism	lipid transfer protein (LTP)	non-specific lipid-transfer protein (AtLTPg6)
AT1G65310	6.14014	6	6.37324	6.07555	6.37133	6.46219	6.38008	6.17085	6.43497	6	1	1	1	Proteins acting on cell wall polysaccharides	glycoside hydrolase (GH)	glycoside hydrolase family 16 - GH16 (endoxyloglucan transferase) (At-XTH17)
AT1G66250	6.16101	6.53294	6.53718	6.64946	6.39158	6.78695	6.57583	7.05132	6.27054	6.39097	1	1	1	Proteins acting on cell wall polysaccharides	glycoside hydrolase (GH)	glycoside hydrolase family 17 - GH17 (beta-1,3-glucosidase)
AT1G67750	6.68508	6.85659	6.69384	6.5569	6.75007	6.73526	7.11681	6.609	6.45548	6.99009	1	1	1	Proteins acting on cell wall polysaccharides	polysaccharide lyase (PL)	polysaccharide lyase family 1 - PL1 (pectate lyase) (AtPLL16)
AT1G67830	7.12986	7.0904	7.11753	7.03385	7.21138	7.3116	7.00688	7.19399	7.18976	6.84487	1	1	1	Proteins related to lipid metabolism	GDSL family	lipase acylhydrolase (GDSL family)
AT1G69295	6.8113	6.92715	6.66185	6.43446	6.67361	6.96225	6.86328	6.68504	6.5917	6.91069	1	1	1	Proteins with interaction domains (with proteins or polysaccharides)		expressed protein (X8 domain that may be involved in carbohydrate binding)
AT1G69530	7.83698	7.70131	8.07284	7.7209	7.73041	7.67949	7.92531	7.54592	7.99345	7.77509	1	1	1	Proteins acting on cell wall polysaccharides	expansin	alpha-expansin (ATHEXP ALPHA 1.2) (AtEXPA1)
AT1G71040	7.12308	7.32945	7.00239	7.03998	7.08459	6.84198	7.03299	7.14261	6.76274	7.12822	1	1	1	Oxido-reductases	multicopper oxidase	multicopper oxidase (LPR2, LOW PHOSPHATE ROOT 2)
AT1G71695	8.89095	8.91708	8.91079	8.78736	8.95456	8.87225	8.89511	8.86772	8.93487	9.02042	1	1	1	Oxido-reductases	class III peroxidases	peroxidase (AtPrx12)
AT1G72610	8.03048	8.08474	8.02113	8.21283	8.02392	8.26916	8.4829	8.2587	7.52994	7.96278	1	1	1	Miscellaneous		germin (subfamily 3 member 1, GLP1)
AT1G73620	7.06638	6.90769	7.00562	6.88389	7.06857	7.04201	7.10331	6.94388	7.10101	6.71655	1	1	1	Miscellaneous	thaumatin	thaumatin (PR5)
AT1G74210	7.24622	7.56865	7.29993	7.36771	7.32369	7.35037	7.24989	7.28884	7.50578	7.6257	1	1	1	Proteins related to lipid metabolism		glycerophosphoryl diester phosphodiesterase (GDPD5)
AT1G76160	8.19074	7.97727	8.20296	8.09222	8.16162	8.15558	8.39904	8.26172	8.23848	8.31115	1	1	1	Oxido-reductases	multicopper oxidase	multicopper oxidase (AtSKS5, homologous to SKU5)
AT1G77480	6.83436	6.573	6.95456	6.5608	6.62034	6.96473	6.76251	6.92429	6.98013	7.09103	1	1	1	Proteases	Asp protease	Asp protease (pepsin family) (Peptidase family A01.A26, MEROPS)
AT1G78040	7.11698	7.13504	7.14481	7.02807	7.07542	6.92673	7.20513	7.02481	7.12697	6.87531	1	1	1	Unknown function		expressed protein (Ole e1 allergen domain)
AT1G78830	9.0337	9.01834	9.01752	9.02846	9.0381	8.88232	8.99652	8.847	9.07795	8.92723	1	1	1	Proteins with interaction domains (with proteins or polysaccharides)	lectin	lectin (curculin-like)
AT1G79720	6.77151	6.64856	6.5989	6.67989	6.68114	6.81758	6.73533	6.79515	6.9632	6.77611	1	1	1	Proteases	Asp protease	Asp protease (pepsin family) (Peptidase family A01.A07, MEROPS)
AT2G02130	6.58188	6.76235	6.60627	6.52655	6.38339	6.47815	6.5268	6.66865	6.39952	6.49954	1	1	1	Miscellaneous		Low-molecular-weight Cysteine-Rich protein 68 (LCR68)/Defensin-like protein 1
AT2G02850	7.52862	7.52595	7.31058	7.43254	7.60322	7.90181	7.38808	7.57677	7.10946	7.35111	1	1	1	Oxido-reductases	blue copper binding protein	plantacyanin (blue copper binding protein) (AtPNC)
AT2G03980	7.26137	7.38692	6.85675	7.01448	6.93014	6.49422	6.96898	6.68194	7.23191	7.05232	1	1	1	Proteins related to lipid metabolism	GDSL family	lipase acylhydrolase (GDSL family)
AT2G04780	7.38397	7.46215	7.50452	7.71422	7.68484	7.47164	7.3528	7.6274	7.61561	7.6997	1	1	1	Signaling	fasciclin-like arabinogalactan protein (FLA)	fasciclin-like arabinogalactan protein (FLA7)
AT2G14900	7.18357	7.08552	6.97393	6.43446	6.96985	6.81594	6.99181	6.63746	6.76292	6.66823	1	1	1	Miscellaneous	gibberellic acid-stimulated Arabidopsis (GASA) protein	gibberellic acid-stimulated Arabidopsis (AtGASA7) protein
AT2G15320	6.87423	6.99764	7.01602	7.06809	6.86491	7.21981	6.95754	7.06967	6.81028	7.28761	1	1	1	Proteins with interaction domains (with proteins or polysaccharides)	LRR protein	expressed protein (LRR domains)
AT2G22420	6.36956	6.34513	6.41122	6.71191	6.50303	6.68641	6.29719	6.63417	6.04656	6.68386	1	1	1	Oxido-reductases	class III peroxidases	peroxidase (AtPrx17)
AT2G22990	6.62215	6.32639	6.32674	6.46282	6.48103	6.37234	6.20164	6.28829	6.20891	5.9669	1	1	1	Proteases	Ser carboxypeptidase	Ser carboxypeptidase (AtSCPL8) (Peptidase family S10.A10, MEROPS)
AT2G24280	6.76345	6.55222	6.85911	6.85339	6.94666	6.91148	6.86127	6.88608	6.76334	6.73662	1	1	1	Proteases	Ser carboxypeptidase	Ser carboxypeptidase (Peptidase family S28.A01, MEROPS)
AT2G25060	7.71481	7.71215	7.77267	7.77003	7.8714	7.74676	7.70046	7.8648	7.69268	7.73649	1	1	1	Oxido-reductases	blue copper binding protein	early nodulin AtEN7 homologous to blue copper binding protein
AT2G27190	7.63036	7.81475	7.78501	7.83867	7.71029	7.70134	7.716	7.71485	7.66873	7.67219	1	1	1	Miscellaneous	purple acid phosphatase (PAP)	purple acid phosphatase (AtPAP12)
AT2G27920	7.65435	7.72323	7.65483	7.62783	7.50422	7.58399	7.79622	7.40686	7.71147	7.71261	1	1	1	Proteases	Ser carboxypeptidase	Ser carboxypeptidase (AtSCPL51) (Peptidase family S10.017, MEROPS)
AT2G28790	8.8193	8.7278	8.67604	8.65746	8.76189	8.79271	8.42323	8.68836	8.66723	8.80399	1	1	1	Miscellaneous	thaumatin	thaumatin (PR5)
AT2G32810	7.46771	7.5567	7.6483	7.60387	7.61445	7.66593	7.70907	7.72148	7.57857	7.60766	1	1	1	Proteins acting on cell wall polysaccharides	glycoside hydrolase (GH)	glycoside hydrolase family 35 - GH35 (beta-galactosidase) (AtBGAL9)
AT2G33330	6.43223	6.4838	6.63026	6.29917	6.57615	6.40427	6.69135	6.43647	6.55379	6.57068	1	1	1	Unknown function		expressed protein (Gnk2-homologous domain, antifungal protein of Ginkgo seeds)
AT2G33530	7.78155	7.84958	7.84803	7.96679	7.88001	7.89613	7.64096	7.89735	7.82633	8.12627	1	1	1	Proteases	Ser carboxypeptidase	Ser carboxypeptidase (AtSCPL46) (Peptidase family, S10.A42, MEROPS)
AT2G34810	7.05737	7.21231	7.11786	7.0153	7.16629	7.14231	7.34021	7.17423	7.15287	7.3905	1	1	1	Oxido-reductases	berberine-bridge oxido-reductase	berberine-bridge enzyme (S)-reticulin:oxygen oxido-reductase
AT2G34930	7.08404	7.03706	7.10935	7.03709	7.00394	6.94738	7.37304	7.35214	7.08569	6.99414	1	1	1	Proteins with interaction domains (with proteins or polysaccharides)	LRR protein	expressed protein (LRR domains)
AT2G35860	7.12768	6.79467	7.24014	7.09663	6.77456	7.13693	6.92215	6.908	7.01312	6.98424	1	1	1	Signaling	fasciclin-like arabinogalactan protein (FLA)	fasciclin-like arabinogalactan protein (FLA16)
AT2G37640	6.74194	6.79311	6.76792	6.56239	6.74418	6.31566	6.7767	6.75242	6.92651	6.40539	1	1	1	Proteins acting on cell wall polysaccharides	expansin	alpha-expansin (ATHEXP ALPHA 1.9) (AtEXPA3)
AT2G38540	8.587	8.80051	8.20834	8.80104	8.89022	7.95178	8.5388	8.47316	8.27269	8.90959	1	1	1	Proteins related to lipid metabolism	lipid transfer protein (LTP)	non-specific lipid-transfer protein (AtLTP1.5, AtLTP1)
AT2G39780	7.70469	7.78642	7.78171	7.76966	7.76567	7.80613	7.84784	7.87536	7.84313	7.97966	1	1	1	Miscellaneous		ribonuclease T2
AT2G42800	7.69591	7.52096	7.5044	7.48371	7.61624	7.59355	7.24586	7.55935	7.44223	7.39172	1	1	1	Proteins with interaction domains (with proteins or polysaccharides)	LRR protein	expressed protein (LRR domains)
AT2G43550	7.69222	7.41065	8.01634	7.44322	7.78953	7.74045	7.91874	7.66148	8.01602	7.70872	1	1	1	Miscellaneous		expressed protein (scorpion toxin-like domain, defensin)
AT2G43620	7.30244	7.19665	6.69708	6.87571	7.19522	7.1233	7.12403	7.1563	7.17811	6.96906	1	1	1	Proteins acting on cell wall polysaccharides	glycoside hydrolase (GH)	glycoside hydrolase family 19 - GH19
AT2G44290	7.15638	6.99494	7.12175	7.10561	7.22758	7.23802	7.20241	6.98888	7.17645	7.16463	1	1	1	Proteins related to lipid metabolism	lipid transfer protein (LTP)	non-specific lipid-transfer protein (AtLTPg13)
AT2G46930	7.9964	7.96789	8.25712	8.01796	8.04461	8.03342	8.05166	7.94508	7.9483	7.79847	1	1	1	Proteins acting on cell wall polysaccharides	carbohydrate esterase (CE)	carbohydrate esterase family 13 - CE13 (pectin acylesterase - PAE) (AtPAE3)
AT3G02110	7.90093	7.95096	7.88808	7.73977	7.8093	7.85936	7.80544	7.85833	7.76478	7.77228	1	1	1	Proteases	Ser carboxypeptidase	Ser carboxypeptidase (AtSCPL25) (Peptidase family S10.A40, MEROPS)
AT3G02740	6.44004	6.62223	6.62441	6.86282	6.5391	6.60521	6.2094	6.38774	6.67163	6.99181	1	1	1	Proteases	Asp protease	Asp protease (pepsin family) (Peptidase family A01.A23, MEROPS)
AT3G04290	6.79535	6.78249	6.66592	6.55558	6.67562	6.66658	6.66664	6.59471	6.54508	6.75701	1	1	1	Proteins related to lipid metabolism	GDSL family	lipase acylhydrolase (GDSL family)
AT3G05180	6.93626	7.18833	7.09249	7.11133	6.97026	6.93642	7.2183	7.31261	7.25258	7.515	1	1	1	Proteins related to lipid metabolism	GDSL family	lipase acylhydrolase (GDSL family)
AT3G05730	7.03609	6.96694	6.57795	6.59684	6.42549	6.7432	7.16028	7.41088	6.55805	6.6821	1	1	1	Unknown function		expressed protein
AT3G05910	7.8763	7.85792	7.92803	7.88112	7.96431	7.93988	7.99581	7.97468	7.89303	7.79519	1	1	1	Proteins acting on cell wall polysaccharides	carbohydrate esterase (CE)	carbohydrate esterase family 13 - CE13 (pectin acylesterase - PAE) (AtPAE12)
AT3G06035	6.68022	6.86673	6.53718	6.73562	6.42549	6.65503	6.46574	6.67934	6.58117	7.04795	1	1	1	Unknown function		expressed protein
AT3G07010	7.15487	7.46927	7.36045	7.36866	7.46369	7.42423	7.30128	7.39254	7.24153	7.66008	1	1	1	Proteins acting on cell wall polysaccharides	polysaccharide lyase (PL)	polysaccharide lyase family 1 - PL1 (pectate lyase) (AtPLL20)
AT3G07470	6.7375	6.55448	6.73223	6.59153	6.71968	6.74031	6.80184	6.74168	6.22993	7.02274	1	1	0.503756	Unknown function		expressed protein (DUF538)
AT3G07990	6.83593	7.13453	6.88532	6.55727	6.72755	6.7802	6.85805	6.79467	6.92204	6.76106	1	1	1	Proteases	Ser carboxypeptidase	Ser carboxypeptidase (AtSCPL27) (Peptidase family S10.A23, MEROPS)
AT3G08030	9.14493	9.17931	9.05553	9.16894	9.11535	9.25533	9.07118	9.10811	9.08734	9.01395	1	1	1	Unknown function		expressed protein (DUF642)
AT3G08680	6.58258	6.4838	6.53718	6.43446	6.42549	6.46219	6.46574	6.53483	6.43033	6.49954	1	1	1	Signaling	LRR-RLK	leucine-rich repeat receptor protein kinase (LRR III subfamily)
AT3G08770	6.70033	6.967	7.17698	7.14971	6.85887	7.22237	6.70695	6.68836	7.13074	6.92294	1	1	1	Proteins related to lipid metabolism	lipid transfer protein (LTP)	non-specific lipid transfer protein (AtLTP1.6, AtLTP6)
AT3G10410	7.58127	7.54583	7.42267	7.49472	7.49388	7.52292	7.53556	7.41769	7.57811	7.38756	1	1	1	Proteases	Ser carboxypeptidase	Ser carboxypeptidase (AtSCPL49) (Peptidase family S10.A45, MEROPS)
AT3G11700	6.8012	6.89767	6.78827	6.67632	6.69717	6.72707	6.75908	6.57078	6.58299	6.62997	1	1	1	Signaling	fasciclin-like arabinogalactan protein (FLA)	fasciclin-like arabinogalactan protein (FLA18)
AT3G12700	7.54148	7.56188	7.62622	7.58515	7.58767	7.60522	7.61227	7.70172	7.64153	7.60543	1	1	1	Proteases	Asp protease	Asp protease (pepsin family) (Peptidase family A01.A30, MEROPS)
AT3G13560	7.5456	7.57663	7.53671	7.60643	7.55506	7.50028	7.53087	7.49768	7.62667	7.67612	1	1	1	Proteins acting on cell wall polysaccharides	glycoside hydrolase (GH)	glycoside hydrolase family 17 - GH17 (beta-1,3-glucosidase)
AT3G14067	7.41349	7.4077	7.56541	7.44037	7.35499	7.36382	7.40582	7.51813	7.24333	7.38832	1	1	1	Proteases	Ser protease	Ser protease (subtilisin) (AtSBT1.4) (Peptidase family S08.A28, MEROPS)
AT3G14310	8.89034	8.75799	8.79027	8.72076	8.74007	8.64504	8.9187	8.69405	8.90818	9.02465	1	1	1	Proteins acting on cell wall polysaccharides	carbohydrate esterase (CE)	carbohydrate esterase family 8 - CE8 (pectin methylesterase - PME) (AtPME3)
AT3G16370	7.41849	7.48053	7.46294	7.50004	7.37417	7.63747	7.53348	7.61732	7.51254	7.28115	1	1	1	Proteins related to lipid metabolism	GDSL family	lipase acylhydrolase (GDSL family)
AT3G16850	7.81595	7.41838	7.11194	7.37696	7.59355	7.51061	7.6885	7.60605	7.91551	7.81282	1	1	1	Proteins acting on cell wall polysaccharides	glycoside hydrolase (GH)	glycoside hydrolase family 28 - GH28 (polygalacturonase)
AT3G18080	8.2103	8.50505	8.21234	8.16312	8.35844	8.39672	8.21942	8.49247	8.0588	8.17549	1	1	1	Proteins acting on cell wall polysaccharides	glycoside hydrolase (GH)	glycoside hydrolase family 1 - GH1 (beta-glucosidase) (AtBGLU44)
AT3G20570	7.55238	7.17737	7.18958	7.25167	7.15102	7.1329	7.48394	7.28802	7.22567	6.97964	1	1	1	Oxido-reductases	blue copper binding protein	early nodulin AtEN14 homologous to blue copper binding protein
AT3G20820	9.00644	8.93237	9.07532	8.95427	9.0089	9.01738	9.06633	8.99747	9.0383	9.00537	1	1	1	Proteins with interaction domains (with proteins or polysaccharides)	LRR protein	expressed protein (LRR domains)
AT3G22060	8.31735	8.31703	8.33007	8.49562	8.38524	8.36802	8.60969	8.3853	8.48556	8.38917	1	1	1	Unknown function		expressed protein (Gnk2-homologous domain, antifungal protein of Ginkgo seeds)
AT3G24480	6.67698	6.86541	6.66635	6.59922	6.27003	6.46468	6.89738	6.76044	6.5796	6.85698	1	1	1	Structural proteins	leucine-rich repeat extensin (LRX)	LRR-extensin (AtLRX4)
AT3G25700	7.44823	7.48457	7.2999	7.33358	7.48213	7.63813	7.30324	7.45384	7.45703	7.53622	1	1	1	Proteases	Asp protease	Asp protease (pepsin family) (Peptidase family A01.A11, MEROPS)
AT3G26380	7.85366	7.75228	7.83143	7.95654	7.99466	7.86271	7.82818	7.88893	7.87464	7.95896	1	1	1	Proteins acting on cell wall polysaccharides	glycoside hydrolase (GH)	glycoside hydrolase family 27 - GH27 (alpha-galactosidase/melibiase)
AT3G26720	7.12627	6.98506	7.20734	6.78486	7.2094	6.91806	7.06739	6.78213	7.0903	6.85127	1	1	1	Proteins acting on cell wall polysaccharides	glycoside hydrolase (GH)	glycoside hydrolase family 38 - GH38 (alpha-mannosidase)
AT3G28200	7.41689	7.21078	7.37994	7.18927	7.34574	7.14589	7.11953	6.99338	7.38435	7.09598	1	1	1	Oxido-reductases	class III peroxidases	peroxidase (AtPrx31)
AT3G32980	6.61638	6.66538	7.14599	6.95858	6.35	6.73803	6.89611	6.40872	7.26741	6.83986	1	1	1	Oxido-reductases	class III peroxidases	peroxidase (AtPrx32) (ATP16A)
AT3G44100	8.04922	8.54814	8.05406	8.28169	8.15889	8.24293	8.21225	8.28944	8.22833	8.30065	1	1	1	Proteins related to lipid metabolism		expressed protein (MD-2-related lipid-recognition (ML) domain)
AT3G45940	6.64921	6	6.53718	6.63821	6.42549	6.54097	6.49221	6.56136	6.61531	6.32483	1	1	1	Proteins acting on cell wall polysaccharides	glycoside hydrolase (GH)	glycoside hydrolase family 31 - GH31 (alpha-glucosidase)
AT3G47800	7.58361	7.95572	7.564	7.56973	7.522	7.43443	7.62355	7.77853	7.7624	7.72696	1	1	1	Miscellaneous		aldose-1-epimerase
AT3G48460	7.58967	7.45767	7.64544	7.77046	7.6413	7.81117	7.51287	7.51417	7.67688	7.56715	1	1	1	Proteins related to lipid metabolism	GDSL family	lipase acylhydrolase (GDSL family)
AT3G49110	7.85684	7.63869	7.17212	7.67134	7.34833	7.09238	6.46574	6.49143	7.94352	7.05337	1	1	1	Oxido-reductases	class III peroxidases	peroxidase (AtPrx33)
AT3G49120	8.71274	8.98334	8.37765	8.56886	8.61829	8.85122	8.42068	8.82499	8.61103	8.88884	1	1	1	Oxido-reductases	class III peroxidases	peroxidase (AtPrx34)
AT3G54400	9.00917	8.99961	8.87523	8.96174	8.90227	9.0065	8.88707	9.02294	8.92186	8.91022	1	1	1	Proteases	Asp protease	Asp protease (pepsin family) (Peptidase family A01.A48, MEROPS)
AT3G55260	8.14049	7.67682	7.91953	7.84331	7.9763	7.8815	7.98395	7.84234	8.31432	8.12004	1	1	1	Proteins acting on cell wall polysaccharides	glycoside hydrolase (GH)	glycoside hydrolase family 20 - GH20 (N-acetyl-beta-glucosaminidase)
AT3G59010	7.43397	7.37303	7.40152	7.4873	7.3829	7.34272	7.363	7.50165	7.32791	7.6055	1	1	1	Proteins acting on cell wall polysaccharides	carbohydrate esterase (CE)	carbohydrate esterase family 8 - CE8 (pectin methylesterase - PME) (AtPME35)
AT3G61490	6.93721	7.0745	7.16353	7.25943	7.20375	7.29162	7.17447	7.11517	7.1784	6.93267	1	1	1	Proteins acting on cell wall polysaccharides	glycoside hydrolase (GH)	glycoside hydrolase family 28 - GH28 (polygalacturonase)
AT3G62020	6.88533	6.81402	7.13557	6.78824	6.91478	6.87985	6.60953	6.78298	6.78806	6.49954	1	1	1	Miscellaneous		germin (subfamily 2 member 4, GLP10)
AT4G00230	7.29265	7.17847	7.12816	7.31281	7.23371	7.26171	7.30755	7.3934	6.90385	7.22102	1	1	1	Proteases	Ser protease	Ser protease (subtilisin) (AtSBT4.14, XSP1, XYLEM SERINE PROTEINASE 1) (Peptidase family S08.A14, MEROPS)
AT4G00860	7.0623	7.03732	7.22137	7.16484	7.03641	7.11325	7.1721	7.34452	7.34291	7.39986	1	1	1	Unknown function		expressed protein (DUF1138)
AT4G01130	6.86931	6.94821	6.77969	6.59411	6.6654	6.88776	6.80196	7.18507	6.7384	6.89341	1	1	1	Proteins related to lipid metabolism	GDSL family	lipase acylhydrolase (GDSL family)
AT4G01610	7.62969	7.72236	7.56265	7.76635	7.72126	7.68924	7.75926	7.76123	7.74796	8.06137	1	1	1	Proteases	Cys protease	Cys protease (cathepsin B family) (Peptidase family C01.144, MEROPS)
AT4G01985	6	6.12036	6	6	6	6.24598	6	6	6	6	1	1	1	Unknown function		expressed protein
AT4G02330	6.74215	6.65242	6.88565	6.77299	6.82023	7.00744	6.88495	6.7054	6.8477	6.66917	1	1	1	Proteins acting on cell wall polysaccharides	carbohydrate esterase (CE)	carbohydrate esterase family 8 - CE8 (pectin methylesterase - PME) (AtPME41)
AT4G08770	6.16966	6.31131	6.53718	6.25314	6.00979	6.46219	6.46574	6.49143	6.30478	6.56642	1	1	1	Oxido-reductases	class III peroxidases	peroxidase (AtPrx37) (ATP38)
AT4G08780	6.4555	6.53022	6	6.40075	6.17003	6.38206	6.16175	6.4593	6.26057	6.3984	1	1	1	Oxido-reductases	class III peroxidases	peroxidase (AtPrx38)
AT4G08950	7.53025	7.37449	7.2752	7.13306	7.28624	7.20617	7.60758	7.43485	7.17787	7.13762	1	1	1	Miscellaneous		phosphate-induced (phi) protein 1
AT4G12730	8.02023	7.96532	8.00495	8.08326	8.11831	8.00248	7.96658	8.04003	7.78432	8.17392	1	1	1	Signaling	fasciclin-like arabinogalactan protein (FLA)	fasciclin-like arabinogalactan protein (FLA2)
AT4G12880	7.93527	8.16941	7.75635	8.00136	7.81526	8.05201	8.20088	8.25148	7.50014	8.13006	1	1	1	Oxido-reductases	blue copper binding protein	early nodulin AtEN20 homologous to blue copper binding protein
AT4G13340	7.16729	7.14657	7.30351	7.10896	7.07322	6.9879	7.29031	7.17192	7.04916	7.24135	1	1	1	Structural proteins	leucine-rich repeat extensin (LRX)	LRR-extensin (AtLRX3)
AT4G16500	8.20733	8.37647	8.12877	7.7817	8.28162	7.51252	8.26224	8.16371	7.09285	8.697	1	1	1	Proteins with interaction domains (with proteins or polysaccharides)	protease inhibitor	proteinase inhibitor family I25 (phytostatin) (cystatin family, I25.033, MEROPS) (AtCYS-4)
AT4G18250	6.97734	7.36633	6.86231	7.23838	7.06448	7.2139	7.25234	7.12424	7.75622	7.61112	1	1	1	Signaling		thaumatin receptor protein kinase
AT4G20830	7.65048	7.89126	7.67988	7.70517	7.83666	7.8777	7.85599	8.02791	7.77406	7.75518	1	1	1	Oxido-reductases	berberine-bridge oxido-reductase	berberine-bridge enzyme (S)-reticulin:oxygen oxido-reductase
AT4G21585	6.66456	6.56281	6.7073	6.8091	6.76539	6.70479	6.61648	6.69425	6.61979	6.78067	1	1	1	Proteins related to lipid metabolism		phospholipase C/P1 nuclease
AT4G21620	6.5851	6.79751	6.66856	6.46569	6.83357	6.66415	6.46574	6.84943	7.06315	7.04831	1	1	1	Unknown function		expressed protein
AT4G21960	6.93457	7.40955	7.18281	7.24105	6.90996	7.01013	6.86549	7.20271	7.14477	7.1704	1	1	1	Oxido-reductases	class III peroxidases	peroxidase (AtPrx42)
AT4G22485	6.54033	6.83491	6.99761	6.36495	6.58525	6.52329	6.71279	6.7564	6.57	6.25881	1	1	1	Proteins related to lipid metabolism	lipid transfer protein (LTP)	homologous to non-specific lipid transfer protein
AT4G22505	6.70082	6.4838	7.09756	6.63474	6.82096	6.5817	6.65177	6.51238	6.62582	6.58875	1	1	1	Proteins related to lipid metabolism	lipid transfer protein (LTP)	homologous to non-specific lipid transfer protein
AT4G23170	7.56045	7.56715	7.60684	7.66905	7.23179	7.54159	7.26757	7.28743	7.62939	7.71802	1	1	1	Unknown function		expressed protein (Gnk2-homologous domain, antifungal protein of Ginkgo seeds)
AT4G23500	7.06775	7.09966	7.13789	7.27087	7.08352	7.19182	7.0263	7.2134	7.09913	7.20979	1	1	1	Proteins acting on cell wall polysaccharides	glycoside hydrolase (GH)	glycoside hydrolase family 28 - GH28 (polygalacturonase)
AT4G24780	7.74479	7.63506	7.64628	7.61248	7.58312	7.52367	7.80332	7.69085	7.71091	7.69392	1	1	1	Proteins acting on cell wall polysaccharides	polysaccharide lyase (PL)	polysaccharide lyase family 1 - PL1 (pectate lyase) (AtPLL19)
AT4G25240	6.77231	6.37464	6.58746	6.41854	6.78041	6.26272	6.73434	6.36427	6.54579	6.60294	1	1	1	Oxido-reductases	multicopper oxidase	multicopper oxidase (AtSKS1, homologous to SKU5)
AT4G25260	6.92881	6.98839	7.04443	6.82763	6.80166	6.89424	7.03592	6.96826	6.94068	6.80056	1	1	1	Proteins with interaction domains (with proteins or polysaccharides)	pectin methyl esterase inhibitor (PMEI)	plant invertase/pectin methylesterase inhibitor (PMEI) (AtPMEI7)
AT4G26690	7.08698	6.76264	7.19317	6.92408	7.15386	7.08077	7.1054	7.19194	7.02079	7.10986	1	1	1	Proteins related to lipid metabolism		glycerophosphoryl diester phosphodiesterase (GDPDL3, GDPL2) (MRH5/SHV3, MORPHOGENESIS OF ROOT HAIR 5)
AT4G27520	8.30069	8.34356	8.49347	8.45817	8.41103	8.49086	8.42073	8.45237	8.39252	8.54986	1	1	1	Oxido-reductases	blue copper binding protein	early nodulin AtEN12 homologous to blue copper binding protein
AT4G28100	7.5511	7.35848	7.18988	6.96713	7.56582	7.39556	7.60597	6.97961	7.61069	7.33359	1	1	1	Unknown function		expressed protein
AT4G29270	7.42632	7.77461	7.79521	7.91729	7.42559	7.95624	7.68436	7.99653	7.68467	7.3922	1	1	1	Miscellaneous		acid phosphatase (class B)
AT4G30020	6.77581	6.88443	7.02308	7.00194	6.83153	7.05386	6.99201	7.12847	7.00034	6.86538	1	1	1	Proteases	Ser protease	Ser protease (subtilisin) (AtSBT2.6) (Peptidase family S08.A02, MEROPS)
AT4G30810	6.88701	6.90036	6.69802	7.01586	6.61667	7.04273	6.82867	7.07131	7.09332	6.99963	1	1	1	Proteases	Ser carboxypeptidase	Ser carboxypeptidase (AtSCPL29) (Peptidase family S10.A32, MEROPS)
AT4G31140	7.2433	7.07663	7.00175	6.73425	7.13688	7.12468	7.02804	6.98843	7.24296	7.26503	1	1	1	Proteins acting on cell wall polysaccharides	glycoside hydrolase (GH)	glycoside hydrolase family 17 - GH17 (beta-1,3-glucosidase)
AT4G31840	7.45823	7.3681	7.45623	7.37718	7.37848	7.44429	7.43028	7.53652	7.45482	7.62592	1	1	1	Oxido-reductases	blue copper binding protein	early nodulin AtEN13 homologous to blue copper binding protein
AT4G32460	7.6953	7.40575	7.76189	7.79357	7.53394	7.79605	7.41326	7.43473	7.82215	7.65124	1	1	1	Unknown function		expressed protein (DUF642)
AT4G33420	6.454	6	6.57267	6.34226	6.33307	6.25777	6.82051	6.44959	6.7991	6.54228	1	1	1	Oxido-reductases	class III peroxidases	peroxidase (AtPrx47)
AT4G34180	6.75314	6.79784	6.42597	7.48063	6.62399	6.70122	6.30482	6.73068	6.73821	6.86238	1	1	1	Unknown function		expressed protein (cyclase domain)
AT4G34260	6.61294	6.47486	6.65204	6.64165	6.75067	6.72284	6.57482	6.48093	6.61047	6.4229	1	1	1	Proteins acting on cell wall polysaccharides	glycoside hydrolase (GH)	glycoside hydrolase family 65 - GH65 (alpha-L-fucosidase)
AT4G35220	6.94207	7.02488	7.02971	6.73786	6.77916	6.91987	6.9576	6.87446	6.94963	6.91731	1	1	1	Unknown function		expressed protein (cyclase domain)
AT4G35350	7.15785	7.03223	7.1843	7.10993	7.16514	6.99968	7.00439	6.959	7.10322	6.77028	1	1	1	Proteases	Cys protease	Cys protease (cathepsin family)
AT4G36430	6.7433	6.66598	6.17344	6.71576	6.2747	6.86877	6.42491	6.57923	6.42467	6.49102	1	1	1	Oxido-reductases	class III peroxidases	peroxidase (AtPrx49) (ATP31)
AT4G36945	6.57551	6.86276	7.09173	6.82147	6.93982	6.97613	7.03276	6.93501	7.06029	7.3495	1	1	1	Proteins related to lipid metabolism		expressed protein (phospholipase C, phosphatidylinositol-specific, X domain)
AT4G37520	7.0849	7.02488	6.94746	7.28176	7.2505	7.54417	7.18645	7.13134	6.89072	7.19834	1	1	1	Oxido-reductases	class III peroxidases	peroxidase (AtPrx50)
AT4G37530	6.83956	6.95441	6.90391	6.83531	6.70062	6.94374	6.2901	6.6552	6.92414	7.24184	1	1	1	Oxido-reductases	class III peroxidases	peroxidase (AtPrx51)
AT4G39090	6.97036	7.29374	6.65342	7.03999	7.02371	6.97469	6.89219	7.1796	6.94658	7.15937	1	1	1	Proteases	Cys protease	Cys protease (cathepsin family)
AT5G05960	8.1507	8.12224	8.23043	8.29751	8.2704	8.37337	8.44222	8.25397	8.22975	7.84037	1	1	1	Proteins related to lipid metabolism	lipid transfer protein (LTP)	non-specific lipid transfer protein (AtLTPd8)
AT5G06860	7.76025	7.90287	7.50673	7.81496	7.71866	8.04652	7.74048	7.7263	7.66527	7.39708	1	1	1	Proteins with interaction domains (with proteins or polysaccharides)	LRR protein	PGIP1 (LRR domains)
AT5G07030	9.18778	9.28463	9.18219	9.30854	9.23701	9.31689	9.20181	9.28233	9.20887	9.22911	1	1	1	Proteases	Asp protease	Asp protease (pepsin family) (Peptidase family A01.A54, MEROPS)
AT5G08380	8.21555	8.34542	8.02056	8.23983	8.17637	8.41122	8.14376	8.30001	8.29228	8.26856	1	1	1	Proteins acting on cell wall polysaccharides	glycoside hydrolase (GH)	glycoside hydrolase family 27 - GH27 (alpha-galactosidase/melibiase)
AT5G09440	7.43107	7.30548	7.44013	7.2736	7.47657	7.68194	7.64452	7.55379	7.29854	7.42752	1	1	1	Miscellaneous		phosphate-induced (phi) protein 1
AT5G10560	7.80892	7.876	7.99693	8.01802	7.93036	7.81921	8.02655	7.99521	7.9542	8.12039	1	1	1	Proteins acting on cell wall polysaccharides	glycoside hydrolase (GH)	glycoside hydrolase family 3 - GH3
AT5G10770	6.85334	7.03658	6.5683	6.68986	6.76464	6.52322	6.55317	6.74137	6.40688	6.95732	1	1	1	Proteases	Asp protease	Asp protease (pepsin family) (Peptidase family A01.A15, MEROPS)
AT5G11420	8.83881	8.779	8.8551	8.87427	8.825	8.82982	8.87368	8.98741	8.89671	8.99747	1	1	1	Unknown function		expressed protein (DUF642)
AT5G11720	7.06791	7.07876	7.19118	7.16281	7.19943	7.01416	7.27627	7.29424	7.1632	6.9927	1	1	1	Proteins acting on cell wall polysaccharides	glycoside hydrolase (GH)	glycoside hydrolase family 31 - GH31 (alpha-glucosidase) (AGLU1)
AT5G12950	6.64034	6.38802	6.55366	6.51427	6.70574	6.50637	6.54788	6.52509	6.75051	6.73525	1	1	1	Unknown function		expressed protein (DUF1680)
AT5G13140	7.05922	6.90911	7.06448	7.16328	6.98782	7.00726	7.02283	7.02482	7.14887	7.19145	1	1	1	Unknown function		expressed protein (Ole e1 allergen domain)
AT5G14920	8.72992	8.26946	8.35526	8.38645	8.55294	8.5968	8.48045	8.42707	8.53998	8.32133	1	1	1	Miscellaneous	gibberellic acid-stimulated Arabidopsis (GASA) protein	gibberellic acid-stimulated Arabidopsis (AtGASA14) protein
AT5G15230	6.9261	7.03102	7.14684	6.72509	7.16982	7.4701	6.56084	7.02844	6.62839	6.75965	1	1	1	Miscellaneous	gibberellic acid-stimulated Arabidopsis (GASA) protein	gibberellic acid-stimulated Arabidopsis (AtGASA4) protein
AT5G20630	7.4334	7.1971	7.39402	7.35628	7.50089	7.26374	7.67307	7.38633	7.59592	6.63428	1	1	1	Miscellaneous		germin (AtGER3, GLP2, GLP3)
AT5G20950	8.46662	8.51554	8.54238	8.48125	8.63396	8.55774	8.51654	8.65119	8.47042	8.37947	1	1	1	Proteins acting on cell wall polysaccharides	glycoside hydrolase (GH)	glycoside hydrolase family 3 - GH3
AT5G23210	7.84038	7.55207	7.76389	7.85907	7.76035	7.96093	7.77673	7.62496	7.78787	7.98802	1	1	1	Proteases	Ser carboxypeptidase	Ser carboxypeptidase (AtSCPL34) (Peptidase family S10.A39, MEROPS)
AT5G23400	7.3632	7.3145	7.35697	7.24009	7.29841	7.36989	7.37055	7.39733	7.22699	7.3162	1	1	1	Proteins with interaction domains (with proteins or polysaccharides)	LRR protein	expressed protein (LRR domains)
AT5G23870	6.83578	6.55496	6.68821	6.88124	6.83461	6.95666	6.95538	6.79262	6.54167	7.04596	1	1	1	Proteins acting on cell wall polysaccharides	carbohydrate esterase (CE)	carbohydrate esterase family 13 - CE13 (pectin acylesterase - PAE) (AtPAE9)
AT5G25090	7.12921	7.34169	7.06822	7.37226	7.51352	7.03063	7.40447	7.11882	7.4532	7.42223	1	1	1	Oxido-reductases	blue copper binding protein	early nodulin AtEN6 homologous to blue copper binding protein
AT5G34850	8.70454	8.72329	8.74238	8.74788	8.71874	8.64019	8.71073	8.65771	8.54452	8.60319	1	1	1	Miscellaneous	purple acid phosphatase (PAP)	purple acid phosphatase (AtPAP26)
AT5G39570	7.58503	7.74969	7.78613	7.86938	7.77051	7.84086	7.77327	7.79743	7.72079	7.94394	1	1	1	Unknown function		expressed protein
AT5G40020	6.85709	6.38424	6.71548	6.85729	6.66344	6.66542	6.7383	6.62539	6.8885	6.6157	1	1	1	Miscellaneous	thaumatin	thaumatin (PR5)
AT5G41870	6.57882	6.9205	6.84397	7.15087	6.80601	6.75155	6.83421	6.77271	6.70861	7.29943	1	1	1	Proteins acting on cell wall polysaccharides	glycoside hydrolase (GH)	glycoside hydrolase family 28 - GH28 (polygalacturonase)
AT5G42100	6.72816	6.95654	6.63318	6.80598	6.83711	6.91723	6.72882	6.79744	6.66596	6.67992	1	1	1	Proteins acting on cell wall polysaccharides	glycoside hydrolase (GH)	glycoside hydrolase family 17 - GH17 (beta-1,3-glucosidase)
AT5G44130	6.80695	6.81969	7.06618	7.61918	7.18266	6.73127	6.46574	7.15068	6.74198	6.84382	1	1	1	Signaling	fasciclin-like arabinogalactan protein (FLA)	fasciclin-like arabinogalactan protein (FLA13)
AT5G45950	7.88979	7.69526	7.94172	7.74547	7.94717	7.73703	7.61853	7.76072	7.96343	7.67894	1	1	1	Proteins related to lipid metabolism	GDSL family	lipase acylhydrolase (GDSL family)
AT5G48900	6.63162	6.6861	6.81244	6.73293	6.65525	6.88693	6.5985	6.79874	6.84982	7.05605	1	1	1	Proteins acting on cell wall polysaccharides	polysaccharide lyase (PL)	polysaccharide lyase family 1 - PL1 (pectate lyase) (AtPLL21)
AT5G51550	6.51103	6.62879	6.78966	6.63197	6.60048	6.54279	6.62928	6.81774	6.43033	6.28058	1	1	1	Miscellaneous		phosphate-induced (phi) protein 1
AT5G51750	7.07591	7.27906	6.87681	6.99387	7.13103	7.27221	6.77435	7.1887	7.15223	7.21241	1	1	1	Proteases	Ser protease	Ser protease (subtilisin) (AtSBT1.3) (Peptidase family S08.A25, MEROPS)
AT5G55450	6.55566	6.61139	6.55258	6.64004	6.64602	6.48661	6.78762	6.39009	6.81969	6.60903	1	1	1	Proteins related to lipid metabolism	lipid transfer protein (LTP)	non-specific lipid transfer protein (AtLTPd4)
AT5G55480	7.28111	7.26256	7.19401	7.32858	7.23032	7.13607	7.261	7.27394	7.29489	7.46064	1	1	1	Proteins related to lipid metabolism		glycerophosphoryl diester phosphodiesterase (GDPDL4, GPDL1)
AT5G55730	8.12166	7.97976	8.14291	7.96194	8.0893	8.05202	8.22526	8.08081	8.20008	8.10074	1	1	1	Signaling	fasciclin-like arabinogalactan protein (FLA)	fasciclin-like arabinogalactan protein (FLA1)
AT5G58090	5.98435	6.4838	6.47068	6.069	6.33241	6.32094	6.45189	6.51377	6.01755	6.52229	1	1	1	Proteins acting on cell wall polysaccharides	glycoside hydrolase (GH)	glycoside hydrolase family 17 - GH17 (beta-1,3-glucosidase)
AT5G58300	6.57499	6.53601	6.56369	6.55277	6.46511	6.53979	6.61192	6.59906	6.37965	6.69819	1	1	1	Signaling	LRR-RLK	leucine-rich repeat receptor protein kinase
AT5G58390	6.87339	6.73689	6.63307	7.00132	6.78215	6.93002	6.42766	6.58756	6.49898	7.18801	1	1	1	Oxido-reductases	class III peroxidases	peroxidase (AtPrx67)
AT5G58480	6.61998	6.4838	6.67214	6.43446	6.42125	6.48587	6.78239	6.69932	6.64289	6.45057	1	1	1	Proteins acting on cell wall polysaccharides	glycoside hydrolase (GH)	glycoside hydrolase family 17 - GH17 (beta-1,3-glucosidase)
AT5G62350	8.76409	8.55553	8.64164	8.57538	8.70701	8.54881	8.67349	8.63457	8.66287	8.48598	1	1	1	Proteins with interaction domains (with proteins or polysaccharides)	pectin methyl esterase inhibitor (PMEI)	plant invertase/pectin methylesterase inhibitor (PMEI-like)
AT5G63140	6.82332	6.70897	6.71695	6.75909	6.81312	6.65412	7.11449	6.98417	6.96365	6.62888	1	1	1	Miscellaneous	purple acid phosphatase (PAP)	purple acid phosphatase (AtPAP29)
AT5G63180	7.62007	7.80403	7.6714	7.52565	7.82658	7.77217	7.72169	7.79828	7.51263	7.59276	1	1	1	Proteins acting on cell wall polysaccharides	polysaccharide lyase (PL)	polysaccharide lyase family 1 - PL1 (pectate lyase) (AtPLL15)
AT5G63810	7.20043	7.40689	7.49134	7.37968	7.50367	7.4657	7.38357	7.40465	7.22007	7.15791	1	1	1	Proteins acting on cell wall polysaccharides	glycoside hydrolase (GH)	glycoside hydrolase family 35 - GH35 (beta-galactosidase) (AtBGAL10)
AT5G64260	6.82438	6.72143	6.7917	6.72001	6.85647	6.87765	6.81394	6.94198	6.81148	6.8375	1	1	1	Miscellaneous		phosphate-induced (phi) protein 1
AT5G64570	7.51338	7.54331	7.64266	7.67495	7.58559	7.61508	7.72999	7.73934	7.60917	7.63743	1	1	1	Proteins acting on cell wall polysaccharides	glycoside hydrolase (GH)	glycoside hydrolase family 3 - GH3 (beta-xylosidase) (AtBXL4)
AT5G65730	7.73917	7.7942	7.90752	7.87176	7.61304	7.79614	7.76183	7.86482	7.65662	7.71438	1	1	1	Proteins acting on cell wall polysaccharides	glycoside hydrolase (GH)	glycoside hydrolase family 16 - GH16 (endoxyloglucan transferase) (At-XTH6)
AT5G66590	6.98568	6.76159	6.95023	6.70757	7.00674	6.90806	6.92192	6.82569	6.74452	6.79048	1	1	1	Miscellaneous		pathogenesis-related protein (PR) 1 / Cys-rich secretory protein (SCP)

## Sheet: Table S1B
Supplementary Table S1B. Quantification of the CWPs extracted from purified cell walls of A. thaliana floral stems by saline solutions (CaCl2 0.2 M and LiCl 2M) and identified by LC-MS/MS and bioinformatics.
The functional annotation was done according to the presence of predicted functional domains as in ProtAnnDB (www.polebio.lrsv.ups-tlse.fr/ProtAnnDB/).
		higher values
		lower values
		ANOVA (in red if significant, that is lower than 1E-04)
AGI code	Col.22	Col.15	Roch.22	Roch.15	Grip.22	Grip.15	Hern.22	Hern.15	Hosp.22	Hosp.15	ecotype	temperature	interaction	Functional classes	Protein families	(Putative) functions
AT4G12890	7.03474	6.70515	6	6	6.42788	6.55355	6	6	6	6	4.76417e-17	0.681495	3.96875e-08	Oxido-reductases		thiol reductase (GILT family)
AT5G03350	8.02369	8.43325	7.8323	8.22999	8.17269	8.49509	6.04176	6.04065	7.34838	7.92468	1.86224e-15	2.36382e-05	0.00123209	Proteins with interaction domains (with proteins or polysaccharides)	lectin	lectin (legume lectin domain)
AT3G49110	7.11024	7.38013	8.1998	8.20181	8.03781	8.31441	6.46695	6	8.44439	8.34805	3.28494e-15	1	4.99142e-05	Oxido-reductases	class III peroxidases	peroxidase (AtPrx33)
AT4G21640	6.42265	6	6.46257	6	6.42788	6	6	6	6	6	9.15101e-13	2.07054e-14	2.55475e-14	Proteases	Ser protease	Ser protease (subtilisin) (AtSBT3.15) (Peptidase family S08.A42, MEROPS)
AT1G24450	7.34763	7.3886	7.4058	7.55406	7.40877	7.52163	6	6	7.30724	7.53539	1.24897e-12	1	0.360009	Miscellaneous		ribonuclease III
AT1G78450	6	6	7.1099	6.96226	6	6	6	6	6	6	4.52873e-11	1	0.941518	Unknown function		expressed protein (SOUL heme-binding domain)
AT4G24350	7.0803	6.55826	7.14566	7.08032	7.18128	7.22744	7.46052	7.02049	6.4715	6	8.58401e-11	8.79458e-06	2.51385e-05	Miscellaneous		phosphorylase
AT1G78820	8.25593	8.27238	8.17634	8.28682	7.52202	7.76876	7.79181	7.77549	8.29151	8.37858	1.51139e-10	1	0.0383271	Proteins with interaction domains (with proteins or polysaccharides)	lectin	lectin (curculin-like)
AT4G21650	8.49862	8.72126	8.80671	8.82018	7.66613	7.66759	7.75819	7.96461	8.74665	8.55536	8.88629e-09	1	0.0592149	Proteases	Ser protease	Ser protease (subtilisin) (AtSBT3.13) (Peptidase family S08.A48, MEROPS)
AT2G39850	8.15038	7.72224	8.33938	7.95121	7.63431	7.37837	8.38137	8.0354	7.67123	7.61237	9.23203e-09	1.76341e-05	0.00554288	Proteases	Ser protease	Ser protease (subtilisin) (AtSBT4.1) (Peptidase family S08.A46, MEROPS)
AT1G70710	6.42265	6.722	6.58153	6.67705	6.52152	6.5345	6	6	6	6	1.35913e-08	1	0.0244117	Proteins acting on cell wall polysaccharides	glycoside hydrolase (GH)	glycoside hydrolase family 9 - GH9 (endo-1,3(4)-beta-glucanase) (AtCEL1)
AT2G12480	6	6	6	6	6	6	6	6	6.74155	6.61328	1.74989e-08	1	0.606345	Proteases	Ser carboxypeptidase	Ser carboxypeptidase (AtSCPL43) (Peptidase family S10.A33, MEROPS)
AT1G31710	6	6.26998	8.19178	7.89601	6.67169	6.54226	7.67179	7.63511	6.99676	6.74475	2.02103e-08	1	0.263832	Oxido-reductases		copper amine oxidase
AT3G15356	7.59929	7.59444	7.45217	7.40482	7.5779	7.56547	8.15059	8.12537	7.87608	7.91734	2.23722e-08	1	0.623974	Proteins with interaction domains (with proteins or polysaccharides)	lectin	lectin (legume lectin domain)
AT1G03230	8.25992	8.12733	7.6025	7.59101	7.98714	7.98902	7.76748	7.7077	7.89532	7.88955	3.18768e-08	1	0.450972	Proteases	Asp protease	Asp protease (pepsin family) (Peptidase family A1, subfamily A1B, non-peptidase homologues, MEROPS) (homologous to carrot EDGP and tomato XEGIP)
AT3G14210	8.74947	8.71404	6.34583	6.13683	6.24096	6.41679	6.16229	6.32134	6.42956	6.46635	5.03506e-08	1	0.728798	Proteins related to lipid metabolism	GDSL family	lipase acylhydrolase (GDSL family)
AT3G17520	6	6	6	6	6	6.7474	7.37596	6	6	6	1.00166e-07	0.195485	4.31861e-12	Unknown function		late embryogenesis abundant protein (LEA)
AT2G14610	8.09044	8.33065	6.40718	7.20024	7.34488	7.36999	7.637	6.98041	8.11647	8.41063	1.06496e-07	1	0.000382852	Miscellaneous		pathogenesis-related protein (PR) 1 / Cys-rich secretory protein (SCP)
AT3G57260	6.40385	6.81014	6	6	6	6.508	7.05772	6	6.4715	6.79087	1.17113e-07	1	1.61816e-11	Proteins acting on cell wall polysaccharides	glycoside hydrolase (GH)	glycoside hydrolase family 17 - GH17 (beta-1,3-glucosidase) (BG2) (PR2)
AT5G19240	6	6	6	6	6	6.508	6.70992	6.6573	7.34771	7.57458	1.55607e-07	1	0.18219	Unknown function		expressed protein
AT1G12570	8.55049	8.6183	8.54523	8.54411	8.18283	8.24681	8.12451	8.39529	8.1751	8.27666	3.60303e-07	0.0485135	0.0236273	Oxido-reductases		expressed protein (GMC oxido-reductase domain)
AT3G12500	6	6	6	6	6	6	6.84482	6	6	6	7.82208e-07	0.000315121	1.95152e-09	Proteins acting on cell wall polysaccharides	glycoside hydrolase (GH)	glycoside hydrolase family 19 - GH19
AT1G28610	6.43748	6.6312	6.67269	6.73093	6	6	6	6	6	6	9.3548e-07	1	0.531228	Unknown function		expressed protein (SGNH hydrolase-type esterase domain)
AT1G66970	7.21963	7.40806	7.00756	6.90655	7.03546	7.09684	7.24462	7.2343	7.58774	7.64548	1.45119e-06	1	0.0369654	Proteins related to lipid metabolism		glycerophosphoryl diester phosphodiesterase (GDPDL1, GDPL3)
AT2G18660	6.89362	7.20607	6.00061	6.14664	6.19359	6.49367	7.04559	6.91616	7.15623	7.40582	1.76301e-06	1	0.237013	Proteins acting on cell wall polysaccharides	expansin	homologous to expansin (EXR3)
AT5G25980	9.11222	8.77282	8.97195	8.64292	9.08442	8.75638	6.73121	7.13942	6.81779	7.53412	3.42831e-06	1	0.0889272	Proteins acting on cell wall polysaccharides	glycoside hydrolase (GH)	glycoside hydrolase family 1 - (thioglucoside hydrolase 2) (TGG2) (AtBGLU37)
AT2G47010	7.07182	7.1066	6.98565	7.19286	7.15032	7.10632	6.10582	6.57824	7.13253	7.10728	5.74258e-06	1	0.0277542	Unknown function		expressed protein
AT4G16260	6	6	6	6	6	6	6.83829	6.45584	6.2932	6	6.1641e-06	1	0.0148674	Proteins acting on cell wall polysaccharides	glycoside hydrolase (GH)	glycoside hydrolase family 17 - GH17 (beta-1,3-glucosidase)
AT2G26010	6	6.07623	6.05345	6	6	6.66838	7.62199	6.63227	6.54437	6	6.5193e-06	1	1.68361e-06	Miscellaneous		homologous to gamma thionin (defensin)
AT4G12870	6.04389	6	7.36484	7.60082	7.6871	7.92756	7.45755	7.26556	7.34286	7.46689	8.11618e-06	1	0.734738	Oxido-reductases		thiol reductase (GILT family)
AT4G19905	6.55543	6.53574	6	6.7497	6.60613	6.83687	6.63012	6	6	6	1.16376e-05	1	4.37268e-08	Miscellaneous		Low-molecular-weight Cysteine-Rich protein (LCR38)
AT3G21770	7.43791	7.51784	6.99518	6.95497	7.34593	7.11822	7.17667	7.01457	6.83704	6.74448	1.83064e-05	1	0.0996716	Oxido-reductases	class III peroxidases	peroxidase (AtPrx30) (ATP7a)
AT1G41830	8.1683	8.38359	8.40202	8.43705	8.37	8.41671	8.29329	8.28245	8.09168	7.99106	2.06681e-05	1	0.00436373	Oxido-reductases	multicopper oxidase	multicopper oxidase (AtSKS6, homologous to SKU5)
AT1G27950	7.85644	7.90084	7.87793	7.9214	7.9041	8.13243	8.094	8.00811	8.31133	8.38374	2.07302e-05	1	0.0119692	Proteins related to lipid metabolism	lipid transfer protein (LTP)	non-specific lipid transfer protein (AtLTPg4, LTPG1)
AT5G08370	8.04882	7.88698	7.36302	7.43617	7.95221	7.62358	7.75304	7.91145	7.82664	7.7909	2.45543e-05	1	0.00434423	Proteins acting on cell wall polysaccharides	glycoside hydrolase (GH)	glycoside hydrolase family 27 - GH27 (alpha-galactosidase/melibiase)
AT4G28250	7.58215	7.85324	7.75256	7.5433	7.66379	7.57116	7.40991	7.30669	7.43635	7.42968	4.22163e-05	1	0.00600477	Proteins acting on cell wall polysaccharides	expansin	beta-expansin (AtEXPB3)
AT1G65900	6.65789	6.58406	6.75372	6.828	6.88002	6.79959	6.67019	6.79449	6.16251	6	4.57202e-05	1	0.41093	Unknown function		expressed protein
AT3G16850	8.23313	8.07623	7.97868	7.82741	7.77941	7.84035	8.2094	8.32104	8.45267	8.26175	5.51792e-05	1	0.0652796	Proteins acting on cell wall polysaccharides	glycoside hydrolase (GH)	glycoside hydrolase family 28 - GH28 (polygalacturonase)
AT2G45220	7.94498	7.65303	7.7336	7.85416	7.81052	7.76142	7.28609	7.63748	7.35698	6.75821	5.68391e-05	1	0.000289749	Proteins acting on cell wall polysaccharides	carbohydrate esterase (CE)	carbohydrate esterase family 8 - CE8 (pectin methylesterase - PME) (AtPME17)
AT1G14210	7.62517	7.31403	7.62866	7.48334	7.36586	7.39834	7.56825	7.62264	6.49401	6.7269	6.62511e-05	1	0.15133	Miscellaneous		ribonuclease T2
AT4G21590	8.05387	7.97397	8.04679	8.09887	8.11525	8.1309	7.61369	7.82272	7.76274	7.53523	9.81901e-05	1	0.0161875	Proteins related to lipid metabolism		phospholipase C/P1 nuclease
AT4G12880	8.6344	8.48469	8.20939	7.64867	7.9638	7.66318	8.36014	8.60813	8.09848	8.04506	0.000173723	1	0.0196157	Oxido-reductases	blue copper binding protein	early nodulin AtEN20 homologous to blue copper binding protein
AT1G78060	8.21962	8.39591	8.02928	8.04206	8.25429	8.22974	8.37252	8.33893	8.23008	8.33864	0.000223199	1	0.0403205	Proteins acting on cell wall polysaccharides	glycoside hydrolase (GH)	glycoside hydrolase family 3 - GH3 (beta-xylosidase) (AtBXL7)
AT3G02740	7.01148	7.00834	7.19376	7.16202	7.0353	7.33835	7.10196	7.08432	7.44066	7.45291	0.000236725	1	0.0503179	Proteases	Asp protease	Asp protease (pepsin family) (Peptidase family A01.A23, MEROPS)
AT2G43610	6.42265	6	6	6	6.01566	6.4296	6	6	6	6	0.000253336	1	9.66366e-09	Proteins acting on cell wall polysaccharides	glycoside hydrolase (GH)	glycoside hydrolase family 19 - GH19
AT4G33355	7.42325	7.57102	7.75648	7.80808	7.54657	7.74376	7.57584	7.62556	7.2994	6.91387	0.000267068	1	0.00866677	Proteins related to lipid metabolism	lipid transfer protein (LTP)	non-specific lipid transfer protein (AtLTP1.9, AtLTP11)
AT2G22970	7.80068	7.88987	6.95289	6.94896	7.0918	6.72219	6.40932	6.92622	7.24763	7.2256	0.000278524	1	0.0937152	Proteases	Ser carboxypeptidase	Ser carboxypeptidase (SCPL11) (Peptidase family S10.A08, MEROPS)
AT3G04720	6.8393	6.9405	7.15816	6.84925	7.08183	7.35887	7.83882	7.39984	7.77349	7.50274	0.000300875	1	0.0307995	Proteins with interaction domains (with proteins or polysaccharides)		expressed protein (Barwin domain, defense protein)
AT1G71040	6.34675	6.54501	6.36672	6.61617	6	6	6.41905	6.45584	6.42252	6	0.000332238	1	0.000204448	Oxido-reductases	multicopper oxidase	multicopper oxidase (LPR2, LOW PHOSPHATE ROOT 2)
AT3G10740	8.22316	7.83522	8.13197	7.80568	7.97326	7.49169	7.9291	7.79785	7.67829	7.34133	0.000508903	0.00187199	0.286795	Proteins acting on cell wall polysaccharides	glycoside hydrolase (GH)	glycoside hydrolase family 51 - GH51 (alpha-arabinofuranosidase)
AT5G34940	8.05496	7.93824	7.85624	7.96873	7.90983	7.94236	7.81559	7.95037	7.75168	7.74065	0.000509436	1	0.00187854	Proteins acting on cell wall polysaccharides	glycoside hydrolase (GH)	glycoside hydrolase family 79 - GH79 (endo-beta-glucuronidase/heparanase)
AT4G13710	6.1782	6.59889	6.53779	6.65572	6.07805	6.48362	6.0867	6.12926	6	6	0.000519563	0.311226	0.0107539	Proteins acting on cell wall polysaccharides	polysaccharide lyase (PL)	polysaccharide lyase family 1 - PL1 (pectate lyase) (AtPLL25)
AT5G60950	6.38785	6.3493	6.67481	6.89231	6.91904	6.88934	7.10974	7.05813	7.48601	7.54445	0.00052094	1	0.696473	Signaling	COBRA-like	COBRA-like (AtCOBL5)
AT3G16530	7.51084	7.58839	7.54994	7.57737	7.70603	7.90145	8.3581	7.94722	7.90774	7.82972	0.000586815	1	0.0113465	Proteins with interaction domains (with proteins or polysaccharides)	lectin	lectin (legume lectin domain)
AT5G63810	7.7298	7.72043	7.72733	7.49463	7.84848	7.63308	7.53314	7.54702	7.41602	7.34955	0.000685601	1	0.120729	Proteins acting on cell wall polysaccharides	glycoside hydrolase (GH)	glycoside hydrolase family 35 - GH35 (beta-galactosidase) (AtBGAL10)
AT2G43590	7.04445	7.347	6.39796	6.84924	6.70431	7.91455	8.08332	6.61627	6.26909	6.47659	0.000738263	1	8.15048e-07	Proteins acting on cell wall polysaccharides	glycoside hydrolase (GH)	glycoside hydrolase family 19 - GH19
AT2G28470	7.9935	8.03487	7.98805	7.82301	8.0027	7.82309	7.83608	7.87249	7.77875	7.75236	0.00107603	1	0.048376	Proteins acting on cell wall polysaccharides	glycoside hydrolase (GH)	glycoside hydrolase family 35 - GH35 (beta-galactosidase) (AtBGAL8)
AT1G72230	7.38904	7.36226	7.47068	7.68326	7.43715	7.48774	7.7533	7.75512	7.93343	7.83532	0.00116752	1	0.243167	Oxido-reductases	blue copper binding protein	uclacyanin AtUCC8 (blue copper binding protein)
AT2G05920	8.3559	8.41793	8.33902	8.28761	8.32186	8.32439	7.97612	8.20143	8.12178	8.28074	0.00225256	1	0.0139752	Proteases	Ser protease	Ser protease (subtilisin) (AtSBT1.8, AF70) (Peptidase family S08.A24, MEROPS)
AT1G78850	7.66069	7.56558	7.42764	7.67995	7.76833	8.04408	7.86112	7.6065	7.93794	7.89943	0.00262208	1	0.0146854	Proteins with interaction domains (with proteins or polysaccharides)	lectin	lectin (curculin-like)
AT3G12145	9.33337	9.25582	9.28293	9.35255	9.29606	9.50591	9.22576	9.06081	9.19449	9.09421	0.00283939	1	0.000884245	Proteins with interaction domains (with proteins or polysaccharides)	LRR protein	homologous to PGIP1 (LRR protein FLR1)
AT1G54020	7.32673	7.21002	7.55237	7.88275	7.63206	8.21439	8.00523	7.6139	7.32024	7.20801	0.00294212	1	0.00228017	Proteins related to lipid metabolism	GDSL family	lipase acylhydrolase (GDSL family)
AT3G28830	6.60414	6.58735	6.53059	6	6.92427	6.13167	6.1073	6.03263	6.15199	6	0.00297597	0.115628	0.00673505	Unknown function		expressed protein (DUF1216)
AT5G09760	7.36484	7.54668	7.5336	7.50297	7.57487	7.59037	7.42153	7.47498	7.63636	7.6513	0.00366672	0.540838	0.111501	Proteins acting on cell wall polysaccharides	carbohydrate esterase (CE)	carbohydrate esterase family 8 - CE8 (pectin methylesterase - PME) (AtPME51)
AT5G42180	8.774	8.39508	8.78244	8.3731	8.69039	8.11071	8.28014	8.60394	8.818	8.66906	0.00415903	0.138231	2.17438e-06	Oxido-reductases	class III peroxidases	peroxidase (AtPrx64)
AT2G38380	6.75981	6.1262	7.17764	6.86202	6.83338	6.93069	7.75504	7.06016	6.71522	6.74822	0.00449789	0.246317	0.0164524	Oxido-reductases	class III peroxidases	peroxidase (AtPrx22) (ATPEA)
AT3G32980	6.46657	6.54501	6.5946	7.01224	6.42788	6.55722	6.39414	6.45584	7.00522	6.93505	0.00586789	1	0.0880491	Oxido-reductases	class III peroxidases	peroxidase (AtPrx32) (ATP16A)
AT1G65590	8.43152	8.11976	8.18377	8.00597	8.05079	7.90733	8.07198	8.07387	8.19295	8.1109	0.00699934	0.00817781	0.010635	Proteins acting on cell wall polysaccharides	glycoside hydrolase (GH)	glycoside hydrolase family 20 - GH20 (N-acetyl-beta-glucosaminidase)
AT4G38770	7.78829	7.49687	7.59172	7.47451	7.838	7.36982	7.78237	7.84458	7.39331	7.33864	0.00704301	1	0.00575443	Structural proteins	proline-rich protein (PRP)	proline-rich protein (AtPRP4)
AT3G52500	8.37958	8.51184	8.23384	8.31073	8.33773	8.46453	8.34722	8.24551	7.58107	7.60236	0.00763259	1	0.828337	Proteases	Asp protease	Asp protease (pepsin family) (Peptidase family A01.A47, MEROPS)
AT2G32810	7.25685	7.07668	7.4232	7.37341	7.42168	7.19451	7.49938	7.39089	7.45626	7.37468	0.00840086	0.0943095	0.427093	Proteins acting on cell wall polysaccharides	glycoside hydrolase (GH)	glycoside hydrolase family 35 - GH35 (beta-galactosidase) (AtBGAL9)
AT1G03220	8.13451	7.97821	7.8329	7.81683	7.90374	7.90888	8.13749	8.013	8.1437	8.12519	0.00886152	1	0.204953	Proteases	Asp protease	Asp protease (pepsin family) (Peptidase family A1, subfamily A1B, non-peptidase homologues, MEROPS) (homologous to carrot EDGP and tomato XEGIP)
AT2G15320	6	6.59674	6.60876	6.84392	6.70562	6.8143	7.14202	6.9259	6.70504	6.77097	0.00928426	1	0.0120426	Proteins with interaction domains (with proteins or polysaccharides)	LRR protein	expressed protein (LRR domains)
AT3G62750	6.8858	6.71835	6.08047	6	6	6.19094	6.32498	6.44381	6.05954	6.16567	0.0104879	1	0.411987	Proteins acting on cell wall polysaccharides	glycoside hydrolase (GH)	glycoside hydrolase family 1 - GH1 (beta-glucosidase) (AtBGLU8)
AT5G51750	7.54227	7.82397	7.8338	7.46642	7.81314	7.49982	7.46896	7.45518	7.62941	7.55162	0.0121966	1	0.00610676	Proteases	Ser protease	Ser protease (subtilisin) (AtSBT1.3) (Peptidase family S08.A25, MEROPS)
AT1G33600	7.39361	7.4316	7.27231	6.97619	7.33556	7.43255	7.78016	7.60943	7.25031	7.27215	0.0126154	1	0.117109	Proteins with interaction domains (with proteins or polysaccharides)	LRR protein	expressed protein (LRR domains)
AT2G16430	7.20136	7.28581	7.22239	7.08465	6.874	7.1152	6.69497	6.74432	7.22325	7.2388	0.0127902	1	0.656699	Miscellaneous	purple acid phosphatase (PAP)	purple acid phosphatase (AtPAP10)
AT5G06860	7.37512	7.22786	7.00959	7.326	7.64789	7.82404	7.4487	7.31291	7.08374	7.21304	0.0138325	1	0.0997687	Proteins with interaction domains (with proteins or polysaccharides)	LRR protein	PGIP1 (LRR domains)
AT5G24780	7.97032	8.14863	8.38261	8.60851	8.34745	8.66724	8.31471	7.87823	8.36033	8.05537	0.0156044	1	0.000216678	Miscellaneous		acid phosphatase (class B)
AT1G49740	7.41713	7.40135	7.25668	7.21587	7.40107	7.47055	6.92149	6.98498	7.36392	7.43092	0.0175531	1	0.974318	Proteins related to lipid metabolism		expressed protein (phospholipase C, phosphatidylinositol-specific, X domain)
AT1G54010	6.98826	6.97874	7.16149	7.47447	7.14444	7.56927	7.51223	7.1001	6.70573	6.89881	0.0183844	1	0.00358586	Proteins related to lipid metabolism	GDSL family	lipase acylhydrolase (GDSL family)
AT1G78680	8.0475	8.0296	7.38627	7.22777	7.90216	7.70453	7.87839	7.97843	7.57664	7.8306	0.018501	1	0.40361	Proteases	peptidase C26	peptidase C26 (peptidase family C26.003, MEROPS)(GGH2)
AT4G25000	6	6.55192	6	6	6	6.11954	6.69823	6.31742	6.59833	6.47062	0.0196418	1	0.00276578	Proteins acting on cell wall polysaccharides	glycoside hydrolase (GH)	glycoside hydrolase family 13 - GH13 (alpha amylase)
AT3G14040	8.16638	7.8452	7.83115	7.4482	8.03341	7.50633	7.52896	7.43077	7.48048	7.20205	0.0287724	0.13375	0.42704	Proteins acting on cell wall polysaccharides	glycoside hydrolase (GH)	glycoside hydrolase family 28 - GH28 (polygalacturonase)
AT5G43060	7.67836	7.61646	7.57806	7.57465	7.76319	7.88139	7.50959	7.6434	7.84557	7.85812	0.0322026	1	0.416687	Proteases	Cys protease	Cys protease (papain family) (Peptidase family C01.A12) (RD21B)
AT5G12950	6.45771	6.10609	6.94841	6.85874	6.96679	6.47926	6.69512	6.31108	6.75804	6.4124	0.0356121	0.269472	0.623086	Unknown function		expressed protein (DUF1680)
AT3G63470	6.95457	6.50376	7.07873	6.90953	7.08563	6.69424	6.35336	6.59909	6.83379	6.6614	0.0369638	1	0.00937675	Proteases	Ser carboxypeptidase	Ser carboxypeptidase (AtSCPL40) (Peptidase family S10.A41, MEROPS)
AT3G47800	7.12724	7.13887	6.94872	6.68539	6.65742	6.28449	7.18319	6.76519	6.85392	6.60222	0.0380789	0.298602	0.221866	Miscellaneous		aldose-1-epimerase
AT3G61820	7.96219	8.23598	8.16964	8.05621	8.07109	8.16993	7.95996	7.7393	8.09795	7.8814	0.0398214	1	0.000402124	Proteases	Asp protease	Asp protease (pepsin family) (Peptidase family A01.A13, MEROPS)
AT2G10940	8.90618	8.67965	8.87479	8.59704	8.99452	8.41884	8.56699	8.5433	8.52645	8.32899	0.0418362	0.0133951	0.0352102	Proteins related to lipid metabolism	lipid transfer protein (LTP)	homologous to non-specific lipid transfer protein
AT1G49750	8.47208	8.43801	8.28767	8.26966	8.2761	8.21833	8.22668	8.3228	8.37799	8.36561	0.0425523	1	0.251186	Proteins with interaction domains (with proteins or polysaccharides)	LRR protein	expressed protein (LRR domains)
AT3G62820	7.80623	7.77472	7.82427	7.85933	7.45571	7.88962	7.94421	7.77573	7.6574	7.27353	0.0446936	1	0.000734148	Proteins with interaction domains (with proteins or polysaccharides)		plant invertase/ pectin methylesterase inhibitor (PMEI)
AT3G28200	7.11192	7.02623	6.89538	6.83001	7.22631	6.89333	6.62783	6.51061	6.95109	6.47297	0.0460586	1	0.230742	Oxido-reductases	class III peroxidases	peroxidase (AtPrx31)
AT1G20190	7.75048	7.57434	7.89249	7.70252	7.93708	7.69301	7.68146	7.63935	7.9848	7.85199	0.0473436	1	0.472242	Proteins acting on cell wall polysaccharides	expansin	alpha-expansin (ATHEXP ALPHA 1.14) (AtEXPA11)
AT3G55430	7.4692	7.37029	7.37123	7.08372	7.50983	7.33881	7.26597	7.21458	6.97677	7.01825	0.049947	1	0.768054	Proteins acting on cell wall polysaccharides	glycoside hydrolase (GH)	glycoside hydrolase family 17 - GH17 (beta-1,3-glucosidase)
AT5G64570	7.8052	8.3683	8.1697	8.08289	7.82778	8.28191	8.2326	8.07114	8.44107	8.51448	0.051199	1	0.000714136	Proteins acting on cell wall polysaccharides	glycoside hydrolase (GH)	glycoside hydrolase family 3 - GH3 (beta-xylosidase) (AtBXL4)
AT1G75040	7.32817	7.96214	6.88848	8.01993	7.43281	7.95097	8.42858	7.58373	7.91461	8.14528	0.0540791	0.130379	1.28293e-06	Miscellaneous	thaumatin	thaumatin (PR5)
AT2G04690	7.8918	7.67781	7.69933	7.74895	7.83811	7.82097	7.43667	7.60197	7.94031	7.87603	0.0572319	1	0.0835335	Unknown function		expressed protein (human brain CREG protein domain)
AT5G06870	8.54296	8.31083	8.75568	8.7968	8.75015	8.9444	8.63624	8.45432	8.44966	8.39304	0.059182	1	0.228925	Proteins with interaction domains (with proteins or polysaccharides)	LRR protein	PGIP2 (LRR domains)
AT5G05960	8.03781	7.85156	8.1292	7.91744	7.80756	7.8242	7.96546	7.95467	7.78903	7.5675	0.0670743	1	0.354573	Proteins related to lipid metabolism	lipid transfer protein (LTP)	non-specific lipid transfer protein (AtLTPd8)
AT5G49180	7.3875	7.3987	7.01729	7.16001	7.54278	7.36169	7.1701	6.34792	6.81881	6.3211	0.0710135	1	0.0422399	Proteins acting on cell wall polysaccharides	carbohydrate esterase (CE)	carbohydrate esterase family 8 - CE8 (pectin methylesterase - PME) (AtPME58)
AT4G18250	6.41829	6.98644	6.85333	6.42507	6.87778	6.56296	7.14629	6.84488	7.27519	7.23146	0.0778944	1	0.00273863	Signaling		thaumatin receptor protein kinase
AT4G12900	6.54804	6.55674	6	6	6.21644	6.47525	6.78352	6.91905	6	6.36337	0.0830054	1	0.71858	Oxido-reductases		thiol reductase (GILT family)
AT4G30610	7.93269	7.89334	7.99334	7.82287	7.9253	7.72311	7.61569	7.81458	7.87841	7.76116	0.0886498	1	0.00115377	Proteases	Ser carboxypeptidase	Ser carboxypeptidase (AtSCPL24, BRS1, Brassinosteroid-Insensitive BRI suppressor 1) (Peptidase family S10.015, MEROPS)
AT3G07130	6.66221	6.71465	6.44787	6.3434	6.43042	6.27938	6.72618	7.03866	6	6.39159	0.0932843	1	0.407212	Miscellaneous	purple acid phosphatase (PAP)	purple acid phosphatase (AtPAP15)
AT5G05340	6.90988	6.71076	6.64466	7.1762	7.00705	7.51188	7.75363	6.92799	6.73809	6.53293	0.0973566	1	0.00029146	Oxido-reductases	class III peroxidases	peroxidase (AtPrx52)
AT1G53070	8.8171	8.69843	8.67573	8.80347	8.58519	8.64679	8.73752	8.86603	8.8029	8.75965	0.104303	1	0.0161676	Proteins with interaction domains (with proteins or polysaccharides)	lectin	lectin (legume lectin domain)
AT5G09730	8.06755	7.99802	7.81488	7.99591	8.09686	8.11012	7.66694	7.63629	7.92918	7.79819	0.106073	1	0.526889	Proteins acting on cell wall polysaccharides	glycoside hydrolase (GH)	glycoside hydrolase family 3 - GH3
AT2G06850	8.56588	8.26519	8.31292	7.98005	8.40555	7.99999	8.25586	8.11973	8.20701	8.03817	0.108161	0.0101599	0.307302	Proteins acting on cell wall polysaccharides	glycoside hydrolase (GH)	glycoside hydrolase family 16 - GH16 (endoxyloglucan transferase) (At-XTH4)
AT4G37800	7.39188	6.812	7.40599	7.24275	7.37846	7.03818	6.85541	6.88962	7.10974	6.96146	0.110493	0.132376	0.0130109	Proteins acting on cell wall polysaccharides	glycoside hydrolase (GH)	glycoside hydrolase family 16 - GH16 (endoxyloglucan transferase) (At-XTH7)
AT3G06770	7.26788	6.9561	7.00342	6.9529	7.29971	7.10703	7.05844	7.18024	7.07878	7.00017	0.111173	0.0178819	6.16949e-05	Proteins acting on cell wall polysaccharides	glycoside hydrolase (GH)	glycoside hydrolase family 28 - GH28 (polygalacturonase)
AT5G19110	6.31083	6.45075	7.02941	7.51694	7.12027	7.72952	6.79642	6.44638	6.83177	6.74128	0.129372	1	0.138319	Proteases	Asp protease	Asp protease (pepsin family) (Peptidase family A1, subfamily A1B, non-peptidase homologues, MEROPS) (homologous to carrot EDGP and tomato XEGIP)
AT5G40020	7.34008	6.81776	7.3074	7.18927	7.19833	7.03443	7.53563	7.41376	7.52704	7.2042	0.148258	0.0348809	0.058406	Miscellaneous	thaumatin	thaumatin (PR5)
AT3G19620	7.83101	7.84851	8.05204	8.18249	8.03441	8.1642	8.07491	7.81474	7.9555	7.86529	0.155432	1	0.0115248	Proteins acting on cell wall polysaccharides	glycoside hydrolase (GH)	glycoside hydrolase family 3 - GH3 (beta-xylosidase) (AtBXL5)
AT1G13900	7.86879	7.84615	7.96608	7.87197	7.80474	7.8303	8.07089	7.89858	8.01446	7.82288	0.175325	0.0394558	0.0376197	Miscellaneous	purple acid phosphatase (PAP)	purple acid phosphatase (AtPAP2)
AT1G66850	7.25697	7.38054	7.51367	7.6199	7.37033	7.5357	7.08715	7.11533	7.39206	7.38699	0.183859	1	0.909658	Proteins related to lipid metabolism	lipid transfer protein (LTP)	non-specific lipid-transfer protein (AtLTP2.5)
AT5G20230	5.93543	6	6.47664	6.48868	6.15348	7.04108	7.14893	6.71332	7.19271	6.73816	0.184255	1	0.0414951	Oxido-reductases	blue copper binding protein	stellacyanin AtSTC1, BCB (blue copper binding protein)
AT4G25900	8.14464	8.26587	8.10328	8.00391	8.19285	8.12581	8.26607	8.14864	8.28445	8.40644	0.191203	1	0.0448584	Miscellaneous		aldose-1-epimerase
AT1G33590	8.91823	8.8504	8.64085	8.58771	8.8213	8.91409	8.881	8.77199	8.73364	8.84296	0.193764	1	0.114703	Proteins with interaction domains (with proteins or polysaccharides)	LRR protein	expressed protein (LRR domains)
AT1G48750	7.14589	7.0665	7.87207	8.15338	7.59729	7.55273	7.98408	7.25667	7.79963	7.94021	0.221044	1	0.053786	Proteins related to lipid metabolism	lipid transfer protein (LTP)	non-specific lipid-transfer protein (AtLTP2.4)
AT3G57240	7.16727	7.47621	6.94708	7.05364	6.78641	7.11743	7.37605	7.35945	7.47315	7.87777	0.222932	1	0.398499	Proteins acting on cell wall polysaccharides	glycoside hydrolase (GH)	glycoside hydrolase family 17 - GH17 (beta-1,3-glucosidase) (BG3) (PR3)
AT5G48540	7.60847	7.34463	7.25659	7.17461	7.66574	7.40608	7.23549	7.16661	7.4192	7.37749	0.225478	1	0.161828	Unknown function		expressed protein (Gnk2-homologous domain, antifungal protein of Ginkgo seeds)
AT4G36195	8.12146	8.01104	8.15899	8.09368	8.14199	8.04457	8.13543	8.05049	8.04559	7.94644	0.228377	0.240714	0.526687	Proteases	peptidase family S28	Pro-Xaa carboxypeptidase (Peptidase family S28.A26, MEROPS)
AT1G15000	7.33374	7.23779	7.22802	7.29429	7.37471	7.22642	6.94546	7.06283	7.13581	7.13756	0.240129	1	0.244638	Proteases	Ser carboxypeptidase	Ser carboxypeptidase (AtSCPL50) (Peptidase family S10 unassigned peptidases, MEROPS)
AT5G66590	7.35096	7.24499	7.37463	7.35446	7.24016	6.79611	6.94808	7.11482	7.01526	6.97261	0.245814	1	0.140996	Miscellaneous		pathogenesis-related protein (PR) 1 / Cys-rich secretory protein (SCP)
AT3G22060	7.78165	7.27455	7.68053	7.63162	7.66632	7.40745	7.87974	7.57976	7.60572	7.41726	0.267316	5.6153e-05	0.00174791	Unknown function		expressed protein (Gnk2-homologous domain, antifungal protein of Ginkgo seeds)
AT4G24780	7.79786	7.77546	7.8143	7.58121	7.64174	7.56459	7.56274	7.65541	7.49565	7.44908	0.268836	1	0.655609	Proteins acting on cell wall polysaccharides	polysaccharide lyase (PL)	polysaccharide lyase family 1 - PL1 (pectate lyase) (AtPLL19)
AT5G53370	7.80873	7.97092	7.83828	7.89036	7.76006	7.63074	7.90869	8.14515	8.04334	8.02081	0.28776	1	0.13077	Proteins acting on cell wall polysaccharides	carbohydrate esterase (CE)	carbohydrate esterase family 8 - CE8 (pectin methylesterase - PME) (AtPME61)
AT5G23400	7.84277	7.76589	7.98197	7.80989	7.73862	7.80876	7.69382	7.76105	7.93575	7.84991	0.289021	1	0.110169	Proteins with interaction domains (with proteins or polysaccharides)	LRR protein	expressed protein (LRR domains)
AT2G46930	8.11661	8.07726	8.12947	7.82598	8.05597	7.9676	7.92103	7.90208	7.91839	7.93034	0.29152	1	0.560626	Proteins acting on cell wall polysaccharides	carbohydrate esterase (CE)	carbohydrate esterase family 13 - CE13 (pectin acylesterase - PAE) (AtPAE3)
AT5G12940	8.61266	8.46089	8.50668	8.44386	8.49298	8.23447	8.43462	8.6743	8.79334	8.58379	0.304304	1	0.00109051	Proteins with interaction domains (with proteins or polysaccharides)	LRR protein	expressed protein (LRR domains)
AT1G74000	6.30466	6.07666	6.74657	6.77175	6.68872	6.61055	6.80678	6.69189	6.46204	6.0358	0.307597	1	0.620716	Miscellaneous		strictosidine synthase
AT3G02110	8.11682	8.01426	8.02666	7.7919	8.05352	7.7439	7.60073	7.815	7.84352	7.768	0.312315	1	0.0471576	Proteases	Ser carboxypeptidase	Ser carboxypeptidase (AtSCPL25) (Peptidase family S10.A40, MEROPS)
AT1G29050	7.49009	7.44895	7.4694	7.68232	7.58373	7.54147	7.75684	7.83382	7.75791	7.61489	0.375171	1	0.0932924	Proteins acting on cell wall polysaccharides	GDSL family	homologous to A. thaliana PMR5 (Powdery Mildew Resistant) (carbohydrate acylation)
AT5G20950	8.3403	8.53644	8.60426	8.42566	8.62812	8.46471	8.5679	8.43131	8.4014	8.32785	0.424654	1	0.00961755	Proteins acting on cell wall polysaccharides	glycoside hydrolase (GH)	glycoside hydrolase family 3 - GH3
AT3G12610	6.11308	6.1597	6.10951	6.63711	6.41041	6.08474	6.52866	6.36867	6.43245	6.65119	0.45065	1	0.0047776	Proteins with interaction domains (with proteins or polysaccharides)	LRR protein	expressed protein (LRR domains)
AT2G43530	7.03813	6.95976	7.02826	7.60467	7.21681	7.88091	7.75445	7.33544	7.12268	7.4133	0.468933	1	0.00198697	Miscellaneous		expressed protein (scorpion toxin-like domain, defensin)
AT1G20850	7.8278	7.82673	7.8794	8.02732	7.76541	7.86134	7.78122	8.14891	7.81103	7.89019	0.484784	0.76835	0.00119985	Proteases	Cys protease	Cys protease (cathepsin family) (XCP2, XYLEM CYSTEINE PEPTIDASE 2) (Peptidase family C01.121, MEROPS)
AT2G43050	7.25691	7.22096	7.45664	7.21651	7.57801	7.05104	7.42643	7.4521	7.66656	7.4592	0.485576	1	0.00705424	Proteins acting on cell wall polysaccharides	carbohydrate esterase (CE)	carbohydrate esterase family 8 - CE8 (pectin methylesterase - PME) (AtPME16)
AT2G43620	7.23405	7.49273	6.95203	7.218	7.35884	7.83727	7.68413	7.26705	7.37044	7.21862	0.509454	1	0.00145029	Proteins acting on cell wall polysaccharides	glycoside hydrolase (GH)	glycoside hydrolase family 19 - GH19
AT1G71695	8.37826	8.31461	8.27607	8.19599	8.38177	8.45474	8.35189	7.9952	8.18069	8.1652	0.52458	0.73497	0.0162837	Oxido-reductases	class III peroxidases	peroxidase (AtPrx12)
AT4G31140	7.6691	7.87001	7.92528	7.8237	7.71187	7.92162	7.85245	7.78033	8.0869	8.05205	0.590754	1	0.0667302	Proteins acting on cell wall polysaccharides	glycoside hydrolase (GH)	glycoside hydrolase family 17 - GH17 (beta-1,3-glucosidase)
AT5G49360	7.33079	6.95451	7.53297	7.13626	7.53117	7.07654	6.85263	7.06409	7.19205	6.85058	0.612497	0.779769	0.0360316	Proteins acting on cell wall polysaccharides	glycoside hydrolase (GH)	glycoside hydrolase family 3 - GH3 (beta xylosidase 1) (AtBXL1)
AT4G29240	7.04596	7.3001	6.86353	6.97116	6.9525	7.01447	7.11737	7.33756	7.02814	7.24342	0.638822	0.784458	0.462542	Proteins with interaction domains (with proteins or polysaccharides)	LRR protein	expressed protein (LRR domains)
AT5G42720	6.70284	6.73378	6.8555	6.68149	6.51567	6.38948	6.67981	6.79363	6.50915	6.52326	0.661125	1	0.403309	Proteins acting on cell wall polysaccharides	glycoside hydrolase (GH)	glycoside hydrolase family 17 - GH17 (beta-1,3-glucosidase)
AT1G09750	8.89205	8.83579	8.653	8.46872	8.8282	8.54153	8.61206	8.82524	8.63225	8.81123	0.672237	1	0.000693159	Proteases	Asp protease	Asp protease (pepsin family) (Peptidase family A01.A36, MEROPS)
AT1G61900	7.20242	7.14711	7.19622	6.95125	6.88401	7.02528	6.87673	6.98751	6.95508	7.0309	0.685614	1	0.0272999	Unknown function		expressed protein
AT1G47960	6.86467	6.84852	6.67132	6.95234	6.93533	7.11853	6.87422	6.86426	6.63908	6.49151	0.782556	1	0.287201	Proteins with interaction domains (with proteins or polysaccharides)	pectin methyl esterase inhibitor (PMEI)	plant invertase/pectin methylesterase inhibitor (PMEI) (INH)
AT3G16370	7.48296	7.43946	7.54746	7.2066	7.63145	7.05175	7.77028	7.81845	7.45881	7.72432	0.833974	1	0.0180635	Proteins related to lipid metabolism	GDSL family	lipase acylhydrolase (GDSL family)
AT3G45010	7.36322	7.21891	7.54724	7.41057	7.4467	7.24321	7.36826	7.25095	7.41279	7.14386	0.846553	0.351576	0.423871	Proteases	Ser carboxypeptidase	Ser carboxypeptidase (AtSCPL48) (Peptidase family S10.A46, MEROPS)
AT1G11580	7.90149	7.85066	8.03794	8.32487	7.99904	8.71437	8.36803	8.00456	8.09132	7.87841	0.872583	1	0.000215334	Proteins acting on cell wall polysaccharides	carbohydrate esterase (CE)	carbohydrate esterase family 8 - CE8 (pectin methylesterase - PME) (AtPME18)
AT5G13980	7.69126	7.75405	7.54359	7.40699	7.85034	7.53638	7.57923	7.65292	7.53183	7.47295	0.873963	1	0.0441714	Proteins acting on cell wall polysaccharides	glycoside hydrolase (GH)	glycoside hydrolase family 38 - GH38 (alpha-mannosidase)
AT1G18250	7.54128	7.78093	7.80541	7.71949	7.63354	7.74727	7.43905	7.80849	7.48994	7.66807	0.914044	0.00287021	0.08979	Miscellaneous	thaumatin	thaumatin (PR5, ATLP1)
AT1G06260	6.42265	6	6.2895	6.53017	6.56366	6.46697	5.93058	6.23331	6	6	0.957428	1	0.038112	Proteases	Cys protease	Cys protease (papain family) (Peptidase family C01.A26, MEROPS)
AT1G26820	7.3742	7.01813	7.25513	7.27983	7.2852	7.15595	7.213	7.47865	7.41377	7.22484	1	1	1.35992e-05	Miscellaneous		ribonuclease T2
AT4G28100	7.65927	7.37863	7.4013	7.22886	7.63612	7.35737	7.14007	7.55458	7.40841	7.54966	1	1	2.61334e-05	Unknown function		expressed protein
AT4G15210	7.12841	7.73959	7.48672	7.59002	7.40775	8.13766	8.1478	7.30867	7.70135	7.47161	1	1	4.39776e-05	Proteins acting on cell wall polysaccharides	glycoside hydrolase (GH)	glycoside hydrolase family 14 - GH14
AT3G18080	8.03545	8.25528	8.24703	7.81938	8.25243	7.86449	8.29116	7.81149	8.09758	7.91528	1	0.010747	4.94992e-05	Proteins acting on cell wall polysaccharides	glycoside hydrolase (GH)	glycoside hydrolase family 1 - GH1 (beta-glucosidase) (AtBGLU44)
AT5G15350	7.96748	7.66439	8.09912	7.38734	8.07674	7.53345	7.79882	8.17538	8.14905	7.68941	1	0.0280051	7.41988e-05	Oxido-reductases	blue copper binding protein	early nodulin AtEN22 homologous to blue copper binding protein
AT4G12730	8.33358	7.94398	8.20232	8.00958	8.2093	7.90846	8.06147	8.30595	8.2508	8.29539	1	1	0.000113991	Signaling	fasciclin-like arabinogalactan protein (FLA)	fasciclin-like arabinogalactan protein (FLA2)
AT1G55120	7.67201	7.48587	7.73133	7.51216	7.6597	7.40924	7.33765	7.70001	7.60321	7.39808	1	1	0.000150598	Proteins acting on cell wall polysaccharides	glycoside hydrolase (GH)	glycoside hydrolase family 32 - GH32 (fructosidase/invertase) (AtcwINV3, FRUCT5)
AT2G37870	6.3136	6	6.30586	6.09147	6.09477	6.741	7.36813	6	6	6	1	1	0.00030305	Proteins related to lipid metabolism	lipid transfer protein (LTP)	non-specific lipid transfer protein (AtLTPd6)
AT1G04680	7.80641	8.12554	7.85414	7.45879	7.7069	7.56064	7.69763	7.89945	7.93726	7.71057	1	1	0.00057018	Proteins acting on cell wall polysaccharides	polysaccharide lyase (PL)	polysaccharide lyase family 1 - PL1 (pectate lyase) (AtPLL26)
AT5G23870	6.97904	6	6.50042	6.9334	6.87261	6.508	6.90652	6.98039	6.87433	6.8173	1	1	0.000602031	Proteins acting on cell wall polysaccharides	carbohydrate esterase (CE)	carbohydrate esterase family 13 - CE13 (pectin acylesterase - PAE) (AtPAE9)
AT1G52410	6.63098	6.48334	6.57844	6.64961	6.58772	7.23655	6.95913	6.45301	6.79555	6.33517	1	1	0.000613517	Unknown function		expressed protein
AT3G07010	7.21114	7.64233	7.59396	7.11827	7.59451	7.02113	7.33542	7.41665	7.48723	7.25284	1	1	0.000684244	Proteins acting on cell wall polysaccharides	polysaccharide lyase (PL)	polysaccharide lyase family 1 - PL1 (pectate lyase) (AtPLL20)
AT5G05390	7.504	7.06432	7.20354	7.17015	7.23168	7.40973	7.0568	7.56973	7.46178	7.17467	1	1	0.00134515	Oxido-reductases	laccase	laccase (AtLAC11)
AT4G34980	7.80667	8.25058	8.08157	7.86737	8.00781	7.90769	7.92331	7.95486	7.93085	7.98017	1	1	0.00140938	Proteases	Ser protease	Ser protease (subtilisin) (AtSBT1.6) (Peptidase family S08.A39, MEROPS)
AT2G25060	8.12262	8.13808	8.18412	8.05816	8.15616	8.12322	7.91955	8.20175	8.18341	8.22816	1	1	0.00141251	Oxido-reductases	blue copper binding protein	early nodulin AtEN7 homologous to blue copper binding protein
AT1G33610	7.14967	7.10887	6.96724	7.00683	7.12296	7.34937	7.34089	6.97823	7.21561	7.27172	1	1	0.00181492	Proteins with interaction domains (with proteins or polysaccharides)	LRR protein	expressed protein (LRR domains)
AT5G04885	7.79044	8.33397	7.88381	7.52451	7.55718	7.70372	7.94873	7.83831	7.80349	7.79129	1	1	0.00201084	Proteins acting on cell wall polysaccharides	glycoside hydrolase (GH)	glycoside hydrolase family 3 - GH3
AT4G01610	7.9656	7.97321	7.96839	7.94794	7.86472	8.12772	8.24741	7.81479	8.01311	8.08401	1	1	0.00201478	Proteases	Cys protease	Cys protease (cathepsin B family) (Peptidase family C01.144, MEROPS)
AT4G34480	6.81579	6.82858	6.87415	7.13084	6.92085	7.15098	7.1728	6.86788	6.9452	7.27162	1	1	0.0020933	Proteins acting on cell wall polysaccharides	glycoside hydrolase (GH)	glycoside hydrolase family 17 - GH17 (beta-1,3-glucosidase)
AT2G38080	7.70961	7.39069	7.55758	7.64898	7.46925	7.2666	7.27758	7.53708	7.77222	7.56562	1	1	0.00215818	Oxido-reductases	laccase	laccase (AtLAC4, IRREGULAR XYLEM 12, IRX12)
AT2G43535	6.73103	6.9944	6.67089	7.02293	6.63362	7.26185	7.37887	6.61722	6.76957	6.74637	1	1	0.00246455	Miscellaneous		expressed protein (scorpion toxin-like domain, defensin)
AT2G42800	8.50316	8.36386	8.40505	8.28827	8.44563	8.32119	8.32664	8.54054	8.52844	8.43385	1	1	0.00248714	Proteins with interaction domains (with proteins or polysaccharides)	LRR protein	expressed protein (LRR domains)
AT3G62110	8.1699	7.95495	8.16979	7.95878	8.13756	7.90716	7.97371	8.13037	8.26016	8.06046	1	0.307647	0.00273431	Proteins acting on cell wall polysaccharides	glycoside hydrolase (GH)	glycoside hydrolase family 28 - GH28 (polygalacturonase)
AT5G42100	7.27477	7.50629	7.38564	6.94886	7.38456	7.16722	7.02487	7.41603	7.38674	7.36482	1	1	0.00304383	Proteins acting on cell wall polysaccharides	glycoside hydrolase (GH)	glycoside hydrolase family 17 - GH17 (beta-1,3-glucosidase)
AT4G36945	6.86726	7.08408	6.92048	6.93779	7.25122	7.16914	7.03131	7.1684	7.30169	6.93254	1	1	0.00324654	Proteins related to lipid metabolism		expressed protein (phospholipase C, phosphatidylinositol-specific, X domain)
AT3G08030	9.03276	8.86912	8.90152	8.73144	8.98134	8.73182	8.96548	8.99642	8.79854	8.89336	1	1	0.00327325	Unknown function		expressed protein (DUF642)
AT1G20160	6	6	6.27317	6	6	6.12941	6.75093	6	6	6	1	1	0.004303	Proteases	Ser protease	Ser protease (subtilisin) (AtSBT5.2) (Peptidase family S08.104, MEROPS)
AT5G18470	6.62646	7.1315	6.65923	6.62702	6.8673	6.86605	7.29281	6.866	7.20839	6.95523	1	1	0.00439625	Proteins with interaction domains (with proteins or polysaccharides)	lectin	lectin (curculin-like)
AT3G53980	7.93781	7.85727	8.08132	8.08202	8.16681	8.25324	8.50065	7.92127	8.16386	7.9465	1	1	0.00511749	Proteins related to lipid metabolism	lipid transfer protein (LTP)	non-specific lipid transfer protein (AtLTPd7)
AT3G52720	7.34751	6.72796	7.34719	6.90606	7.2998	6.53935	6.72949	7.02594	6.99064	6.74521	1	0.579303	0.00687267	Miscellaneous		carbonic anhydrase
AT4G23500	7.28939	7.26955	7.28881	7.48069	7.27139	7.53347	7.37401	7.33259	7.38302	7.46072	1	1	0.00698314	Proteins acting on cell wall polysaccharides	glycoside hydrolase (GH)	glycoside hydrolase family 28 - GH28 (polygalacturonase)
AT2G26730	6.55507	6.81862	6.81082	6.79999	6.65347	6.68125	6.66548	6.85844	6.86704	6.71739	1	1	0.00864153	Signaling	LRR-RLK	leucine-rich repeat receptor protein kinase
AT5G45890	6.9282	7.56866	7.01132	7.64414	7.2653	7.32184	7.13024	7.0106	7.24154	7.16455	1	1	0.00876114	Proteases	Cys protease	Cys protease (papain family) (Peptidase family C01.117 MEROPS) (SAG12)
AT2G22420	7.37572	7.72972	7.53552	7.46027	7.32674	7.6449	7.7401	7.37051	7.06354	7.25639	1	1	0.0124506	Oxido-reductases	class III peroxidases	peroxidase (AtPrx17)
AT1G78040	6.96431	6.97589	6.92118	6.91527	6.88652	6.8333	6.56771	7.07144	6.845	6.85342	1	1	0.0140658	Unknown function		expressed protein (Ole e1 allergen domain)
AT4G12420	8.26816	8.13886	8.30425	8.06224	8.33133	8.00683	7.85348	8.11821	8.0901	8.21482	1	1	0.0167678	Oxido-reductases	multicopper oxidase	multicopper oxidase (AtSKU5, SKEWED 5)
AT3G49120	8.684	8.90148	8.52176	8.73012	8.33886	8.93193	8.83063	8.39769	8.65867	8.93577	1	1	0.0170105	Oxido-reductases	class III peroxidases	peroxidase (AtPrx34)
AT4G29700	7.36587	7.19806	6.97386	7.22376	7.04254	7.30284	7.19238	6.8979	7.02694	6.91791	1	1	0.0179416	Miscellaneous		phosphodiesterase
AT4G08780	6.85654	6.79671	6.97363	7.62924	6.95295	7.93869	7.41579	7.37144	7.46012	6.85546	1	1	0.0191397	Oxido-reductases	class III peroxidases	peroxidase (AtPrx38)
AT2G22990	6.98894	6.42314	6.49382	6.61056	6.29607	6.56538	6.3992	6.66292	6.119	6.47958	1	1	0.0191737	Proteases	Ser carboxypeptidase	Ser carboxypeptidase (AtSCPL8) (Peptidase family S10.A10, MEROPS)
AT4G12910	7.68901	7.60493	7.53038	7.77315	7.55386	7.8277	7.69491	7.46702	7.57219	7.54266	1	1	0.0208401	Proteases	Ser carboxypeptidase	Ser carboxypeptidase (SCPL20) (Peptidase family S10.A11, MEROPS)
AT1G17100	7.63682	7.89746	7.74035	7.68759	7.57951	7.72235	7.72188	7.7124	7.70965	7.89292	1	0.691562	0.0212576	Unknown function		expressed protein (SOUL heme-binding domain)
AT3G26720	7.0204	6.76269	6.83313	6.69553	7.00288	6.54042	6.78246	6.98861	6.77678	6.64366	1	1	0.0215952	Proteins acting on cell wall polysaccharides	glycoside hydrolase (GH)	glycoside hydrolase family 38 - GH38 (alpha-mannosidase)
AT2G44300	7.47572	7.49746	7.40071	7.43415	7.57496	7.74514	7.61775	7.63315	7.6662	7.39522	1	1	0.0238803	Proteins related to lipid metabolism	lipid transfer protein (LTP)	non-specific lipid transfer protein (AtLTPg14)
AT2G43580	5.97227	6.0433	6	6	6	6	6.4566	6	6	6	1	1	0.0259013	Proteins acting on cell wall polysaccharides	glycoside hydrolase (GH)	glycoside hydrolase family 19 - GH19
AT1G21670	7.16026	7.25901	7.21434	7.0035	7.26739	7.15889	7.47776	7.23119	7.2732	7.26819	1	1	0.0259865	Unknown function		expressed protein (WD40-like beta propeller domain)
AT5G51480	6.57862	6.58129	6.37089	6.57594	6.55798	6.7185	7.04922	7.1619	6.87263	6.22001	1	1	0.0261081	Oxido-reductases	multicopper oxidase	multicopper oxidase (AtSKS2, homologous to SKU5)
AT2G34810	7.61381	7.43113	7.62662	7.62429	7.63751	7.64936	7.95488	7.47151	7.50366	7.34349	1	0.787035	0.0262213	Oxido-reductases	berberine-bridge oxido-reductase	berberine-bridge enzyme (S)-reticulin:oxygen oxido-reductase
AT1G02335	6.52138	6.4815	6.87012	6.78899	6.91111	6.30127	6.36367	6.93181	6.90562	6.80567	1	1	0.031705	Miscellaneous		germin (subfamily 2 member 2)
AT3G05910	7.74201	7.82358	7.80946	7.65178	7.86176	7.71913	7.66619	7.85176	7.72911	7.73887	1	1	0.0317879	Proteins acting on cell wall polysaccharides	carbohydrate esterase (CE)	carbohydrate esterase family 13 - CE13 (pectin acylesterase - PAE) (AtPAE12)
AT5G15630	6.57951	6.44325	6.64754	6.80898	6.59289	6.45236	6.54931	7.01352	6.87226	6.67537	1	1	0.0324812	Signaling	COBRA-like	COBRA-like (AtCOBL4, IRX6, IRREGULAR XYLEM 6)
AT4G23690	7.89068	7.72862	7.75349	7.60715	7.65209	7.6281	7.60757	7.86101	7.9312	7.78117	1	1	0.0336085	Miscellaneous	dirigent protein	dirigent protein (AtDIR6)
AT4G34260	6.42649	6.58852	6.71016	6.57041	6.64682	6.37683	6.33885	6.52697	6.49911	6.57082	1	1	0.0368179	Proteins acting on cell wall polysaccharides	glycoside hydrolase (GH)	glycoside hydrolase family 65 - GH65 (alpha-L-fucosidase)
AT1G56100	7.77257	7.38332	6.76964	7.55845	7.39396	7.66799	7.37189	6.96888	7.23682	7.28658	1	1	0.03706	Proteins with interaction domains (with proteins or polysaccharides)	pectin methyl esterase inhibitor (PMEI)	pectin methylesterase inhibitor (PMEI)
AT5G20740	7.19203	6.79927	6.97491	7.23886	7.3611	6.80958	6.17566	6.38463	6.49059	6.7287	1	1	0.0381801	Proteins with interaction domains (with proteins or polysaccharides)	pectin methyl esterase inhibitor (PMEI)	plant invertase/pectin methylesterase inhibitor (PMEI) (AtPMEI3)
AT5G34850	8.73575	8.62998	8.70907	8.69769	8.7223	8.5888	8.59219	8.66484	8.58537	8.55011	1	1	0.0389419	Miscellaneous	purple acid phosphatase (PAP)	purple acid phosphatase (AtPAP26)
AT5G64260	6.23261	6.29946	5.86277	6.57116	6.49877	6.55883	6.649	6.40974	6.5564	6.20484	1	1	0.0389984	Miscellaneous		phosphate-induced (phi) protein 1
AT4G08770	6.24178	6.55567	6.63007	7.0165	6.44992	7.02513	6.83973	6.65367	6.64201	6.47297	1	1	0.0421005	Oxido-reductases	class III peroxidases	peroxidase (AtPrx37) (ATP38)
AT1G29670	8.6484	8.61091	8.52158	8.50737	8.64482	8.63464	8.57422	8.7755	8.61858	8.75153	1	0.721946	0.0429291	Proteins related to lipid metabolism	GDSL family	lipase acylhydrolase (GDSL family)
AT5G65730	7.81962	7.67884	7.69651	7.64004	7.67449	7.51986	7.46812	7.80416	7.4421	7.64151	1	1	0.0443633	Proteins acting on cell wall polysaccharides	glycoside hydrolase (GH)	glycoside hydrolase family 16 - GH16 (endoxyloglucan transferase) (At-XTH6)
AT5G19740	7.24869	6.94047	7.15074	6.968	7.10714	6.64697	7.07822	7.15969	7.17011	6.86353	1	0.326403	0.0450504	Proteases	Peptidase family M28	peptidase M28 (peptidase family M28.A02, MEROPS)
AT1G02305	7.99866	7.98873	7.81822	7.94294	7.85483	7.7094	7.71961	7.89629	7.75262	7.80597	1	1	0.048916	Proteases	Cys protease	Cys protease (cathepsin B family) (Peptidase family C01.049, MEROPS)
AT2G35780	6.93422	6.7422	6.91549	6.38073	6.89007	6.39195	6.34333	6.68856	6.57306	6.45118	1	1	0.0498832	Proteases	Ser carboxypeptidase	Ser carboxypeptidase (AtSCPL26) (Peptidase family S10.A43, MEROPS)
AT1G01900	7.90205	7.89674	7.96644	7.81806	7.77757	7.69183	7.69068	7.85611	7.82869	7.88031	1	1	0.0519634	Proteases	Ser protease	Ser protease (subtilisin) (AtSBT1.1) (Peptidase family S08.112, MEROPS)
AT2G45470	8.18584	8.02042	8.30947	8.28283	8.27195	8.30195	8.21467	8.47053	8.28423	8.51849	1	1	0.0538911	Signaling	fasciclin-like arabinogalactan protein (FLA)	fasciclin-like arabinogalactan protein (FLA8)
AT5G67360	8.33979	8.43408	8.46269	8.51704	8.21336	8.47782	8.33154	8.25259	8.33697	8.29421	1	1	0.0568851	Proteases	Ser protease	Ser protease (subtilisin) (AtSBT1.7, ARA12) (Peptidase family S08.112, MEROPS)
AT5G08260	7.21072	7.59705	7.4984	7.32312	7.28198	7.3385	7.36357	7.18735	7.29987	7.398	1	1	0.0569189	Proteases	Ser carboxypeptidase	Ser carboxypeptidase (AtSCPL35) (Peptidase family, S10.A34, MEROPS)
AT5G33370	7.30014	7.55946	7.48553	7.18438	7.45176	6.94662	7.23541	6.69353	7.59493	7.10973	1	1	0.0605208	Proteins related to lipid metabolism	GDSL family	lipase acylhydrolase (GDSL family)
AT1G11820	7.18564	7.4364	7.4074	7.35506	7.10854	7.53863	7.32618	7.35109	7.60031	7.62274	1	1	0.066719	Proteins acting on cell wall polysaccharides	glycoside hydrolase (GH)	glycoside hydrolase family 17 - GH17 (beta-1,3-glucosidase)
AT3G28220	6.84217	6.66038	6.61001	6.83175	6.41969	7.00693	7.05913	6.53496	6.28438	6.27959	1	1	0.0704216	Unknown function		expressed protein (MATH domain)
AT5G58300	7.10608	7.16629	7.17077	7.22206	7.01385	7.22778	6.74047	7.18327	7.04942	7.18154	1	0.428139	0.0740688	Signaling	LRR-RLK	leucine-rich repeat receptor protein kinase
AT4G01700	7.16669	7.83065	7.27436	7.41401	7.37727	7.6591	7.42999	7.49916	7.2824	7.76044	1	0.0547457	0.0820571	Proteins acting on cell wall polysaccharides	glycoside hydrolase (GH)	glycoside hydrolase family 19 - GH19
AT2G04570	6.79163	7.29241	6.91693	7.14573	6.8862	6.93253	6.98295	6.5924	6.6811	6.47297	1	1	0.0827993	Proteins related to lipid metabolism	GDSL family	lipase acylhydrolase (GDSL family)
AT3G07320	8.11267	8.36884	8.39653	8.3019	8.17999	8.23616	8.22317	8.39172	8.23544	8.35353	1	0.251132	0.0845974	Proteins acting on cell wall polysaccharides	glycoside hydrolase (GH)	glycoside hydrolase family 17 - GH17 (beta-1,3-glucosidase)
AT5G47550	6.63854	6.95118	6.36764	6.72538	6.44581	6.63502	6.7018	6.47824	6.51365	6.59986	1	1	0.0878398	Proteins with interaction domains (with proteins or polysaccharides)	protease inhibitor	proteinase inhibitor family I25 (phytostatin) (cystatin family, I25.033, MEROPS) (AtCYS-5)
AT5G21100	7.12296	6.80283	7.10716	6.49124	7.13404	6.34082	6.91996	6.82232	6.7991	6.74484	1	0.21805	0.0914699	Oxido-reductases	multicopper oxidase	multicopper oxidase
AT3G18490	8.25851	8.10041	8.1151	8.04589	8.05183	7.96191	8.2108	8.24932	8.2068	8.2447	1	1	0.101339	Proteases	Asp protease	Asp protease (pepsin family) (Peptidase family A01.A09, MEROPS) (ASPG1, ASPARTIC PROTEASE IN GUARD CELL 1)
AT3G06035	6.54021	6.91003	6.66947	7.17132	6.96366	6.71808	7.27108	7.23798	7.00402	7.00373	1	1	0.103736	Unknown function		expressed protein
AT3G25700	7.14095	7.31292	7.54541	7.24889	7.39942	7.43095	7.23991	7.16943	7.5245	7.07483	1	1	0.10729	Proteases	Asp protease	Asp protease (pepsin family) (Peptidase family A01.A11, MEROPS)
AT2G27190	7.61499	7.4878	7.55081	7.34399	7.56625	7.46899	7.39055	7.5027	7.46011	7.4243	1	1	0.107503	Miscellaneous	purple acid phosphatase (PAP)	purple acid phosphatase (AtPAP12)
AT1G54000	7.14553	7.31207	7.03817	7.10834	6.97683	7.22702	7.23167	7.14583	6.90209	7.14698	1	1	0.111387	Proteins related to lipid metabolism	GDSL family	lipase acylhydrolase (GDSL family)
AT1G31550	6.57149	7.31739	6.5833	7.1004	6.2819	7.18807	6.55879	6.63578	6.67844	6.9452	1	0.120993	0.113342	Proteins related to lipid metabolism	GDSL family	lipase acylhydrolase (GDSL family)
AT1G11910	6.22276	6.4098	6.45767	6.61617	6.43772	6.4735	6.38855	6	6.06742	6	1	1	0.114285	Proteases	Asp protease	Asp protease (subfamily S9B unassigned peptidases, MEROPS)
AT1G47128	8.06824	7.82409	8.09954	8.06052	8.09723	8.06084	8.12187	8.0179	8.18189	8.01683	1	0.00723724	0.114482	Proteases	Cys protease	Cys protease (papain family) (Peptidase family C01.064) (RD21A)
AT3G10450	7.1278	6.765	7.02299	6.79002	7.16034	6.79584	7.02186	6.7406	6.97681	7.04975	1	0.377433	0.115028	Proteases	Ser carboxypeptidase	Ser carboxypeptidase (AtSCPL7) (Peptidase family S10.A15, MEROPS)
AT2G33530	6.6256	7.28792	6.9483	6.85799	6.83191	6.85722	6.76131	6.64152	6.96642	6.97475	1	1	0.115975	Proteases	Ser carboxypeptidase	Ser carboxypeptidase (AtSCPL46) (Peptidase family, S10.A42, MEROPS)
AT2G34930	6.81666	6.5938	6.70277	7.05229	7.01642	7.19935	7.25271	6.97214	6.91012	6.7241	1	1	0.11715	Proteins with interaction domains (with proteins or polysaccharides)	LRR protein	expressed protein (LRR domains)
AT1G05260	7.11413	6.9513	7.09588	7.03007	7.31868	7.32809	7.402	6.84427	7.15901	7.01203	1	1	0.122135	Oxido-reductases	class III peroxidases	peroxidase (AtPrx03)
AT5G42240	8.02306	8.07028	8.15682	7.94793	8.13176	8.06938	8.15934	8.16839	8.01097	8.10638	1	1	0.124442	Proteases	Ser carboxypeptidase	Ser carboxypeptidase (AtSCPL42) (Peptidase family S10.A21, MEROPS)
AT1G77700	6.48102	6.28764	6.47884	6.62271	6.49486	6.40647	6.34606	6.58878	6.65016	6.49487	1	1	0.126905	Miscellaneous	thaumatin	thaumatin (PR5)
AT5G65760	7.63353	7.91047	7.80179	7.7968	7.7251	8.04696	7.81245	7.7317	7.88792	7.84211	1	1	0.130932	Proteases	peptidase family S28	Pro-Xaa carboxypeptidase (Peptidase family S28.A02, MEROPS)
AT1G26770	6.134	6.37121	6.23505	6.48065	6.25075	6.59518	6.37754	6.14589	6.31893	6.11895	1	1	0.132717	Proteins acting on cell wall polysaccharides	expansin	alpha-expansin (AtEXPA10)
AT2G17230	5.98828	6.31523	6.30868	6.44818	6.08461	6.508	6.29495	6.32838	5.99671	6	1	1	0.134959	Miscellaneous		phosphate-induced (phi) protein 1
AT3G08770	8.20819	7.98802	7.86281	8.05705	8.16422	7.96007	7.45848	7.89013	7.70583	7.753	1	1	0.138265	Proteins related to lipid metabolism	lipid transfer protein (LTP)	non-specific lipid transfer protein (AtLTP1.6, AtLTP6)
AT4G19410	7.95485	8.05114	8.03813	7.67109	8.01057	7.95489	7.86734	7.71596	8.02342	7.85449	1	1	0.1385	Proteins acting on cell wall polysaccharides	carbohydrate esterase (CE)	carbohydrate esterase family 13 - CE13 (pectin acylesterase - PAE) (AtPAE7)
AT5G62350	8.17098	8.11071	8.08923	8.05651	8.23007	8.29549	8.14382	8.29115	8.04026	8.21574	1	1	0.140725	Proteins with interaction domains (with proteins or polysaccharides)	pectin methyl esterase inhibitor (PMEI)	plant invertase/pectin methylesterase inhibitor (PMEI-like)
AT4G39090	6.69354	7.12406	6.63748	6.97643	6.8079	7.24774	7.11643	7.03356	6.72958	6.78862	1	1	0.142862	Proteases	Cys protease	Cys protease (cathepsin family)
AT2G45180	8.1398	7.57991	8.05941	7.36256	7.74702	6.59437	7.54804	7.78384	7.62567	7.46154	1	1	0.143748	Proteins related to lipid metabolism	lipid transfer protein (LTP)	homologous to non-specific lipid transfer protein
AT4G35350	7.37908	7.15073	7.56357	7.4805	7.31826	7.55064	7.21806	7.3241	7.43219	7.26211	1	1	0.147985	Proteases	Cys protease	Cys protease (cathepsin family)
AT5G23820	6	6.06998	6.28879	6.3012	6.06194	6.60633	6.5862	6.37536	6	6.43724	1	1	0.148114	Proteins related to lipid metabolism		expressed protein (MD-2-related lipid-recognition (ML) domain)
AT3G44100	8.30422	8.2436	8.03403	8.04756	7.99309	8.21024	8.15124	8.08004	8.20677	8.11971	1	1	0.151429	Proteins related to lipid metabolism		expressed protein (MD-2-related lipid-recognition (ML) domain)
AT1G69530	7.12535	6.21076	6.76288	6.82845	6.78664	6.508	7.03189	6.6481	6.58403	6.47297	1	1	0.151551	Proteins acting on cell wall polysaccharides	expansin	alpha-expansin (ATHEXP ALPHA 1.2) (AtEXPA1)
AT3G62020	7.72614	6.96653	7.55081	7.42537	6.74875	7.28015	7.07952	7.0943	7.18069	6.74301	1	1	0.152633	Miscellaneous		germin (subfamily 2 member 4, GLP10)
AT3G26380	7.96115	7.88089	7.89794	7.87933	7.9689	7.95254	7.97843	7.91516	7.9234	7.95627	1	1	0.152638	Proteins acting on cell wall polysaccharides	glycoside hydrolase (GH)	glycoside hydrolase family 27 - GH27 (alpha-galactosidase/melibiase)
AT5G48900	6.63318	6.76391	6.86312	6.70671	6.53794	6.83084	6.66933	6.64931	6.83771	6.64076	1	1	0.163819	Proteins acting on cell wall polysaccharides	polysaccharide lyase (PL)	polysaccharide lyase family 1 - PL1 (pectate lyase) (AtPLL21)
AT1G73620	7.21144	7.19327	6.95877	6.99391	6.94906	7.00468	7.08821	7.1508	7.12724	7.00555	1	1	0.166228	Miscellaneous	thaumatin	thaumatin (PR5)
AT4G11190	6.18283	6.69261	6.88459	6.92232	6.62733	7.06487	6.37203	6.61996	6.7147	6.5069	1	1	0.168586	Miscellaneous	dirigent protein	dirigent protein (AtDIR13)
AT5G13140	7.19919	7.30626	7.38656	7.16839	7.16007	7.37207	7.2991	7.18562	7.4362	6.97602	1	1	0.174334	Unknown function		expressed protein (Ole e1 allergen domain)
AT1G01300	7.79281	7.84152	8.16367	7.69442	8.0097	7.73532	7.59645	7.74294	7.88544	7.65355	1	1	0.174684	Proteases	Asp protease	Asp protease (pepsin family) (Peptidase family A01.A05, MEROPS)
AT4G21585	6.77995	7.03225	6.84673	6.80444	6.69368	6.96445	6.70223	6.61307	6.74566	6.97526	1	1	0.17577	Proteins related to lipid metabolism		phospholipase C/P1 nuclease
AT1G55265	6.55348	6.74523	6.675	6.79144	6.6144	6.27714	6.80385	6.47722	6.89363	6.63066	1	1	0.177448	Unknown function		expressed protein (DUF538)
AT3G05730	7.41011	7.49673	6.58241	6.61617	6.83652	7.1094	7.43043	6.89341	7.2916	7.24776	1	1	0.178573	Unknown function		expressed protein
AT3G45970	7.88574	7.6267	7.88096	7.86995	7.97095	7.848	7.84884	7.87435	7.78556	7.57393	1	1	0.17894	Proteins acting on cell wall polysaccharides	expansin	expansin-like A (ATHEXP BETA 2.1) (AtEXLA1)
AT4G29360	6.76242	6.33887	6.95736	6.91322	6.85466	6.91529	6.82712	7.01068	6.95779	7.12056	1	1	0.179275	Proteins acting on cell wall polysaccharides	glycoside hydrolase (GH)	glycoside hydrolase family 17 - GH17 (beta-1,3-glucosidase)
AT5G62210	7.31409	7.74762	7.46867	7.79014	7.32091	7.53228	7.33154	7.52907	7.3602	7.55876	1	0.000142146	0.181348	Proteins related to lipid metabolism		expressed protein (lipase/lipooxygenase domain, PLAT/LH2)
AT2G27920	7.95657	7.75744	7.59918	7.66892	7.70164	7.60054	7.76163	7.72943	7.66905	7.53788	1	1	0.183073	Proteases	Ser carboxypeptidase	Ser carboxypeptidase (AtSCPL51) (Peptidase family S10.017, MEROPS)
AT5G58090	6.90992	7.21917	7.39094	7.1365	7.09044	7.27575	7.285	7.00722	7.48754	7.53288	1	1	0.183494	Proteins acting on cell wall polysaccharides	glycoside hydrolase (GH)	glycoside hydrolase family 17 - GH17 (beta-1,3-glucosidase)
AT4G30270	8.0896	7.77171	8.03414	7.57463	8.13162	7.52959	8.08661	8.0751	8.28442	8.0962	1	1	0.183576	Proteins acting on cell wall polysaccharides	glycoside hydrolase (GH)	glycoside hydrolase family 16 - GH16 (endoxyloglucan transferase) (meri-5) (At-XTH24)
AT4G08950	7.25003	7.40941	7.28583	7.04579	7.37745	7.19917	6.96737	6.95202	7.09014	7.17638	1	1	0.186203	Miscellaneous		phosphate-induced (phi) protein 1
AT2G13820	6.46646	6.60511	6.52785	6.66593	6.55716	6.508	6.42477	6.64202	6.68322	6.47297	1	1	0.186527	Proteins related to lipid metabolism	lipid transfer protein (LTP)	non-specific lipid transfer protein (AtLTPg11)
AT3G10410	7.61152	7.65	7.67763	7.50697	7.6931	7.39691	7.56744	7.56288	7.44742	7.45814	1	1	0.198074	Proteases	Ser carboxypeptidase	Ser carboxypeptidase (AtSCPL49) (Peptidase family S10.A45, MEROPS)
AT1G66250	7.05715	7.18232	7.13269	6.8723	7.15364	7.01845	7.24303	6.83944	7.37489	7.28855	1	1	0.204362	Proteins acting on cell wall polysaccharides	glycoside hydrolase (GH)	glycoside hydrolase family 17 - GH17 (beta-1,3-glucosidase)
AT4G15750	7.08414	7.11583	6.70688	6.84405	7.21441	7.00982	7.20802	6.72283	6.85858	7.08095	1	1	0.20542	Proteins with interaction domains (with proteins or polysaccharides)	pectin methyl esterase inhibitor (PMEI)	plant invertase/pectin methylesterase inhibitor (PMEI-like)
AT1G29660	6.49159	6.50589	6.35861	6.66958	6.13931	6.508	6.56229	6.30008	6.47014	6.52492	1	1	0.207749	Proteins related to lipid metabolism	GDSL family	lipase acylhydrolase (GDSL family)
AT5G51950	7.28576	7.51809	7.10643	7.35176	7.16983	7.01845	7.1764	7.42965	7.08262	7.42838	1	0.00189723	0.208515	Oxido-reductases		expressed protein (GMC oxido-reductase domain)
AT3G14920	7.35211	7.28602	7.44744	7.27545	7.46274	7.33485	7.35597	7.39241	7.4623	7.31464	1	1	0.209909	Proteins acting on cell wall polysaccharides	PNGase A	Peptide-N4-(N-acetyl-beta-glucosaminyl) asparagine amidase A
AT4G02290	7.21217	7.05058	7.09211	7.00541	6.89333	6.86962	7.02804	6.59287	7.22721	6.33349	1	1	0.210638	Proteins acting on cell wall polysaccharides	glycoside hydrolase (GH)	glycoside hydrolase family 9 - GH9 (endo-1,3(4)-beta-glucanase)
AT2G17120	7.68664	8.04808	7.58738	7.72378	7.63391	7.81641	7.96535	7.72849	8.04657	7.98807	1	1	0.21158	Proteins with interaction domains (with proteins or polysaccharides)		expressed protein (LysM domain)
AT3G55260	8.38529	8.3055	8.31571	8.33601	8.42857	8.27075	8.52388	8.35203	8.35928	8.28974	1	1	0.213776	Proteins acting on cell wall polysaccharides	glycoside hydrolase (GH)	glycoside hydrolase family 20 - GH20 (N-acetyl-beta-glucosaminidase)
AT4G22010	7.70665	7.72912	7.88045	7.84877	7.88447	7.58837	7.6928	7.66468	7.73745	7.58641	1	1	0.225094	Oxido-reductases	multicopper oxidase	multicopper oxidase (AtSKS4, homologous to SKU5)
AT3G09410	7.05694	6.99746	7.1884	6.70406	7.13257	6.85144	6.6832	6.67228	7.0336	6.99754	1	1	0.226642	Proteins acting on cell wall polysaccharides	carbohydrate esterase (CE)	carbohydrate esterase family 13 - CE13 (pectin acylesterase - PAE) (AtPAE5)
AT5G11420	8.68658	7.54401	8.73957	8.51337	8.26668	8.48672	8.64431	8.44447	8.69215	8.52258	1	1	0.235886	Unknown function		expressed protein (DUF642)
AT3G13560	7.74633	7.92486	7.8948	7.73018	7.87224	7.82464	7.79364	7.90546	8.01162	7.89053	1	1	0.2389	Proteins acting on cell wall polysaccharides	glycoside hydrolase (GH)	glycoside hydrolase family 17 - GH17 (beta-1,3-glucosidase)
AT1G74210	7.41009	7.32317	7.34765	7.32436	7.51805	7.28924	7.21331	7.2669	7.2041	7.10604	1	1	0.242112	Proteins related to lipid metabolism		glycerophosphoryl diester phosphodiesterase (GDPD5)
AT5G11720	7.37663	7.16578	7.26022	7.19669	7.2895	7.11322	7.20394	7.24862	7.10852	7.05699	1	1	0.244636	Proteins acting on cell wall polysaccharides	glycoside hydrolase (GH)	glycoside hydrolase family 31 - GH31 (alpha-glucosidase) (AGLU1)
AT4G30290	6.11326	6	6.32654	6.51356	6.38218	6.54353	6.17578	6.48064	6.24223	6.47297	1	1	0.244639	Proteins acting on cell wall polysaccharides	glycoside hydrolase (GH)	glycoside hydrolase family 16 - GH16 (endoxyloglucan transferase) (At-XTH19)
AT1G28290	8.835	8.90586	8.92653	8.97491	8.65681	8.59402	8.68452	8.8583	8.755	8.90986	1	1	0.256241	Structural proteins	proline-rich protein (PRP)	AGP/proline-rich protein (AtAGP31)
AT5G20630	7.64724	7.47864	7.46365	7.62297	7.35584	7.38144	7.53631	7.56771	7.14094	7.54418	1	1	0.258363	Miscellaneous		germin (AtGER3, GLP2, GLP3)
AT1G09010	7.20461	7.30175	7.24031	7.18852	7.27071	7.23091	7.32083	7.17517	7.21819	7.21029	1	1	0.26501	Proteins acting on cell wall polysaccharides	glycoside hydrolase (GH)	glycoside hydrolase family 2 - GH2
AT3G20820	9.01169	8.91331	8.87812	9.00356	8.99442	8.96715	8.90039	8.92122	8.92854	8.89783	1	1	0.269996	Proteins with interaction domains (with proteins or polysaccharides)	LRR protein	expressed protein (LRR domains)
AT1G57590	7.05495	6.84642	7.08507	6.97397	6.84968	6.484	7.1539	6.90959	6.93991	6.80807	1	1	0.270416	Proteins acting on cell wall polysaccharides	carbohydrate esterase (CE)	carbohydrate esterase family 13 - CE13 (pectin acylesterase - PAE) (AtPAE2)
AT3G13990	6.54306	6.51225	6.5603	6.64806	6.39528	6.59675	6.38423	6.73816	6.57409	6.87336	1	1	0.271429	Oxido-reductases	multicopper oxidase	multicopper oxidase (AtSKS11, homologous to SKU5)
AT5G07030	9.59623	9.73145	9.57885	9.62167	9.57775	9.55846	9.58952	9.74314	9.67738	9.6431	1	1	0.273015	Proteases	Asp protease	Asp protease (pepsin family) (Peptidase family A01.A54, MEROPS)
AT1G55210	6.95035	6.86399	6.73737	7.18392	6.6747	6.508	7.36924	6.76526	6.4715	6.54113	1	1	0.284346	Miscellaneous	dirigent protein	dirigent protein (AtDIR20)
AT5G25090	7.72422	7.70042	7.72562	7.68563	7.7231	7.73917	7.57895	7.75183	7.69869	7.63391	1	1	0.284691	Oxido-reductases	blue copper binding protein	early nodulin AtEN6 homologous to blue copper binding protein
AT5G03170	7.1664	6.86384	7.28386	7.20336	6.7281	7.31601	7.25322	7.44145	7.57981	7.62211	1	1	0.290204	Signaling	fasciclin-like arabinogalactan protein (FLA)	fasciclin-like arabinogalactan protein (FLA11)
AT4G32940	6.5442	6.54501	6.40718	6.76989	6.5387	6.508	6.46695	6.62826	6.66245	6.47297	1	1	0.291725	Proteases	Cys protease	peptidase C13 (legumain family) (peptidase family C13.006, MEROPS)
AT5G14450	6.89322	6.81447	6.9095	6.41668	6.78544	6.48463	6.75637	6.92392	6.76458	6.33084	1	1	0.293698	Proteins related to lipid metabolism	GDSL family	lipase acylhydrolase (GDSL family)
AT5G56590	7.71812	7.66312	7.67604	7.60872	7.69056	7.56522	7.69828	7.82299	7.65826	7.62616	1	1	0.302973	Proteins acting on cell wall polysaccharides	glycoside hydrolase (GH)	glycoside hydrolase family 17 - GH17 (beta-1,3-glucosidase)
AT3G17840	6.36996	6.80485	6.40718	6.61617	6.6591	6.68049	6.46695	6.6744	6.72633	6.47297	1	1	0.311471	Signaling	LRR-RLK	leucine-rich repeat receptor protein kinase
AT1G78830	8.48293	8.3101	8.38891	8.38292	8.36848	8.26718	8.38188	8.37999	8.4663	8.38613	1	1	0.319946	Proteins with interaction domains (with proteins or polysaccharides)	lectin	lectin (curculin-like)
AT1G28580	6.37243	6.87629	6.34635	6	6.40078	6.67198	6.60979	6.65072	6.88449	6.95464	1	1	0.321971	Proteins related to lipid metabolism	GDSL family	lipase acylhydrolase (GDSL family)
AT2G28790	8.9993	9.0252	9.07102	9.38549	9.08024	9.12589	9.08814	9.09995	9.11818	9.11396	1	1	0.322117	Miscellaneous	thaumatin	thaumatin (PR5)
AT5G59845	7.2003	7.05347	7.24969	7.42612	7.1103	7.20342	7.35351	7.32944	7.11729	6.72479	1	1	0.333751	Miscellaneous	gibberellic acid-stimulated Arabidopsis (GASA) protein	gibberellic acid-stimulated Arabidopsis (AtGASA10) protein
AT3G14067	7.67175	7.65975	7.70251	7.56424	7.60369	7.66318	7.6626	7.57585	7.64008	7.63765	1	1	0.33633	Proteases	Ser protease	Ser protease (subtilisin) (AtSBT1.4) (Peptidase family S08.A28, MEROPS)
AT2G20750	6.72468	7.15425	6.79707	6.83836	6.56866	6.81042	6.9168	7.1525	6.93428	6.98997	1	1	0.347367	Proteins acting on cell wall polysaccharides	expansin	beta-expansin (AtEXPB1)
AT5G55730	8.20136	8.31673	8.16104	8.28824	8.11835	8.37511	8.10113	8.30022	8.4482	8.41559	1	1	0.349444	Signaling	fasciclin-like arabinogalactan protein (FLA)	fasciclin-like arabinogalactan protein (FLA1)
AT4G27520	7.71987	8.08217	8.20206	8.32227	8.05832	8.28228	8.13225	8.1051	8.09752	8.2873	1	1	0.355801	Oxido-reductases	blue copper binding protein	early nodulin AtEN12 homologous to blue copper binding protein
AT1G22480	6.45151	6.52018	6.50715	6.71056	6.44881	6.52552	6.67001	6.59309	6.99449	6.69167	1	1	0.36325	Oxido-reductases	blue copper binding protein	uclacyanin AtUCC7 (blue copper binding protein)
AT4G33220	7.29239	7.17875	7.21498	6.99914	6.98188	7.14502	6.85872	7.13243	7.16623	7.27382	1	1	0.373079	Proteins acting on cell wall polysaccharides	carbohydrate esterase (CE)	carbohydrate esterase family 8 - CE8 (pectin methylesterase - PME) (AtPME44)
AT5G03610	7.32428	7.36977	7.28017	6.98868	7.28158	7.24477	7.34555	7.43185	7.2851	7.41019	1	1	0.378231	Proteins related to lipid metabolism	GDSL family	lipase acylhydrolase (GDSL family)
AT3G61490	7.36263	7.35693	7.23583	7.42242	7.3921	7.41776	7.16805	7.39632	7.12133	7.21227	1	1	0.394248	Proteins acting on cell wall polysaccharides	glycoside hydrolase (GH)	glycoside hydrolase family 28 - GH28 (polygalacturonase)
AT5G21090	7.03097	7.13565	7.12725	7.08005	7.09039	7.17622	7.17848	7.18282	7.25776	7.23488	1	1	0.39761	Proteins with interaction domains (with proteins or polysaccharides)	LRR protein	expressed protein (LRR domains)
AT5G55480	7.49319	7.49281	7.49954	7.5355	7.48604	7.53622	7.2156	7.38907	7.55083	7.49052	1	1	0.398232	Proteins related to lipid metabolism		glycerophosphoryl diester phosphodiesterase (GDPDL4, GPDL1)
AT5G45280	8.05088	8.19612	7.69054	7.72547	7.78731	7.87896	7.87688	7.7289	7.9251	7.90327	1	1	0.402566	Proteins acting on cell wall polysaccharides	carbohydrate esterase (CE)	carbohydrate esterase family 13 - CE13 (pectin acylesterase - PAE) (AtPAE11)
AT1G05835	7.51156	7.47036	7.50291	7.21644	7.46532	7.47051	6.89417	7.45183	7.27436	7.06665	1	1	0.404628	Unknown function		expressed protein
AT4G26690	7.30444	7.39345	7.45644	7.50411	7.37329	7.41975	7.42825	7.54719	7.57963	7.51794	1	1	0.405705	Proteins related to lipid metabolism		glycerophosphoryl diester phosphodiesterase (GDPDL3, GDPL2) (MRH5/SHV3, MORPHOGENESIS OF ROOT HAIR 5)
AT3G23450	8.18964	8.12283	7.83483	8.07412	7.63422	7.89664	7.72549	8.21859	7.92343	7.41272	1	1	0.406488	Unknown function		expressed protein
AT5G39570	7.93149	7.9012	7.9477	7.9879	7.84134	7.95111	7.88348	8.07317	7.91911	7.96362	1	1	0.406514	Unknown function		expressed protein
AT4G37520	6.46117	6.02585	6.38279	6	6.45146	6.13478	6.56046	6.39125	6.17902	6.15218	1	1	0.406653	Oxido-reductases	class III peroxidases	peroxidase (AtPrx50)
AT1G76160	8.27916	8.2782	8.34797	8.40835	8.29185	8.24165	8.21606	8.29682	8.3122	8.2531	1	1	0.410775	Oxido-reductases	multicopper oxidase	multicopper oxidase (AtSKS5, homologous to SKU5)
AT5G25460	8.77303	8.54924	8.85595	8.79544	8.39167	8.48389	8.51961	8.73032	8.55269	8.20408	1	1	0.419072	Unknown function		expressed protein (DUF642)
AT4G35220	7.23275	6.97017	7.08677	7.01771	7.12567	6.80234	7.15447	7.07671	6.99587	6.87773	1	1	0.425746	Unknown function		expressed protein (cyclase domain)
AT5G47350	6.49892	6.5466	6.0874	6.61617	6.44311	6.56162	6.48654	6.58128	6.2948	6.46437	1	1	0.428681	Proteins related to lipid metabolism		palmitoyl protein thioesterase
AT1G26560	7.0253	6.98683	7.0067	6.49286	7.05146	6.51508	7.05497	6.73331	6.86938	6.6816	1	0.253309	0.437441	Proteins acting on cell wall polysaccharides	glycoside hydrolase (GH)	glycoside hydrolase family 1 - GH1 (beta-glucosidase) (AtBGLU40)
AT2G02130	6.52405	6.60128	6.80235	6.51674	7.00514	6.72697	6.90934	6.57738	6.98056	6.61704	1	1	0.439531	Miscellaneous		Low-molecular-weight Cysteine-Rich protein 68 (LCR68)/Defensin-like protein 1
AT2G43550	7.22787	6.54501	6.31123	6.61617	6.42788	7.06363	6.46695	6.28583	6.57574	6.92982	1	1	0.447333	Miscellaneous		expressed protein (scorpion toxin-like domain, defensin)
AT4G30810	7.2454	6.95971	7.31707	7.01196	7.19761	7.03792	7.12127	7.06807	7.15878	7.00642	1	0.729172	0.448973	Proteases	Ser carboxypeptidase	Ser carboxypeptidase (AtSCPL29) (Peptidase family S10.A32, MEROPS)
AT5G14920	8.43538	8.36128	8.41825	8.43615	8.41599	8.48768	8.2286	8.48232	8.46172	8.3531	1	1	0.449958	Miscellaneous	gibberellic acid-stimulated Arabidopsis (GASA) protein	gibberellic acid-stimulated Arabidopsis (AtGASA14) protein
AT3G45940	6	6	6.25754	6.5703	6.539	6.33806	6.37383	6.73769	6.64433	7.07426	1	1	0.464997	Proteins acting on cell wall polysaccharides	glycoside hydrolase (GH)	glycoside hydrolase family 31 - GH31 (alpha-glucosidase)
AT3G54400	8.95632	8.88519	8.87582	8.75565	8.75693	8.93421	8.99039	9.04401	8.98367	8.85772	1	1	0.46516	Proteases	Asp protease	Asp protease (pepsin family) (Peptidase family A01.A48, MEROPS)
AT4G38400	7.79213	7.79965	7.82688	7.6177	7.72267	7.47779	7.51082	7.66847	7.44823	7.7202	1	1	0.474129	Proteins acting on cell wall polysaccharides	expansin	expansin-like A (ATHEXP BETA 2.2) (AtEXLA2)
AT1G33811	6.81351	6.64171	6.51003	6.11059	6.66007	6.29603	6.58081	6.64868	6.51971	6.36519	1	1	0.488836	Proteins related to lipid metabolism	GDSL family	lipase acylhydrolase (GDSL family)
AT4G25240	7.15778	7.11716	7.11753	7.03826	7.10099	7.03151	6.96886	7.09789	7.16128	7.22636	1	1	0.501433	Oxido-reductases	multicopper oxidase	multicopper oxidase (AtSKS1, homologous to SKU5)
AT4G12960	8.09867	7.82072	7.53948	7.98189	7.5681	7.97538	7.60527	7.5873	7.76044	7.85897	1	1	0.509297	Oxido-reductases		thiol reductase (GILT family)
AT3G05180	7.48021	7.36878	7.44022	7.32465	7.42613	7.32741	7.48469	7.29267	7.51174	7.49956	1	1	0.525745	Proteins related to lipid metabolism	GDSL family	lipase acylhydrolase (GDSL family)
AT3G20570	7.20087	7.13059	7.38343	6.83362	7.34165	6.86571	7.28446	7.23841	7.10941	7.20598	1	1	0.527673	Oxido-reductases	blue copper binding protein	early nodulin AtEN14 homologous to blue copper binding protein
AT1G71950	7.81561	7.9279	7.70977	7.70658	7.68854	7.79921	7.93619	7.78274	7.96038	8.03122	1	1	0.532193	Proteins with interaction domains (with proteins or polysaccharides)	protease inhibitor	inhibitor family I9 (unassigned peptidase inhibitors, MEROPS)
AT1G02180	6.42265	6.55036	6.52234	6.74618	6.55571	6.60796	6.51748	6.45584	6.52321	6.47297	1	1	0.532762	Unknown function		expressed protein
AT3G59010	7.45626	7.68221	7.64183	7.97523	7.56071	7.62155	7.81332	8.11703	7.98901	7.92632	1	1	0.53468	Proteins acting on cell wall polysaccharides	carbohydrate esterase (CE)	carbohydrate esterase family 8 - CE8 (pectin methylesterase - PME) (AtPME35)
AT4G31840	7.81958	7.9535	7.90815	8.10766	7.70571	8.03217	7.9234	7.97077	7.86851	8.03276	1	0.985413	0.534768	Oxido-reductases	blue copper binding protein	early nodulin AtEN13 homologous to blue copper binding protein
AT3G24480	7.05328	6.81828	6.93328	6.94996	6.66147	6.75385	6.93469	6.7995	6.81967	6.81544	1	1	0.538186	Structural proteins	leucine-rich repeat extensin (LRX)	LRR-extensin (AtLRX4)
AT1G28110	6.31456	6.6135	6.53725	6.55283	6.35147	6.50462	6.38058	6.43332	6.30567	6.59171	1	1	0.540666	Proteases	Ser carboxypeptidase	Ser carboxypeptidase (AtSCPL45) (Peptidase family S10.A24, MEROPS)
AT4G32460	7.79803	7.74772	7.91843	7.92767	7.76506	7.82574	7.93108	7.84586	7.78631	7.87207	1	1	0.546855	Unknown function		expressed protein (DUF642)
AT5G09440	7.6886	7.68056	7.68366	7.69579	7.93272	7.75877	7.86752	7.82308	7.84144	7.7193	1	1	0.546948	Miscellaneous		phosphate-induced (phi) protein 1
AT4G02330	6.49581	6.6061	6.69542	6.64725	6.56145	6.5335	6.87183	6.74011	6.73169	6.75161	1	1	0.547424	Proteins acting on cell wall polysaccharides	carbohydrate esterase (CE)	carbohydrate esterase family 8 - CE8 (pectin methylesterase - PME) (AtPME41)
AT4G21620	6.76265	6.54501	6.83348	7.14423	7.07212	7.15627	6.46695	7.0486	6.80294	7.14405	1	1	0.548501	Unknown function		expressed protein
AT2G28100	7.27255	7.47699	7.47943	7.24002	7.12451	7.07453	7.32068	6.75341	7.04367	7.03627	1	1	0.55306	Proteins acting on cell wall polysaccharides	glycoside hydrolase (GH)	glycoside hydrolase family 29 - GH29 (alpha-L-fucosidase)
AT2G38530	8.1778	7.93463	8.03211	8.24972	7.88838	7.95533	7.90306	7.91058	8.09437	8.16623	1	1	0.562583	Proteins related to lipid metabolism	lipid transfer protein (LTP)	non-specific lipid transfer protein (AtLTP1.4, AtLTP2)
AT3G08680	6.60738	6.54501	6.58399	6.88244	6.42788	6.57337	6.46695	6.58927	6.54608	6.65803	1	1	0.565111	Signaling	LRR-RLK	leucine-rich repeat receptor protein kinase (LRR III subfamily)
AT4G00860	7.0048	6.99469	7.1295	7.1998	7.15121	7.32917	6.97511	7.19147	7.28147	7.29656	1	1	0.57021	Unknown function		expressed protein (DUF1138)
AT2G06925	6.80142	6.57823	6.6324	6.30261	6.76717	6.68305	6.89028	6.72015	6.81099	6.61734	1	0.174491	0.588902	Proteins related to lipid metabolism		phospholipase A2
AT4G01130	7.06259	7.00504	7.05906	6.74689	6.88011	6.79323	7.14354	6.94983	7.02453	6.83792	1	1	0.590476	Proteins related to lipid metabolism	GDSL family	lipase acylhydrolase (GDSL family)
AT4G39640	7.30406	7.40826	7.31914	7.12205	7.41451	7.29866	7.14633	7.25594	7.38453	7.32263	1	1	0.594884	Miscellaneous		gamma glutamyltranspeptidase (GGT2)
AT2G37640	6.50544	6.37123	6.70512	6.46239	6.58219	6.50144	6.40948	6.2403	6.60489	6.38627	1	1	0.601105	Proteins acting on cell wall polysaccharides	expansin	alpha-expansin (ATHEXP ALPHA 1.9) (AtEXPA3)
AT1G80170	7.08154	6.58112	6.75157	6.6582	6.989	6.47252	7.35051	7.17355	7.13259	6.74724	1	0.422001	0.603776	Proteins acting on cell wall polysaccharides	glycoside hydrolase (GH)	glycoside hydrolase family 28 - GH28 (polygalacturonase)
AT4G20830	7.22337	7.35114	7.18609	7.03904	7.44707	7.28148	7.19293	7.26615	7.1854	7.26138	1	1	0.611838	Oxido-reductases	berberine-bridge oxido-reductase	berberine-bridge enzyme (S)-reticulin:oxygen oxido-reductase
AT2G39780	7.54121	7.6437	7.60783	7.88628	7.03314	7.7233	7.57615	7.81301	7.54241	7.6696	1	1	0.617008	Miscellaneous		ribonuclease T2
AT1G10640	6.96562	6.55567	6.72835	6.35706	6.98651	6.47678	6.86743	6.57967	6.916	6.52045	1	0.00168168	0.618904	Proteins acting on cell wall polysaccharides	glycoside hydrolase (GH)	glycoside hydrolase family 28 - GH28 (polygalacturonase)
AT5G67130	6.87033	7.12662	7.06292	6.92835	6.84997	6.8485	6.65828	6.74857	6.70991	6.79293	1	1	0.626807	Proteins related to lipid metabolism		expressed protein (phospholipase C, phosphatidylinositol-specific, X domain)
AT3G20520	7.19827	7.07687	6.71108	6.95187	7.12659	6.81147	6.67538	6.56702	6.82661	6.56488	1	1	0.635719
AT5G24770	6.68878	6	6.89285	7.23367	7.15058	6.9516	7.1371	6.36554	6.7969	6.30796	1	1	0.652838
AT3G04290	6.88526	6.9333	7.16391	6.81241	6.76297	6.73438	6.81783	6.70306	6.97809	6.95377	1	1	0.666734
AT4G23820	7.02463	7.3762	7.29695	7.60289	7.25713	7.5768	7.35586	7.53457	7.41882	7.57897	1	0.0477272	0.692401
AT5G08380	8.1713	8.16715	7.83923	7.87845	8.11068	7.95471	8.06937	8.14254	8.05082	8.12008	1	1	0.692445
AT3G56310	7.26349	7.36765	7.36475	7.38687	7.35467	7.48031	7.45173	7.45482	7.50113	7.55972	1	1	0.693619
AT4G34180	6.68822	6.37026	6.4216	6.43201	7.29053	7.23516	6.78618	7.17431	7.30164	7.11846	1	1	0.706631
AT1G72610	7.98772	8.04652	8.00779	7.83378	7.90519	8.03911	7.99814	7.60114	7.94334	8.18422	1	1	0.718857
AT3G07390	7.86067	7.66474	7.89111	8.0562	7.69205	7.7987	7.74762	7.74791	7.64286	7.86114	1	1	0.719901
AT5G10770	7.35378	7.34698	7.18163	7.27504	7.36563	7.48095	7.33968	7.531	7.518	7.60353	1	1	0.720814
AT3G59510	6.40687	6.38926	6.39718	6.29394	6.47702	6.47066	6.08003	6.35883	6.03994	6	1	1	0.722156
AT2G23000	6.89619	6.71869	6.99758	6.84978	6.93285	6.89743	6.6579	6.67836	6.91546	6.84035	1	1	0.725877
AT4G16500	8.21013	8.02443	7.96645	7.93539	7.56191	7.85882	8.19607	7.32317	7.7538	7.6271	1	1	0.726647
AT1G67830	7.43587	7.41661	7.68563	7.45881	7.41646	7.24153	7.20371	7.22307	7.34977	7.14157	1	1	0.734545
AT2G04780	7.9259	7.96303	7.98478	7.49678	8.06029	7.81794	7.59027	7.45888	8.0421	7.87143	1	1	0.739069
AT2G29130	7.1605	6.89002	7.03718	6.90272	6.94975	7.09615	6.67558	6.88977	7.23042	7.22903	1	1	0.752093
AT5G44130	7.40909	6.77307	7.26436	6.91589	7.04849	6.75698	7.03069	7.07084	7.03245	6.74928	1	1	0.760314
AT1G30600	6.6599	6.54086	6.90617	6.2485	6.8191	6.60711	6.87635	6.92061	6.84755	6.62648	1	1	0.765558
AT1G07080	6.31359	6.54501	6.20066	6.61617	6.37088	6.43609	6.31733	6.29105	6.33195	6.40774	1	1	0.767115
AT1G79720	7.71088	7.61917	7.64594	7.54156	7.75715	7.79714	7.65499	7.36243	7.71786	7.68562	1	1	0.776717
AT5G07830	7.30769	7.38479	7.55276	7.54837	7.52161	7.5056	7.50153	7.48128	7.50349	7.47393	1	1	0.779334
AT5G59320	8.97405	9.20724	8.87004	9.30487	8.89424	9.14106	9.0134	9.24632	9.01676	9.10507	1	1	0.801714
AT3G48460	7.59061	7.58022	7.52925	7.52166	7.61069	7.53823	7.4935	7.60305	7.37804	7.4525	1	1	0.805141
AT5G41050	6.51003	6.61283	6.81704	6.69644	6.67261	6.52646	6.44959	6.55733	6.52207	6.49534	1	1	0.807631
AT1G69295	7.29585	7.22516	7.15915	7.40973	7.35334	7.62204	7.20766	7.43991	7.44568	7.34306	1	1	0.808507
AT2G05790	7.08317	6.99627	7.07059	6.94604	7.0511	6.89119	6.85889	6.89089	6.83686	6.87391	1	1	0.829692
AT4G00230	7.00465	7.03789	7.18558	7.14408	6.94442	7.03803	7.15241	7.31094	7.19323	7.11966	1	1	0.833598
AT5G45950	7.71298	7.60138	7.83449	7.54353	7.92748	7.59013	7.52253	7.46079	7.59168	7.67339	1	1	0.83817
AT3G14310	8.60696	8.51617	8.54785	8.53441	8.65908	8.54789	8.74504	8.7254	8.79944	8.79972	1	1	0.840849
AT5G26000	9.07629	8.97648	8.94895	8.79579	9.07921	8.93241	8.84872	8.66591	9.05158	9.02121	1	1	0.843607
AT1G75750	6.49397	6.62843	6.81113	6.87817	6.81361	6.9616	6.66915	6.55511	6.41947	6.60318	1	1	0.865741
AT1G67750	7.37259	7.33611	7.45239	7.05646	7.07859	6.88011	7.16688	7.03971	7.1394	7.05944	1	1	0.876538
AT2G02850	8.03356	8.17256	8.0832	8.14559	8.24659	8.27939	8.15223	8.17351	8.04072	8.03562	1	1	0.879539
AT1G13750	6.66416	6.64226	6.42997	6.38399	6.25844	6.39338	6.07303	6	6.53417	6.65962	1	1	0.884769
AT3G02880	6.97224	6.54501	7.02911	6.61617	6.66932	6.508	6.71488	6.45584	7.02798	6.47297	1	1	0.886744
AT5G10560	7.95965	7.93881	7.99156	8.00442	8.0358	7.96846	7.93968	7.96501	7.87769	7.89643	1	1	0.898573
AT5G39280	6.96661	7.07995	6.39938	6.67452	6.86644	6.98178	7.11787	6.92199	6.30984	6.47591	1	1	0.90629
AT3G11780	7.00487	6.86028	6.76253	6.98672	6.71779	6.88604	7.07442	7.29893	7.01211	7.24634	1	1	0.913683
AT5G23210	7.72504	7.93652	7.69363	7.69916	7.8271	7.93487	8.03446	8.52385	7.76934	8.20302	1	1	0.920972
AT3G12700	7.2431	7.14515	7.23627	7.19602	7.15065	7.22649	7.09205	7.12142	7.23353	7.25863	1	1	0.926437
AT2G38540	9.1559	9.27165	9.00787	9.13267	8.82888	9.38249	9.04454	9.3957	9.05957	9.23202	1	1	0.931662
AT1G21880	7.09843	7.28609	7.14772	7.65385	7.06307	7.27081	7.1473	7.29883	6.95527	7.20965	1	1	0.941148
AT3G07990	6.66979	6.77084	6.49747	6.57359	6.55669	6.50722	6.52953	6.43247	6.482	6.37424	1	1	0.9422
AT2G35860	6.92919	6.86306	7.18117	7.15998	6.80216	7.00057	6.85548	7.09865	6.93852	7.03496	1	1	0.946081
AT5G08000	5.96885	6.14845	6.32899	6.61617	6.08931	6.25668	6.19122	6.18223	6.60792	6.83663	1	1	0.948127
AT1G68560	8.7385	8.66234	8.74169	8.74095	8.74471	8.70963	8.61349	8.5914	8.66134	8.62323	1	1	0.954522
AT1G17860	7.6409	7.42139	6.82547	6.97621	6.95046	7.12163	7.25382	7.04931	7.21768	7.05531	1	1	0.958659
AT5G63180	6.85029	7.04239	6.65767	6.79679	7.00684	6.83751	6.95437	7.03557	6.79201	6.95005	1	1	0.988677
AT5G59310	9.573	9.5787	9.21465	9.50065	9.52794	9.51056	9.42697	9.53569	9.43197	9.52217	1	1	0.995261
AT4G20430	6.64842	6.47581	6.42596	6.50184	7.03744	6.78488	6.46695	6.45584	6.54396	6.54951	1	1	0.998319
