# Supplementary material for: An Integrative Study Showing the Adaptation to Sub-Optimal Growth Conditions of Natural Populations of Arabidopsis thaliana: A Focus on Cell Wall Changes
Source: Cells. 2020 Oct 7;9(10):2249. doi: 10.3390/cells9102249 (PMC7601860; doi:10.3390/cells9102249)
Supplement: Supplementary file 1 [file cells-09-02249-s001.zip › Duruflé et al._Supplementary Table S2.xlsx]

## Sheet: Information
Supplementary Table S2. Statistical analysis of rosette and floral stems transcriptomic data
Short pair-end sequencing reads generated from the Illumina platform (ng6.toulouse.inra.fr/) were trimmed based on the quality scores (limit: 0.05), end ambiguity (maximum allowed number of ambiguities: 2) and adaptor sequences, using the commercial CLC Genomic Workbench 8.0 software (CLC bio, Aarhus, Denmark). The online CLC protocol for trimming and assembly has been followed (www.clcsupport.co…
Supplementary Table S2A. Transcript levels in rosettes after growth at 22°C or 15°C.
Supplementary Table S2B. Transcripts levels of genes encoding CWPs identified by LC-MS/MS in rosettes (see Table S2A)
Supplementary Table S2C. Transcript levels in floral stems after growth at 22°C or 15°C.
Supplementary Table S2D. Transcript levels of genes encoding CWPs identified by LC-MS/MS in floral stems (see Table S2C)

## Sheet: Table S2A
Supplementary Table S2A. Transcript levels in rosettes after growth at 22°C or 15°C.
Results are expressed as means of RPKMs
	ANOVA (in red if significant, that is lower than 1E-04)
AGI code	Col. 22	Col. 15	Roch.22	Roch.15	Grip. 22	Grip. 15	Hern.22	Hern.15	Hosp.22	Hosp.15	ecotype	temperature	interaction	Pfam	Interpro
AT3G47810	61.8067	88.4733	4.64	7.00333	21.69	23.2667	3.83333	6.32333	4.13667	8.20333	1.69479e-18	0.000500849	0.000319104	PF12850 Calcineurin-like phosphoesterase superfamily domain	IPR024654 Calcineurin-like phosphoesterase superfamily domain / IPR000979 Phosphodiesterase MJ0936
AT2G13300	0.0366667	0.103333	0	0	5.73	7.59667	0	0	0.0266667	0.0566667	4.62436e-18	1	0.0458412
AT1G61510	0	0	1.98333	3.99333	0.163333	0.153333	0	0	0	0	9.28723e-18	7.2e-05	1.29901e-08
AT4G24420	0	0	0.0733333	0.0566667	0.433333	0	0	0	5.90667	20.4167	7.29337e-17	1.34874e-07	7.02084e-12		IPR012677 Nucleotide-binding, alpha-beta plait
AT3G62460	8.11333	5.22333	151.58	122.54	158.617	131.73	0.533333	0.333333	3.02	1.49333	1.81344e-16	1	1	PF01936 Protein of unknown function DUF88	IPR021139 NYN domain, limkain-b1-type
AT5G43050	15.9567	13.2	1.44	0.99	0.8	0.22	0.21	0.323333	0.196667	0.48	5.35262e-16	1	1	PF04483 Protein of unknown function (DUF565)	IPR007572 Uncharacterised protein family Ycf20
AT3G60950	0	0	0	0.01	0	0.02	6.28333	7.79667	0	0	6.07715e-16	1	1	PF00168 C2 domain	IPR000008 C2 calcium-dependent membrane targeting / IPR005135 Endonuclease/exonuclease/phosphatase / IPR018029 C2 membrane targeting protein / IPR008973 C2 calcium/lipid-binding domain, CaLB
AT1G27540	11.1867	17.0467	39.1133	41.4	48.4467	46.49	0.823333	1.17	3.59333	4.79667	1.61281e-15	1	1	PF03478 Protein of unknown function (DUF295)	IPR005174 Protein of unknown function DUF295
AT3G29736	0.02	0.0233333	11.8167	23.2167	0	0.0433333	0.0833333	0	0	0.0166667	3.79703e-15	0.0158983	8.15495e-06
AT5G35796	0	0	0	0.0666667	0.0266667	0	0.0233333	0.0766667	6.02667	10.16	4.51716e-15	0.337916	0.000708495
AT4G02450	60.4867	59.63	13.2467	11.0133	15.0833	11.3867	64.8	49.04	15.81	20.4033	9.85862e-15	1	1	PF04969 CS domain	IPR017447 CS domain / IPR008978 HSP20-like chaperone / IPR007052 CS-like domain
AT5G14840	1.44333	0.473333	0.0366667	0	0	0	3.74667	5.24667	0	0	1.17678e-14	1	0.00982571
AT5G24240	0.0666667	0.193333	6.69	8.62	21.5967	17.8167	0.276667	0.14	5.36	13.9633	2.3145e-14	1	0.000519742	PF00240 Ubiquitin family / PF00240 Ubiquitin family / PF00240 Ubiquitin family / PF00454 Phosphatidylinositol 3- and 4-kinase	IPR000626 Ubiquitin / IPR000403 Phosphatidylinositol 3-/4-kinase, catalytic domain / IPR011009 Protein kinase-like domain / IPR019955 Ubiquitin supergroup
AT3G43520	47.3667	54.8533	6.56667	5.61	7.45	6.99333	9.14667	10.21	34.7967	64.71	9.12048e-14	0.0488538	0.00215395	PF03647 Transmembrane proteins 14C	IPR005349 Uncharacterised protein family UPF0136, Transmembrane
AT3G29787	0	0	5.33333	7.50667	7.68	8.29667	0	0	0.146667	0.133333	9.79187e-14	1	1
AT4G22710	1.98	3.57667	1.70333	1.36667	0.73	1.85333	0.59	0.723333	36.06	67.4433	1.1746e-13	0.107203	0.000501037	PF00067 Cytochrome P450 / PF00067 Cytochrome P450	IPR001128 Cytochrome P450 / IPR017972 Cytochrome P450, conserved site / IPR002401 Cytochrome P450, E-class, group I
AT2G04378	30.19	24.6067	0.433333	0.0366667	0.0233333	0	0	0	0	0.03	1.81925e-13	1	1
AT3G18535	10.56	10.54	0.14	0.103333	0	0.113333	55.03	63.24	7.35333	5.15667	2.18315e-13	1	1
AT5G59630	0	0.1	0.0166667	0.0466667	0.0133333	0.0433333	1.09333	1.19667	0.0133333	0.01	4.86303e-13	1	1
AT1G09420	1.76333	2.67333	21.9333	41.6667	31.65	37.5667	3.57	3.63	24.16	35.99	5.2788e-13	0.000368768	0.0350276	PF00479 Glucose-6-phosphate dehydrogenase, NAD binding domain / PF02781 Glucose-6-phosphate dehydrogenase, C-terminal domain	IPR022674 Glucose-6-phosphate dehydrogenase, NAD-binding / IPR022675 Glucose-6-phosphate dehydrogenase, C-terminal / IPR001282 Glucose-6-phosphate dehydrogenase / IPR016040 NAD(P)-binding domain
AT2G15290	67.46	67.0467	18.1067	16.3333	70.3033	78.3833	16.7033	18.87	19.37	14.81	5.84964e-13	1	1	PF12263 Protein of unknown function (DUF3611)	IPR022051 Protein of unknown function DUF3611
AT4G20480	25.3667	25.37	23.7067	32.79	0.07	0.0233333	27.0033	27.7767	27.9167	54.3067	1.03309e-12	0.000520577	8.51041e-05	PF01936 Protein of unknown function DUF88	IPR021139 NYN domain, limkain-b1-type / IPR024768 Limkain-b1
AT3G44280	14.6767	16.3567	0.75	0.69	0.523333	0.58	14.2267	18.47	1.02667	1.34667	1.27534e-12	1	1
AT1G35340	44.78	47.2967	38.33	37.92	6.28667	5.16	7.03667	5.3	7.3	6.78333	1.27602e-12	1	1	PF02190 ATP-dependent protease La (LON) domain	IPR003111 Peptidase S16, lon N-terminal / IPR015947 PUA-like domain
AT2G10410	107.857	100.183	1.21	0.11	0.11	0.0566667	0.11	0.133333	0.22	0.303333	1.63258e-12	1	1
AT5G54290	52.2867	67.19	2.03667	1.76333	41.55	57.8867	47.5767	71.6233	2.86	3.48333	1.79732e-12	0.0384664	1	PF02683 Cytochrome C biogenesis protein transmembrane region	IPR003834 Cytochrome c assembly protein, transmembrane domain
AT4G14905	3.85667	5.78667	0.0266667	0	0	0	0.0233333	0	0	0	1.95919e-12	1	1	PF01344 Kelch motif 52-94 96-142 144-186 188-234 / PF01344 Kelch motif 52-94 96-142 144-186 188-234 / PF01344 Kelch motif 52-94 96-142 144-186 188-234 / PF00646 F-box domain	IPR006652 Kelch repeat type 1 / IPR015916 Galactose oxidase, beta-propeller / IPR001810 F-box domain, cyclin-like
AT5G38120	2.05667	1.60333	6.03	6.60667	40.5567	9.81667	1.34333	2.62	2.72667	1.49333	2.83348e-12	2.81242e-05	4.26795e-09	PF00501 AMP-binding enzyme / PF13193 AMP-binding enzyme C-terminal domain / PF00501 AMP-binding enzyme / PF13193 AMP-binding enzyme C-terminal domain	IPR000873 AMP-dependent synthetase/ligase / IPR025110 Domain of unknown function DUF4009 / IPR020845 AMP-binding, conserved site
AT5G55790	9.21667	11.24	0.243333	0.22	0.6	1.32667	0	0	0.396667	0.653333	3.02969e-12	1	1
AT5G05060	16.3567	12.3633	0.0433333	0.03	2.90333	2.77667	1.22667	1.66333	0.14	0.163333	3.63918e-12	1	1		IPR006525 Cystatin-related, plant
AT1G24807	0.0466667	0.0466667	0.38	0.226667	11.0533	4.96333	0.0766667	0.0466667	5.25	5.46333	3.67786e-12	0.370709	0.000442918	PF00117 Glutamine amidotransferase class-I	IPR017926 Glutamine amidotransferase / IPR006221 Anthranilate synthase/para-aminobenzoate synthase like domain
AT4G02725	60.0067	51.82	5.29	4.76333	4.16	4.48	62.6	64.8233	4.10667	5.57	3.71368e-12	1	1
AT3G30218	0	0	0	0.01	0	0.00666667	1.30333	1.40333	0.01	0	4.63346e-12	1	1
AT5G10140	0.676667	0.62	55.4367	59.03	8.07	5.83333	45.01	24.0033	48.39	58.5933	4.73119e-12	1	1	PF01486 K-box region / PF00319 SRF-type transcription factor (DNA-binding and dimerisation domain)	IPR002487 Transcription factor, K-box / IPR002100 Transcription factor, MADS-box
AT1G27570	0	0	0.04	0	0	0	1.54333	2.11	0.883333	3.21667	5.82966e-12	0.000374582	6.63137e-06	PF00454 Phosphatidylinositol 3- and 4-kinase / PF00454 Phosphatidylinositol 3- and 4-kinase / PF11935 Domain of unknown function (DUF3453)	IPR000403 Phosphatidylinositol 3-/4-kinase, catalytic domain / IPR021850 Protein of unknown function DUF3453 / IPR016024 Armadillo-type fold
AT5G28919	20.01	20.87	0.27	0	0	0.0133333	0.02	0	0.02	0.11	7.64884e-12	1	1		IPR001944 Glycoside hydrolase, family 35
AT2G33220	78.3767	73.3733	4.44	4.31667	5.07667	3.94667	4.41667	4.91667	3.31667	4.97667	8.24243e-12	1	1	PF06212 GRIM-19 protein	IPR009346 GRIM-19
AT5G27630	0.493333	0.84	0.733333	1.48667	0.803333	1.75	0.866667	1.24	3.62	7.74333	1.06647e-11	5.41858e-05	0.000637148	PF00887 Acyl CoA binding protein / PF07646 Kelch motif 52-94 96-142 144-186 / PF13415 Galactose oxidase, central domain / PF13415 Galactose oxidase, central domain / PF13854 Kelch motif	IPR000582 Acyl-CoA-binding protein, ACBP / IPR011498 Kelch repeat type 2 / IPR014352 FERM/acyl-CoA-binding protein, 3-helical bundle / IPR015915 Kelch-type beta propeller / IPR006652 Kelch repeat type 1
AT1G65985	1.58333	1.16333	0	0	0	0.0366667	0	0	0	0.0333333	1.10895e-11	1	1	PF03140 Plant protein of unknown function	IPR004158 Protein of unknown function DUF247, plant
AT3G29739	0	0.0533333	13.7733	20.9833	0	0	0.05	0.106667	0	0	1.11956e-11	1	1
AT3G06433	1.00333	0.33	0.0133333	0.0666667	0	0	0.0333333	0.113333	0	0.00666667	1.12378e-11	0.147028	8.18253e-07
AT1G44510	0	0	0.01	0	0.02	1.20333	0	0	0.04	0	1.22187e-11	3.69246e-07	1.55726e-11
AT2G04170	4.01333	13.4467	1.54333	1.65	0.4	1.49	0.4	4.10667	0.816667	0.31	1.32563e-11	5.56293e-07	2.10697e-07	PF00917 MATH domain / PF00917 MATH domain / PF00917 MATH domain / PF00917 MATH domain	IPR002083 MATH / IPR008974 TRAF-like
AT4G13170	49.53	22.4467	1.91667	1.06333	15.3433	8.09333	46.19	25.86	18.0367	12.75	1.49893e-11	1.21847e-06	0.00220557	PF00572 Ribosomal protein L13	IPR005822 Ribosomal protein L13 / IPR023564 Ribosomal protein L13 domain / IPR005755 Ribosomal protein L13, eukaryotic/archaeal / IPR023563 Ribosomal protein L13, conserved site
AT3G44890	226.7	142.88	49.0333	24.84	44.2533	23.2067	250.05	186.363	52.44	23.21	1.56297e-11	0.00421525	1	PF01281 Ribosomal protein L9, N-terminal domain / PF03948 Ribosomal protein L9, C-terminal domain	IPR020070 Ribosomal protein L9, N-terminal / IPR020069 Ribosomal protein L9, C-terminal / IPR009027 Ribosomal protein L9/RNase H1, N-terminal / IPR020594 Ribosomal protein L9, bacteria/chloroplast / IPR000244 Ribosomal protein L9
AT1G25155	0.0566667	0.04	0.416667	0.293333	12.2467	5.49667	0.166667	0.11	6.07667	6.59667	1.76913e-11	1	0.00173206	PF00117 Glutamine amidotransferase class-I	IPR017926 Glutamine amidotransferase / IPR006221 Anthranilate synthase/para-aminobenzoate synthase like domain
AT4G28030	98.63	66.2233	40.45	28.1733	45.37	27.32	132.027	105.057	51.6867	30.5367	2.13162e-11	0.000197172	1	PF00583 Acetyltransferase (GNAT) family	IPR000182 GNAT domain / IPR016181 Acyl-CoA N-acyltransferase
AT4G16940	0.203333	0.38	0.183333	0.0133333	0.18	0.116667	0.326667	0.583333	6.01667	7.06333	2.37789e-11	1	1	PF00560 Leucine Rich Repeat 17-38 40-61 / PF00560 Leucine Rich Repeat 17-38 40-61 / PF00931 NB-ARC domain / PF01582 TIR domain / PF07725 Leucine Rich Repeat / PF07725 Leucine Rich Repeat	IPR011713 Leucine-rich repeat 3 / IPR002182 NB-ARC / IPR000157 Toll/interleukin-1 receptor homology (TIR) domain / IPR001611 Leucine-rich repeat / IPR000767 Disease resistance protein / IPR003593 AAA+ ATPase domain / IPR027417 P-loop containing nucleoside triphosphate hydrolase
AT1G31580	2109.14	2827.26	29.0867	2.84	22.3533	19.5267	1.51667	1.84	1.02667	6.18	2.73372e-11	1	1
AT4G08110	3.95667	4.70667	0	0.01	0.0266667	0	2.49667	3.09667	0	0.02	2.77512e-11	1	1
AT5G57890	8.35	5.92333	1.27667	0.92	1.40333	0.753333	8.74333	5.4	14.31	8.26	2.99912e-11	0.00041549	0.476338	PF00117 Glutamine amidotransferase class-I	IPR017926 Glutamine amidotransferase / IPR006221 Anthranilate synthase/para-aminobenzoate synthase like domain
AT5G56747	2.95	5.7	0	0	0	0.11	0.06	0.0766667	0.04	0.32	3.00468e-11	1	0.0358832
AT5G34795	0.59	1.03667	0.03	0	0	0	2.42667	3.87667	0	0	3.03361e-11	1	1
AT4G09360	0	0	0	0	0	0	1.22	0.92	0	0	3.05688e-11	1	1	PF00931 NB-ARC domain / PF00560 Leucine Rich Repeat 17-38 40-61	IPR002182 NB-ARC / IPR001611 Leucine-rich repeat / IPR027417 P-loop containing nucleoside triphosphate hydrolase / IPR000767 Disease resistance protein / IPR003593 AAA+ ATPase domain
AT3G27990	5.25667	4.99333	0	0	0	0	5.79	7.2	0	0	3.23139e-11	1	1
AT1G25211	27.77	37.6167	0.263333	0.0166667	1.47	2.02333	0	0	1.33333	4.04333	3.35474e-11	1	1	PF00646 F-box domain / PF07734 F-box associated	IPR006527 F-box associated domain, type 1 / IPR017451 F-box associated interaction domain / IPR001810 F-box domain, cyclin-like
AT3G47965	15.6067	18.9333	0	0	0	0	0	0	0	0.106667	4.05787e-11	1	1
AT1G66590	7.35333	11.1833	40.3367	58.7833	7.29	5.61333	13.6633	16.4967	49.7167	110.447	5.48577e-11	0.00326034	0.00104038	PF06747 CHCH domain	IPR010625 CHCH
AT3G44740	3.85667	3.03	0	0	0	0	0	0	0	0	5.76222e-11	1	1	PF00587 tRNA synthetase class II core domain (G, H, P, S and T)	IPR002314 Aminoacyl-tRNA synthetase, class II (G/ H/ P/ S), conserved domain / IPR027031 Glycyl-tRNA synthetase/DNA polymerase subunit gamma-2 / IPR002315 Glycyl-tRNA synthetase, alpha2 dimer
AT5G27345	0.04	0.306667	0.0633333	0	2.48	1.37	0.09	0	0.146667	0.216667	6.08649e-11	1	0.0296005
AT1G28510	16.0467	12.8267	19.1267	13.31	21.8167	15.7667	0.473333	0.203333	18.9267	15.8	6.65663e-11	0.0102283	1	PF07047 Optic atrophy 3 protein (OPA3)	IPR010754 Optic atrophy 3-like
AT4G33360	12.31	15.5	0.54	0.37	0.403333	0.496667	11.8233	9.31667	0.496667	1.03667	6.86766e-11	1	1	PF01370 NAD dependent epimerase/dehydratase family	IPR001509 NAD-dependent epimerase/dehydratase / IPR016040 NAD(P)-binding domain
AT1G07660	23.6533	22.4567	23.56	28.7733	22.84	28.2833	23.9533	30.6667	44.0633	82.2733	6.89345e-11	0.000166178	0.000124042	PF00125 Core histone H2A/H2B/H3/H4	IPR007125 Histone core / IPR019809 Histone H4, conserved site / IPR001951 Histone H4 / IPR009072 Histone-fold
AT4G15690	13.41	1.42667	1.01	0	2.3	0.0433333	4.08333	0.12	0.113333	0	7.76908e-11	6.68773e-10	6.15272e-09	PF00462 Glutaredoxin	IPR002109 Glutaredoxin / IPR012336 Thioredoxin-like fold / IPR011905 Glutaredoxin-like, plant II / IPR014025 Glutaredoxin subgroup
AT1G24148	23.3767	32.9033	0.603333	0.226667	17.4267	33.3067	0.39	0.2	0.776667	0.606667	8.18781e-11	1	1
AT2G28430	27.8833	31.6033	0.173333	0	0.08	0	25.4633	30.58	0.0633333	0.143333	9.37624e-11	1	1
AT3G11530	17.2333	17.4133	0.23	0.186667	0.443333	0.26	18.8867	24.5633	0.223333	0.476667	9.52799e-11	1	1	PF04133 Vacuolar protein sorting 55	IPR007262 Vacuolar protein sorting 55
AT2G18400	13.49	8.86667	0.936667	0.63	0.986667	0.57	6.81333	10.19	0.723333	2.02333	1.00631e-10	1	0.194634	PF00347 Ribosomal protein L6 11-82	IPR020040 Ribosomal protein L6, alpha-beta domain / IPR000702 Ribosomal protein L6 / IPR002358 Ribosomal protein L6, conserved site / IPR019906 Ribosomal protein L6, bacterial-type
AT5G43403	1.98	2.98667	0	0.03	0	0	0	0	0	0	1.16767e-10	1	1
AT2G17420	37.9367	41.25	42.72	42.9933	45.1533	43.92	8.3	5.76	9.75667	13.0033	1.16931e-10	1	1	PF07992 Pyridine nucleotide-disulphide oxidoreductase	IPR023753 Pyridine nucleotide-disulphide oxidoreductase, FAD/NAD(P)-binding domain / IPR000103 Pyridine nucleotide-disulphide oxidoreductase, class-II / IPR013027 FAD-dependent pyridine nucleotide-disulphide oxidoreductase / IPR005982 Thioredoxin reductase / IPR008255 Pyridine nucleotide-disulphide oxidoreductase, class-II, active site
AT4G13810	9.84667	24.3867	0.226667	0.35	1.17	0.746667	3.1	1.95333	0.293333	0.446667	1.21092e-10	0.849857	0.000212518	PF00560 Leucine Rich Repeat 17-38 40-61 / PF00560 Leucine Rich Repeat 17-38 40-61 / PF08263 Leucine rich repeat N-terminal domain / PF12799 Leucine Rich repeats (2 copies) / PF13516 Leucine Rich repeat / PF13855 Leucine rich repeat / PF13855 Leucine rich repeat	IPR013210 Leucine-rich repeat-containing N-terminal, type 2 / IPR001611 Leucine-rich repeat / IPR025875 Leucine rich repeat 4 / IPR003591 Leucine-rich repeat, typical subtype
AT1G71920	1.61333	1.04667	21.5267	12.3867	24.7733	16.5133	1.02667	1.55	1.77	1.32	1.26615e-10	0.714382	1	PF00155 Aminotransferase class I and II	IPR004839 Aminotransferase, class I/classII / IPR015424 Pyridoxal phosphate-dependent transferase / IPR015422 Pyridoxal phosphate-dependent transferase, major region, subdomain 2 / IPR005861 Histidinol-phosphate aminotransferase family / IPR015421 Pyridoxal phosphate-dependent transferase, major region, subdomain 1
AT1G42852	0	0	1.68	2.73667	0	0	0	0	0	0.06	1.26696e-10	1	1
AT4G07825	26.89	18.2467	0.513333	0.0166667	0	0	0.0233333	0	0	0.0466667	1.42441e-10	1	1
AT4G31530	53.77	60.8067	63.6333	63.7733	66.32	62.3233	16.6033	16.9733	17.1867	12.2033	1.4849e-10	1	1	PF13460 NADH(P)-binding	IPR016040 NAD(P)-binding domain
AT5G24670	20.6867	28.2333	23.5667	52.44	4.63333	3.97	50.06	73.4433	3.48	7.05667	1.53254e-10	0.00879557	1	PF00383 Cytidine and deoxycytidylate deaminase zinc-binding region	IPR002125 CMP/dCMP deaminase, zinc-binding / IPR016193 Cytidine deaminase-like
AT1G27565	0	0.17	0.393333	0.223333	14.56	14.27	22.0133	15.8067	24.06	42.5167	1.55318e-10	1	0.0435103
AT3G58010	26.6033	44.9	14.8733	23.0567	15.8833	20.4833	24.0567	40.6867	17.9133	21.49	1.74593e-10	4.1438e-09	0.00229982	PF04755 PAP_fibrillin	IPR006843 Plastid lipid-associated protein/fibrillin conserved domain
AT4G09200	4.50333	5.53	0	0.0166667	0	0	0	0	3.13333	5.62333	1.95383e-10	1	1	PF10607 Ran binding protein in the microtubule-organising centre / PF00622 SPRY domain	IPR024964 CTLH/CRA C-terminal to LisH motif domain / IPR003877 SPla/RYanodine receptor SPRY / IPR018355 SPla/RYanodine receptor subgroup / IPR006595 CTLH, C-terminal LisH motif / IPR013144 CRA domain / IPR008985 Concanavalin A-like lectin/glucanases superfamily / IPR001870 B30.2/SPRY domain / IPR006594 LisH dimerisation motif
AT4G09680	5.17667	7.86667	7.21333	10.35	0.496667	0.373333	2.95667	2.90333	0.56	0.503333	1.97588e-10	1	1	PF15491 CST, telomere maintenance, complex subunit CTC1	IPR028262 CST complex subunit CTC1, plant
AT4G09580	10.6667	14.0567	3.03333	3.39333	11.2833	13.22	1.34	1.16333	5.29	7.04333	2.0653e-10	1	1	PF09335 SNARE associated Golgi protein	IPR015414 SNARE associated Golgi protein
AT3G20120	4.97333	9.64333	0.0466667	0.18	5.84	11.2467	3.95667	6.66333	6.86333	21.19	2.14757e-10	5.34147e-08	2.89575e-05	PF00067 Cytochrome P450	IPR001128 Cytochrome P450 / IPR017972 Cytochrome P450, conserved site / IPR002401 Cytochrome P450, E-class, group I
AT1G20810	64.0067	47.5767	16.9567	9.02667	13.2	9.3	66.46	61.2	18.59	9.07	2.17663e-10	1	1	PF00254 FKBP-type peptidyl-prolyl cis-trans isomerase	IPR001179 Peptidyl-prolyl cis-trans isomerase, FKBP-type, domain / IPR023566 Peptidyl-prolyl cis-trans isomerase, FKBP-type
AT5G07780	0.0166667	0.576667	0.106667	0.39	0.21	0.16	0.0833333	0.0766667	0.616667	4.93	2.2502e-10	1.9966e-06	1.4042e-08	PF02181 Formin Homology 2 Domain	IPR015425 Actin-binding FH2 / IPR027643 Formin-like family, plant
AT5G21070	8.08	8.86333	7.47667	14.26	7.89333	13.3167	0.0833333	0.123333	0.06	0.343333	2.27822e-10	0.0307185	0.45962
AT4G04180	0.716667	0.95	4.26667	7.08333	4.93667	6.61	1.57333	1.91	4.79667	10.43	2.52281e-10	5.15627e-05	0.00824603	PF00004 ATPase family associated with various cellular activities (AAA)	IPR003959 ATPase, AAA-type, core / IPR003593 AAA+ ATPase domain / IPR003960 ATPase, AAA-type, conserved site / IPR027417 P-loop containing nucleoside triphosphate hydrolase
AT4G12060	54.9567	44.5567	20.5867	14.7967	23.2267	16.78	20.9967	19.4067	8.50333	6.56667	2.68399e-10	1	1	PF02861 Clp amino terminal domain / PF02861 Clp amino terminal domain	IPR004176 Clp, N-terminal / IPR023150 Double Clp-N motif
AT2G09795	9.94333	12.7367	0.186667	0	0	0	0.04	0	0	0.163333	2.69288e-10	1	1
AT3G29680	2.3	4.63	1.56667	3.23333	1.13	3.05667	9.03	10.4867	1.65333	1.05	2.79849e-10	0.520349	1	PF02458 Transferase family	IPR003480 Transferase / IPR023213 Chloramphenicol acetyltransferase-like domain
AT1G23780	11.1167	16.98	0.3	0.266667	0.276667	0.163333	14.8233	15.7367	15.1333	23.9933	2.835e-10	1	1	PF12937 F-box-like	IPR001810 F-box domain, cyclin-like
AT1G71340	13.47	12.0467	1.79667	2.81	2.18	2.83667	1.66667	2.28667	25.5467	29.31	2.84122e-10	1	1	PF03009 Glycerophosphoryl diester phosphodiesterase family / PF03009 Glycerophosphoryl diester phosphodiesterase family	IPR004129 Glycerophosphoryl diester phosphodiesterase / IPR017946 PLC-like phosphodiesterase, TIM beta/alpha-barrel domain
AT1G12940	0.366667	0.143333	0.67	1.62333	0.653333	0.653333	0.743333	0.233333	0.0566667	11.6967	2.95815e-10	2.75625e-07	4.61433e-11	PF07690 Major Facilitator Superfamily	IPR011701 Major facilitator superfamily / IPR016196 Major facilitator superfamily domain, general substrate transporter
AT1G71720	23.5033	17.6367	7.63667	3.58667	7.56667	4.20667	30.28	18.3333	35.3133	11.6233	3.1349e-10	1.56337e-07	0.000731129	PF00575 S1 RNA binding domain / PF00575 S1 RNA binding domain	IPR003029 Ribosomal protein S1, RNA-binding domain / IPR012340 Nucleic acid-binding, OB-fold / IPR022967 RNA-binding domain, S1
AT5G26800	14.9667	10.6333	1.07667	0.623333	0.993333	0.366667	19.4167	13.93	0.906667	0.976667	3.14011e-10	1	1	PF09597 IGR protein motif	IPR019083 IGR protein motif
AT1G63870	0.0466667	0.0266667	0.05	0.01	2.96	1.26	0	0	0.0333333	0.01	3.18419e-10	0.914789	0.00466563	PF07725 Leucine Rich Repeat / PF00931 NB-ARC domain / PF01582 TIR domain / PF00560 Leucine Rich Repeat 17-38 40-61	IPR011713 Leucine-rich repeat 3 / IPR002182 NB-ARC / IPR000157 Toll/interleukin-1 receptor homology (TIR) domain / IPR001611 Leucine-rich repeat / IPR027417 P-loop containing nucleoside triphosphate hydrolase / IPR000767 Disease resistance protein / IPR003593 AAA+ ATPase domain
AT4G22000	27.75	24.01	1.12667	0.713333	1.77667	3.36	32.5133	25.6233	0.51	1.23667	3.5087e-10	1	1
AT5G43060	7.98	7.71333	6.06333	6.64667	45.5933	74.92	5.15	4.39333	30.6033	33.8633	3.5563e-10	1	1	PF00112 Papain family cysteine protease / PF08246 Cathepsin propeptide inhibitor domain (I29) / PF00396 Granulin	IPR000668 Peptidase C1A, papain C-terminal / IPR013201 Proteinase inhibitor I29, cathepsin propeptide / IPR000118 Granulin / IPR013128 Peptidase C1A, papain / IPR000169 Cysteine peptidase, cysteine active site / IPR025660 Cysteine peptidase, histidine active site / IPR025661 Cysteine peptidase, asparagine active site
AT2G15555	0.0866667	0.0666667	0.896667	1.34667	3.88333	4.41333	73.83	96.4267	68.72	149.203	3.60072e-10	0.690868	0.118951
AT3G27430	54.1867	64.9567	26.3867	34.5533	30.6967	34.79	44.8867	43.4733	44.9467	67.0467	4.08495e-10	0.000450021	0.107693	PF00227 Proteasome A-type and B-type	IPR001353 Proteasome, subunit alpha/beta / IPR016050 Proteasome, beta-type subunit, conserved site / IPR023333 Proteasome B-type subunit / IPR000243 Peptidase T1A, proteasome beta-subunit
AT4G22450	0	0	12.9833	22.5867	0.106667	0.256667	0.05	0.0233333	0	0.04	4.39378e-10	1	1
AT1G68080	2.81	3.03	3.43	4.32	0.36	0.416667	0.366667	0.226667	3.56667	5.79667	4.69566e-10	1	1	PF13661 2OG-Fe(II) oxygenase superfamily	IPR005123 Oxoglutarate/iron-dependent dioxygenase / IPR006620 Prolyl 4-hydroxylase, alpha subunit
AT5G61550	0.0333333	0.133333	0.0966667	0.243333	1.78333	2.42333	0.153333	0.11	0.246667	1.13333	4.90769e-10	0.609731	1	PF00069 Protein kinase domain / PF00069 Protein kinase domain / PF04564 U-box domain	IPR003613 U box domain / IPR000719 Protein kinase, catalytic domain / IPR014729 Rossmann-like alpha/beta/alpha sandwich fold / IPR013083 Zinc finger, RING/FYVE/PHD-type / IPR008271 Serine/threonine-protein kinase, active site / IPR011009 Protein kinase-like domain / IPR002290 Serine/threonine- / dual specificity protein kinase, catalytic domain / IPR020635 Tyrosine-protein kinase, catalytic domain
AT3G18520	9.99667	12.55	11.6167	15.7733	11.9767	14.26	4.54333	4.69	4.89	5.34667	4.96085e-10	0.225089	1	PF00850 Histone deacetylase domain / PF00850 Histone deacetylase domain	IPR023801 Histone deacetylase domain / IPR000286 Histone deacetylase superfamily / IPR001876 Zinc finger, RanBP2-type
AT3G44042	0	0	0	0.0333333	2.84333	6.99333	0	0	0.0333333	0.12	5.00077e-10	0.940443	0.00325662
AT1G63390	0.406667	1.04333	8.65	8.19333	6.83667	9.92667	7.95667	8.97	27.3567	43.7433	5.18527e-10	1	1	PF13450 NAD(P)-binding Rossmann-like domain
AT1G63230	1.35333	1.55667	0.15	0.06	0	0.116667	0	0	0.0466667	0.06	5.71434e-10	1	1	PF01535 PPR repeat 10-34 52-76 94-118 / PF13041 PPR repeat family / PF13041 PPR repeat family / PF12854 PPR repeat / PF12854 PPR repeat / PF12854 PPR repeat / PF13041 PPR repeat family	IPR002885 Pentatricopeptide repeat / IPR011990 Tetratricopeptide-like helical
AT2G05440	7.85667	22.0767	0.0633333	0.756667	0.12	1.35333	0	0.0666667	3.96667	4.79	5.94226e-10	0.0146517	0.000427865	PF07172 Glycine rich protein family	IPR010800 Glycine rich protein
AT2G15292	12.3133	10.5967	0.17	0.0233333	0.693333	0.243333	0.02	0	0.106667	0.116667	6.0605e-10	1	1
AT2G14878	46.7867	69.0733	0.343333	0.07	0.0833333	0	0	0	0.0766667	0.34	6.43833e-10	1	1
AT1G31500	13.7767	11.64	3.66667	2.4	12.7833	13.3267	5.61	4.30667	14.24	14.3033	7.14095e-10	1	1	PF03372 Endonuclease/Exonuclease/phosphatase family	IPR005135 Endonuclease/exonuclease/phosphatase
AT5G26622	10.83	10.21	0.176667	0.0366667	11.2967	11.9267	0.02	0.0466667	0.07	0.23	7.31092e-10	1	1
AT5G39000	0.0133333	0.0166667	5.39667	5.07333	4.64333	5.70333	0.26	0.296667	0.116667	0.02	7.45498e-10	1	1	PF07714 Protein tyrosine kinase / PF12819 Carbohydrate-binding protein of the ER	IPR001245 Serine-threonine/tyrosine-protein kinase catalytic domain / IPR024788 Malectin-like carbohydrate-binding domain / IPR017441 Protein kinase, ATP binding site / IPR008271 Serine/threonine-protein kinase, active site / IPR000719 Protein kinase, catalytic domain / IPR002290 Serine/threonine- / dual specificity protein kinase, catalytic domain / IPR020635 Tyrosine-protein kinase, catalytic d…
AT2G05914	0.533333	0.336667	36.1867	11.5433	27.36	7.27667	0.2	0.0566667	13.4333	6.88667	8.10761e-10	8.70487e-07	5.68025e-05
AT4G32210	74.84	83.54	4.49667	2.08	1.27333	0.92	65.11	80.8333	75.7633	131.387	8.13783e-10	1	1	PF01127 Succinate dehydrogenase cytochrome b subunit	IPR000701 Succinate dehydrogenase/Fumarate reductase, transmembrane subunit
AT3G07565	11.5733	12.9433	12.6233	16.8333	11.3333	15.19	31.5633	41.0533	14.4033	21.1533	8.31821e-10	0.036345	1	PF12579 Protein of unknown function (DUF3755)	IPR022228 Protein of unknown function DUF3755 / IPR009057 Homeodomain-like
AT1G25054	10.92	26.8633	0.33	0.303333	0.673333	0.86	0.15	0.106667	0.446667	0.963333	8.3485e-10	0.891804	0.00373221	PF03331 UDP-3-O-acyl N-acetylglycosamine deacetylase	IPR004463 UDP-3-O-acyl N-acetylglucosamine deacetylase / IPR020568 Ribosomal protein S5 domain 2-type fold / IPR015870 UDP-3-O-acyl N-acetylglucosamine deacetylase, N-terminal / IPR011334 UDP-3-O-acyl N-acetylglucosamine deacetylase, C-terminal
AT3G54366	24.3433	32.7467	47.5533	99.2533	69.73	100.72	0.52	0.276667	53.2867	111.183	9.65362e-10	5.27112e-05	0.147734
AT4G16845	10.0367	13.3633	12.0167	18.13	1.62667	2.24667	2.00333	2.45333	2.52667	2.64	9.80504e-10	1	1	PF09733 VEFS-Box of polycomb protein	IPR019135 Polycomb protein, VEFS-Box
AT3G29644	7.13667	4.63333	0	0	0	0	0	0	0	0.0666667	1.02628e-09	1	1
AT5G49555	11.18	19.5333	24.0033	40.4133	23.47	35.8367	32.02	39.74	36.4	60.8767	1.06764e-09	6.71187e-08	1	PF01266 FAD dependent oxidoreductase / PF01266 FAD dependent oxidoreductase	IPR006076 FAD dependent oxidoreductase / IPR016040 NAD(P)-binding domain
AT1G63380	0.793333	1.51	0.133333	0.426667	4.02	5.97	0.103333	0.133333	0.233333	0.356667	1.27522e-09	1	1	PF00106 short chain dehydrogenase	IPR002198 Short-chain dehydrogenase/reductase SDR / IPR016040 NAD(P)-binding domain / IPR020904 Short-chain dehydrogenase/reductase, conserved site / IPR002347 Glucose/ribitol dehydrogenase
AT2G07213	0.0466667	0.03	24.61	11.7033	1.51333	0.166667	3.75667	0.8	1.03	1.28	1.30571e-09	0.377182	0.0973886
AT1G12230	38.7267	27.59	9.28	8.68333	11.2133	9.05	9.33333	10.07	11.1067	6.68667	1.35362e-09	1	1	PF00923 Transaldolase	IPR001585 Transaldolase / IPR013785 Aldolase-type TIM barrel
AT4G16830	61.6933	87.7933	54.83	101.6	40.3333	59.02	9.71333	15.8	14.7667	31.47	1.36911e-09	0.000101098	1	PF09598 Stm1 / PF04774 Hyaluronan / mRNA binding family	IPR019084 Stm1, N-terminal / IPR006861 Hyaluronan/mRNA-binding protein
AT1G11150	1.39333	1.85333	0	0	0	0	0	0	0	0	1.40844e-09	1	1
AT1G70500	0.54	0.56	0.0566667	0.0833333	0.103333	0.09	1.18667	1.15	0.0266667	0.02	1.42428e-09	1	1	PF00295 Glycosyl hydrolases family 28	IPR000743 Glycoside hydrolase, family 28 / IPR006626 Parallel beta-helix repeat / IPR012334 Pectin lyase fold / IPR011050 Pectin lyase fold/virulence factor
AT4G04692	72.9833	66.89	13.6367	14.1067	13.5767	15.3967	19.0133	24.8033	18.8133	20.1933	1.46192e-09	1	1
AT1G53480	17.41	14.12	1.03	0.246667	1.23	0.236667	0.67	0.186667	43.2633	70.6367	1.52316e-09	1	1
AT4G27050	5.97333	7.16	29.55	38.41	34.4367	36.2967	15.2867	16.1767	26.5967	44.56	1.63636e-09	0.28782	1	PF00646 F-box domain / PF07723 Leucine Rich Repeat	IPR001810 F-box domain, cyclin-like / IPR013101 Leucine-rich repeat 2 / IPR006566 FBD
AT4G35570	41.4333	53.07	7.55333	13.91	8.53	9.54667	46.1433	57.8767	11.25	21.61	1.67972e-09	1	1	PF00505 HMG (high mobility group) box 78-152	IPR009071 High mobility group (HMG) box domain
AT5G56910	13.32	11.4533	4.09	2.69	3.15667	1.56667	2.95	1.9	3.54333	3	1.75196e-09	1	1		IPR020381 Proteinase inhibitor I25, cystatin, conserved region
AT2G13975	18.15	14.5567	0	0.09	0	0	0	0	0	0	1.9792e-09	1	1
AT5G36910	12.3367	9.28333	0.35	0.286667	58.19	32.4067	171.017	66.18	43.09	5.41333	2.01669e-09	0.000389449	0.00351702	PF00321 Plant thionin	IPR001010 Thionin
AT5G09290	1.24	2.86	0.0633333	0.0266667	2.81	3.59	1.59	0.8	2.11667	18.1767	2.10792e-09	1.51904e-05	2.07834e-08	PF00459 Inositol monophosphatase family	IPR000760 Inositol monophosphatase / IPR020583 Inositol monophosphatase, metal-binding site / IPR006239 3(2),5 -bisphosphate nucleotidase HAL2
AT3G63280	0.686667	1.08667	0.53	0.943333	0.78	1.03333	0.716667	0.993333	1.80667	6.39333	2.1169e-09	6.34383e-05	6.02568e-06	PF00069 Protein kinase domain	IPR000719 Protein kinase, catalytic domain / IPR011009 Protein kinase-like domain / IPR017441 Protein kinase, ATP binding site / IPR008271 Serine/threonine-protein kinase, active site / IPR002290 Serine/threonine- / dual specificity protein kinase, catalytic domain / IPR020635 Tyrosine-protein kinase, catalytic domain
AT1G35680	386.553	187.453	78.29	34.9133	407.353	193.667	375.883	240.25	387.9	141.607	2.14843e-09	3.65536e-10	0.0547954	PF00829 Ribosomal prokaryotic L21 protein	IPR001787 Ribosomal protein L21 / IPR018258 Ribosomal protein L21, conserved site
AT3G25180	0.786667	1.75333	0.836667	1.70333	16.2667	3.54333	0.0133333	0.0566667	1.46333	0.293333	2.16901e-09	0.0106421	1.16302e-06	PF00067 Cytochrome P450	IPR001128 Cytochrome P450 / IPR002401 Cytochrome P450, E-class, group I / IPR017972 Cytochrome P450, conserved site
AT1G52990	0.226667	0.0433333	0	0.0666667	0.246667	4.99667	0	0	0.476667	0	2.17084e-09	0.000350606	3.65911e-09	PF13456 Reverse transcriptase-like / PF00085 Thioredoxin	IPR013766 Thioredoxin domain / IPR012336 Thioredoxin-like fold / IPR017937 Thioredoxin, conserved site / IPR012337 Ribonuclease H-like domain / IPR005746 Thioredoxin
AT4G24860	0.163333	0.176667	0.916667	1.16333	0.743333	0.676667	0.113333	0.19	0.176667	0.0333333	2.28657e-09	1	1	PF00004 ATPase family associated with various cellular activities (AAA)	IPR003959 ATPase, AAA-type, core / IPR003593 AAA+ ATPase domain / IPR003960 ATPase, AAA-type, conserved site / IPR027417 P-loop containing nucleoside triphosphate hydrolase
AT5G63020	12.2867	14.5267	0.736667	0.28	13.93	14.9067	17.89	14.7	1.09333	0.24	2.34157e-09	1	1	PF00931 NB-ARC domain / PF13855 Leucine rich repeat	IPR002182 NB-ARC / IPR027417 P-loop containing nucleoside triphosphate hydrolase / IPR000767 Disease resistance protein
AT5G17800	0.0233333	0.186667	0.176667	0.893333	0.03	0.29	0.153333	0.573333	0.343333	4.43667	2.34642e-09	9.29755e-08	2.97932e-08	PF13921 Myb-like DNA-binding domain	IPR009057 Homeodomain-like / IPR017930 Myb domain / IPR001005 SANT/Myb domain
AT3G42658	0.103333	0.19	11.74	14.05	25.5033	27.1333	7.59667	9.61	13.8833	24.2567	2.41311e-09	1	1
AT3G43540	41.85	38.1833	9.90667	9.02333	9.18	8.29667	2.46	2.02	44.7533	31.1933	2.55675e-09	1	1	PF07082 Protein of unknown function (DUF1350)	IPR010765 Protein of unknown function DUF1350
AT3G53710	20.7	25.34	6.37333	6.19333	8.15	7.08333	7.78	6.77333	6.69667	9.64667	2.65153e-09	1	1	PF01412 Putative GTPase activating protein for Arf / PF01412 Putative GTPase activating protein for Arf	IPR001164 Arf GTPase activating protein
AT1G47950	0.01	0.0333333	0.07	0.266667	0.203333	3.58667	0	0	0.0766667	0.0133333	2.72896e-09	3.18218e-05	1.65429e-08
AT2G38140	382.247	198.613	62.05	33.4067	53.87	31.5333	356.027	252.61	54.75	23.9833	2.91954e-09	0.061499	1
AT4G11630	12.9833	14.1833	2.80333	1.87667	5.01333	2.35333	4.16333	2.49667	6.38333	10.8733	2.93677e-09	1	1	PF01245 Ribosomal protein L19	IPR001857 Ribosomal protein L19 / IPR008991 Translation protein SH3-like domain
AT1G67700	346.677	261.243	132.573	82.3967	129.863	86.8533	118.827	110.013	113.827	57.6067	2.96041e-09	0.0462694	1
AT2G13970	4.98	6.32333	0.02	0.0133333	0.0166667	0.0233333	0	0.0266667	0	0	3.2466e-09	1	1
AT1G52980	31.8933	24.3267	11.6767	10.2467	34.43	33.2533	9.41	8.24667	46.6967	50.21	3.28517e-09	1	1	PF08153 NGP1NT (NUC091) domain / PF01926 GTPase of unknown function / PF01926 GTPase of unknown function	IPR012971 Nucleolar GTP-binding protein 2, N-terminal domain / IPR006073 GTP binding domain / IPR024929 Nucleolar GTP-binding protein 2 / IPR023179 GTP-binding protein, orthogonal bundle domain / IPR027417 P-loop containing nucleoside triphosphate hydrolase
AT2G04066	0.24	0.24	0.23	0.16	0.143333	0.17	0.5	0.07	3.01	6.40667	3.56342e-09	1	0.0464958	PF01554 MatE	IPR002528 Multi antimicrobial extrusion protein
AT1G51430	9.53333	10.05	5.17	7.88333	27.3167	28.7033	0.0533333	0.07	14.38	17.2767	3.67777e-09	1	1
AT1G25083	0.04	0.11	0.553333	0.15	16.92	7.31667	0.106667	0.0566667	8.72	10.1067	3.68515e-09	1	0.0859493	PF00117 Glutamine amidotransferase class-I	IPR017926 Glutamine amidotransferase / IPR006221 Anthranilate synthase/para-aminobenzoate synthase like domain
AT5G36170	37.7133	38.5267	44.75	46.21	23.4067	19.27	43.7667	47.5933	19.06	15.4967	3.843e-09	1	1	PF00472 RF-1 domain / PF03462 PCRF domain	IPR000352 Peptide chain release factor class I/class II / IPR005139 Peptide chain release factor / IPR004374 Peptide chain release factor 2 / IPR014720 Double-stranded RNA-binding-like domain
AT5G27250	1.13667	1.26333	0	0	0	0	0	0	0	0	3.88697e-09	1	1
AT1G66950	0	0	0	0	0	0	0	0	1.13667	0.19	3.98561e-09	0.00528012	2.1969e-06	PF00005 ABC transporter / PF00005 ABC transporter / PF01061 ABC-2 type transporter / PF01061 ABC-2 type transporter / PF08370 Plant PDR ABC transporter associated / PF00005 ABC transporter / PF00005 ABC transporter / PF14510 ABC-transporter extracellular N-terminal	IPR003439 ABC transporter-like / IPR013525 ABC-2 type transporter / IPR013581 Plant PDR ABC transporter associated / IPR027417 P-loop containing nucleoside triphosphate hydrolase / IPR003593 AAA+ ATPase domain
AT5G27990	24.0033	16.7967	1.23	0.37	23.0367	24.16	21.43	22.2533	0.873333	1.34667	4.08996e-09	1	1	PF10273 Pre-rRNA-processing protein TSR2	IPR019398 Pre-rRNA-processing protein TSR2
AT5G16570	10.0433	11.8467	10.65	15.9867	9.38	7.89333	7.16667	8.79333	3.33667	92.1233	4.28883e-09	3.53903e-07	2.81844e-10	PF00120 Glutamine synthetase, catalytic domain / PF03951 Glutamine synthetase, beta-Grasp domain	IPR008146 Glutamine synthetase, catalytic domain / IPR008147 Glutamine synthetase, beta-Grasp / IPR014746 Glutamine synthetase/guanido kinase, catalytic domain / IPR027302 Glutamine synthetase, N-terminal conserved site / IPR027303 Glutamine synthetase, glycine-rich site
AT5G46250	53.93	67.8267	16.9233	19.71	22.1733	21.9433	18.3833	23.9133	57.3367	117.77	4.40046e-09	0.0752891	0.0345185	PF00076 RNA recognition motif. (a.k.a. RRM, RBD, or RNP domain) / PF05383 La domain	IPR000504 RNA recognition motif domain / IPR006630 RNA-binding protein Lupus La / IPR002344 Lupus La protein / IPR011991 Winged helix-turn-helix DNA-binding domain / IPR012677 Nucleotide-binding, alpha-beta plait
AT1G59359	67.09	45.9033	2.24333	0.853333	24.9033	18.4033	0.626667	0.44	9.81667	13.7067	4.5578e-09	1	1	PF03719 Ribosomal protein S5, C-terminal domain / PF00333 Ribosomal protein S5, N-terminal domain	IPR005324 Ribosomal protein S5, C-terminal / IPR013810 Ribosomal protein S5, N-terminal / IPR018192 Ribosomal protein S5, N-terminal, conserved site / IPR005711 Ribosomal protein S5, eukaryotic/archaeal / IPR000851 Ribosomal protein S5 / IPR014720 Double-stranded RNA-binding-like domain / IPR014721 Ribosomal protein S5 domain 2-type fold, subgroup / IPR020568 Ribosomal protein S5 domain 2-type fo…
AT5G42730	3.85333	5.37667	0.0366667	0.0266667	0.2	0.29	0	0	0.123333	0.326667	4.68569e-09	1	1
AT5G43170	3.41	2.12	0.0533333	0	0.526667	0.353333	0.523333	0.153333	0	0	4.86189e-09	1	1	PF13912 C2H2-type zinc finger / PF13912 C2H2-type zinc finger	IPR013087 Zinc finger C2H2-type/integrase DNA-binding domain / IPR015880 Zinc finger, C2H2-like / IPR007087 Zinc finger, C2H2
AT5G35753	1.44667	2.47667	0.0233333	0.0133333	0	0	2.33333	1.86667	0	0	5.00022e-09	1	1	PF11926 Domain of unknown function (DUF3444)	IPR024593 Domain of unknown function DUF3444
AT1G52905	20.3433	14.18	0.756667	0.126667	9.68	4.96333	4.41667	3.56667	6.13333	12.2933	5.22781e-09	1	0.116989
AT1G58983	65.54	43.7133	2.14	0.99	24.7	16.76	0.863333	0.566667	8.21333	12.7733	5.6417e-09	1	1	PF03719 Ribosomal protein S5, C-terminal domain / PF00333 Ribosomal protein S5, N-terminal domain	IPR005324 Ribosomal protein S5, C-terminal / IPR013810 Ribosomal protein S5, N-terminal / IPR018192 Ribosomal protein S5, N-terminal, conserved site / IPR005711 Ribosomal protein S5, eukaryotic/archaeal / IPR000851 Ribosomal protein S5 / IPR020568 Ribosomal protein S5 domain 2-type fold / IPR014720 Double-stranded RNA-binding-like domain / IPR014721 Ribosomal protein S5 domain 2-type fold, subgro…
AT3G29734	0	0.04	5.97667	10.75	0	0.0266667	0.02	0	0	0	5.8513e-09	1	1
AT1G73885	169.647	146.587	159.987	125.9	167.94	119.513	13.4167	13.2533	17.5733	14.7433	5.87287e-09	1	1
AT3G53530	7.57333	7.12333	1.8	1.87667	0.84	1.55333	0.353333	1.26333	0.4	0.353333	6.23423e-09	1	1	PF00403 Heavy-metal-associated domain / PF00403 Heavy-metal-associated domain	IPR006121 Heavy metal-associated domain, HMA / IPR016578 Copper chaperone, chloroplast-targeted, predicted
AT5G22880	64.0867	51.3933	2.42	1.02333	5.76333	4.87667	5.52	5.72	11.3767	9.36333	6.5572e-09	1	1	PF00125 Core histone H2A/H2B/H3/H4	IPR007125 Histone core / IPR000558 Histone H2B / IPR009072 Histone-fold
AT4G27070	4.77333	4.65333	11.3967	7.36333	11.4333	8.45	8.55333	5.57667	23.8667	15.2533	6.67023e-09	0.00463354	1	PF00291 Pyridoxal-phosphate dependent enzyme / PF00291 Pyridoxal-phosphate dependent enzyme	IPR001926 Tryptophan synthase beta subunit-like PLP-dependent enzymes superfamily / IPR006653 Tryptophan synthase, beta chain, conserved site / IPR006654 Tryptophan synthase, beta chain / IPR023026 Tryptophan synthase beta chain/beta chain-like
AT5G25230	0.166667	0.16	2.34333	2.18	2.69	2.23667	0.273333	0.593333	0.23	0.236667	7.07697e-09	1	1	PF00679 Elongation factor G C-terminus / PF00009 Elongation factor Tu GTP binding domain / PF03144 Elongation factor Tu domain 2 / PF03764 Elongation factor G, domain IV	IPR000640 Translation elongation factor EFG, V domain / IPR000795 Elongation factor, GTP-binding domain / IPR004161 Translation elongation factor EFTu/EF1A, domain 2 / IPR005517 Translation elongation factor EFG/EF2, domain IV / IPR020568 Ribosomal protein S5 domain 2-type fold / IPR009000 Translation elongation/initiation factor/Ribosomal, beta-barrel / IPR014721 Ribosomal protein S5 domain 2-ty…
AT3G28840	1.65	1.61667	0.03	0	0.0233333	0	0	0.0233333	0.0233333	0.02	7.08667e-09	1	1	PF06746 Protein of unknown function (DUF1216)	IPR009605 Domain of unknown function DUF1216
AT4G05050	561.39	651.737	17.45	8.73	13.07	9.18333	192.247	133.017	11.16	17.9133	7.27194e-09	1	1	PF00240 Ubiquitin family / PF00240 Ubiquitin family / PF00240 Ubiquitin family	IPR000626 Ubiquitin / IPR019954 Ubiquitin conserved site / IPR019955 Ubiquitin supergroup / IPR019956 Ubiquitin subgroup
AT3G23840	12.1567	15.1867	3.13	3.68333	2.17333	2.30667	11.6367	21.3267	2.89	1.87333	7.59008e-09	1	1	PF02458 Transferase family	IPR003480 Transferase / IPR023213 Chloramphenicol acetyltransferase-like domain
AT3G44880	38.3567	56.8667	5.63	9.91667	7.55	11.41	47.4833	58.83	6.44667	10.7367	7.9767e-09	1	1	PF08417 Pheophorbide a oxygenase / PF00355 Rieske [2Fe-2S] domain	IPR013626 Pheophorbide a oxygenase / IPR017941 Rieske [2Fe-2S] iron-sulphur domain
AT5G09600	23.3967	33.5333	38.5033	66.1733	96.75	130.067	36.3167	34.83	39.2533	54.4367	8.08873e-09	0.252611	1	PF01127 Succinate dehydrogenase cytochrome b subunit	IPR000701 Succinate dehydrogenase/Fumarate reductase, transmembrane subunit
AT1G60560	3.59333	4.35	11.9133	13.7533	7.59333	8.3	17.6467	17.8967	5.33333	7.95333	8.12097e-09	1	1
AT1G47640	18.45	19.2533	10.0433	9.02333	25.4	25.7567	8.11667	9.97	19.3967	40.0033	8.47858e-09	0.38963	0.00336841	PF09767 Predicted membrane protein (DUF2053)	IPR019164 Protein of unknown function DUF2053, membrane
AT4G22320	4.04667	2.37	0.83	0.61	0.52	0.626667	2.64	1.64333	0.57	0.446667	9.57274e-09	0.434994	1
AT3G62530	252.753	133.95	290.99	195.877	325.66	219.913	2.43667	1.01	268.493	264.397	9.99361e-09	0.0460797	1	PF13646 HEAT repeats / PF13646 HEAT repeats	IPR016024 Armadillo-type fold / IPR004155 PBS lyase HEAT-like repeat / IPR011989 Armadillo-like helical
AT1G29810	11.42	12.68	0.71	1.56333	0.946667	1.00667	0.896667	1.49333	1.25333	2.12333	1.0235e-08	1	1	PF01329 Pterin 4 alpha carbinolamine dehydratase	IPR001533 Transcriptional coactivator/pterin dehydratase
AT1G29785	5.48667	4.96667	0.0633333	0.0466667	0.356667	0.1	0.266667	0.186667	0.166667	0.426667	1.0342e-08	1	1
AT2G18910	18.9833	16.1633	17.46	14.3233	18.3067	20.1867	5.01	3.23667	4.49333	5.09667	1.04023e-08	1	1
AT5G40810	77.5433	65.6367	82.9967	69.5633	77.2267	65.8367	24.45	23.07	105.033	90.6933	1.06034e-08	1	1	PF02167 Cytochrome C1 family	IPR002326 Cytochrome c1 / IPR009056 Cytochrome c domain / IPR021157 Cytochrome c1, transmembrane anchor, C-terminal
AT5G03010	0.156667	0.0933333	0.13	0.12	1.44667	1.19667	0.0633333	0	2.01	2.44667	1.08111e-08	1	1	PF01344 Kelch motif 52-94 96-142 144-186 188-234	IPR006652 Kelch repeat type 1 / IPR015916 Galactose oxidase, beta-propeller
AT5G37360	100.837	116.07	38.4433	49.34	32.42	67.1833	29.3233	50.5967	122.197	101.87	1.09679e-08	1	1
AT5G44565	5.60667	8.68333	0.15	0.43	0.323333	0.33	0.143333	0	0.296667	0.59	1.33304e-08	1	1
AT4G14410	26.89	32.35	24.7	30.9833	6.79	11.7167	18.5333	23.9	6.47333	9.45333	1.34464e-08	0.448701	1	PF00010 Helix-loop-helix DNA-binding domain / PF00010 Helix-loop-helix DNA-binding domain	IPR011598 Myc-type, basic helix-loop-helix (bHLH) domain
AT1G15885	4.79333	3.94333	0.08	0	0	0	0	0	0	0	1.35274e-08	1	1
AT4G03230	1.05333	2.21	0.226667	0.23	0.173333	0.09	0.16	0.113333	0.16	0.143333	1.39487e-08	1	0.0880028	PF00069 Protein kinase domain / PF00954 S-locus glycoprotein family / PF01453 D-mannose binding lectin / PF07714 Protein tyrosine kinase / PF08276 PAN-like domain / PF11883 Domain of unknown function (DUF3403)	IPR021820 S-locus receptor kinase, C-terminal / IPR013227 PAN-2 domain / IPR000858 S-locus glycoprotein / IPR001480 Bulb-type lectin domain / IPR000719 Protein kinase, catalytic domain / IPR008271 Serine/threonine-protein kinase, active site / IPR003609 Apple-like / IPR002290 Serine/threonine- / dual specificity protein kinase, catalytic domain / IPR020635 Tyrosine-protein kinase, catalytic domai…
AT5G03440	6.31	8.31667	17.3767	32.71	20.0333	21.91	3.44667	4.29333	3.14	4.07	1.42292e-08	1	1	PF13259 Protein of unknown function (DUF4050) / PF13259 Protein of unknown function (DUF4050)	IPR025124 Domain of unknown function DUF4050
AT2G10931	1.32	1.45	0	0	0	0	0	0	0	0	1.43354e-08	1	1
AT5G45420	16.6567	22.2733	25.6	25.48	22.4967	29.22	4.97667	6.08333	25.3667	32.63	1.4733e-08	1	1		IPR009057 Homeodomain-like / IPR001005 SANT/Myb domain / IPR017877 Myb-like domain
AT1G63900	19.2633	24.0833	3.45333	4.69333	19.1267	25.37	21.2667	20.3833	3.41	6.11333	1.50932e-08	1	1	PF13920 Zinc finger, C3HC4 type (RING finger) / PF12483 E3 Ubiquitin ligase	IPR022170 E3 Ubiquitin ligase / IPR013083 Zinc finger, RING/FYVE/PHD-type / IPR001841 Zinc finger, RING-type
AT3G45443	4.54667	7.08333	1.02333	1.7	1.07667	1.19	9.35667	17.8233	1.60333	2.65333	1.53602e-08	0.546227	1
AT3G47680	7.18	15.1167	0.0533333	0	0	0	0	0	0	0.0266667	1.53884e-08	1	0.60428	PF14303 No apical meristem-associated C-terminal domain
AT5G25920	0.07	0.04	0.13	0.03	0.0433333	0	1.37	1.24667	1.64	1.35	1.57777e-08	1	1
AT1G32910	0.0933333	0.176667	0.08	0.306667	4.61333	1.34333	0	0.0266667	0.0266667	0.03	1.60259e-08	1	0.000305064	PF02458 Transferase family	IPR003480 Transferase / IPR023213 Chloramphenicol acetyltransferase-like domain
AT3G29375	9.80667	11.2467	11.5167	13.2967	7.60667	8.74333	2.00333	2.04	2.34	2.08667	1.63902e-08	1	1	PF03469 XH domain	IPR005379 Uncharacterised domain XH
AT1G67105	0.593333	1.64333	2.59333	3.11333	0.0966667	0.29	3.88	7.22333	0.0466667	0.43	1.70339e-08	0.630868	1
AT3G61020	2	2.22333	0.0666667	0	0	0	1.76667	3.28667	0	0	1.72734e-08	1	1
AT5G49540	27.03	32.63	26.1767	39.6567	30.2733	39.1667	8.41	10.82	8.98	18.28	1.73713e-08	0.00633541	1	PF07019 Rab5-interacting protein (Rab5ip)	IPR008504 Transmembrane protein 93
AT3G30875	0.0433333	0.173333	0.0933333	0.14	0.9	0.543333	0.0966667	0.113333	0.08	0.0266667	1.86637e-08	1	1
AT4G32230	0	0	4.15667	5.61333	3.28333	5.10333	0	0	0.153333	0.0733333	1.92067e-08	1	1
AT1G36920	0.106667	0.143333	0.133333	0.533333	6.76667	15.8967	0.42	0.426667	0.12	0.836667	1.96129e-08	1	0.126835
AT4G04223	20.5133	26.91	7.82333	18.8633	18.7967	35.8833	120.273	136.98	77.8133	158.883	2.07349e-08	1	1
AT4G19500	10.4167	14.5533	14.0267	18.5967	15.1067	16.9133	0.12	0.0766667	0.326667	0.3	2.20848e-08	1	1	PF00931 NB-ARC domain / PF00931 NB-ARC domain / PF01582 TIR domain / PF01582 TIR domain / PF04852 Protein of unknown function (DUF640) / PF04852 Protein of unknown function (DUF640) / PF07725 Leucine Rich Repeat / PF12799 Leucine Rich repeats (2 copies)	IPR006936 Domain of unknown function DUF640 / IPR011713 Leucine-rich repeat 3 / IPR002182 NB-ARC / IPR000157 Toll/interleukin-1 receptor homology (TIR) domain / IPR025875 Leucine rich repeat 4 / IPR003593 AAA+ ATPase domain / IPR027417 P-loop containing nucleoside triphosphate hydrolase / IPR000767 Disease resistance protein
AT4G21650	20.3267	31.6567	61.2233	80.1967	1.14	7.53	0.863333	2.55	61.6567	47.8667	2.28114e-08	1	1	PF05922 Peptidase inhibitor I9 / PF00082 Subtilase family	IPR010259 Proteinase inhibitor I9 / IPR000209 Peptidase S8/S53 domain / IPR023828 Peptidase S8, subtilisin, Ser-active site / IPR015500 Peptidase S8, subtilisin-related
AT4G09670	33.6767	30.84	36.0033	37.0467	16.9	17.53	12.4133	12.0233	13.6667	15.6933	2.29037e-08	1	1	PF02894 Oxidoreductase family, C-terminal alpha/beta domain / PF01408 Oxidoreductase family, NAD-binding Rossmann fold	IPR004104 Oxidoreductase, C-terminal / IPR000683 Oxidoreductase, N-terminal / IPR016040 NAD(P)-binding domain
AT5G60440	0.48	1.19333	0.316667	2.43333	1.02	1.65667	0.0933333	0.203333	1.15333	6.51667	2.31676e-08	1.94729e-07	3.313e-06	PF00319 SRF-type transcription factor (DNA-binding and dimerisation domain)	IPR002100 Transcription factor, MADS-box
AT1G78450	12.0767	14.5833	121.917	126.823	31.7067	31.5333	89.8133	82.7167	37.0067	20.6233	2.37781e-08	1	1	PF04832 SOUL heme-binding protein	IPR006917 SOUL haem-binding protein / IPR011256 Regulatory factor, effector, bacterial
AT1G34418	34.9067	36.1733	0.49	0.116667	25.5433	27.7033	0	0	43.23	87.7133	2.54822e-08	1	0.813225
AT2G37370	0.0133333	0.02	0.263333	1.20667	0.606667	0.763333	0.52	1.02	0.79	5.68	2.55327e-08	7.9004e-06	9.74121e-07
AT1G80980	3.65333	9.56667	0	0	0	0	0	0.0666667	0	0.06	2.61411e-08	1	0.0348307
AT5G51730	7.08667	9.23667	1.65667	2.03	1.88333	2.11	8.65333	9.19333	3.28667	4.09667	2.65597e-08	1	1		IPR012677 Nucleotide-binding, alpha-beta plait
AT1G52290	15.1133	23.3467	1.05	1.91333	20.86	25.8	16.9967	18.06	26.58	40.5033	2.67162e-08	0.585822	1	PF07714 Protein tyrosine kinase	IPR001245 Serine-threonine/tyrosine-protein kinase catalytic domain / IPR013320 Concanavalin A-like lectin/glucanase, subgroup / IPR011009 Protein kinase-like domain / IPR002290 Serine/threonine- / dual specificity protein kinase, catalytic domain / IPR020635 Tyrosine-protein kinase, catalytic domain / IPR000719 Protein kinase, catalytic domain / IPR017441 Protein kinase, ATP binding site
AT5G43280	13.0867	18.5967	16.37	21.1733	2.84	3.54	4.18333	4.42333	3.49667	7.26	2.71928e-08	1	1	PF00378 Enoyl-CoA hydratase/isomerase family	IPR001753 Crotonase superfamily / IPR018376 Enoyl-CoA hydratase/isomerase, conserved site / IPR014748 Crontonase, C-terminal
AT2G16510	62.8667	50.3133	67.3567	63.2667	65.86	61.8	23.09	24.45	69.0233	83.31	2.74429e-08	1	1	PF00137 ATP synthase subunit C / PF00137 ATP synthase subunit C	IPR002379 V-ATPase proteolipid subunit C-like domain / IPR011555 V-ATPase proteolipid subunit C, eukaryotic / IPR000245 V-ATPase proteolipid subunit
AT5G21090	175.847	244.34	188.757	295.07	48.1633	49.8033	45.6733	48.53	43.9767	99.27	2.85989e-08	0.651248	1	PF08263 Leucine rich repeat N-terminal domain / PF12799 Leucine Rich repeats (2 copies) / PF13504 Leucine rich repeat	IPR013210 Leucine-rich repeat-containing N-terminal, type 2 / IPR025875 Leucine rich repeat 4
AT4G26570	29.2867	30.5933	7.13667	8.58667	7.02333	9.15	6.58	9.02667	27.1667	49.3867	2.86568e-08	1	1	PF13833 EF-hand domain pair / PF13499 EF-hand domain pair	IPR002048 EF-hand domain / IPR011992 EF-hand-like domain / IPR001125 Recoverin
AT3G31475	0	0	0	0	1.44	1.32667	0	0	0	0.136667	2.88741e-08	1	1
AT5G42825	33.22	73.54	0.33	0.04	0	0.08	13.3333	46.25	0	0.28	2.94818e-08	0.0513033	0.102747
AT1G09490	21.61	31.3433	21.4833	32.7967	22.4367	31.02	1.99	3.69667	27.9333	23.28	2.99941e-08	0.571804	1	PF01370 NAD dependent epimerase/dehydratase family	IPR001509 NAD-dependent epimerase/dehydratase / IPR016040 NAD(P)-binding domain
AT5G35935	1.29	1.56	0.0266667	0.00666667	1.01667	0.993333	0	0.01	0.0333333	0.0233333	3.09747e-08	1	1
AT1G23950	18.9333	18.3567	18.69	27.5633	19.4267	24.82	3.68	1.7	1.73333	3.22333	3.2098e-08	1	1	PF04776 Protein of unknown function (DUF626) / PF04776 Protein of unknown function (DUF626)	IPR006462 Protein of unknown function DUF626, Arabidopsis thaliana
AT1G66250	5.13333	7.25667	8.17333	9.14667	1.12	2.34	2.42667	2.61	6.38667	9.85667	3.21265e-08	0.636355	1	PF00332 Glycosyl hydrolases family 17 / PF07983 X8 domain	IPR000490 Glycoside hydrolase, family 17 / IPR012946 X8 / IPR017853 Glycoside hydrolase, superfamily / IPR013781 Glycoside hydrolase, catalytic domain
AT1G13350	9.77	13.1233	13.6667	19.2567	2.59333	2.91333	15.68	13.8267	3.82	4.35667	3.33918e-08	1	1	PF00069 Protein kinase domain	IPR000719 Protein kinase, catalytic domain / IPR002290 Serine/threonine- / dual specificity protein kinase, catalytic domain / IPR020635 Tyrosine-protein kinase, catalytic domain / IPR011009 Protein kinase-like domain / IPR008271 Serine/threonine-protein kinase, active site
AT3G28915	0.136667	1.16	0	0	0	0	0	0	0	0.00666667	3.41297e-08	0.00566812	2.77523e-06
AT1G52347	11.48	12.44	0.273333	0	0	0	0	0	0	0.196667	3.49562e-08	1	1
AT1G58684	65.7167	42.9333	1.89	0.653333	24.9133	17.0967	1.05667	0.716667	8.63333	12.95	3.61411e-08	1	1	PF03719 Ribosomal protein S5, C-terminal domain / PF00333 Ribosomal protein S5, N-terminal domain	IPR005324 Ribosomal protein S5, C-terminal / IPR013810 Ribosomal protein S5, N-terminal / IPR000851 Ribosomal protein S5 / IPR018192 Ribosomal protein S5, N-terminal, conserved site / IPR005711 Ribosomal protein S5, eukaryotic/archaeal / IPR020568 Ribosomal protein S5 domain 2-type fold / IPR014720 Double-stranded RNA-binding-like domain / IPR014721 Ribosomal protein S5 domain 2-type fold, subgro…
AT1G80900	2.63667	4.27	2.56667	5.03667	5.69	7.38	6.18	7.43667	5.90667	10.1933	3.68729e-08	2.9666e-06	1	PF01544 CorA-like Mg2+ transporter protein / PF01544 CorA-like Mg2+ transporter protein	IPR002523 Mg2+ transporter protein, CorA-like/Zinc transport protein ZntB / IPR026573 Magnesium transporter MRS2/LPE10
AT5G02740	13.2033	15.74	13.79	14.5333	14.3767	16.5033	23.5467	22.2967	26.7667	40.8033	3.69953e-08	1	1
AT5G63450	0.0166667	0.21	0.62	0.276667	19.79	0.74	1.53333	1.13667	2.25667	0.08	3.71014e-08	1.84708e-05	7.12606e-08	PF00067 Cytochrome P450	IPR001128 Cytochrome P450 / IPR002401 Cytochrome P450, E-class, group I
AT4G04293	5.08	7.85333	26.1567	21.3167	27.5133	25.87	93.8933	79.91	20.7767	14.9533	3.72525e-08	1	1
AT1G34270	4.57333	5.43	0.463333	0.473333	5.26	5.76333	5.03333	6.21667	0.613333	0.69	3.83025e-08	1	1	PF03016 Exostosin family	IPR004263 Exostosin-like
AT1G24909	0.03	0.08	0.386667	0.136667	11.75	4.90333	0.166667	0.0433333	5.46	5.84667	3.8502e-08	1	0.25788	PF00117 Glutamine amidotransferase class-I	IPR017926 Glutamine amidotransferase / IPR006221 Anthranilate synthase/para-aminobenzoate synthase like domain
AT3G14210	1310.45	1279.48	86.7267	35.33	46.68	29.2933	43.5467	55.1067	25.65	18.77	3.91142e-08	1	1	PF00657 GDSL-like Lipase/Acylhydrolase	IPR001087 Lipase, GDSL / IPR013831 SGNH hydrolase-type esterase domain
AT3G24890	2.98667	3.59333	0	0	0	0	0.536667	0.95	0	0	3.9393e-08	1	1	PF00957 Synaptobrevin	IPR001388 Synaptobrevin
AT1G47820	8.65667	6.91333	0.96	1.39	8.33	9.73	0.76	0.426667	11.06	19.1033	4.042e-08	1	1
AT5G65050	18.56	35.84	3.67333	6.73	10.5167	14.2733	15.59	29	15.1333	45.4667	4.20469e-08	2.92319e-07	0.00291686	PF00319 SRF-type transcription factor (DNA-binding and dimerisation domain) / PF01486 K-box region	IPR002100 Transcription factor, MADS-box / IPR002487 Transcription factor, K-box
AT5G22510	45.3833	52.1067	20.8467	24.2733	24.9	28.76	58.4067	55.7067	58.8433	47.69	4.2191e-08	1	1	PF12899 Alkaline and neutral invertase	IPR024746 Glycosyl hydrolase family 100 / IPR008928 Six-hairpin glycosidase-like
AT1G48840	4.45333	6.75	6.61	7.79333	16.0033	18.5733	14.5233	16.9333	7.48	2.92667	4.52377e-08	1	1	PF04842 Plant protein of unknown function (DUF639)	IPR006927 Protein of unknown function DUF639
AT5G59690	110.983	73.23	0.93	0.1	0.126667	0	6.60333	4.24	2.59	2.78	4.56671e-08	1	1	PF00125 Core histone H2A/H2B/H3/H4	IPR007125 Histone core / IPR001951 Histone H4 / IPR019809 Histone H4, conserved site / IPR009072 Histone-fold
AT4G08035	17.1267	25.88	5.58	5.45667	5.39	5.18667	4.82667	4.22333	4.81	6.16	4.59546e-08	1	1
AT1G48380	4.57333	7.22	1.96333	2.44333	7.46667	7.95667	1.56	2.85333	9.33	13.3767	4.634e-08	1	1
AT3G27610	4.50333	7.14667	0.786667	1.88333	1.21667	1.11333	0.496667	0.613333	1.07	1.86667	4.76132e-08	1	1		IPR014729 Rossmann-like alpha/beta/alpha sandwich fold
AT1G24880	61.98	66.4567	1.94	0.303333	0.293333	0.496667	0.17	0.156667	0.26	0.626667	4.77185e-08	1	1	PF03331 UDP-3-O-acyl N-acetylglycosamine deacetylase	IPR004463 UDP-3-O-acyl N-acetylglucosamine deacetylase / IPR020568 Ribosomal protein S5 domain 2-type fold / IPR015870 UDP-3-O-acyl N-acetylglucosamine deacetylase, N-terminal / IPR011334 UDP-3-O-acyl N-acetylglucosamine deacetylase, C-terminal
AT5G37350	9.19333	11.15	8.70667	10.81	5.54	6.93667	5.83667	5.77	13.3367	20.7033	4.85328e-08	0.177842	1	PF01163 RIO1 family	IPR018934 RIO-like kinase / IPR011009 Protein kinase-like domain / IPR000687 RIO kinase / IPR017407 Serine/threonine-protein kinase Rio1 / IPR018935 RIO kinase, conserved site
AT4G09310	4.82667	6.06	0.0266667	0	0	0	0	0	3.26	6.09667	4.97221e-08	1	1	PF10607 Ran binding protein in the microtubule-organising centre / PF00622 SPRY domain	IPR024964 CTLH/CRA C-terminal to LisH motif domain / IPR003877 SPla/RYanodine receptor SPRY / IPR008985 Concanavalin A-like lectin/glucanases superfamily / IPR001870 B30.2/SPRY domain / IPR006594 LisH dimerisation motif / IPR006595 CTLH, C-terminal LisH motif / IPR018355 SPla/RYanodine receptor subgroup / IPR013144 CRA domain
AT2G40955	0	0	0	0	0.546667	0.433333	0	0.0566667	2.56667	1.50667	4.99935e-08	1	1
AT2G03780	9.83667	10.4167	1.22	1.75333	1.46333	2.19667	11.21	11.2767	10.8467	20.2733	5.1487e-08	1	1	PF01997 Translin family	IPR002848 Translin / IPR016068 Translin, N-terminal / IPR016069 Translin, C-terminal
AT2G41440	2.01	1.73	0.0566667	0.0466667	0	0	0	0	0	0.08	5.27571e-08	1	1
AT1G80910	9.17667	12.4933	8.71333	10.5633	10.3367	11.6333	10.3367	9.71	17.4667	37.4167	5.73235e-08	0.0189318	0.00255634	PF08217 Fungal domain of unknown function (DUF1712)	IPR013176 Protein of unknown function DUF1712, fungi
AT4G38932	31.3167	42.5967	0.766667	1.06667	4.87333	7.30333	35.6633	128.78	2.11333	9.85	5.73602e-08	0.0206334	0.00114961
AT4G21800	22.07	26.5133	7.16	8.37333	25.3567	24.5067	34.47	25.5467	8.94333	16.2533	5.88221e-08	1	1	PF03029 Conserved hypothetical ATP binding protein	IPR004130 Uncharacterised protein family, ATP binding / IPR027417 P-loop containing nucleoside triphosphate hydrolase
AT5G43500	4.44333	5.92333	10.9433	16.2233	13.45	18.0033	11.94	13.13	6.85	9.11	5.90592e-08	0.0152465	1	PF00022 Actin	IPR004000 Actin-related protein / IPR027668 Actin-related protein 8/Plant actin-related protein 9
AT5G49440	55.6067	49.84	1.22333	0	0.08	0.0366667	0.05	0.126667	0.0733333	0.106667	6.0384e-08	1	1
AT5G43940	144.987	200.737	158.093	223.517	200.197	214.923	107.223	142.04	199.107	311.81	6.30096e-08	2.14475e-06	0.57165	PF00107 Zinc-binding dehydrogenase / PF08240 Alcohol dehydrogenase GroES-like domain	IPR013149 Alcohol dehydrogenase, C-terminal / IPR013154 Alcohol dehydrogenase GroES-like / IPR014183 Alcohol dehydrogenase class III/S-(hydroxymethyl)glutathione dehydrogenase / IPR002328 Alcohol dehydrogenase, zinc-type, conserved site / IPR011032 GroES-like / IPR002085 Alcohol dehydrogenase superfamily, zinc-type / IPR016040 NAD(P)-binding domain
AT3G44205	0.96	1.37	0.09	0.01	1.17667	0.746667	0	0	0.0133333	0.0233333	6.43355e-08	1	1
AT1G62600	14.4667	18.5967	8.5	12.7767	8.58667	8.22667	4.24333	4.06	16.1167	28.7467	6.45257e-08	0.190568	1	PF00743 Flavin-binding monooxygenase-like / PF00743 Flavin-binding monooxygenase-like	IPR020946 Flavin monooxygenase-like / IPR000960 Flavin monooxygenase FMO
AT3G46980	10.1033	15.02	1.36333	1.01667	1.47	0.893333	1.27	1.38667	0.8	1.03667	6.48091e-08	1	1	PF07690 Major Facilitator Superfamily	IPR011701 Major facilitator superfamily / IPR016196 Major facilitator superfamily domain, general substrate transporter / IPR020846 Major facilitator superfamily domain
AT1G31600	10.16	12.5467	0.886667	0.9	0.726667	1.08667	0.836667	1.71333	0.906667	1.56	6.50644e-08	1	1	PF13532 2OG-Fe(II) oxygenase superfamily / PF13893 RNA recognition motif. (a.k.a. RRM, RBD, or RNP domain) / PF13532 2OG-Fe(II) oxygenase superfamily	IPR005123 Oxoglutarate/iron-dependent dioxygenase / IPR000504 RNA recognition motif domain / IPR027450 Alpha-ketoglutarate-dependent dioxygenase AlkB-like / IPR012677 Nucleotide-binding, alpha-beta plait
AT5G65060	9.32667	20.8933	5.49667	8.13667	3.95333	5.08667	0	0	0.04	0.05	6.55106e-08	1	0.481026	PF00319 SRF-type transcription factor (DNA-binding and dimerisation domain) / PF01486 K-box region	IPR002100 Transcription factor, MADS-box / IPR002487 Transcription factor, K-box
AT3G24927	16.1833	27.9067	3.22667	9.15	7.66667	24.27	2.40333	4.69667	2.67	8.36333	6.72703e-08	1.6298e-05	1
AT1G65960	201.34	290.44	122.28	144.4	238.287	273.89	274.717	266.103	107.437	140.61	6.78702e-08	1	1	PF00282 Pyridoxal-dependent decarboxylase conserved domain	IPR002129 Pyridoxal phosphate-dependent decarboxylase / IPR010107 Glutamate decarboxylase / IPR015421 Pyridoxal phosphate-dependent transferase, major region, subdomain 1 / IPR015424 Pyridoxal phosphate-dependent transferase
AT1G50290	7.06333	6.91	10.1367	12.7267	0	0	0.0266667	0	15.99	18.4933	6.80182e-08	1	1
AT2G41480	0.84	1.04667	0.23	0.316667	2.98333	4.64	0.94	0.62	1.24	0.41	7.08169e-08	1	1	PF00141 Peroxidase 66-392	IPR002016 Haem peroxidase, plant/fungal/bacterial / IPR000823 Plant peroxidase / IPR010255 Haem peroxidase / IPR019793 Peroxidases heam-ligand binding site / IPR019794 Peroxidase, active site
AT1G51630	21.1533	27.8867	14.4567	16.52	9.57	11.6467	12.8333	15.8067	25.6367	44.9567	7.12212e-08	0.0256106	1	PF10250 GDP-fucose protein O-fucosyltransferase	IPR019378 GDP-fucose protein O-fucosyltransferase
AT5G46490	10.7233	16.2433	0.45	0.38	0.47	0.38	0.346667	0.373333	0.356667	0.313333	7.41008e-08	1	1	PF07725 Leucine Rich Repeat / PF00931 NB-ARC domain / PF01582 TIR domain	IPR011713 Leucine-rich repeat 3 / IPR002182 NB-ARC / IPR000157 Toll/interleukin-1 receptor homology (TIR) domain / IPR003593 AAA+ ATPase domain / IPR000767 Disease resistance protein / IPR027417 P-loop containing nucleoside triphosphate hydrolase
AT1G23960	21.9867	36.9167	22.0333	46.1933	7.81333	10.2	0.1	0.15	0.0766667	0.133333	7.43945e-08	0.830383	1	PF04776 Protein of unknown function (DUF626)	IPR006462 Protein of unknown function DUF626, Arabidopsis thaliana
AT5G34800	0.826667	0.7	0.0833333	0.0166667	0	0.0266667	2.34333	3.55667	0	0.02	7.64408e-08	1	1
AT3G26612	4.41667	7.05	0	0	0	0	0.06	0	0	0.06	7.6824e-08	1	1
AT3G44670	16.6967	30.2067	1.18	0.596667	0.433333	1.25	0.733333	0.853333	0.376667	0.513333	7.72772e-08	1	1	PF00560 Leucine Rich Repeat 17-38 40-61 / PF00560 Leucine Rich Repeat 17-38 40-61 / PF00560 Leucine Rich Repeat 17-38 40-61 / PF00560 Leucine Rich Repeat 17-38 40-61 / PF00931 NB-ARC domain / PF01582 TIR domain / PF07725 Leucine Rich Repeat / PF13504 Leucine rich repeat / PF13504 Leucine rich repeat / PF13504 Leucine rich repeat	IPR011713 Leucine-rich repeat 3 / IPR002182 NB-ARC / IPR000157 Toll/interleukin-1 receptor homology (TIR) domain / IPR001611 Leucine-rich repeat / IPR000767 Disease resistance protein / IPR003593 AAA+ ATPase domain / IPR027417 P-loop containing nucleoside triphosphate hydrolase
AT1G69550	5.23667	7.85667	1.43667	1.14	3.5	2.84	0.0333333	0.03	1.48333	1.04	7.83309e-08	1	1	PF00560 Leucine Rich Repeat 17-38 40-61 / PF00560 Leucine Rich Repeat 17-38 40-61 / PF00560 Leucine Rich Repeat 17-38 40-61 / PF00560 Leucine Rich Repeat 17-38 40-61 / PF00560 Leucine Rich Repeat 17-38 40-61 / PF00560 Leucine Rich Repeat 17-38 40-61 / PF00560 Leucine Rich Repeat 17-38 40-61 / PF00560 Leucine Rich Repeat 17-38 40-61 / PF00560 Leucine Rich Repeat 17-38 40-61 / PF00560 Leucine Rich …	IPR011713 Leucine-rich repeat 3 / IPR002182 NB-ARC / IPR000157 Toll/interleukin-1 receptor homology (TIR) domain / IPR001611 Leucine-rich repeat / IPR003593 AAA+ ATPase domain / IPR027417 P-loop containing nucleoside triphosphate hydrolase / IPR000767 Disease resistance protein / IPR025875 Leucine rich repeat 4
AT5G47445	1.54667	2.57333	2.14333	3.11667	3.05	3.06667	0.0133333	0.0633333	0.02	0.06	8.0058e-08	1	1
AT1G54040	16.2233	32.39	1558.77	790.917	1046.23	689.373	1311.49	1105.77	2032.29	954.933	8.00946e-08	0.000772249	0.589622	PF01344 Kelch motif 52-94 96-142 144-186 188-234 / PF01344 Kelch motif 52-94 96-142 144-186 188-234 / PF13964 Kelch motif	IPR006652 Kelch repeat type 1 / IPR015915 Kelch-type beta propeller
AT5G25470	0.89	2.29	0.106667	0.07	0.03	0.0866667	0.06	0.103333	1.34667	7.42333	8.27297e-08	0.00179799	5.62182e-05	PF02362 B3 DNA binding domain / PF02362 B3 DNA binding domain	IPR003340 B3 DNA binding domain / IPR015300 DNA-binding pseudobarrel domain
AT1G36320	51.8867	56.0733	50.6533	51.08	18.89	16.7667	63.39	53.4367	69.2667	84.18	8.62392e-08	1	1
AT2G43180	8.33333	10.3533	2.47	2.8	2.81333	3.12333	9.35667	8.73333	10.5967	13.48	8.6318e-08	1	1	PF13714 Phosphoenolpyruvate phosphomutase	IPR015813 Pyruvate/Phosphoenolpyruvate kinase-like domain
AT1G62085	2.45	2.52	0.313333	0.19	0.37	0.216667	0.35	0.233333	0.546667	0.653333	8.99115e-08	1	1	PF02536 mTERF	IPR003690 Mitochodrial transcription termination factor-related
AT1G60525	4.22333	4.64333	0.233333	0.183333	6.18	7.26	5.15	6.03333	5.67	10.2233	9.50928e-08	1	1
AT3G44590	24.2967	11.9	2.25667	0.623333	2.33333	1.05333	0.54	0.176667	1.91667	1.76	9.60379e-08	1	1	PF00428 60s Acidic ribosomal protein	IPR001813 Ribosomal protein L10/L12 / IPR027534 Ribosomal protein L12 family
AT1G48310	2.4	3.38667	2.51667	3.64	3.25667	4.01667	8.72	8.11667	5.03	6.32667	9.78783e-08	1	1	PF00176 SNF2 family N-terminal domain / PF00271 Helicase conserved C-terminal domain / PF00176 SNF2 family N-terminal domain	IPR000330 SNF2-related / IPR001650 Helicase, C-terminal / IPR014001 Helicase, superfamily 1/2, ATP-binding domain / IPR010003 HARP domain / IPR027417 P-loop containing nucleoside triphosphate hydrolase
AT1G33780	22.3067	36.26	9.66333	12.4867	5.60333	5.65667	11.2333	16.03	6.98333	17.3533	9.81443e-08	0.0106941	1	PF02622 Uncharacterized ACR, COG1678	IPR003774 Protein of unknown function UPF0301
AT2G25260	0.483333	1.2	1.16667	2.93333	3.24667	3.83667	0.4	0.463333	1.18	10.7433	1.00079e-07	7.79475e-06	1.01542e-06
AT5G48790	95.6533	76.0133	88.5567	68.2533	95.53	71.65	40.9267	44.3533	31.4467	19.7233	1.00362e-07	0.72516	1	PF09353 Domain of unknown function (DUF1995)	IPR018962 Domain of unknown function DUF1995
AT1G62850	15.3167	12.3467	16.4933	14.9633	13.36	13.4933	3.07333	2.4	19.75	18.66	1.01684e-07	1	1	PF00472 RF-1 domain	IPR000352 Peptide chain release factor class I/class II
AT1G44030	0	0	0	0	0	0	0.0233333	0.0133333	0.856667	1.17333	1.02347e-07	1	1	PF03107 C1 domain / PF07649 C1-like domain / PF07649 C1-like domain	IPR004146 DC1 / IPR011424 C1-like / IPR013083 Zinc finger, RING/FYVE/PHD-type
AT4G15420	6.3	9.71333	0.363333	0.463333	0.486667	0.666667	0.48	0.596667	0.326667	0.526667	1.04515e-07	1	1	PF04151 Bacterial pre-peptidase C-terminal domain / PF03152 Ubiquitin fusion degradation protein UFD1 / PF02176 TRAF-type zinc finger 16-75 169-225	IPR007280 Peptidase, C-terminal, archaeal/bacterial / IPR004854 Ubiquitin fusion degradation protein UFD1
AT3G22231	504.843	1169.68	47.9833	66.4433	39.7167	54.2067	3.34	2.18667	21.07	248.79	1.05486e-07	0.74413	0.418836	PF12734 Cysteine-rich TM module stress tolerance	IPR028144 Cysteine-rich transmembrane CYSTM domain
AT5G10600	4.3	4.90667	5.66667	6.09667	1.80667	1.80667	1.65667	1.21333	6.37667	5.64667	1.11657e-07	1	1	PF00067 Cytochrome P450	IPR001128 Cytochrome P450 / IPR017972 Cytochrome P450, conserved site / IPR002401 Cytochrome P450, E-class, group I
AT4G13630	4.21333	7.28333	0.33	0.97	0.1	0.406667	0.253333	0.436667	0.443333	0.766667	1.11989e-07	1	1	PF04576 Zein-binding	IPR007656 Zein-binding domain
AT1G29110	0.03	0	0.306667	0.22	2.91	1.25667	0.0633333	0	0.506667	0.09	1.1511e-07	1	0.636687	PF00112 Papain family cysteine protease / PF08246 Cathepsin propeptide inhibitor domain (I29)	IPR000668 Peptidase C1A, papain C-terminal / IPR013201 Proteinase inhibitor I29, cathepsin propeptide / IPR025661 Cysteine peptidase, asparagine active site / IPR025660 Cysteine peptidase, histidine active site / IPR013128 Peptidase C1A, papain
AT5G10610	5.49333	8.99667	7.25333	11.1333	1.52333	2.06667	1.04	1.39333	10.95	12.72	1.16477e-07	1	1	PF00067 Cytochrome P450	IPR001128 Cytochrome P450 / IPR002401 Cytochrome P450, E-class, group I / IPR017972 Cytochrome P450, conserved site
AT3G27900	0.5	0.41	0.0533333	0.286667	0.253333	0.683333	2.2	5.69333	0.09	0.423333	1.19208e-07	0.557813	0.0868385	PF06683 Protein of unknown function (DUF1184)	IPR009568 Protein of unknown function DUF1184
AT5G23460	5.61	10.97	0.116667	0	3.83	4.44333	0.82	2.14667	4.98	14.51	1.20502e-07	0.002854	0.0356791
AT5G17880	4.34667	6.49333	0.106667	0.0166667	0.01	0	0	0	0	0	1.2297e-07	1	1	PF07725 Leucine Rich Repeat / PF00931 NB-ARC domain / PF01582 TIR domain / PF13504 Leucine rich repeat	IPR011713 Leucine-rich repeat 3 / IPR002182 NB-ARC / IPR000157 Toll/interleukin-1 receptor homology (TIR) domain / IPR000767 Disease resistance protein / IPR027417 P-loop containing nucleoside triphosphate hydrolase
AT4G19630	0	0	0.06	0.09	2.28667	1.57667	5.97667	6.55333	2.80667	2.52333	1.23711e-07	1	1	PF00447 HSF-type DNA-binding / PF00447 HSF-type DNA-binding	IPR000232 Heat shock factor (HSF)-type, DNA-binding / IPR027725 Heat shock transcription factor family / IPR011991 Winged helix-turn-helix DNA-binding domain
AT3G07260	0	0.0433333	2.92333	2.95	0.37	0.64	0.0633333	0.16	2.53	3.51	1.24312e-07	1	1	PF00498 FHA domain	IPR000253 Forkhead-associated (FHA) domain / IPR008984 SMAD/FHA domain
AT3G08940	3264.06	2715.38	2977.72	3140.44	351.573	391.367	357.247	501.417	2543.74	1696.45	1.27494e-07	1	1	PF00504 Chlorophyll A-B binding protein	IPR022796 Chlorophyll A-B binding protein / IPR001344 Chlorophyll A-B binding protein, plant / IPR023329 Chlorophyll a/b binding protein domain
AT5G33330	0	0	1.25667	1.53	0	0	0	0	6.77	7.74667	1.29569e-07	1	1	PF13456 Reverse transcriptase-like	IPR012337 Ribonuclease H-like domain / IPR002156 Ribonuclease H domain
AT5G32460	0	0.0566667	2.93667	3.17	0.666667	0.526667	0.926667	0.193333	1.83667	2.35667	1.30568e-07	1	1	PF02362 B3 DNA binding domain / PF02362 B3 DNA binding domain / PF02362 B3 DNA binding domain / PF02362 B3 DNA binding domain / PF02362 B3 DNA binding domain / PF02362 B3 DNA binding domain / PF02362 B3 DNA binding domain / PF02362 B3 DNA binding domain	IPR003340 B3 DNA binding domain / IPR015300 DNA-binding pseudobarrel domain
AT2G47600	9.08333	19.87	18.3267	35.5	27.7833	36.0467	13.8333	23.77	12.75	14.3933	1.32308e-07	3.76354e-06	1	PF01699 Sodium/calcium exchanger protein / PF01699 Sodium/calcium exchanger protein / PF01699 Sodium/calcium exchanger protein	IPR004837 Sodium/calcium exchanger membrane region
AT4G27040	20.2433	25.4367	22.0667	48.4333	31.12	40.3733	17.12	20.2067	22.1867	44.0633	1.36152e-07	8.02685e-09	0.000236142	PF04157 EAP30/Vps36 family	IPR007286 EAP30 / IPR011991 Winged helix-turn-helix DNA-binding domain / IPR016689 ESCRT-2 complex, Snf8
AT1G03550	4.03667	8.31667	0.156667	0.0966667	3.42667	4.24	0.323333	0.106667	0.106667	0.12	1.39117e-07	1	1	PF04144 SCAMP family / PF04144 SCAMP family	IPR007273 SCAMP
AT1G43170	305.83	179.933	201.693	117.443	213.663	123.953	216.357	111.007	362.057	366.957	1.41671e-07	0.000384635	1	PF00297 Ribosomal protein L3	IPR000597 Ribosomal protein L3 / IPR009000 Translation elongation/initiation factor/Ribosomal, beta-barrel / IPR019926 Ribosomal protein L3, conserved site
AT1G24180	29.33	34.4267	41.8967	47.7733	39.3433	42.4867	36.6133	34.13	16.0033	19.8733	1.42118e-07	1	1	PF00676 Dehydrogenase E1 component	IPR001017 Dehydrogenase, E1 component / IPR017597 Pyruvate dehydrogenase (acetyl-transferring) E1 component, alpha subunit, subgroup y
AT4G16380	72.6267	67.8667	16.5833	22.1133	11.8333	20.3133	62.41	74.26	65.9233	88.0367	1.44605e-07	1	1		IPR006121 Heavy metal-associated domain, HMA
AT4G28910	24.2233	25.0733	8.86667	11.0167	11.5833	10.5633	26.6967	29.7933	7.56333	13.6167	1.44609e-07	1	1	PF07897 Protein of unknown function (DUF1675)	IPR012463 Protein of unknown function DUF1675
AT5G26230	4.59667	5.93	6.25667	9.59333	7.03333	9.06667	0.866667	0.933333	0.993333	0.783333	1.45269e-07	1	1
AT1G73530	49.6333	49.9033	20.8133	14.7267	20.61	13.7833	40.6033	41.47	29.6267	16.9333	1.48631e-07	1	1	PF00076 RNA recognition motif. (a.k.a. RRM, RBD, or RNP domain)	IPR000504 RNA recognition motif domain / IPR003954 RNA recognition motif domain, eukaryote / IPR012677 Nucleotide-binding, alpha-beta plait
AT1G29150	45.8767	47.13	39.8133	47.4167	20.36	21.4267	18.6267	17.8567	18.63	29.7067	1.49604e-07	1	1	PF01399 PCI domain	IPR000717 Proteasome component (PCI) domain / IPR011991 Winged helix-turn-helix DNA-binding domain / IPR013143 PCI/PINT associated module
AT1G11850	31.7633	12.1567	1.38667	0.82	1.30333	1.10333	0.803333	0.813333	1.16667	0.826667	1.50283e-07	1	0.0839968
AT3G44798	3.83333	9.44333	0.106667	0	0	0	0	0.0433333	0	0	1.51439e-07	1	0.283771
AT5G45220	0.06	0	0	0	0	0	1.36333	1.31333	0	0	1.57198e-07	1	1	PF01582 TIR domain / PF01582 TIR domain	IPR000157 Toll/interleukin-1 receptor homology (TIR) domain
AT5G56500	6.73	9.34333	12.1133	14.02	8.53333	11.92	9.46	8.2	13.07	31.84	1.61812e-07	0.00098959	0.000228705	PF00118 TCP-1/cpn60 chaperonin family / PF00118 TCP-1/cpn60 chaperonin family	IPR002423 Chaperonin Cpn60/TCP-1 / IPR027413 GroEL-like equatorial domain / IPR001844 Chaperonin Cpn60 / IPR027409 GroEL-like apical domain / IPR018370 Chaperonin Cpn60, conserved site
AT1G35190	6.49	13.6133	5.08333	10.8067	10.2967	17.2433	4.12667	6.09	9.90333	43.45	1.6282e-07	8.42077e-07	2.65309e-05	PF03171 2OG-Fe(II) oxygenase superfamily / PF14226 non-haem dioxygenase in morphine synthesis N-terminal	IPR005123 Oxoglutarate/iron-dependent dioxygenase / IPR027443 Isopenicillin N synthase-like / IPR026992 Non-haem dioxygenase N-terminal domain / IPR002283 Isopenicillin N synthase
AT5G36930	7.37667	11.5567	10.6333	11.25	0.02	0.0233333	0.02	0.0233333	4.94333	5.39333	1.67068e-07	1	1	PF00931 NB-ARC domain / PF01582 TIR domain	IPR002182 NB-ARC / IPR000157 Toll/interleukin-1 receptor homology (TIR) domain / IPR000767 Disease resistance protein / IPR027417 P-loop containing nucleoside triphosphate hydrolase
AT5G62270	11.8267	11.3667	14.2167	11.9233	12.65	12.0267	5.49667	4.05667	17.2667	18.9933	1.69645e-07	1	1	PF12298 Eukaryotic mitochondrial regulator protein	IPR021036 Ribosomal protein S35, mitochondrial
AT1G05360	5.48	6.15333	2.34667	2.23	2.02667	2.27	2.63333	2.55333	6.24333	8.25667	1.69702e-07	1	1
AT1G65150	2.33	6.55	1.96667	2.10667	1.19	1.13	6.21	2.42667	0.0233333	0.02	1.6994e-07	1	5.51976e-05	PF00917 MATH domain / PF00917 MATH domain / PF00917 MATH domain / PF00917 MATH domain	IPR002083 MATH / IPR008974 TRAF-like
AT5G03495	1.33333	4.03333	0	0.02	0.0566667	0	2.08	5.59333	0	0	1.70108e-07	0.0403068	0.0614703	PF14605 Nup53/35/40-type RNA recognition motif	IPR012677 Nucleotide-binding, alpha-beta plait
AT4G13160	7.28667	10.1167	1.14667	2.28333	0.07	0.43	6.40667	9.87333	0.306667	0.886667	1.72017e-07	1	1	PF04576 Zein-binding	IPR007656 Zein-binding domain
AT3G19515	8.97	13.8067	1.98667	2.49	3.78333	5.59	16.79	25.4233	10.19	14.39	1.73488e-07	0.755775	1	PF05918 Apoptosis inhibitory protein 5 (API5) / PF05918 Apoptosis inhibitory protein 5 (API5) / PF05918 Apoptosis inhibitory protein 5 (API5)	IPR008383 Apoptosis inhibitory 5 / IPR011989 Armadillo-like helical
AT3G46430	85.5067	91.8467	49.4	39.9167	47.51	45.7267	27.6967	23.2967	56.51	68.4867	1.74502e-07	1	1
AT4G00752	7.04667	9.62667	0.0733333	0.0733333	0	0	9.40667	14.39	8.15333	12.3933	1.81858e-07	1	1	PF02809 Ubiquitin interaction motif 5-22 / PF02809 Ubiquitin interaction motif 5-22 / PF00789 UBX domain / PF14555 UBA-like domain	IPR003903 Ubiquitin interacting motif / IPR001012 UBX / IPR009060 UBA-like
AT3G55040	60.91	65.4833	46.1933	38.3767	43.99	42.7167	46.1	52.78	9.22333	18.3533	1.82618e-07	1	1	PF13409 Glutathione S-transferase, N-terminal domain / PF13417 Glutathione S-transferase, N-terminal domain / PF13410 Glutathione S-transferase, C-terminal domain	IPR004045 Glutathione S-transferase, N-terminal / IPR010987 Glutathione S-transferase, C-terminal-like / IPR012336 Thioredoxin-like fold / IPR017933 Glutathione S-transferase/chloride channel, C-terminal
AT1G25098	170.42	206.637	1.97333	0.146667	0.0766667	0.0333333	0	0.146667	0	0.286667	1.85805e-07	1	1
AT5G09310	13.6467	15.5833	4.10333	4.91	10.5	12.2767	13.13	17.1733	15.4733	27.33	1.86758e-07	0.0575253	1	PF10251 Presenilin enhancer-2 subunit of gamma secretase	IPR019379 Gamma-secretase aspartyl protease complex, presenilin enhancer-2 subunit
AT5G28442	1.81	3.23667	0	0	0	0.103333	0	0	0	0	1.86855e-07	1	1
AT5G28060	228.353	144.063	44.2133	21.6833	43.83	23.9333	44.5667	27.6367	49.4967	53.05	1.86939e-07	1	1	PF01282 Ribosomal protein S24e	IPR001976 Ribosomal protein S24e / IPR012678 Ribosomal protein L23/L15e core domain / IPR018098 Ribosomal S24e conserved site / IPR012677 Nucleotide-binding, alpha-beta plait
AT4G12990	2.10667	3.23333	1.23333	4.3	0	0	0	0.0833333	2.64667	9.09	1.8945e-07	0.000794162	0.00541551
AT3G04181	0.323333	1.16333	1.71667	1.53	2.65667	3.35333	0	0	1.72333	5.13667	1.8965e-07	0.0704317	0.0349661
AT1G27030	8.39333	17.3533	28.0367	88.7833	40.9667	108.997	8.39	57.54	17.7333	41.98	1.93974e-07	7.75745e-09	0.0263573	PF07063 Protein of unknown function (DUF1338)	IPR009770 Domain of unknown function DUF1338
AT5G17900	11.0633	16.86	2.54667	3.93	3.62667	4.44333	3.23667	3.16	3.05667	4.38	1.98426e-07	1	1	PF06991 Micro-fibrillar-associated protein 1 C-terminus	IPR009730 Micro-fibrillar-associated protein 1, C-terminal
AT4G39180	2.93	7.84667	0.64	0.606667	0.463333	0.33	0.146667	0.503333	0.286667	0.15	2.00555e-07	1	0.0414155	PF00650 CRAL/TRIO domain / PF03765 CRAL/TRIO, N-terminus	IPR001251 CRAL-TRIO domain / IPR011074 CRAL/TRIO, N-terminal domain / IPR001071 Cellular retinaldehyde binding/alpha-tocopherol transport
AT4G04800	26.2133	29.9133	25.92	38.1367	27.9233	34.3967	10.2067	13.39	27.3767	61.4767	2.0242e-07	8.26466e-05	0.00691264	PF01641 SelR domain	IPR002579 Peptide methionine sulphoxide reductase MrsB / IPR011057 Mss4-like
AT4G02860	16.8433	21.18	3.32333	7.30667	3.32333	6.47667	6.18667	10.72	2.61	9.81667	2.06788e-07	0.00505427	1	PF02567 Phenazine biosynthesis-like protein	IPR003719 Phenazine biosynthesis PhzF protein
AT1G22590	23.0567	17.5767	0.726667	0.59	0.396667	0.163333	0.786667	0.503333	10.09	4.05667	2.07273e-07	1	1
AT1G68250	0.04	0.1	0.0533333	0.07	1.88	1.19667	0.03	0.0533333	0.0433333	0.0566667	2.14488e-07	1	1
AT5G38050	3.58333	3.67333	0.56	0.75	1.23667	1.35667	3.26	4.14667	0.54	1.59	2.29046e-07	1	1	PF09816 RNA polymerase II transcription elongation factor	IPR019194 Transcription elognation factor Eaf, N-terminal / IPR027093 EAF family
AT4G11521	9.21333	6.11667	0.33	0.05	7.54667	10.8667	0.0566667	0	0	0.0666667	2.30467e-07	1	1	PF01657 Salt stress response/antifungal / PF01657 Salt stress response/antifungal	IPR002902 Gnk2-homologous domain
AT4G13150	16.22	25.7233	3.85	6.07667	3.25667	3.43	17.96	26.3767	3.65	7.69333	2.39883e-07	1	1
AT1G58848	28.8967	34.5667	3.28	1.79	1.13333	1.56667	1.86667	1.66333	8.35	8.25333	2.42863e-07	1	1	PF00931 NB-ARC domain	IPR002182 NB-ARC / IPR000767 Disease resistance protein / IPR027417 P-loop containing nucleoside triphosphate hydrolase
AT2G28410	7.45667	8.84333	0.0466667	0.0633333	0	0	7.22333	13.6367	0.176667	0	2.43281e-07	1	1
AT1G58590	2.75	4.06	0	0	0.143333	0.27	0	0	1.42667	2.17667	2.44189e-07	1	1
AT5G66040	257.07	262.26	12.2433	11.53	176.557	220.62	218.913	350.06	193.03	255.223	2.44728e-07	1	1	PF00581 Rhodanese-like domain	IPR001763 Rhodanese-like domain
AT1G50310	0.183333	0.246667	0.176667	0.0933333	0.866667	1.07	0.21	0.0633333	0.106667	0.0533333	2.50389e-07	1	1	PF00083 Sugar (and other) transporter	IPR005828 General substrate transporter / IPR003663 Sugar/inositol transporter / IPR020846 Major facilitator superfamily domain / IPR016196 Major facilitator superfamily domain, general substrate transporter / IPR005829 Sugar transporter, conserved site
AT1G65290	102.533	93.7633	103.443	100.067	102.227	94.1567	110.833	93.4067	3.07	3.35333	2.50725e-07	1	1	PF00550 Phosphopantetheine attachment site 737-806	IPR009081 Acyl carrier protein-like / IPR003231 Acyl carrier protein (ACP) / IPR006162 Phosphopantetheine attachment site
AT1G25055	3.61667	4.82667	0.243333	0.0333333	2.29	3.58333	0.0166667	0	2.63	4.34667	2.66339e-07	1	1	PF00646 F-box domain / PF07734 F-box associated	IPR006527 F-box associated domain, type 1 / IPR017451 F-box associated interaction domain / IPR001810 F-box domain, cyclin-like
AT1G53490	2.71333	3.7	0.526667	0.37	0.0966667	0.283333	0.15	0.28	1.02667	1.58	2.75419e-07	1	1	PF13923 Zinc finger, C3HC4 type (RING finger) / PF14634 zinc-RING finger domain	IPR001841 Zinc finger, RING-type / IPR013083 Zinc finger, RING/FYVE/PHD-type
AT1G67360	19.98	109.78	28.3933	158.91	14.8133	114.597	17.5433	87.5067	28.6067	604.433	2.77256e-07	9.23279e-09	5.67513e-07	PF05755 Rubber elongation factor protein (REF)	IPR008802 Rubber elongation factor
AT1G29030	2.63333	2.54	2.73667	3.26333	3.45	4.35333	4.28	2.76	4.39333	9.7	2.80136e-07	0.448449	9.33241e-05	PF05918 Apoptosis inhibitory protein 5 (API5)	IPR008383 Apoptosis inhibitory 5 / IPR016024 Armadillo-type fold / IPR011989 Armadillo-like helical
AT2G17910	0	0	0	0	0	0	1.46	1.43333	0	0	2.83188e-07	1	1
AT1G58807	29.65	47.69	6.22333	5.01667	3.22667	3.71667	1.96	1.65667	8.42667	8.42	2.86209e-07	1	1	PF00931 NB-ARC domain	IPR002182 NB-ARC / IPR000767 Disease resistance protein / IPR027417 P-loop containing nucleoside triphosphate hydrolase
AT4G34881	111.663	159.517	1.38333	0.68	93.31	203.957	112.967	199.253	4.07	1.84333	2.89348e-07	0.252398	1
AT1G63360	13.2767	18.66	4.36667	3.04333	13.5233	14.4767	0.146667	0.0966667	5.69333	4.81	2.97515e-07	1	1	PF00931 NB-ARC domain	IPR002182 NB-ARC / IPR000767 Disease resistance protein / IPR027417 P-loop containing nucleoside triphosphate hydrolase
AT3G15590	8.35667	7.18333	2.94	3.32	3.78333	3.12333	3.76667	2.44	11.9133	15.4767	3.02317e-07	1	1	PF01535 PPR repeat 10-34 52-76 94-118 / PF01535 PPR repeat 10-34 52-76 94-118 / PF01535 PPR repeat 10-34 52-76 94-118 / PF01535 PPR repeat 10-34 52-76 94-118	IPR002885 Pentatricopeptide repeat
AT4G08280	39.99	34.9133	9.45333	7.54333	9.66	8.34	7.06333	5.66	14.03	14.8967	3.12817e-07	1	1	PF05768 Glutaredoxin-like domain (DUF836)	IPR008554 Glutaredoxin-like / IPR012336 Thioredoxin-like fold
AT1G23130	1096.73	2230.68	160.317	615.36	662.247	2015.52	1000.16	2906.37	51.5833	166.293	3.4152e-07	5.20177e-06	0.283272	PF00407 Pathogenesis-related protein Bet v I family	IPR000916 Bet v I domain / IPR024948 Major latex protein domain / IPR023393 START-like domain
AT2G32160	43.4867	67.65	13.3033	20.3233	16.5833	16.75	6.60667	5.93333	17.2033	32.8267	3.43382e-07	1	1	PF07942 N2227-like protein	IPR012901 N2227-like
AT4G00520	8.52333	11.4	1.27333	1.96	2.32667	2.39	1.22	2.1	1.26	1.60667	3.55962e-07	1	1	PF00027 Cyclic nucleotide-binding domain / PF13622 Thioesterase-like superfamily	IPR000595 Cyclic nucleotide-binding domain / IPR014710 RmlC-like jelly roll fold / IPR003703 Acyl-CoA thioesterase / IPR018490 Cyclic nucleotide-binding-like
AT3G25290	2.91667	10.1767	1.18	4.74	1.16333	2.18	0.29	0.96	1.32667	5.47	3.61565e-07	2.00365e-07	0.00326994	PF03188 Eukaryotic cytochrome b561 / PF04526 Protein of unknown function (DUF568)	IPR004877 Cytochrome b561, eukaryote / IPR017214 Uncharacterised conserved protein UCP037471 / IPR005018 DOMON domain / IPR006593 Cytochrome b561/ferric reductase transmembrane
AT1G11280	7.45667	8.44	10.39	8.59667	12.01	8.80333	10.4967	8.07667	0.183333	0.0633333	3.65083e-07	1	1	PF00954 S-locus glycoprotein family / PF01453 D-mannose binding lectin / PF07714 Protein tyrosine kinase / PF08276 PAN-like domain / PF08276 PAN-like domain	IPR013227 PAN-2 domain / IPR001245 Serine-threonine/tyrosine-protein kinase catalytic domain / IPR001480 Bulb-type lectin domain / IPR000858 S-locus glycoprotein / IPR013320 Concanavalin A-like lectin/glucanase, subgroup / IPR008271 Serine/threonine-protein kinase, active site / IPR011009 Protein kinase-like domain / IPR003609 Apple-like / IPR002290 Serine/threonine- / dual specificity protein ki…
AT1G27180	1.5	2.39667	0.17	0.196667	0.0833333	0.123333	0.106667	0.1	0.103333	0.143333	3.74094e-07	1	1	PF00931 NB-ARC domain / PF01582 TIR domain / PF01582 TIR domain	IPR002182 NB-ARC / IPR000157 Toll/interleukin-1 receptor homology (TIR) domain / IPR000767 Disease resistance protein / IPR027417 P-loop containing nucleoside triphosphate hydrolase
AT3G18320	2.98333	2.87667	0.0433333	0.07	0.123333	0.193333	0.14	0.273333	0.436667	0.386667	3.89052e-07	1	1	PF00646 F-box domain / PF07734 F-box associated / PF00646 F-box domain	IPR001810 F-box domain, cyclin-like / IPR006527 F-box associated domain, type 1 / IPR017451 F-box associated interaction domain
AT4G29550	0.13	0.113333	0.0933333	0.506667	0.03	0.31	0.02	0.0666667	0.856667	2.75	4.07281e-07	0.043304	0.0236244	PF04776 Protein of unknown function (DUF626)	IPR006462 Protein of unknown function DUF626, Arabidopsis thaliana
AT3G44430	15.43	15.8867	0.0866667	0	0	0	11.4933	7.47667	0	0.07	4.0838e-07	1	1
AT5G59660	0.98	2.8	0.05	0	0	0.03	3.00333	2.81333	0	0	4.18378e-07	1	1	PF00069 Protein kinase domain / PF12819 Carbohydrate-binding protein of the ER / PF13855 Leucine rich repeat	IPR000719 Protein kinase, catalytic domain / IPR024788 Malectin-like carbohydrate-binding domain / IPR008271 Serine/threonine-protein kinase, active site / IPR011009 Protein kinase-like domain / IPR017441 Protein kinase, ATP binding site
AT3G60980	6.24667	7.24667	0	0	0	0	8.27333	9.57333	0	0.04	4.22536e-07	1	1	PF01535 PPR repeat 10-34 52-76 94-118 / PF01535 PPR repeat 10-34 52-76 94-118 / PF13812 Pentatricopeptide repeat domain	IPR002885 Pentatricopeptide repeat / IPR011990 Tetratricopeptide-like helical
AT4G27080	14.8167	17.02	38.9833	57.9667	51.3233	56.5167	26.92	27.5833	36.06	56.1933	4.52355e-07	0.517467	1	PF00085 Thioredoxin / PF13850 Endoplasmic Reticulum-Golgi Intermediate Compartment (ERGIC) / PF07970 Protein of unknown function (DUF1692) / PF13850 Endoplasmic Reticulum-Golgi Intermediate Compartment (ERGIC)	IPR013766 Thioredoxin domain / IPR012936 Endoplasmic reticulum vesicle transporter, C-terminal / IPR012336 Thioredoxin-like fold
AT1G24380	0	0	0	0.04	0	0.0266667	0	0	0.09	2.67	4.61209e-07	0.0025048	1.60827e-06	PF14303 No apical meristem-associated C-terminal domain
AT4G01540	1.19667	3.45333	0.996667	8.60333	1.04	4.52333	1.15667	2.13	2.36	32.6	4.68326e-07	1.53811e-06	2.24016e-06	PF02365 No apical meristem (NAM) protein	IPR003441 No apical meristem (NAM) protein
AT5G27927	0	0	0	0.0366667	0.226667	0.11	7.32	13.8467	0	0.17	4.70682e-07	1	1
AT5G16350	0.83	0.233333	5.20333	4.98333	4.08667	8.41667	6.76667	5.33667	6.73	4.16667	4.798e-07	1	0.0122532	PF03007 Uncharacterised protein family (UPF0089) / PF06974 Protein of unknown function (DUF1298)	IPR004255 O-acyltransferase, WSD1, N-terminal / IPR009721 O-acyltransferase, WSD1, C-terminal
AT5G29000	8.10667	10.4033	10.2533	12.2433	9.52667	13.77	21.7433	24.44	7.14667	18.3167	4.82397e-07	0.00553668	1	PF00249 Myb-like DNA-binding domain / PF14379 MYB-CC type transfactor, LHEQLE motif	IPR001005 SANT/Myb domain / IPR025756 MYB-CC type transcription factor, LHEQLE-containing domain / IPR017930 Myb domain / IPR006447 Myb domain, plants / IPR009057 Homeodomain-like
AT5G59620	0	0.0266667	0.05	0.113333	0.0233333	0.0233333	2.47667	3.28	0	0.0766667	4.8253e-07	1	1
AT5G66005	8.2	6.71	2.04333	1.74	6.82333	6.53	9.09333	8.76	1.83667	1.99667	4.88947e-07	1	1	PF03266 Protein of unknown function, DUF265	IPR004948 Nucleoside-triphosphatase, THEP1 type
AT2G40290	34.7033	29.1767	43.2467	31.1333	63.81	53.2667	47	33.18	70.56	66.4267	4.90619e-07	0.477896	1	PF07541 Eukaryotic translation initiation factor 2 alpha subunit / PF00575 S1 RNA binding domain	IPR011488 Translation initiation factor 2, alpha subunit / IPR003029 Ribosomal protein S1, RNA-binding domain / IPR022967 RNA-binding domain, S1 / IPR024055 Translation initiation factor 2, alpha subunit, C-terminal / IPR024054 Translation initiation factor 2, alpha subunit, middle domain / IPR012340 Nucleic acid-binding, OB-fold
AT1G34060	3.28	2.63333	0.973333	3.73667	1.41333	2.66333	1.67	1.41	0.763333	54.57	5.00573e-07	0.000260787	2.30427e-07	PF04863 Alliinase EGF-like domain / PF04864 Allinase	IPR006947 EGF-like, alliinase / IPR006948 Allinase, C-terminal / IPR015421 Pyridoxal phosphate-dependent transferase, major region, subdomain 1 / IPR015422 Pyridoxal phosphate-dependent transferase, major region, subdomain 2 / IPR015424 Pyridoxal phosphate-dependent transferase
AT1G61300	16.0633	18.2367	2.92667	2.23	0.04	0.1	1.57	1.75	19.87	19.8033	5.02237e-07	1	1	PF00931 NB-ARC domain / PF13855 Leucine rich repeat	IPR002182 NB-ARC / IPR027417 P-loop containing nucleoside triphosphate hydrolase / IPR000767 Disease resistance protein
AT2G04230	7.46667	8.66333	6.56333	9.34	6.54	6.23667	16.9433	16.2933	4.90667	7.29333	5.1175e-07	1	1	PF00646 F-box domain / PF00646 F-box domain / PF07723 Leucine Rich Repeat / PF08387 FBD / PF08387 FBD	IPR006566 FBD / IPR001810 F-box domain, cyclin-like / IPR013101 Leucine-rich repeat 2
AT5G45550	34.9533	48.5667	28.7067	46.3733	35.1	43.3167	0.41	0.586667	29.9667	62.8267	5.14338e-07	0.0117028	1	PF03637 Mob1/phocein family	IPR005301 Mob1/phocein
AT1G58440	14.9033	15.32	6.58333	4.45667	10.6167	10.61	15.8433	14.23	4.64333	5.14333	5.17012e-07	1	1	PF01946 Thi4 family / PF08491 Squalene epoxidase / PF13450 NAD(P)-binding Rossmann-like domain	IPR013698 Squalene epoxidase / IPR003042 Aromatic-ring hydroxylase-like
AT4G09750	6.77667	24.38	9.38	37.8067	1.41	11.1567	1.12667	6.38333	20.1633	148.943	5.4194e-07	3.03781e-05	5.45683e-05	PF00106 short chain dehydrogenase	IPR002198 Short-chain dehydrogenase/reductase SDR / IPR016040 NAD(P)-binding domain / IPR002347 Glucose/ribitol dehydrogenase
AT5G56380	4.70333	6.58	3.52333	6.48333	3.88333	5.42333	2.60333	1.20667	0.07	0.0733333	5.42929e-07	1	1	PF08387 FBD / PF07723 Leucine Rich Repeat / PF00646 F-box domain	IPR006566 FBD / IPR013101 Leucine-rich repeat 2 / IPR001810 F-box domain, cyclin-like
AT4G08170	8.02	9.59	9.19	9.62	34.47	11.6767	7.88333	10.14	8.92333	9.14333	5.45066e-07	0.624401	9.39013e-06	PF05770 Inositol 1, 3, 4-trisphosphate 5/6-kinase	IPR008656 Inositol-tetrakisphosphate 1-kinase / IPR011761 ATP-grasp fold / IPR017427 Inositol-tetrakisphosphate 1-kinase, plant
AT3G03702	0.93	1.92333	0.106667	0.176667	0	0.0766667	0	0.0233333	1.24	1.89667	5.73122e-07	1	1
AT5G10330	18.3033	15.0833	38.63	29.3767	38.74	30.4233	21.8167	16.34	24.34	22.8467	5.75637e-07	0.120864	1	PF00155 Aminotransferase class I and II	IPR004839 Aminotransferase, class I/classII / IPR015424 Pyridoxal phosphate-dependent transferase / IPR005861 Histidinol-phosphate aminotransferase family / IPR015421 Pyridoxal phosphate-dependent transferase, major region, subdomain 1 / IPR015422 Pyridoxal phosphate-dependent transferase, major region, subdomain 2
AT4G39250	0.526667	1.01333	0.663333	1.23333	0	1.66667	0.65	1.30667	0.686667	16.6567	6.045e-07	5.34734e-05	1.00031e-06	PF00249 Myb-like DNA-binding domain	IPR001005 SANT/Myb domain / IPR009057 Homeodomain-like / IPR017884 SANT domain
AT1G67560	8.27333	13.1167	10.71	13.4433	2.94333	2.86667	8.96	9.50333	3.97333	4.07	6.10259e-07	1	1	PF00305 Lipoxygenase / PF01477 PLAT/LH2 domain / PF01477 PLAT/LH2 domain	IPR001024 Lipoxygenase, LH2 / IPR013819 Lipoxygenase, C-terminal / IPR020834 Lipoxygenase, conserved site / IPR020833 Lipoxygenase, iron binding site / IPR001246 Lipoxygenase, plant / IPR000907 Lipoxygenase / IPR008976 Lipase/lipooxygenase, PLAT/LH2 / IPR027433 Lipoxygenase, domain 3
AT5G27100	0.633333	1.07333	0.0166667	0	0	0	0.77	0.623333	0	0	6.31128e-07	1	1	PF01094 Receptor family ligand binding region / PF00060 Ligand-gated ion channel / PF00497 Bacterial extracellular solute-binding proteins, family 3 / PF01094 Receptor family ligand binding region	IPR001828 Extracellular ligand-binding receptor / IPR001320 Ionotropic glutamate receptor / IPR001638 Extracellular solute-binding protein, family 3 / IPR017103 Ionotropic glutamate receptor, plant / IPR028082 Periplasmic binding protein-like I
AT1G24510	42.7167	46.1	28.91	29.9133	34.23	33.5033	30.4467	32.7167	52.4033	89.21	6.32321e-07	1	0.241641	PF00118 TCP-1/cpn60 chaperonin family	IPR002423 Chaperonin Cpn60/TCP-1 / IPR027409 GroEL-like apical domain / IPR027413 GroEL-like equatorial domain / IPR027410 TCP-1-like chaperonin intermediate domain / IPR002194 Chaperonin TCP-1, conserved site / IPR017998 Chaperone tailless complex polypeptide 1 (TCP-1) / IPR012718 T-complex protein 1, epsilon subunit
AT1G31870	7.55	10.15	2.14	2.27	9.36667	10.31	8.97	8.68333	8.34667	13.88	6.69901e-07	1	1	PF09736 Pre-mRNA-splicing factor of RES complex	IPR018609 Bud13
AT5G24160	2.99	3.27333	23	48.2467	14.8833	27.6267	20.2	20.84	10.88	3.68333	6.81692e-07	1	0.0989346	PF01266 FAD dependent oxidoreductase / PF08491 Squalene epoxidase	IPR006076 FAD dependent oxidoreductase / IPR013698 Squalene epoxidase / IPR003042 Aromatic-ring hydroxylase-like
AT3G27200	10.1333	8.55	0.216667	0.153333	0.0466667	0.163333	2.39667	3.18	0.186667	0	6.99793e-07	1	1	PF02298 Plastocyanin-like domain 159-177	IPR003245 Plastocyanin-like / IPR008972 Cupredoxin
AT3G25470	44.2033	36.0367	26.38	19.6067	33.0233	22.25	41.02	29.79	30.42	26.8333	7.00995e-07	1.72715e-05	1	PF01728 FtsJ-like methyltransferase / PF01479 S4 domain	IPR002877 Ribosomal RNA methyltransferase FtsJ domain / IPR002942 RNA-binding S4 domain / IPR004538 Haemolysin A
AT4G29410	128.41	74.5633	134.31	86.6533	329.35	197.973	148.947	90.48	189.91	205.883	7.02287e-07	0.0144315	1	PF01778 Ribosomal L28e protein family	IPR002672 Ribosomal protein L28e
AT1G24793	3.96333	3.89333	0.23	0.396667	0.593333	0.916667	0.196667	0.163333	0.346667	1.39	7.16535e-07	1	1	PF03331 UDP-3-O-acyl N-acetylglycosamine deacetylase	IPR004463 UDP-3-O-acyl N-acetylglucosamine deacetylase / IPR020568 Ribosomal protein S5 domain 2-type fold / IPR015870 UDP-3-O-acyl N-acetylglucosamine deacetylase, N-terminal / IPR011334 UDP-3-O-acyl N-acetylglucosamine deacetylase, C-terminal
AT5G61330	14.2267	11.7733	15.3767	12.1667	15.0367	13.6467	7.25	4.64333	14.9267	21.94	7.46099e-07	1	0.214444	PF08164 TRAUB (NUC102) domain / PF13339 Apoptosis antagonizing transcription factor	IPR012617 Apoptosis-antagonizing transcription factor, C-terminal / IPR025160 AATF leucine zipper-containing domain
AT1G25150	2.77333	4.60667	0.113333	0.0333333	2.74667	3.07333	0	0	2.14333	4.81	7.63885e-07	1	1	PF07734 F-box associated / PF00646 F-box domain	IPR006527 F-box associated domain, type 1 / IPR017451 F-box associated interaction domain / IPR001810 F-box domain, cyclin-like
AT2G23410	0	0.04	0	0	0	0	0.59	0.693333	0.486667	3.89333	7.66505e-07	0.0297393	4.62323e-05	PF01255 Putative undecaprenyl diphosphate synthase	IPR001441 Decaprenyl diphosphate synthase-like / IPR018520 Di-trans-poly-cis-decaprenylcistransferase-like, conserved site
AT1G22500	3.88667	2.89667	6.55667	5.58	12.3033	5.9	2.87333	0.493333	0.883333	1.19	7.68088e-07	0.334125	1	PF13639 Ring finger domain / PF13639 Ring finger domain	IPR001841 Zinc finger, RING-type / IPR013083 Zinc finger, RING/FYVE/PHD-type
AT4G28220	12.68	17.76	11.0867	14.1667	14.0367	13.84	16.88	21.91	13.8833	48.8367	7.76535e-07	7.92305e-06	2.368e-06	PF00070 Pyridine nucleotide-disulphide oxidoreductase 144-177 / PF07992 Pyridine nucleotide-disulphide oxidoreductase	IPR001327 Pyridine nucleotide-disulphide oxidoreductase, NAD-binding domain / IPR023753 Pyridine nucleotide-disulphide oxidoreductase, FAD/NAD(P)-binding domain / IPR011992 EF-hand-like domain / IPR018247 EF-Hand 1, calcium-binding site / IPR002048 EF-hand domain / IPR013027 FAD-dependent pyridine nucleotide-disulphide oxidoreductase / IPR000103 Pyridine nucleotide-disulphide oxidoreductase, clas…
AT2G12040	0	0	7.35333	8.69	0	0.0733333	9.54333	13.0433	0	0	7.79489e-07	1	1
AT5G21060	20.45	22.5233	25.89	24.9867	22.4667	19.7833	5.44333	5.17667	7.75	5.59333	8.00455e-07	1	1	PF00742 Homoserine dehydrogenase	IPR001342 Homoserine dehydrogenase, catalytic / IPR016040 NAD(P)-binding domain / IPR019811 Homoserine dehydrogenase, conserved site
AT5G20620	31.9967	57.7033	37.66	80.52	44.2633	57.1567	55.3167	48.8467	50.0867	109.673	8.0964e-07	2.13164e-09	2.31986e-06	PF00240 Ubiquitin family / PF00240 Ubiquitin family / PF00240 Ubiquitin family / PF00240 Ubiquitin family / PF00240 Ubiquitin family	IPR000626 Ubiquitin / IPR019955 Ubiquitin supergroup / IPR019956 Ubiquitin subgroup / IPR019954 Ubiquitin conserved site
AT4G16840	5.03	5.03667	6.96333	6.43333	0.573333	0.523333	0	0	1.25333	3.00333	8.11767e-07	1	1
AT5G23200	5.44333	5.57667	1.87	1.49667	2.18	1.87333	6.30667	6.89667	5.82333	9.14667	8.41301e-07	1	1
AT4G15242	0.0533333	0.11	9.86333	8.21333	9.37667	8.04333	0.0233333	0.0533333	11.4433	13.74	8.45293e-07	1	1
AT1G62640	14.7567	11.3967	8.29	5.91333	3.46333	2.76	4.38667	2.98667	10.5267	6.57667	8.50803e-07	0.853645	1	PF08541 3-Oxoacyl-[acyl-carrier-protein (ACP)] synthase III C terminal / PF08545 3-Oxoacyl-[acyl-carrier-protein (ACP)] synthase III	IPR013751 3-Oxoacyl-[acyl-carrier-protein (ACP)] synthase III / IPR013747 3-Oxoacyl-[acyl-carrier-protein (ACP)] synthase III C-terminal / IPR004655 3-oxoacyl-[acyl-carrier-protein] synthase 3 / IPR016038 Thiolase-like, subgroup / IPR016039 Thiolase-like
AT1G24881	5.98333	6.41	0.0766667	0	2.67	2.49667	0.0133333	0	2.17667	4.86	8.55586e-07	1	1	PF07734 F-box associated / PF00646 F-box domain	IPR006527 F-box associated domain, type 1 / IPR017451 F-box associated interaction domain / IPR001810 F-box domain, cyclin-like
AT2G15230	8.52	13.5667	1.61667	3.73	10.8333	11.6033	1.66	2.48667	9.57333	19.8667	9.14349e-07	0.145563	1	PF00561 alpha/beta hydrolase fold / PF04083 ab-hydrolase associated lipase region	IPR000073 Alpha/beta hydrolase fold-1 / IPR006693 Partial AB-hydrolase lipase domain
AT4G02460	1.47333	1.84	2.94	4.05667	3.69667	4.07667	2.07	1.77667	4.29667	5.48667	9.20763e-07	1	1	PF08676 MutL C terminal dimerisation domain / PF01119 DNA mismatch repair protein, C-terminal domain / PF13589 Histidine kinase-, DNA gyrase B-, and HSP90-like ATPase	IPR014790 MutL, C-terminal, dimerisation / IPR013507 DNA mismatch repair protein, C-terminal / IPR014762 DNA mismatch repair, conserved site / IPR014763 DNA mismatch repair protein, N-terminal / IPR015434 DNA mismatch repair protein Pms1/Mlh2 / IPR002099 DNA mismatch repair protein / IPR003594 Histidine kinase-like ATPase, ATP-binding domain / IPR014721 Ribosomal protein S5 domain 2-type fold, su…
AT1G09590	159.51	83.7267	147.99	87.46	10.6633	6.15	150.35	83.1533	9.54667	16.19	9.43889e-07	0.133648	1	PF01157 Ribosomal protein L21e	IPR001147 Ribosomal protein L21e / IPR018259 Ribosomal protein L21e, conserved site / IPR008991 Translation protein SH3-like domain
AT3G18165	24.5933	24.0733	24.1933	23.79	21.3167	22.6733	26.33	23.5667	9.21333	14.2333	9.45671e-07	1	1	PF05700 Breast carcinoma amplified sequence 2 (BCAS2)	IPR008409 Pre-mRNA-splicing factor SPF27
AT1G60620	3.77667	4.55	1.64333	2.29	1.72667	2.24667	2.33667	1.73333	5.35333	9.68333	9.53041e-07	1	1	PF01000 RNA polymerase Rpb3/RpoA insert domain / PF01193 RNA polymerase Rpb3/Rpb11 dimerisation domain / PF01193 RNA polymerase Rpb3/Rpb11 dimerisation domain	IPR011261 DNA-directed RNA polymerase, dimerisation / IPR011262 DNA-directed RNA polymerase, insert domain / IPR001514 DNA-directed RNA polymerase, 30-40kDa subunit, conserved site / IPR009025 DNA-directed RNA polymerase, RBP11-like / IPR011263 DNA-directed RNA polymerase, RpoA/D/Rpb3-type
AT5G17890	5.28333	6.90667	0.0433333	0	0	0.00333333	0.01	0	0	0.00666667	9.74143e-07	1	1	PF00412 LIM domain / PF07725 Leucine Rich Repeat / PF00931 NB-ARC domain / PF12315 Protein of unknown function (DUF3633)	IPR001781 Zinc finger, LIM-type / IPR011713 Leucine-rich repeat 3 / IPR002182 NB-ARC / IPR022087 Protein of unknown function DUF3633 / IPR000767 Disease resistance protein / IPR027417 P-loop containing nucleoside triphosphate hydrolase
AT1G77770	8.35333	14.3033	1.39333	2.57667	9.92	13.54	13.43	11.0767	10.73	17.5267	9.75619e-07	0.309936	1	PF07800 Protein of unknown function (DUF1644) / PF07800 Protein of unknown function (DUF1644)	IPR012866 Protein of unknown function DUF1644
AT3G44120	0.45	0.45	2.59	3.17667	2.01667	1.69333	0.596667	0.403333	5.27333	3.99667	9.92175e-07	1	1	PF00646 F-box domain / PF07734 F-box associated / PF00646 F-box domain	IPR001810 F-box domain, cyclin-like / IPR006527 F-box associated domain, type 1 / IPR017451 F-box associated interaction domain / IPR011043 Galactose oxidase/kelch, beta-propeller
AT4G01920	0.966667	2.07667	0	0	0	0	0	0	0	0	9.97947e-07	1	1	PF03107 C1 domain / PF03107 C1 domain / PF03107 C1 domain / PF07649 C1-like domain / PF07649 C1-like domain / PF07649 C1-like domain	IPR004146 DC1 / IPR011424 C1-like
AT4G31130	19.18	20.27	19.7633	24.4233	23.6767	29.59	21.54	18.8367	20.8833	42.8533	1.00591e-06	2.10717e-05	4.57976e-06	PF06749 Protein of unknown function (DUF1218)	IPR009606 Protein of unknown function DUF1218
AT4G31650	2.32	5.99	2.71	10.1667	4.45333	8.48	0.21	0.433333	0.256667	0.976667	1.00642e-06	0.000158818	0.187291	PF02362 B3 DNA binding domain / PF02362 B3 DNA binding domain / PF02362 B3 DNA binding domain / PF02362 B3 DNA binding domain / PF02362 B3 DNA binding domain / PF02362 B3 DNA binding domain / PF02362 B3 DNA binding domain	IPR003340 B3 DNA binding domain / IPR015300 DNA-binding pseudobarrel domain
AT5G61950	0.703333	0.746667	0.95	0.656667	3.31	3.38	1.29667	0.653333	0.99	0.84	1.02186e-06	1	1	PF00443 Ubiquitin carboxyl-terminal hydrolase / PF00443 Ubiquitin carboxyl-terminal hydrolase / PF04780 Protein of unknown function (DUF629) / PF04781 Protein of unknown function (DUF627)	IPR006865 Domain of unknown function DUF629 / IPR001394 Peptidase C19, ubiquitin carboxyl-terminal hydrolase 2 / IPR006866 Domain of unknown function DUF627, N-terminal
AT5G34790	0.866667	0.753333	0.143333	0	0	0	2.72667	3.54333	0.0166667	0	1.0231e-06	1	1
AT5G18880	0	0	0	0	0	0	0	0	1.11333	1.39333	1.02588e-06	1	1	PF13966 zinc-binding in reverse transcriptase	IPR026960 Reverse transcriptase zinc-binding domain
AT5G45390	163.157	156.553	179.587	137.513	187.073	144.217	119.607	95.7967	224.007	147.777	1.07786e-06	4.33737e-06	0.587469	PF00574 Clp protease	IPR001907 ClpP / IPR023562 Clp protease proteolytic subunit /Translocation-enhancing protein TepA / IPR018215 ClpP, active site
AT1G24490	13.3233	16.43	4.55333	5.33333	5.43667	7.03333	6.11667	4.94	19.6967	23.63	1.07947e-06	1	1	PF02096 60Kd inner membrane protein	IPR001708 Membrane insertase OXA1/ALB3/YidC / IPR028055 Membrane insertase YidC/Oxa1, C-terminal
AT3G46530	14.2367	21.91	3.82667	5.17333	6.68667	9.25333	3.41	3.58	4.07	5.19667	1.10749e-06	1	1	PF00931 NB-ARC domain	IPR002182 NB-ARC / IPR000767 Disease resistance protein / IPR027417 P-loop containing nucleoside triphosphate hydrolase
AT5G38980	296.047	271.957	4.03667	0.573333	0.253333	0.67	149.51	150.033	289.5	452.94	1.1262e-06	1	1
AT3G29330	4.6	5.34	0.943333	1.72	6.74	9.47	0.556667	1.03	1	2.31333	1.1488e-06	1	1
AT1G31910	52.4	61.3167	32.1933	31.6233	44.4067	42.7867	8.99333	8.64333	39.49	53.9633	1.15744e-06	1	1	PF00288 GHMP kinases N terminal domain / PF08544 GHMP kinases C terminal	IPR006204 GHMP kinase N-terminal domain / IPR013750 GHMP kinase, C-terminal domain / IPR005916 Phosphomevalonate kinase, eukaryotic / IPR014721 Ribosomal protein S5 domain 2-type fold, subgroup / IPR016005 Phosphomevalonate kinase, ERG8 / IPR020568 Ribosomal protein S5 domain 2-type fold
AT2G24755	6.45333	7.6	0.0466667	0.02	0.0166667	0.136667	0.0133333	0.04	0	0.08	1.16019e-06	1	1
AT1G30160	1.00667	2.27333	0.0333333	0	0.683333	1.30333	0.296667	1.06333	0.85	3.19667	1.16787e-06	1.2021e-05	0.0233546	PF03478 Protein of unknown function (DUF295)	IPR005174 Protein of unknown function DUF295
AT5G02870	156.18	83.3733	52.02	29.1067	58.1233	34.17	55.78	26.9267	94.68	101.48	1.19671e-06	0.03297	1	PF00573 Ribosomal protein L4/L1 family / PF00573 Ribosomal protein L4/L1 family / PF14374 60S ribosomal protein L4 C-terminal domain	IPR002136 Ribosomal protein L4/L1e / IPR025755 60S ribosomal protein L4, C-terminal domain / IPR013000 Ribosomal protein L4/L1e, eukaryotic/archaeal, conserved site / IPR023574 Ribosomal protein L4 domain
AT1G23890	2.72	3.78	1.50667	1.79	1.36	1.22	4.95667	4.96333	4.03333	10.43	1.21431e-06	0.541437	0.024234	PF01436 NHL repeat 403-430 459-486 515-542 573-600 629-656	IPR001258 NHL repeat / IPR013017 NHL repeat, subgroup / IPR011042 Six-bladed beta-propeller, TolB-like
AT1G72880	21.46	18.73	9.24667	8.10667	17.6733	15.8367	17.4167	14.03	6.83333	4.12333	1.22287e-06	1	1	PF01975 Survival protein SurE	IPR002828 Survival protein SurE-like phosphatase/nucleotidase
AT1G80555	0.23	0.163333	0.51	0.5	0.78	0.55	2.05333	4.31667	0.0933333	0.973333	1.22893e-06	1	1	PF00180 Isocitrate/isopropylmalate dehydrogenase	IPR024084 Isopropylmalate dehydrogenase-like domain / IPR001804 Isocitrate and isopropylmalate dehydrogenases family
AT2G20390	13.7067	8.40333	1.52333	1.67667	1.2	1.08333	15.3667	14.2767	14.5867	24.4567	1.24474e-06	1	1	PF08695 Cytochrome oxidase complex assembly protein 1	IPR014807 Cytochrome oxidase assembly protein 1
AT4G10810	30.3233	24.8167	8.21	7.19333	7.40333	7.32333	20.46	23.8733	5.61333	9.87333	1.26969e-06	1	1
AT4G14910	28.83	25.78	18.9733	13.9933	15.9533	15.6267	17.4367	16.17	20.79	18.5033	1.32502e-06	1	1	PF00475 Imidazoleglycerol-phosphate dehydratase	IPR000807 Imidazoleglycerol-phosphate dehydratase / IPR020568 Ribosomal protein S5 domain 2-type fold / IPR020565 Imidazoleglycerol-phosphate dehydratase, conserved site
AT4G03910	0	0	0	0.02	0.0166667	0.0166667	0.0133333	0	0.956667	0.463333	1.33111e-06	1	1
AT5G24735	59.3467	83.91	10.8233	20.6967	0.0633333	0.0866667	24.7867	45.69	5.46667	19.7	1.36258e-06	1	1
AT5G43430	13.16	20.1267	12.2533	27.6467	5.66	7.50667	15.37	34.4133	11.1933	27.9133	1.37867e-06	3.16224e-08	0.0552417	PF01012 Electron transfer flavoprotein domain	IPR014730 Electron transfer flavoprotein, alpha/beta-subunit, N-terminal / IPR014729 Rossmann-like alpha/beta/alpha sandwich fold / IPR012255 Electron transfer flavoprotein, beta subunit / IPR000049 Electron transfer flavoprotein, beta-subunit, conserved site
AT1G67865	1161.61	686.433	90.1433	95.4867	36.9233	23.3967	15.5467	21.8633	21.14	34.6367	1.38731e-06	1	1
AT2G20360	56.1433	61.97	42.2867	43.5133	39.4167	40.4533	68.89	67.9967	69.8133	74.0767	1.41363e-06	1	1	PF13460 NADH(P)-binding	IPR016040 NAD(P)-binding domain
AT3G45770	28.1867	39.27	5.53	9.00333	11.85	14.0833	33.4167	46.8067	5.02667	11.1833	1.42171e-06	1	1	PF00107 Zinc-binding dehydrogenase / PF08240 Alcohol dehydrogenase GroES-like domain / PF08240 Alcohol dehydrogenase GroES-like domain	IPR013154 Alcohol dehydrogenase GroES-like / IPR013149 Alcohol dehydrogenase, C-terminal / IPR016040 NAD(P)-binding domain / IPR011032 GroES-like / IPR002085 Alcohol dehydrogenase superfamily, zinc-type
AT3G26470	0.86	1.20333	2.48667	5.79333	0.306667	0.486667	1.78333	2.65667	2.33333	9.62	1.43907e-06	0.00032692	0.00238377	PF05659 Arabidopsis broad-spectrum mildew resistance protein RPW8	IPR008808 Powdery mildew resistance protein, RPW8 domain
AT2G17640	7.82333	8.98333	7.02	6.73	4.56333	5.38	7.37667	8.73667	10.5567	15.34	1.45736e-06	1	1	PF06426 Serine acetyltransferase, N-terminal / PF00132 Bacterial transferase hexapeptide (three repeats) 64-81 98-115 116-133 150-167 175-192 / PF00132 Bacterial transferase hexapeptide (three repeats) 64-81 98-115 116-133 150-167 175-192	IPR010493 Serine acetyltransferase, N-terminal / IPR001451 Bacterial transferase hexapeptide repeat / IPR005881 Serine O-acetyltransferase / IPR011004 Trimeric LpxA-like / IPR018357 Hexapeptide transferase, conserved site
AT1G63110	11.8767	12.7533	6.05333	6.79667	5.42333	4.57667	4.1	3.75	5.49667	6	1.45866e-06	1	1	PF06728 GPI transamidase subunit PIG-U	IPR009600 GPI transamidase subunit PIG-U
AT1G14930	0.09	0.06	3.74667	0.573333	1.3	0	1.00667	0.47	0.186667	0	1.50283e-06	2.16111e-05	0.000211976	PF00407 Pathogenesis-related protein Bet v I family	IPR000916 Bet v I domain / IPR024948 Major latex protein domain / IPR023393 START-like domain
AT2G20910	0	0.0133333	0.846667	1.12667	0.56	1.66667	0.0233333	0	0.103333	0.146667	1.51816e-06	1	1
AT2G25450	151.523	126.237	477.95	171.903	511.02	313.73	253.647	143.523	539.423	42.13	1.51854e-06	1.13013e-09	2.54458e-05	PF03171 2OG-Fe(II) oxygenase superfamily / PF14226 non-haem dioxygenase in morphine synthesis N-terminal	IPR005123 Oxoglutarate/iron-dependent dioxygenase / IPR027443 Isopenicillin N synthase-like / IPR026992 Non-haem dioxygenase N-terminal domain
AT2G07750	0	0.0133333	0	0	0.0133333	0	1.80667	1.35667	3.57333	6.56	1.52197e-06	1	1	PF00271 Helicase conserved C-terminal domain / PF00270 DEAD/DEAH box helicase	IPR001650 Helicase, C-terminal / IPR011545 DNA/RNA helicase, DEAD/DEAH box type, N-terminal / IPR027417 P-loop containing nucleoside triphosphate hydrolase / IPR014001 Helicase, superfamily 1/2, ATP-binding domain / IPR014014 RNA helicase, DEAD-box type, Q motif
AT1G48700	0	0	0	0	0.413333	0.0433333	0.486667	0.06	1.73667	2.03333	1.52821e-06	1	1		IPR006620 Prolyl 4-hydroxylase, alpha subunit
AT5G38990	27.9933	36.5767	3.62667	2.99	2.76333	3.01	40.3967	25.0133	52.2333	47.38	1.53454e-06	1	1	PF07714 Protein tyrosine kinase / PF12819 Carbohydrate-binding protein of the ER	IPR001245 Serine-threonine/tyrosine-protein kinase catalytic domain / IPR024788 Malectin-like carbohydrate-binding domain / IPR017441 Protein kinase, ATP binding site / IPR008271 Serine/threonine-protein kinase, active site / IPR000719 Protein kinase, catalytic domain / IPR002290 Serine/threonine- / dual specificity protein kinase, catalytic domain / IPR020635 Tyrosine-protein kinase, catalytic d…
AT3G45440	0.0633333	0.273333	0.706667	1.46667	1.16667	1.66333	2.17	3.68	0.53	1.3	1.54038e-06	0.0639902	1	PF00069 Protein kinase domain / PF00069 Protein kinase domain / PF00139 Legume lectin domain	IPR001220 Legume lectin domain / IPR000719 Protein kinase, catalytic domain / IPR011009 Protein kinase-like domain / IPR008985 Concanavalin A-like lectin/glucanases superfamily / IPR002290 Serine/threonine- / dual specificity protein kinase, catalytic domain / IPR020635 Tyrosine-protein kinase, catalytic domain / IPR013320 Concanavalin A-like lectin/glucanase, subgroup / IPR017441 Protein kinase,…
AT1G58270	10.3433	31.8267	0.0566667	0.04	0.0233333	0	0	0.02	0	0.09	1.54664e-06	1	0.126084	PF00917 MATH domain / PF00917 MATH domain / PF00917 MATH domain / PF00917 MATH domain	IPR002083 MATH / IPR008974 TRAF-like
AT5G45500	20.87	31.8733	1.75667	2.71333	2.19	2.45333	0	0.03	2.23667	4.08667	1.59645e-06	1	1
AT5G41960	15.6467	24.3067	16.6967	40.35	6.42667	10.8833	6.04	8.81667	7.93	17.5933	1.62691e-06	0.000115299	0.443031
AT5G50550	3.95	5.07333	0.683333	1.5	1.21	1.15667	0.983333	1.32333	0.856667	2.17667	1.6399e-06	1	1	PF00400 WD domain, G-beta repeat 893-931 938-975 1109-1147 1194-1232 1236-1273 1277-1315 1319-1357 1361-1399 / PF00400 WD domain, G-beta repeat 893-931 938-975 1109-1147 1194-1232 1236-1273 1277-1315 1319-1357 1361-1399 / PF00400 WD domain, G-beta repeat 893-931 938-975 1109-1147 1194-1232 1236-1273 1277-1315 1319-1357 1361-1399	IPR001680 WD40 repeat / IPR017986 WD40-repeat-containing domain / IPR015943 WD40/YVTN repeat-like-containing domain
AT1G63370	0.333333	0.93	0.12	0.26	0.97	1.24	0.126667	0.236667	1.55333	4.23	1.64844e-06	0.217818	0.274464	PF00743 Flavin-binding monooxygenase-like / PF00743 Flavin-binding monooxygenase-like	IPR020946 Flavin monooxygenase-like / IPR000960 Flavin monooxygenase FMO
AT3G44660	0	0	2.61	4.35667	6.06667	4.72	0.243333	0.253333	0.9	2.26667	1.66207e-06	1	1		IPR023801 Histone deacetylase domain / IPR000286 Histone deacetylase superfamily
AT4G21210	136.573	129.283	137.767	110.263	159.337	115.43	37.2033	24.63	143.117	122.85	1.66925e-06	1	1	PF03618 Domain of unknown function (DUF299)	IPR005177 Bifunctional kinase-pyrophosphorylase / IPR026565 Putative pyruvate, phosphate dikinase regulatory protein / IPR017409 Pyruvate Pi dikinase regulator, chloroplast
AT1G30390	0.273333	0	0	0	0	0	3.46667	1.2	0	0	1.67971e-06	1	0.313413
AT5G45600	9.72667	11.8133	10.5067	11.7433	11.8933	10.8833	3.40667	2.40333	11.3833	19.48	1.71794e-06	1	1	PF03366 YEATS family	IPR005033 YEATS
AT3G16390	0	0	1.04667	1.75667	2.95333	2.33333	1.21667	1.26333	0.04	0	1.73331e-06	1	1	PF01419 Jacalin-like lectin domain / PF13415 Galactose oxidase, central domain / PF01344 Kelch motif 52-94 96-142 144-186 188-234 / PF01344 Kelch motif 52-94 96-142 144-186 188-234 / PF01344 Kelch motif 52-94 96-142 144-186 188-234	IPR001229 Mannose-binding lectin / IPR006652 Kelch repeat type 1 / IPR015915 Kelch-type beta propeller / IPR017388 Myrosinase-binding-related, jacalin-like lectin
AT5G40580	23.9167	33.1833	25.53	34.89	30.5133	34.0667	3.41667	5.41	29.8033	48.4467	1.73883e-06	0.37796	1	PF00227 Proteasome A-type and B-type	IPR001353 Proteasome, subunit alpha/beta / IPR000243 Peptidase T1A, proteasome beta-subunit / IPR023333 Proteasome B-type subunit / IPR016050 Proteasome, beta-type subunit, conserved site
AT1G65200	0.02	0.0266667	0.0133333	0	1.09	0.836667	1.14333	1.12	0.29	0.556667	1.78131e-06	1	1	PF04780 Protein of unknown function (DUF629) / PF00443 Ubiquitin carboxyl-terminal hydrolase / PF04781 Protein of unknown function (DUF627) / PF00443 Ubiquitin carboxyl-terminal hydrolase	IPR006865 Domain of unknown function DUF629 / IPR001394 Peptidase C19, ubiquitin carboxyl-terminal hydrolase 2 / IPR006866 Domain of unknown function DUF627, N-terminal / IPR007087 Zinc finger, C2H2 / IPR015880 Zinc finger, C2H2-like
AT1G24350	13.65	13.6767	12.3933	14.0833	5.44333	6.69667	7.79333	6.99333	12.7367	18.9333	1.784e-06	1	1	PF02681 Divergent PAP2 family	IPR003832 Acid phosphatase/vanadium-dependent haloperoxidase-related
AT4G11710	0	0	0.0266667	0	0.0266667	0	1.08667	0.413333	0	0.0866667	1.79542e-06	1	0.451226
AT1G65380	2.69667	4.65	1.06333	1.33	0.81	1.07	2.08	1.44667	1.18	1.65333	1.82289e-06	1	1	PF00560 Leucine Rich Repeat 17-38 40-61 / PF00560 Leucine Rich Repeat 17-38 40-61 / PF00560 Leucine Rich Repeat 17-38 40-61 / PF00560 Leucine Rich Repeat 17-38 40-61 / PF13855 Leucine rich repeat / PF13855 Leucine rich repeat	IPR001611 Leucine-rich repeat / IPR003591 Leucine-rich repeat, typical subtype
AT1G25210	2.90667	3.11333	0.14	0.203333	0.666667	1.09	0.14	0.186667	0.533333	1.53	1.84829e-06	1	1	PF03331 UDP-3-O-acyl N-acetylglycosamine deacetylase	IPR004463 UDP-3-O-acyl N-acetylglucosamine deacetylase / IPR020568 Ribosomal protein S5 domain 2-type fold / IPR015870 UDP-3-O-acyl N-acetylglucosamine deacetylase, N-terminal / IPR011334 UDP-3-O-acyl N-acetylglucosamine deacetylase, C-terminal
AT3G29670	8.84	10.4333	1.07333	2.08	0	0.0166667	2.70333	1.92333	0.526667	1.45333	1.87174e-06	1	1	PF02458 Transferase family	IPR003480 Transferase / IPR023213 Chloramphenicol acetyltransferase-like domain
AT4G35140	4.95	8.43333	2.60667	4.72667	3.05667	4.41667	7.21667	9.30667	4.03333	6.11	1.90991e-06	0.000125558	1	PF00400 WD domain, G-beta repeat 893-931 938-975 1109-1147 1194-1232 1236-1273 1277-1315 1319-1357 1361-1399 / PF00400 WD domain, G-beta repeat 893-931 938-975 1109-1147 1194-1232 1236-1273 1277-1315 1319-1357 1361-1399	IPR001680 WD40 repeat / IPR015943 WD40/YVTN repeat-like-containing domain / IPR017986 WD40-repeat-containing domain
AT4G12000	11.2867	11.7933	1.7	2.17	3.12	2.96333	1.45	1.82667	14.7767	16.5167	1.91389e-06	1	1	PF09335 SNARE associated Golgi protein	IPR015414 SNARE associated Golgi protein
AT1G74230	42.65	48.51	65.6967	86.2933	73.8233	85.0533	76.1167	70.4433	74.0667	127.803	1.94572e-06	0.0074994	0.0278162	PF00076 RNA recognition motif. (a.k.a. RRM, RBD, or RNP domain)	IPR000504 RNA recognition motif domain / IPR012677 Nucleotide-binding, alpha-beta plait
AT4G22390	0.276667	0.516667	0.846667	1.87333	0	0.0266667	0.0366667	0.0466667	1.72	4.03	1.95184e-06	1	1		IPR017451 F-box associated interaction domain
AT5G41950	16.62	24.9967	19.5933	28.4767	8.55667	9.55667	22.0767	27.4	5.35333	11.28	1.95656e-06	0.0883112	1	PF06552 Plant specific mitochondrial import receptor subunit TOM20	IPR010547 Plant specific mitochondrial import receptor subunit TOM20 / IPR011990 Tetratricopeptide-like helical
AT1G12220	4.17667	7.77667	0.03	0	0	0	0	0	0	0	1.97958e-06	1	1	PF13855 Leucine rich repeat / PF00931 NB-ARC domain	IPR002182 NB-ARC / IPR000767 Disease resistance protein / IPR027417 P-loop containing nucleoside triphosphate hydrolase
AT1G33102	3.3	3.95	0	0	0	0	0.236667	0.433333	3.22333	16.6767	1.99638e-06	0.291181	0.00130277
AT3G47250	61.1433	82.7567	36.4933	58.2867	75.12	113.287	0.31	0.11	68.0833	69.3433	2.03946e-06	1	1	PF03140 Plant protein of unknown function	IPR004158 Protein of unknown function DUF247, plant
AT5G35530	103.383	75.19	43.6967	32.9367	52.33	36.37	114.807	80.6533	50.83	65.82	2.07991e-06	1	1	PF00189 Ribosomal protein S3, C-terminal domain / PF07650 KH domain	IPR001351 Ribosomal protein S3, C-terminal / IPR004044 K Homology domain, type 2 / IPR015946 K homology domain-like, alpha/beta / IPR009019 K homology domain, prokaryotic type / IPR005703 Ribosomal protein S3, eukaryotic/archaeal
AT3G50020	0	0	0	0	0	0	3.58667	5.92	0	0	2.11564e-06	1	1	PF00280 Potato inhibitor I family	IPR000864 Proteinase inhibitor I13, potato inhibitor I
AT2G21860	30.44	22.2933	3.04	2.17333	1.58	2.35333	0.533333	0.52	1.12333	0.693333	2.13405e-06	1	1		IPR016017 GDNF/GAS1
AT3G12200	12.09	17.72	9.46333	13.2733	18.9867	21.7867	16.18	18.0633	18.4133	32.51	2.14711e-06	0.00042321	0.737678	PF00069 Protein kinase domain	IPR000719 Protein kinase, catalytic domain / IPR011009 Protein kinase-like domain / IPR020635 Tyrosine-protein kinase, catalytic domain / IPR002290 Serine/threonine- / dual specificity protein kinase, catalytic domain / IPR008266 Tyrosine-protein kinase, active site
AT1G47970	30.2033	69.7233	24.8333	34.35	27.98	33.54	14.82	14.17	44.04	61.4733	2.17648e-06	0.00473964	0.286106
AT4G35230	31.9733	29.6167	12.7133	14.4533	14.4833	14.3533	51.93	44.8933	16.02	16.76	2.18648e-06	1	1	PF07714 Protein tyrosine kinase	IPR001245 Serine-threonine/tyrosine-protein kinase catalytic domain / IPR002290 Serine/threonine- / dual specificity protein kinase, catalytic domain / IPR020635 Tyrosine-protein kinase, catalytic domain / IPR011990 Tetratricopeptide-like helical / IPR011009 Protein kinase-like domain / IPR000719 Protein kinase, catalytic domain
AT1G55890	9.56	9.14333	3.70333	3.19667	3.98667	3.73	4.10333	2.85667	6.57333	9.20333	2.23674e-06	1	1	PF01535 PPR repeat 10-34 52-76 94-118 / PF01535 PPR repeat 10-34 52-76 94-118 / PF13041 PPR repeat family / PF13041 PPR repeat family	IPR002885 Pentatricopeptide repeat / IPR011990 Tetratricopeptide-like helical
AT5G60360	284.907	552.81	108.33	248.417	114.383	256.89	126.85	232.303	126.147	275.293	2.24722e-06	6.11409e-07	1	PF00112 Papain family cysteine protease / PF08246 Cathepsin propeptide inhibitor domain (I29)	IPR013201 Proteinase inhibitor I29, cathepsin propeptide / IPR000668 Peptidase C1A, papain C-terminal / IPR013128 Peptidase C1A, papain / IPR000169 Cysteine peptidase, cysteine active site / IPR025660 Cysteine peptidase, histidine active site / IPR025661 Cysteine peptidase, asparagine active site
AT2G14090	1.35	1.36667	0	0	0	0	0	0.02	1.96	1.54667	2.27082e-06	1	1
AT5G56810	0.516667	0.456667	2.29333	1.85333	3.08	2.32333	0.67	0.656667	0.47	0.48	2.28555e-06	1	1	PF08387 FBD / PF00646 F-box domain / PF07723 Leucine Rich Repeat / PF08387 FBD	IPR006566 FBD / IPR001810 F-box domain, cyclin-like / IPR013101 Leucine-rich repeat 2
AT1G72140	0	0	0	0.0133333	0.393333	0.81	0	0	0.166667	0.206667	2.30012e-06	1	1	PF00854 POT family	IPR000109 Proton-dependent oligopeptide transporter family / IPR016196 Major facilitator superfamily domain, general substrate transporter
AT1G52260	3.1	4.56667	0.48	0.78	1.71	1.57	0.453333	0.266667	5.52667	7.34667	2.30496e-06	1	1	PF00085 Thioredoxin / PF00085 Thioredoxin / PF13848 Thioredoxin-like domain	IPR013766 Thioredoxin domain / IPR012336 Thioredoxin-like fold
AT2G43000	1.88333	2.77	2.34667	5.24333	3.05333	2.88667	3.09333	1.65667	1.78	22.4967	2.33728e-06	0.000236396	4.52809e-07	PF02365 No apical meristem (NAM) protein	IPR003441 No apical meristem (NAM) protein
AT1G08740	0.01	0	0	0	0.5	0.873333	0	0.0133333	0.0133333	0	2.37638e-06	1	1
AT4G27370	1.09667	0.616667	0.113333	0.0433333	0.0766667	0.05	2.51667	1.79333	2.50333	0.58	2.43163e-06	0.167451	1	PF00612 IQ calmodulin-binding motif / PF00612 IQ calmodulin-binding motif / PF00612 IQ calmodulin-binding motif / PF00063 Myosin head (motor domain)	IPR000048 IQ motif, EF-hand binding site / IPR001609 Myosin head, motor domain / IPR027417 P-loop containing nucleoside triphosphate hydrolase
AT4G38980	7.96333	6.59667	6.94	10.07	7.36	9.79	0.343333	0.5	11.9567	17.0933	2.45841e-06	1	1
AT5G47330	0.363333	0.803333	1.56	2.07667	9.06333	2.75333	0.886667	1.5	0.5	0.923333	2.49628e-06	1	0.00173706	PF02089 Palmitoyl protein thioesterase	IPR002472 Palmitoyl protein thioesterase
AT4G19060	6.46333	9.79333	2.13	2.78667	6.15667	9.71667	7.50333	9.24667	2.36667	4.36	2.56094e-06	0.0427297	1	PF00931 NB-ARC domain	IPR002182 NB-ARC / IPR027417 P-loop containing nucleoside triphosphate hydrolase
AT5G09610	0	0	0.123333	0.983333	0.973333	2.25667	0	0	0.0233333	0.03	2.58815e-06	0.923708	1		IPR001313 Pumilio RNA-binding repeat / IPR016024 Armadillo-type fold / IPR011989 Armadillo-like helical
AT5G37890	5.53667	5.31333	0.88	1.08667	2.83	3.61	5.35333	4.20333	1.3	1.07333	2.60215e-06	1	1	PF03145 Seven in absentia protein family	IPR018121 Seven-in-absentia protein, TRAF-like domain / IPR008974 TRAF-like / IPR004162 Seven-in-absentia protein, sina / IPR013083 Zinc finger, RING/FYVE/PHD-type / IPR013323 SIAH-type domain / IPR001841 Zinc finger, RING-type / IPR013010 Zinc finger, SIAH-type
AT2G13550	1.90667	1.87667	1.92667	4.71	0.583333	0.31	0.543333	0.09	2.64	11.4867	2.63758e-06	0.0414936	0.00099484
AT1G31750	1.94	2.98	0.106667	0	0.05	0.26	0	0.05	1.79	1.77667	2.65568e-06	1	1
AT5G50565	14.2	15.3033	6.43667	8.61	4.89667	7.45667	0	0.1	6.86333	15.2	2.66251e-06	1	1
AT5G08540	27.9233	30.0133	12.2	13.0167	18.8667	16.36	15.1833	16.4433	18.9833	17.4733	2.6806e-06	1	1
AT1G34844	1.96	3.07333	0	0	0	0	0	0	0	0	2.69269e-06	1	1
AT5G16010	72.6	74.28	40.4333	33.34	44.71	35.2133	48.6333	46.5033	54.1567	36.1333	2.72355e-06	1	1	PF02544 3-oxo-5-alpha-steroid 4-dehydrogenase	IPR001104 3-oxo-5-alpha-steroid 4-dehydrogenase, C-terminal
AT5G48630	18.2867	13.0233	8.58333	6.77333	8.75	8.31	8.80333	6.71667	7.67667	7.67	2.74029e-06	1	1	PF00134 Cyclin, N-terminal domain	IPR006671 Cyclin, N-terminal / IPR013763 Cyclin-like / IPR023598 Cyclin C / IPR015429 Cyclin C/H/T/L
AT2G34780	3.25667	3.96333	0.216667	0.243333	0.42	0.32	0.216667	0.226667	0.49	0.69	2.8749e-06	1	1
AT1G55680	34.13	59.9233	42.2267	76.8533	38.6733	65.9567	47.7967	66.87	56.71	150.867	2.87512e-06	6.58044e-08	0.00276124	PF00400 WD domain, G-beta repeat 893-931 938-975 1109-1147 1194-1232 1236-1273 1277-1315 1319-1357 1361-1399	IPR001680 WD40 repeat / IPR017986 WD40-repeat-containing domain / IPR015943 WD40/YVTN repeat-like-containing domain
AT1G02020	7.72	7.00667	2.67667	2.09667	3.88667	3.29	3.17667	2.10333	3.03333	1.77667	2.91218e-06	1	1	PF00881 Nitroreductase family / PF00881 Nitroreductase family / PF00881 Nitroreductase family	IPR000415 Nitroreductase-like
AT4G20440	22.2967	12.25	4.61	2.46667	8.33667	5.90667	3.43667	2.32	4.25667	4.09667	2.91964e-06	1	1	PF01423 LSM domain / PF01423 LSM domain	IPR001163 Ribonucleoprotein LSM domain / IPR010920 Like-Sm (LSM) domain / IPR017131 Small ribonucleoprotein associated, SmB/SmN / IPR006649 Ribonucleoprotein LSM domain, eukaryotic/archaea-type
AT5G16310	5.90667	8.37667	1.70667	2.75	2.04	1.96667	2.51333	3.13333	3.09667	5.17	2.93207e-06	1	1	PF01088 Ubiquitin carboxyl-terminal hydrolase, family 1	IPR001578 Peptidase C12, ubiquitin carboxyl-terminal hydrolase 1 / IPR017390 Ubiquitinyl hydrolase, UCH37 type
AT3G43440	7.42667	11.75	6.71	11.4	8.93333	11.6367	3.11667	4.54333	1.64667	3.20333	3.07044e-06	0.0293709	1	PF09425 Divergent CCT motif / PF09425 Divergent CCT motif / PF06200 tify domain / PF06200 tify domain	IPR018467 CO/COL/TOC1, conserved site / IPR010399 Tify
AT3G02515	1.31333	1.02667	0	0	0.0433333	0.04	0	0	0.0433333	0.236667	3.11706e-06	1	1
AT3G18610	0.49	0.48	2.82	2.45	2.02667	2.47	0.316667	0.336667	4.07	8.22333	3.14177e-06	1	1	PF00076 RNA recognition motif. (a.k.a. RRM, RBD, or RNP domain) / PF00076 RNA recognition motif. (a.k.a. RRM, RBD, or RNP domain)	IPR000504 RNA recognition motif domain / IPR012677 Nucleotide-binding, alpha-beta plait
AT1G64150	22.4533	26.8267	33.5833	30.2367	5.56667	3.83	28.7067	35.0833	32.1567	23.8733	3.14466e-06	1	1	PF01169 Uncharacterized protein family UPF0016 / PF01169 Uncharacterized protein family UPF0016	IPR001727 Uncharacterised protein family UPF0016
AT3G27997	0.896667	2.02667	0.07	0	0	0	1.51667	2.02333	0	0.0666667	3.1528e-06	1	1
AT2G03710	12.29	12.24	1.43333	3	14.44	12.2567	10.8867	10.8467	2.85667	1.85333	3.19746e-06	1	1	PF01486 K-box region / PF00319 SRF-type transcription factor (DNA-binding and dimerisation domain)	IPR002487 Transcription factor, K-box / IPR002100 Transcription factor, MADS-box
AT3G29390	14.3667	17.6467	2.23333	4.15333	19.2233	20.87	16.47	15.7067	2.70667	4.54	3.22029e-06	1	1
AT4G13195	3.11667	5.06	1.81	2.42	5.91667	10.19	0.973333	1.4	6.73	9.86	3.32642e-06	0.838131	1
AT5G43730	1.06667	1.88	2.13333	2.87	2.58	3.15333	3.86333	5.78	4.61	6.38333	3.34561e-06	0.250088	1	PF00931 NB-ARC domain / PF13855 Leucine rich repeat	IPR002182 NB-ARC / IPR000767 Disease resistance protein / IPR027417 P-loop containing nucleoside triphosphate hydrolase
AT1G71080	22.6433	31.1667	7.45	10.2067	31.3467	31.2433	24.0767	27.2167	8.56	15.53	3.35278e-06	1	1	PF09816 RNA polymerase II transcription elongation factor	IPR019194 Transcription elognation factor Eaf, N-terminal / IPR027093 EAF family
AT2G01470	20.1567	32.4667	15.19	28.01	7.26667	11.8233	7.83333	12.29	15.3267	42.5967	3.3669e-06	8.74652e-06	0.212502	PF00400 WD domain, G-beta repeat 893-931 938-975 1109-1147 1194-1232 1236-1273 1277-1315 1319-1357 1361-1399 / PF00400 WD domain, G-beta repeat 893-931 938-975 1109-1147 1194-1232 1236-1273 1277-1315 1319-1357 1361-1399 / PF00400 WD domain, G-beta repeat 893-931 938-975 1109-1147 1194-1232 1236-1273 1277-1315 1319-1357 1361-1399 / PF00400 WD domain, G-beta repeat 893-931 938-975 1109-1147 1194-12…	IPR001680 WD40 repeat / IPR015943 WD40/YVTN repeat-like-containing domain / IPR017986 WD40-repeat-containing domain
AT1G45180	3.22667	4.99333	5.72333	5.15333	1.26333	1.07	6.01333	6.52667	1.24333	1.10667	3.38365e-06	1	1	PF13639 Ring finger domain / PF13639 Ring finger domain	IPR001841 Zinc finger, RING-type / IPR013083 Zinc finger, RING/FYVE/PHD-type
AT4G30110	9.39	20.2167	35.41	81.9967	7.64333	14.3933	16.9967	15.8133	21.76	28.0367	3.39171e-06	0.179	0.488107	PF00122 E1-E2 ATPase / PF00702 haloacid dehalogenase-like hydrolase	IPR005834 Haloacid dehalogenase-like hydrolase / IPR008250 P-type ATPase, A domain / IPR006121 Heavy metal-associated domain, HMA / IPR023214 HAD-like domain / IPR023299 P-type ATPase, cytoplasmic domain N / IPR027256 Cation-transporting P-type ATPase, subfamily IB / IPR001757 Cation-transporting P-type ATPase / IPR018303 P-type ATPase, phosphorylation site / IPR027265 Divalent cation-transportin…
AT5G23250	12.34	11.4	5.81	5.09	5.94	4.65333	14.16	11.9267	7.69667	10.13	3.419e-06	1	1	PF00549 CoA-ligase / PF02629 CoA binding domain	IPR005811 ATP-citrate lyase/succinyl-CoA ligase / IPR003781 CoA-binding / IPR017440 ATP-citrate lyase/succinyl-CoA ligase, active site / IPR005810 Succinyl-CoA ligase, alpha subunit / IPR016040 NAD(P)-binding domain / IPR016102 Succinyl-CoA synthetase-like
AT1G57860	85.4233	41.4133	65.3567	47.19	21.8667	18.5533	25.9367	19.0967	16.72	17.48	3.43108e-06	0.600577	1	PF01157 Ribosomal protein L21e	IPR001147 Ribosomal protein L21e / IPR008991 Translation protein SH3-like domain / IPR018259 Ribosomal protein L21e, conserved site
AT1G58602	46.3467	73.1767	2.26667	1.09	5.82333	6.71	5.49667	4.23667	1.46	1.46667	3.4428e-06	1	1	PF00931 NB-ARC domain	IPR002182 NB-ARC / IPR027417 P-loop containing nucleoside triphosphate hydrolase / IPR000767 Disease resistance protein
AT4G22285	11.2833	16.9367	2.88333	3.14667	2.88667	3.63333	2.58333	2.3	4.10333	5.45333	3.47448e-06	1	1	PF00443 Ubiquitin carboxyl-terminal hydrolase / PF02148 Zn-finger in ubiquitin-hydrolases and other protein / PF00443 Ubiquitin carboxyl-terminal hydrolase	IPR001394 Peptidase C19, ubiquitin carboxyl-terminal hydrolase 2 / IPR001607 Zinc finger, UBP-type / IPR013083 Zinc finger, RING/FYVE/PHD-type
AT2G01090	19.26	19.7967	15.26	19.57	15.9933	19.59	0	0.15	21.6067	31.9933	3.53797e-06	1	1	PF02320 Ubiquinol-cytochrome C reductase hinge protein	IPR023184 Ubiquinol-cytochrome C reductase hinge domain / IPR003422 Cytochrome b-c1 complex, subunit 6
AT1G63660	12.0367	7.71	4.05667	2.66333	13.6933	8.05	4.28333	1.83667	17.9167	15.8567	3.6993e-06	1	1	PF00958 GMP synthase C terminal domain / PF00117 Glutamine amidotransferase class-I / PF00733 Asparagine synthase / PF00733 Asparagine synthase	IPR001674 GMP synthase, C-terminal / IPR017926 Glutamine amidotransferase / IPR001962 Asparagine synthase / IPR022955 GMP synthase / IPR025777 GMP synthetase ATP pyrophosphatase domain / IPR014729 Rossmann-like alpha/beta/alpha sandwich fold / IPR004739 GMP synthase, N-terminal
AT5G49290	0.183333	0.39	0.113333	0.25	0.07	0.12	0.12	0.19	0.58	1.34333	3.74467e-06	0.303857	1	PF00560 Leucine Rich Repeat 17-38 40-61 / PF00560 Leucine Rich Repeat 17-38 40-61 / PF00560 Leucine Rich Repeat 17-38 40-61 / PF08263 Leucine rich repeat N-terminal domain / PF13516 Leucine Rich repeat / PF13855 Leucine rich repeat / PF13855 Leucine rich repeat / PF13855 Leucine rich repeat	IPR013210 Leucine-rich repeat-containing N-terminal, type 2 / IPR001611 Leucine-rich repeat
AT1G32990	233.887	140.813	680.957	379.357	463.07	241.35	260.683	168.417	271.593	98.2433	3.76976e-06	9.73446e-05	1	PF00298 Ribosomal protein L11, RNA binding domain / PF03946 Ribosomal protein L11, N-terminal domain	IPR020784 Ribosomal protein L11, N-terminal / IPR020783 Ribosomal protein L11, C-terminal / IPR006519 Ribosomal protein L11, bacterial-type / IPR000911 Ribosomal protein L11 / IPR020785 Ribosomal protein L11, conserved site
AT4G17830	27.67	50.1167	32.63	46.1367	32.5067	45.8267	30.17	30.17	39.36	77.39	3.83603e-06	2.06391e-07	0.0033698	PF01546 Peptidase family M20/M25/M40 / PF07687 Peptidase dimerisation domain / PF07687 Peptidase dimerisation domain	IPR002933 Peptidase M20 / IPR011650 Peptidase M20, dimerisation domain
AT5G43460	59.48	52.24	27.0467	36.7567	43.47	52.0233	17.5367	19.48	65.41	116.68	3.93939e-06	1	1	PF05514 HR-like lesion-inducing	IPR008637 HR-like lesion-inducer
AT1G66990	0.0466667	0.16	1.61667	2.57	1.95333	2.37333	0	0	0	0.07	4.02022e-06	1	1
AT4G09480	0.463333	1.31	0.583333	0.676667	0.163333	0.23	0	0.0766667	3.87333	7.12	4.02449e-06	1	1
AT5G17990	33.51	53.0233	13.9967	14.76	18.06	15.5467	13.4267	14.36	17.36	11.6033	4.03908e-06	1	1	PF00591 Glycosyl transferase family, a/b domain / PF02885 Glycosyl transferase family, helical bundle domain	IPR017459 Glycosyl transferase family 3, N-terminal domain / IPR000312 Glycosyl transferase, family 3 / IPR005940 Anthranilate phosphoribosyl transferase
AT1G02500	230.957	202.807	296.337	319.253	222.163	238.137	83.6567	74.5533	372.607	323.517	4.05963e-06	1	1	PF00438 S-adenosylmethionine synthetase, N-terminal domain / PF02773 S-adenosylmethionine synthetase, C-terminal domain / PF02772 S-adenosylmethionine synthetase, central domain	IPR022628 S-adenosylmethionine synthetase, N-terminal / IPR022630 S-adenosylmethionine synthetase, C-terminal / IPR022629 S-adenosylmethionine synthetase, central domain / IPR002133 S-adenosylmethionine synthetase / IPR022631 S-adenosylmethionine synthetase, conserved site / IPR022636 S-adenosylmethionine synthetase superfamily
AT2G21830	3.32	3.21	7.31333	5.66333	4.18667	5.60667	0.636667	1.01333	0.303333	0.196667	4.05967e-06	1	1	PF07649 C1-like domain / PF07649 C1-like domain / PF07649 C1-like domain	IPR011424 C1-like / IPR001965 Zinc finger, PHD-type / IPR002219 Protein kinase C-like, phorbol ester/diacylglycerol binding
AT1G64520	47.9667	48.8133	39.7667	57.3933	17.8867	17.4567	14.96	18.74	38.47	72.8367	4.07269e-06	1	1	PF03399 SAC3/GANP/Nin1/mts3/eIF-3 p25 family 2-70	IPR005062 SAC3/GANP/Nin1/mts3/eIF-3 p25 / IPR006746 26S proteasome non-ATPase regulatory subunit Rpn12
AT3G55530	8.53	10.0833	14.5933	18.8	13.45	16.5467	14.58	16.26	14.09	30.1033	4.10317e-06	0.000141811	0.00457717	PF13639 Ring finger domain	IPR001841 Zinc finger, RING-type / IPR013083 Zinc finger, RING/FYVE/PHD-type
AT3G20230	47.8367	46.73	18.3367	16.56	58.99	46.4433	52.4033	48.8133	54.84	49.5467	4.21116e-06	1	1	PF00861 Ribosomal L18p/L5e family	IPR005484 Ribosomal protein L18/L5
AT3G14660	32.22	49.9	37.9833	58.9	72.1467	95.3367	55.5167	82.2833	60.16	57.47	4.33743e-06	0.00126515	1	PF00067 Cytochrome P450	IPR001128 Cytochrome P450 / IPR002401 Cytochrome P450, E-class, group I
AT3G58270	1.37333	5.43	0.0333333	0.543333	0.33	0.42	3.44333	6.88333	0	1.06	4.41084e-06	0.0298796	1	PF05278 Arabidopsis phospholipase-like protein (PEARLI 4) / PF00917 MATH domain	IPR007942 Phospholipase-like, arabidopsis / IPR008974 TRAF-like / IPR002083 MATH
AT3G44620	40.9033	43.5733	29.56	33.1967	31.7633	34.0633	12.55	12.45	36.54	33.1667	4.4312e-06	1	1	PF01451 Low molecular weight phosphotyrosine protein phosphatase	IPR023485 Phosphotyrosine protein phosphatase I superfamily / IPR000106 Protein-tyrosine phosphatase/arsenate reductase / IPR017867 Protein-tyrosine phosphatase, low molecular weight
AT1G68710	1.77667	5.81333	2.75	7.56333	2.93333	4.66333	3.73667	5.01	4.02	11.52	4.45182e-06	5.48481e-10	0.000546667	PF12710 haloacid dehalogenase-like hydrolase / PF00122 E1-E2 ATPase	IPR008250 P-type ATPase, A domain / IPR006539 Phospholipid-transporting P-type ATPase, subfamily IV / IPR001757 Cation-transporting P-type ATPase / IPR023299 P-type ATPase, cytoplasmic domain N / IPR023214 HAD-like domain / IPR018303 P-type ATPase, phosphorylation site
AT1G33540	0	0	0.0866667	0	0	0	0.07	0	0.306667	1.01667	4.45975e-06	1	0.0371557	PF00450 Serine carboxypeptidase / PF00450 Serine carboxypeptidase	IPR001563 Peptidase S10, serine carboxypeptidase
AT4G17270	21.1233	33.0567	21.2633	35.7133	15.38	19.39	27.2467	35.0567	26.6567	60.0633	4.53105e-06	1.31711e-06	0.0202566	PF08569 Mo25-like	IPR013878 Mo25-like / IPR016024 Armadillo-type fold / IPR011989 Armadillo-like helical
AT1G50300	7.41	7.00667	3.54333	3.76	3.25	3.96333	3.72667	3.15	3.30667	3.91333	4.68292e-06	1	1	PF00076 RNA recognition motif. (a.k.a. RRM, RBD, or RNP domain) / PF00641 Zn-finger in Ran binding protein and others 148-174 / PF00641 Zn-finger in Ran binding protein and others 148-174	IPR000504 RNA recognition motif domain / IPR001876 Zinc finger, RanBP2-type / IPR012677 Nucleotide-binding, alpha-beta plait
AT5G56000	7.59333	9.09667	10	10.5	11.6467	11.8333	9.39667	7.87	12.6367	23.5567	4.77458e-06	1	0.01645	PF00183 Hsp90 protein / PF13589 Histidine kinase-, DNA gyrase B-, and HSP90-like ATPase	IPR001404 Heat shock protein Hsp90 / IPR020575 Heat shock protein Hsp90, N-terminal / IPR003594 Histidine kinase-like ATPase, ATP-binding domain / IPR019805 Heat shock protein Hsp90, conserved site / IPR020568 Ribosomal protein S5 domain 2-type fold
AT4G33780	18.76	32.6733	8.65	17.71	11.1067	16.1967	11.6067	20.7567	11.8733	35.4733	4.77956e-06	5.01277e-09	0.0211192
AT4G32208	0	0.06	0	0.0433333	0	0.0733333	9.66667	5.41667	13.15	28.51	4.88878e-06	1	1	PF00012 Hsp70 protein	IPR013126 Heat shock protein 70 family
AT1G23935	0.31	0.486667	2.02667	1.45333	2.34333	1.39667	0.0166667	0	0.03	0	4.90597e-06	1	1	PF05918 Apoptosis inhibitory protein 5 (API5) / PF05918 Apoptosis inhibitory protein 5 (API5)	IPR008383 Apoptosis inhibitory 5
AT5G05400	0.24	0.643333	0.05	0	1.15	2.16667	0.55	0.95	0	0	4.91739e-06	1	1	PF00931 NB-ARC domain / PF13855 Leucine rich repeat / PF13855 Leucine rich repeat	IPR002182 NB-ARC / IPR000767 Disease resistance protein / IPR003591 Leucine-rich repeat, typical subtype / IPR027417 P-loop containing nucleoside triphosphate hydrolase
AT2G24150	37.9667	34.2767	33.06	35.0333	5.02333	6.47	6.08333	6.01333	12.4433	8.8	4.96136e-06	1	1	PF03006 Haemolysin-III related	IPR004254 Hly-III-related
AT1G17590	1.72	3.98	4.58	9.41	5.8	9.44333	3.05667	2.55667	6.53667	17.51	4.96801e-06	0.000392349	0.0945628	PF02045 CCAAT-binding transcription factor (CBF-B/NF-YA) subunit B	IPR001289 CCAAT-binding transcription factor, subunit B / IPR018362 CCAAT-binding factor, conserved site
AT3G55290	2.60333	6.14333	0.893333	1.95667	1.76333	1.60333	0.76	2.65	0.676667	1.36	5.06644e-06	0.00086184	0.203035	PF00106 short chain dehydrogenase	IPR002198 Short-chain dehydrogenase/reductase SDR / IPR002347 Glucose/ribitol dehydrogenase / IPR016040 NAD(P)-binding domain / IPR020904 Short-chain dehydrogenase/reductase, conserved site
AT1G80970	1.00667	1.27667	0	0	0	0	0	0	0	0	5.21758e-06	1	1	PF03469 XH domain	IPR005379 Uncharacterised domain XH
AT1G67870	448.327	592.757	283.91	390.243	269.133	330.287	315.073	429.777	203.307	178.297	5.26544e-06	0.532451	1
AT3G26230	13.7267	24.3567	4.8	3.40333	11.7833	3.67	4.17667	3.44333	3.13667	1.50333	5.30512e-06	1	0.464929	PF00067 Cytochrome P450	IPR001128 Cytochrome P450 / IPR017972 Cytochrome P450, conserved site / IPR002401 Cytochrome P450, E-class, group I
AT3G18870	6.10667	4.40667	0.876667	0.86	0.963333	0.916667	6.55667	5.15	0.956667	1.26667	5.42881e-06	1	1	PF02536 mTERF	IPR003690 Mitochodrial transcription termination factor-related
AT3G46320	28.7167	19.5	4.34667	2.67	5.39667	3.58667	3.09667	1.80667	5.01333	4.12	5.55318e-06	1	1	PF00125 Core histone H2A/H2B/H3/H4	IPR007125 Histone core / IPR001951 Histone H4 / IPR009072 Histone-fold / IPR019809 Histone H4, conserved site
AT1G60660	14.6767	10.3233	6.54	3.37	3.6	2.62667	14.0133	11.2333	5.40667	7.17	5.58162e-06	1	1	PF00173 Cytochrome b5-like Heme/Steroid binding domain	IPR001199 Cytochrome b5-like heme/steroid binding domain / IPR018506 Cytochrome b5, heme-binding site
AT1G69485	0.33	0.333333	0.763333	1.35667	0.05	0.17	0.4	0.38	1.64333	2.89333	5.64977e-06	1	1	PF01783 Ribosomal L32p protein family	IPR002677 Ribosomal protein L32p / IPR011332 Ribosomal protein, zinc-binding domain
AT4G11080	1.32	2.19	0.203333	0.11	0.27	0.0266667	1.63	3.04333	0.1	0.06	5.747e-06	1	1	PF00505 HMG (high mobility group) box 78-152 / PF00505 HMG (high mobility group) box 78-152 / PF00505 HMG (high mobility group) box 78-152	IPR009071 High mobility group (HMG) box domain
AT5G38710	3.95	4.01333	1.25333	1.96333	24.31	5.93667	4.32667	1.57333	0.6	1.36333	5.78381e-06	0.533774	0.00244187	PF01619 Proline dehydrogenase / PF01619 Proline dehydrogenase	IPR002872 Proline dehydrogenase / IPR015659 Proline oxidase
AT3G51250	17.6967	22.2233	8.28	8.78333	8.69333	8.68667	15.8133	13.1367	8.69	11.0533	5.98784e-06	1	1	PF06911 Senescence-associated protein	IPR009686 Senescence/spartin-associated
AT5G49640	23.4967	30.07	12.7933	22.3567	18.14	22.9967	0.0833333	0	0.0966667	0.183333	6.21156e-06	1	1
AT1G52770	0.723333	2.50667	1.52667	1.42667	0.853333	0.796667	1.15	0.59	5.17667	6.64333	6.34588e-06	1	1	PF03000 NPH3 family	IPR004249 NPH3 / IPR027356 NPH3 domain
AT4G19840	223.44	313.31	84.09	140.123	54.67	100.82	188.613	297.853	129.793	232.817	6.43108e-06	0.00287707	1	PF14299 Phloem protein 2	IPR025886 Phloem protein 2-like
AT2G47220	3.04667	3.05667	0.47	0.353333	3.81333	3.36333	3.80333	3.27333	4.1	4.15	6.48e-06	1	1	PF05266 Protein of unknown function (DUF724)	IPR007930 Protein of unknown function DUF724 / IPR020568 Ribosomal protein S5 domain 2-type fold / IPR027408 PNPase/RNase PH domain
AT4G08390	57.1933	62.31	81.24	63.1967	76.89	68	50.1567	43.0467	120.203	104.027	6.5901e-06	1	1	PF00141 Peroxidase 66-392	IPR002016 Haem peroxidase, plant/fungal/bacterial / IPR019793 Peroxidases heam-ligand binding site / IPR002207 Plant ascorbate peroxidase / IPR010255 Haem peroxidase
AT1G59840	14.06	10.3667	13.6167	9.71333	5.85	3.74	3.14333	2.26667	18.2067	9.9	6.71209e-06	0.139548	1	PF11152 Protein of unknown function (DUF2930)	IPR021325 Protein of unknown function DUF2930
AT3G44870	0	0	0	0	0	0	1.16333	0.973333	0	0	6.94968e-06	1	1	PF03492 SAM dependent carboxyl methyltransferase	IPR005299 SAM dependent carboxyl methyltransferase
AT1G14090	0.59	1.00333	0.383333	0.33	1.30667	1.42667	0.136667	0.1	0.21	0.193333	6.95309e-06	1	1
AT4G29200	0	0	0.03	0	0.0266667	0.02	0	0	19.9733	23.2833	7.14537e-06	1	1		IPR001944 Glycoside hydrolase, family 35
AT5G57040	150.32	188.517	70.0767	80.7267	65.11	88.9167	174.123	231.32	92.69	97.2433	7.1733e-06	1	1	PF12681 Glyoxalase-like domain	IPR025870 Glyoxalase-like domain
AT1G73180	14.24	10.9867	6.19667	6.55333	20.11	19.9267	21.4067	17.05	6.03667	9.45	7.21148e-06	1	1	PF08662 Eukaryotic translation initiation factor eIF2A	IPR013979 Translation initiation factor, beta propellor-like domain / IPR011387 Translation initiation factor 2A / IPR015943 WD40/YVTN repeat-like-containing domain
AT5G45095	0.0766667	0.0766667	0	0	2.75333	1.03	0	0	2.74333	1.38	7.23111e-06	1	1
AT1G30580	72.3567	82.52	76.9633	89.0333	86.0367	90.4867	86.9967	79.4633	90.22	140.32	7.30565e-06	0.00831012	0.00193361	PF01926 GTPase of unknown function / PF06071 Protein of unknown function (DUF933) / PF01926 GTPase of unknown function	IPR006073 GTP binding domain / IPR013029 Domain of unknown function DUF933 / IPR004396 Conserved hypothetical protein CHP00092 / IPR027417 P-loop containing nucleoside triphosphate hydrolase / IPR012676 TGS-like / IPR023192 TGS-like domain / IPR012675 Beta-grasp domain
AT3G47360	2.34667	3.22	3.90333	11.7733	0	0	0.323333	0.433333	3.33	13.44	7.32668e-06	0.00630343	0.0389942	PF00106 short chain dehydrogenase	IPR002198 Short-chain dehydrogenase/reductase SDR / IPR002347 Glucose/ribitol dehydrogenase / IPR020904 Short-chain dehydrogenase/reductase, conserved site / IPR016040 NAD(P)-binding domain
AT3G28740	0.346667	0.24	3.41667	4.24	11.4867	7.81333	1.61667	2.59333	3.91333	0.0833333	7.3826e-06	1	1	PF00067 Cytochrome P450	IPR001128 Cytochrome P450 / IPR002401 Cytochrome P450, E-class, group I / IPR017972 Cytochrome P450, conserved site
AT3G43510	3.37333	5.76667	1.16667	1.01	1.48	0.766667	0.636667	0.686667	2.85	5.32	7.39537e-06	1	1
AT1G35112	5.39667	9.27	0.09	0	0.04	0.03	14.7067	18.48	8.65667	10.38	7.42755e-06	1	1
AT2G29420	9.06333	18.02	10.4367	17.42	19.6233	13.6167	7.35	7.98667	23.41	43.0933	7.45067e-06	1	0.600785	PF00043 Glutathione S-transferase, C-terminal domain / PF13417 Glutathione S-transferase, N-terminal domain	IPR004046 Glutathione S-transferase, C-terminal / IPR010987 Glutathione S-transferase, C-terminal-like / IPR012336 Thioredoxin-like fold / IPR004045 Glutathione S-transferase, N-terminal / IPR017933 Glutathione S-transferase/chloride channel, C-terminal
AT1G20590	0.05	0	1.44	2.45667	3.08	3.32	0.373333	0.373333	0.733333	2.22	7.47795e-06	1	1	PF02984 Cyclin, C-terminal domain / PF00134 Cyclin, N-terminal domain	IPR004367 Cyclin, C-terminal domain / IPR006671 Cyclin, N-terminal / IPR013763 Cyclin-like / IPR014400 Cyclin A/B/D/E
AT2G16140	0.0633333	0.0566667	0.303333	0.4	1.22667	1.36333	0.03	0.0866667	0.0433333	0.13	7.64614e-06	1	1
AT5G42240	20.3367	18.35	17.89	16.7	5.8	4.14333	9.49	10.4333	5.30333	4.61333	7.70286e-06	1	1	PF00450 Serine carboxypeptidase	IPR001563 Peptidase S10, serine carboxypeptidase / IPR018202 Peptidase S10, serine carboxypeptidase, active site
AT1G63050	6.49	6.71667	11.19	13.6633	13.76	17.0867	12.2533	11.82	17.8167	21.41	7.93083e-06	1	1	PF03062 MBOAT family / PF03062 MBOAT family	IPR004299 Membrane bound O-acyl transferase, MBOAT
AT1G69750	12.3933	11.5133	17.63	26.01	9.15667	10.3433	2.89667	3.49333	22.6767	52.69	8.04835e-06	1	1	PF06747 CHCH domain	IPR010625 CHCH
AT5G45460	0.756667	0.756667	0	0	0	0	0	0	0	0	8.07825e-06	1	1	PF13968 Domain of unknown function (DUF4220)	IPR025315 Domain of unknown function DUF4220
AT5G40950	433.033	298.897	350.873	182.54	328.323	179.583	53.6033	37.2433	412.98	167.973	8.08625e-06	0.000173556	1	PF01016 Ribosomal L27 protein	IPR001684 Ribosomal protein L27 / IPR018261 Ribosomal protein L27, conserved site
AT5G58210	2.96	2.23667	0.916667	1.37667	1.03667	1.10667	3.27667	1.97667	3.25333	7.31333	8.10708e-06	1	0.0295185
AT5G37830	8.78667	14.84	11.9333	15.8867	1.88	2.07	1.77667	1.51667	8.90333	12.1933	8.14556e-06	1	1	PF01968 Hydantoinase/oxoprolinase / PF02538 Hydantoinase B/oxoprolinase / PF05378 Hydantoinase/oxoprolinase N-terminal region	IPR002821 Hydantoinase/oxoprolinase / IPR003692 Hydantoinase B/oxoprolinase / IPR008040 Hydantoinaseoxoprolinase, N-terminal
AT4G11320	0.746667	3.85333	1.11667	1.04333	14.1833	4.81333	0.06	1.41667	4.43667	3.5	8.16051e-06	1	0.00683646	PF00112 Papain family cysteine protease / PF08246 Cathepsin propeptide inhibitor domain (I29)	IPR000668 Peptidase C1A, papain C-terminal / IPR013201 Proteinase inhibitor I29, cathepsin propeptide / IPR025660 Cysteine peptidase, histidine active site / IPR013128 Peptidase C1A, papain
AT1G14770	1.98667	3.46667	2.55333	5.45333	4.17	7.11667	0.936667	1.43333	1.37333	2.91667	8.20838e-06	0.0008569	1		IPR013083 Zinc finger, RING/FYVE/PHD-type / IPR011011 Zinc finger, FYVE/PHD-type / IPR019786 Zinc finger, PHD-type, conserved site
AT5G58980	4.23667	7.95667	1.91	3.4	1.87	3.39667	1.44	1.91667	5.25	10.69	8.28384e-06	0.00754395	1	PF04734 Neutral/alkaline non-lysosomal ceramidase	IPR006823 Neutral/alkaline nonlysosomal ceramidase
AT1G76530	0.9	4.49	2.07667	5.97	0.88	3.34667	2.22333	2.9	21.9767	16.6	8.33351e-06	1	1	PF03547 Membrane transport protein	IPR004776 Auxin efflux carrier
AT5G25760	20.7267	28.4667	7.51667	12.5	8.98333	12.0467	8.09667	14.58	10.53	21.1367	8.34991e-06	0.000967045	1	PF00179 Ubiquitin-conjugating enzyme	IPR000608 Ubiquitin-conjugating enzyme, E2 / IPR016135 Ubiquitin-conjugating enzyme/RWD-like / IPR023313 Ubiquitin-conjugating enzyme, active site
AT5G25040	11.04	20.0333	5.74	5.38667	4.36667	7.96667	5.20333	3.57	0.59	0.676667	8.48546e-06	1	1	PF03092 BT1 family	IPR004324 Biopterin transport-related protein BT1 / IPR016196 Major facilitator superfamily domain, general substrate transporter
AT3G44010	186.717	98.29	104.29	88.78	47.5267	35.82	16.5533	17.2633	52.75	104.173	8.60577e-06	1	0.440694	PF00253 Ribosomal protein S14p/S29e	IPR001209 Ribosomal protein S14
AT1G03410	7.85	6.58	5.04	4.26	3.08667	1.88667	1.40333	0.853333	2.50667	1.42333	8.63366e-06	1	1	PF03171 2OG-Fe(II) oxygenase superfamily / PF14226 non-haem dioxygenase in morphine synthesis N-terminal	IPR005123 Oxoglutarate/iron-dependent dioxygenase / IPR027443 Isopenicillin N synthase-like / IPR026992 Non-haem dioxygenase N-terminal domain
AT5G47260	0	0.0433333	0.686667	0.64	0.92	0.806667	1.68333	1.07667	1.67	1.7	8.66419e-06	1	1	PF00931 NB-ARC domain / PF04548 AIG1 family / PF13855 Leucine rich repeat	IPR006703 AIG1 / IPR002182 NB-ARC / IPR003593 AAA+ ATPase domain / IPR000767 Disease resistance protein / IPR027417 P-loop containing nucleoside triphosphate hydrolase
AT1G48560	0.716667	1.52333	0.533333	1.47667	0.716667	1.70333	0.953333	1.62667	1.53333	4.45667	8.7002e-06	2.70642e-06	0.117222
AT5G09443	2.92	2.82667	5.87	12.2367	0.0633333	0	5.43	5.69	10.0067	16.7567	8.77928e-06	1	1
AT1G74240	1.73667	2.91333	2.00333	2.64	2.7	3.19	4.27667	3.83333	4.21333	9.71333	8.8814e-06	0.1651	0.0489503	PF00153 Mitochondrial carrier protein / PF00153 Mitochondrial carrier protein / PF00153 Mitochondrial carrier protein / PF00153 Mitochondrial carrier protein	IPR018108 Mitochondrial substrate/solute carrier / IPR023395 Mitochondrial carrier domain / IPR002067 Mitochondrial carrier protein
AT2G22905	0.5	0.87	0	0.176667	0.1	0.276667	0.996667	3.41	0	0.07	8.90468e-06	0.416351	0.184543
AT1G31355	0.436667	0.9	0.0433333	0	0	0	0	0	0	0	9.02097e-06	1	1
AT5G32621	0.07	0.0233333	0	0	0	0	2.10667	0.616667	0.0166667	0	9.17118e-06	1	0.189348
AT1G51850	0.336667	0.523333	0.293333	0.206667	1.21667	1.02	0.273333	0.0366667	1.43333	2.97667	9.17161e-06	1	1	PF00069 Protein kinase domain / PF12819 Carbohydrate-binding protein of the ER / PF13855 Leucine rich repeat / PF13855 Leucine rich repeat	IPR000719 Protein kinase, catalytic domain / IPR024788 Malectin-like carbohydrate-binding domain / IPR008271 Serine/threonine-protein kinase, active site / IPR013320 Concanavalin A-like lectin/glucanase, subgroup / IPR011009 Protein kinase-like domain / IPR017441 Protein kinase, ATP binding site / IPR001611 Leucine-rich repeat
AT1G65300	0	0	0	0	0.573333	5.03667	0	0	0.04	0.0566667	9.21607e-06	0.337232	0.000477691	PF00319 SRF-type transcription factor (DNA-binding and dimerisation domain)	IPR002100 Transcription factor, MADS-box
AT1G31280	4.98333	9.00667	6.03333	9.01333	5.86667	10.3233	11.5267	13.9967	14.81	33.25	9.32494e-06	0.0149134	1	PF02170 PAZ domain / PF02171 Piwi domain / PF02171 Piwi domain / PF08699 Domain of unknown function (DUF1785)	IPR014811 Domain of unknown function DUF1785 / IPR003100 Argonaute/Dicer protein, PAZ / IPR003165 Stem cell self-renewal protein Piwi / IPR012337 Ribonuclease H-like domain
AT1G28670	16.88	11.8867	3.35	1.59667	0.5	1.71667	2.67667	1.52667	3.80667	5.45667	9.55349e-06	1	1	PF00657 GDSL-like Lipase/Acylhydrolase	IPR001087 Lipase, GDSL / IPR013831 SGNH hydrolase-type esterase domain
AT1G32860	3.68333	5.39	5.76	6.06333	23.67	5.19333	4.60667	5.05	3.27667	2.34333	9.71137e-06	0.226746	3.65275e-05	PF00332 Glycosyl hydrolases family 17	IPR000490 Glycoside hydrolase, family 17 / IPR013781 Glycoside hydrolase, catalytic domain / IPR017853 Glycoside hydrolase, superfamily
AT4G36660	22.9033	30.3533	4.57667	4.57333	3.15333	6.6	5.54667	5.69333	6.06667	11.3133	9.75786e-06	1	1	PF06708 Protein of unknown function (DUF1195)	IPR010608 Protein of unknown function DUF1195
AT1G08530	12.18	14.1367	4.75667	6.11333	4.73	6.96333	6.04	6.58	3.84333	8.50667	1.00031e-05	0.937197	1
AT5G16990	18.22	31.45	8.02333	31.07	8.13667	22.3267	3.58	7.90333	10.5833	55.8033	1.00191e-05	3.96901e-08	0.00125556	PF00107 Zinc-binding dehydrogenase	IPR013149 Alcohol dehydrogenase, C-terminal / IPR020843 Polyketide synthase, enoylreductase / IPR011032 GroES-like / IPR002085 Alcohol dehydrogenase superfamily, zinc-type / IPR016040 NAD(P)-binding domain
AT3G52960	174.327	93.53	198.133	99.6267	189.553	121.437	177.433	106.587	86.54	31.83	1.00715e-05	6.05051e-08	1	PF08534 Redoxin	IPR013740 Redoxin / IPR012336 Thioredoxin-like fold
AT5G15820	2.05	2.67333	2.56333	2.92333	2.37333	3.68333	1.00667	0.946667	2.21333	4.31333	1.03515e-05	0.00655976	1	PF13639 Ring finger domain / PF13639 Ring finger domain	IPR001841 Zinc finger, RING-type / IPR013083 Zinc finger, RING/FYVE/PHD-type
AT3G63090	1.83667	2.22667	1.89	2.70667	2.39	2.46	2.5	2.52667	3.16667	7.86	1.03688e-05	0.0515356	0.00644118	PF11955 Plant organelle RNA recognition domain	IPR021099 Plant organelle RNA recognition domain
AT5G43910	4.26667	7.03	1.07	1.29333	1.54667	0.933333	2.32667	0.68	8.54	11.35	1.04433e-05	1	1	PF00294 pfkB family carbohydrate kinase	IPR011611 Carbohydrate kinase PfkB / IPR002139 Ribokinase / IPR002173 Carbohydrate/puine kinase, PfkB, conserved site
AT5G03345	36.0467	33.9967	0.43	0.363333	5.85333	7.5	4.44333	8.97333	5.28667	11.5233	1.04691e-05	1	1	PF10270 Transmembrane protein precursor 32	IPR018937 Magnesium transporter
AT1G71070	11.6533	13.5967	12.5367	12.62	11.4533	10.7533	3.83	3.45	10.2867	11.3767	1.05864e-05	1	1	PF02485 Core-2/I-Branching enzyme	IPR003406 Glycosyl transferase, family 14
AT5G18040	10.0767	11.27	1.49	3.70667	1.07667	3.35667	1.20333	3.67	2.07	6.99	1.07855e-05	0.296281	1
AT4G16920	0.433333	0.473333	2.94	3.26667	0.883333	1.08	1.36333	1.30333	12.4333	14.1133	1.09566e-05	1	1	PF07725 Leucine Rich Repeat / PF07725 Leucine Rich Repeat / PF07725 Leucine Rich Repeat / PF00931 NB-ARC domain / PF01582 TIR domain / PF00560 Leucine Rich Repeat 17-38 40-61 / PF00560 Leucine Rich Repeat 17-38 40-61 / PF00560 Leucine Rich Repeat 17-38 40-61 / PF00560 Leucine Rich Repeat 17-38 40-61	IPR011713 Leucine-rich repeat 3 / IPR002182 NB-ARC / IPR000157 Toll/interleukin-1 receptor homology (TIR) domain / IPR001611 Leucine-rich repeat / IPR003593 AAA+ ATPase domain / IPR027417 P-loop containing nucleoside triphosphate hydrolase / IPR000767 Disease resistance protein
AT2G03220	5.45333	9.36	7.74667	12.1267	9.37667	10.8667	5.3	5.05	9.72333	11.5967	1.11572e-05	0.00485957	1	PF03254 Xyloglucan fucosyltransferase	IPR004938 Xyloglucan fucosyltransferase
AT3G24542	0	0.09	9.21667	10.1233	11.3067	11.7933	16.9233	11.9467	13.23	9.4	1.11694e-05	1	1
AT5G38590	3.57667	5.47667	3.19333	5.28	1.58667	1.99	1.15667	0.82	2.28667	1.99	1.11722e-05	1	1	PF00646 F-box domain / PF07723 Leucine Rich Repeat / PF08387 FBD / PF00646 F-box domain	IPR001810 F-box domain, cyclin-like / IPR013101 Leucine-rich repeat 2 / IPR006566 FBD
AT5G28750	204.457	116.163	194.863	118.607	11.9167	7.14	261.37	175.3	192.577	134.923	1.12072e-05	0.0913302	1	PF02416 mttA/Hcf106 family	IPR003369 Sec-independent protein translocase protein TatA/B/E / IPR006312 Sec-independent protein translocase protein TatA/E
AT3G29120	2.12333	1.98	0	0	0	0	0	0	0	0	1.12216e-05	1	1
AT1G51270	8.74	11.3633	0.0433333	0.0166667	0.0433333	0.0233333	0	0	12.9767	31	1.15337e-05	1	1	PF00635 MSP (Major sperm protein) domain / PF00635 MSP (Major sperm protein) domain / PF01582 TIR domain / PF00635 MSP (Major sperm protein) domain	IPR000535 Major sperm protein / IPR000157 Toll/interleukin-1 receptor homology (TIR) domain / IPR008962 PapD-like
AT2G03070	4.27333	6.07333	12.2167	12.56	7.23333	7.13667	9.05	6.81667	8.23333	8.43333	1.15492e-05	1	1
AT2G27290	98.1433	103.48	50.6867	70.9967	50.4767	58.4	105.71	121.74	59.4867	58.1967	1.15863e-05	1	1	PF06916 Protein of unknown function (DUF1279)	IPR009688 Domain of unknown function DUF1279
AT2G40240	1.43667	0.933333	0.36	0.446667	2.65667	1.44	0.666667	0.293333	2.52	2.47	1.15943e-05	1	1	PF01535 PPR repeat 10-34 52-76 94-118 / PF01535 PPR repeat 10-34 52-76 94-118 / PF12854 PPR repeat / PF01535 PPR repeat 10-34 52-76 94-118 / PF01535 PPR repeat 10-34 52-76 94-118	IPR002885 Pentatricopeptide repeat
AT1G51380	0.763333	0.513333	1.25	0.82	1.28	1.07333	1.20333	0.593333	1.64333	4.73	1.17068e-05	1	0.00140424	PF00271 Helicase conserved C-terminal domain / PF00270 DEAD/DEAH box helicase	IPR001650 Helicase, C-terminal / IPR011545 DNA/RNA helicase, DEAD/DEAH box type, N-terminal / IPR014001 Helicase, superfamily 1/2, ATP-binding domain / IPR014014 RNA helicase, DEAD-box type, Q motif / IPR027417 P-loop containing nucleoside triphosphate hydrolase
AT5G09250	16.9667	15.4767	13.1767	17.7267	3.88333	2.82333	16.1433	17.9767	16.6233	28.32	1.17694e-05	1	1	PF02229 Transcriptional Coactivator p15 (PC4) / PF02229 Transcriptional Coactivator p15 (PC4)	IPR003173 Transcriptional coactivator p15 / IPR009044 ssDNA-binding transcriptional regulator
AT3G30110	0	0	0	0	0.0433333	0.04	0.786667	1.40667	0.76	1.33333	1.17779e-05	1	1
AT4G37000	47.0267	64.7733	30.1767	54.27	10.13	18.4467	28.9567	48.5933	9.20333	16.6767	1.21912e-05	0.063303	1	PF06405 Red chlorophyll catabolite reductase (RCC reductase)	IPR009439 Red chlorophyll catabolite reductase
AT5G55940	29.54	30.5433	11.4033	14.4867	12.5667	15.3	11.8	15.54	9.45	22.5767	1.25457e-05	1	1	PF03665 Uncharacterised protein family (UPF0172)	IPR005366 Uncharacterised protein family UPF0172
AT1G60730	7.14333	9.34333	0.443333	2.42	9.91333	15.8667	4.14333	1.11	1.38	4.94667	1.25508e-05	1	1	PF00248 Aldo/keto reductase family	IPR023210 NADP-dependent oxidoreductase domain / IPR001395 Aldo/keto reductase
AT5G45360	22.4933	29.4433	21.5567	31.0133	25.1167	28.7933	15.9667	19.3233	31.2633	47.1767	1.25667e-05	0.00310701	1	PF03048 UL92 family / PF12937 F-box-like	IPR004289 Herpesvirus UL92 / IPR001810 F-box domain, cyclin-like
AT1G63470	5.38667	6.23	2.87333	2.47333	6.86	8.15333	1.89333	1.96333	3.60667	3.46333	1.25895e-05	1	1	PF03479 Domain of unknown function (DUF296)	IPR005175 Domain of unknown function DUF296 / IPR017956 AT hook, DNA-binding motif
AT5G66630	1.79	2.65	0.176667	0.0833333	2.29333	1.81	1.83333	1.2	3.23333	11.8533	1.27307e-05	1	0.00639794	PF00412 LIM domain / PF05659 Arabidopsis broad-spectrum mildew resistance protein RPW8 / PF00931 NB-ARC domain / PF12315 Protein of unknown function (DUF3633)	IPR001781 Zinc finger, LIM-type / IPR008808 Powdery mildew resistance protein, RPW8 domain / IPR002182 NB-ARC / IPR022087 Protein of unknown function DUF3633 / IPR027417 P-loop containing nucleoside triphosphate hydrolase
AT2G19400	3.08	2.54333	0.363333	0.733333	0.27	0.51	2.76	2.96	1.64	2.04333	1.28425e-05	1	1	PF00069 Protein kinase domain / PF00069 Protein kinase domain / PF00433 Protein kinase C terminal domain / PF00433 Protein kinase C terminal domain	IPR000719 Protein kinase, catalytic domain / IPR017892 Protein kinase, C-terminal / IPR000961 AGC-kinase, C-terminal / IPR002290 Serine/threonine- / dual specificity protein kinase, catalytic domain / IPR020635 Tyrosine-protein kinase, catalytic domain / IPR017441 Protein kinase, ATP binding site / IPR008271 Serine/threonine-protein kinase, active site / IPR011009 Protein kinase-like domain
AT1G69730	15.7233	19.09	16.12	16.8933	10.02	11.4933	7.65667	4.01	22.7	47.25	1.28912e-05	1	0.836502	PF00069 Protein kinase domain / PF08488 Wall-associated kinase / PF13947 Wall-associated receptor kinase galacturonan-binding	IPR013695 Wall-associated kinase / IPR025287 Wall-associated receptor kinase galacturonan-binding domain / IPR000719 Protein kinase, catalytic domain / IPR011009 Protein kinase-like domain / IPR013320 Concanavalin A-like lectin/glucanase, subgroup / IPR002290 Serine/threonine- / dual specificity protein kinase, catalytic domain / IPR020635 Tyrosine-protein kinase, catalytic domain / IPR008271 Ser…
AT5G59650	1.19	1.46667	0	0.01	0	0	1.71667	1.15667	0.313333	0.456667	1.28927e-05	1	1	PF00069 Protein kinase domain / PF12819 Carbohydrate-binding protein of the ER / PF13855 Leucine rich repeat	IPR000719 Protein kinase, catalytic domain / IPR024788 Malectin-like carbohydrate-binding domain / IPR002290 Serine/threonine- / dual specificity protein kinase, catalytic domain / IPR020635 Tyrosine-protein kinase, catalytic domain / IPR013320 Concanavalin A-like lectin/glucanase, subgroup / IPR017441 Protein kinase, ATP binding site / IPR008271 Serine/threonine-protein kinase, active site / IPR…
AT1G33520	12.1933	20.5633	4.11	3.73	17.4433	21.0833	5.14	5.23667	21.83	26.63	1.29577e-05	1	1	PF00467 KOW motif / PF12656 DExH-box splicing factor binding site / PF12656 DExH-box splicing factor binding site	IPR005824 KOW / IPR026822 Protein MOS2 / IPR000467 G-patch domain
AT2G47010	1.25333	2.09	1.47667	1.16333	1.32333	1.53667	0.243333	0.29	3.82333	4.75667	1.3074e-05	1	1
AT3G26115	3.17	5.19667	1.2	1.13333	6.00333	4.35333	0.926667	1.21333	5.52	7.96333	1.31075e-05	1	1	PF00291 Pyridoxal-phosphate dependent enzyme / PF00291 Pyridoxal-phosphate dependent enzyme	IPR001926 Tryptophan synthase beta subunit-like PLP-dependent enzymes superfamily
AT5G25980	480.887	422.96	419.907	220.817	473.873	254.88	2.39333	1.06667	7.15667	1.75667	1.3198e-05	1	1	PF00232 Glycosyl hydrolase family 1	IPR001360 Glycoside hydrolase, family 1 / IPR013781 Glycoside hydrolase, catalytic domain / IPR018120 Glycoside hydrolase, family 1, active site / IPR017853 Glycoside hydrolase, superfamily
AT3G45030	129.59	54.0933	45.1867	22.1067	104.39	62.47	68.2967	35.0067	136.62	157.62	1.33646e-05	0.577136	1	PF00338 Ribosomal protein S10p/S20e	IPR001848 Ribosomal protein S10 / IPR005729 Ribosomal protein S10, eukaryotic/archaeal / IPR027486 Ribosomal protein S10 domain / IPR018268 Ribosomal protein S10, conserved site
AT1G78030	0.533333	1.51333	0.72	0.356667	0	0	0	0.04	0	0	1.34686e-05	1	0.245571
AT5G13750	4.66333	11.4767	6.50667	15.1967	4.80667	12.9833	6.21	9.25	9.61	28.5267	1.38142e-05	5.91784e-08	0.0351185	PF07690 Major Facilitator Superfamily / PF07690 Major Facilitator Superfamily	IPR011701 Major facilitator superfamily / IPR020846 Major facilitator superfamily domain / IPR001958 Tetracycline resistance protein, TetA/multidrug resistance protein MdtG / IPR016196 Major facilitator superfamily domain, general substrate transporter
AT1G08630	0.466667	2.28333	0.163333	7.00333	0.356667	5.62	0.483333	2.1	0.34	34.3067	1.38727e-05	9.61434e-06	1.2789e-05	PF01212 Beta-eliminating lyase	IPR001597 Aromatic amino acid beta-eliminating lyase/threonine aldolase / IPR015421 Pyridoxal phosphate-dependent transferase, major region, subdomain 1 / IPR015422 Pyridoxal phosphate-dependent transferase, major region, subdomain 2 / IPR015424 Pyridoxal phosphate-dependent transferase
AT1G65950	5.08333	7.95667	4.08	5.85667	2.31333	1.96333	1.81	2.12667	3.14	5.42	1.38733e-05	0.47965	1	PF03109 ABC1 family	IPR004147 UbiB domain / IPR011009 Protein kinase-like domain
AT2G22710	0.0266667	0.07	2.78667	5.11333	0.346667	0.356667	1.31667	1.14667	3.71667	8.64333	1.39419e-05	1	1
AT5G50530	12.9767	12	4.79667	4.04333	3.68667	3.47333	4.36667	4.88333	5.90667	5.14	1.43789e-05	1	1	PF00564 PB1 domain / PF00571 CBS domain pair / PF00571 CBS domain pair / PF00571 CBS domain pair / PF00571 CBS domain pair / PF00571 CBS domain pair / PF00571 CBS domain pair / PF00571 CBS domain pair	IPR000270 Phox/Bem1p / IPR000644 Cystathionine beta-synthase, core
AT4G21890	1.74667	1.81	2.89333	2.23	1.57333	1.44667	2.89	2.44333	4.83	7.09	1.44266e-05	1	1
AT1G24040	15.1967	18.52	5.77667	6.60333	16.39	17.69	18.2233	20.8467	8.71	9.15	1.47164e-05	1	1	PF00583 Acetyltransferase (GNAT) family	IPR000182 GNAT domain / IPR016181 Acyl-CoA N-acyltransferase
AT1G75730	3.77333	3.16	9.32667	10.7767	6.66	11.0933	8.52333	9.56333	5.08667	4.62667	1.5054e-05	1	1
AT1G29418	20.5267	13.77	10.9667	6.05	24.96	18.02	25.6633	15.9133	39.9833	93.14	1.50954e-05	1	0.0865467
AT5G01600	85.8667	186.393	71.16	225.85	150.897	357.787	77.7733	286.407	161.377	793.217	1.51563e-05	1.46343e-07	0.0019287	PF00210 Ferritin-like domain	IPR008331 Ferritin/DPS protein domain / IPR012347 Ferritin-related / IPR001519 Ferritin / IPR014034 Ferritin, conserved site / IPR009040 Ferritin- like diiron domain / IPR009078 Ferritin-like superfamily
AT5G18850	16.1467	20.2167	6.41667	14.56	6.74333	14.1633	2.09667	5.88	6.89667	21.52	1.52448e-05	1.20258e-05	1
AT1G74060	121.9	78.0633	83.3267	81.13	34.6267	21.56	107.63	88.8033	112.037	173.63	1.52884e-05	1	1	PF01159 Ribosomal protein L6e / PF03868 Ribosomal protein L6, N-terminal domain	IPR000915 Ribosomal protein L6E / IPR005568 Ribosomal protein L6, N-terminal / IPR014722 Ribosomal protein L2 domain 2
AT5G42890	25.89	42.91	14.7067	20.5	18.16	19.77	27.7833	46.07	13.0267	28.0933	1.54058e-05	0.000135922	1	PF02036 SCP-2 sterol transfer family / PF02036 SCP-2 sterol transfer family	IPR003033 SCP2 sterol-binding domain
AT5G21105	15.24	19.0867	18.4267	19.3433	24.2	27.5367	7.24667	7.86	6.67667	5.52667	1.54063e-05	1	1	PF00394 Multicopper oxidase / PF07732 Multicopper oxidase / PF07731 Multicopper oxidase	IPR001117 Multicopper oxidase, type 1 / IPR011707 Multicopper oxidase, type 3 / IPR011706 Multicopper oxidase, type 2 / IPR002355 Multicopper oxidase, copper-binding site / IPR008972 Cupredoxin / IPR017760 L-ascorbate oxidase, plants
AT1G44810	11.9367	22.7833	5.40667	12.8767	11.5867	18.32	0.233333	0.593333	12.9433	37.8067	1.58959e-05	0.001628	1	PF04504 Protein of unknown function, DUF573	IPR007592 Protein of unknown function DUF573
AT4G19490	10.3767	14.4067	11.7533	17.4133	17.15	17.24	4.42667	3.83333	3.81	4.56333	1.61525e-05	1	1	PF07928 Vps54-like protein / PF10475 Protein of unknown function N-terminal domain (DUF2450)	IPR012501 Vps54-like / IPR019515 Vacuolar protein sorting-associated protein 54
AT1G16010	16.8567	21.5533	26.2833	36.99	33.0267	39.2833	30.0267	31.94	25.93	43.4533	1.61736e-05	0.000198601	1	PF01544 CorA-like Mg2+ transporter protein	IPR002523 Mg2+ transporter protein, CorA-like/Zinc transport protein ZntB / IPR026573 Magnesium transporter MRS2/LPE10
AT5G67290	8.67333	9.67333	2.85667	3.45667	9.42333	10.75	9.59667	10.8667	3.55	5.21	1.64279e-05	1	1	PF01266 FAD dependent oxidoreductase	IPR006076 FAD dependent oxidoreductase
AT3G53230	1.91	4.26667	2.12667	7.67667	1.7	9.38	18.55	35.87	5.07333	23.7567	1.67335e-05	0.00358983	1	PF00004 ATPase family associated with various cellular activities (AAA) / PF00004 ATPase family associated with various cellular activities (AAA) / PF02359 Cell division protein 48 (CDC48), N-terminal domain / PF02933 Cell division protein 48 (CDC48), domain 2	IPR003338 CDC48, N-terminal subdomain / IPR004201 CDC48, domain 2 / IPR003959 ATPase, AAA-type, core / IPR005938 ATPase, AAA-type, CDC48 / IPR003960 ATPase, AAA-type, conserved site / IPR009010 Aspartate decarboxylase-like domain / IPR003593 AAA+ ATPase domain / IPR027417 P-loop containing nucleoside triphosphate hydrolase
AT1G66480	2.43667	3.11	0.52	1.11667	0.476667	0.376667	3.33	4.58	0.966667	1.96	1.67905e-05	1	1	PF14009 Domain of unknown function (DUF4228)	IPR025322 Protein of unknown function DUF4228
AT4G03530	0	0	0	0	0	0	1.92	6.06333	0	0.0433333	1.69208e-05	1	0.650368
AT1G71140	3.53667	3.95	8.06667	6.33667	0.726667	1.46667	7.65333	5.35333	7.60667	7.92667	1.70409e-05	1	1	PF01554 MatE / PF01554 MatE	IPR002528 Multi antimicrobial extrusion protein
AT2G22140	0.273333	0.136667	0.973333	1.13667	1.63	1.13	0.186667	0.276667	0.446667	0.276667	1.7266e-05	1	1	PF02732 ERCC4 domain / PF02732 ERCC4 domain	IPR006166 ERCC4 domain
AT2G29580	4.54	4.87333	1.34667	1.96333	2.69333	2.04333	5.28333	5.39	0.856667	1.46333	1.7434e-05	1	1	PF00076 RNA recognition motif. (a.k.a. RRM, RBD, or RNP domain)	IPR000504 RNA recognition motif domain / IPR000571 Zinc finger, CCCH-type / IPR012677 Nucleotide-binding, alpha-beta plait
AT1G65320	11.5067	13.1667	2.09667	2.07333	10.4667	15.0833	6.64333	6.85	6.78333	8.61	1.77472e-05	1	1	PF00571 CBS domain pair	IPR000644 Cystathionine beta-synthase, core
AT5G41920	4.11667	5.70333	1.76667	3.09667	1.81333	2.49667	5.19333	8.02667	1.68	2.97	1.78104e-05	0.194928	1	PF03514 GRAS domain family	IPR005202 Transcription factor GRAS
AT4G20130	18.3	12.5433	9.05333	4.42	28.1133	17.1767	30.8267	23.61	31.7867	16.83	1.79754e-05	0.00250264	1	PF09273 Rubisco LSMT substrate-binding / PF00856 SET domain	IPR015353 Rubisco LS methyltransferase, substrate-binding domain / IPR001214 SET domain
AT5G47815	0.0133333	0.00666667	2.08333	3.19	2.11667	2.13333	0.0266667	0	2.44333	2.39667	1.80227e-05	1	1
AT5G23410	6.02	10.2767	0.306667	0	5.19	6.62333	0.0366667	0.0333333	4.35667	10.3867	1.86125e-05	1	1
AT4G17600	161.257	103.937	63.39	39.92	150.707	86.53	69.2433	48.6967	188.877	88.6733	1.8642e-05	0.000122619	1	PF00504 Chlorophyll A-B binding protein	IPR022796 Chlorophyll A-B binding protein / IPR023329 Chlorophyll a/b binding protein domain
AT2G37200	20.6467	26.52	21.6333	55.43	23.8067	54.2567	9.22667	17.53	26.7533	66.8567	1.90788e-05	4.90061e-07	0.155628	PF04535 Domain of unknown function (DUF588)	IPR006702 Uncharacterised protein family UPF0497, trans-membrane plant
AT2G25350	2.04667	6.29333	0.413333	0.946667	0.533333	0.726667	2.53667	5.06	0.41	2.16667	1.91374e-05	0.00218841	1	PF00787 PX domain / PF00787 PX domain	IPR001683 Phox homologous domain
AT5G66010	9.15667	12.35	10.7267	18.5833	11.2567	13.1733	12.0833	12.3033	12.6267	29.2567	1.91824e-05	1.0994e-05	0.000658861	PF14259 RNA recognition motif (a.k.a. RRM, RBD, or RNP domain) / PF14259 RNA recognition motif (a.k.a. RRM, RBD, or RNP domain)	IPR012677 Nucleotide-binding, alpha-beta plait / IPR000504 RNA recognition motif domain
AT4G14440	31.74	36.4067	41.7633	44.4833	45.0533	43.1933	13.57	17.2367	10.44	23.0633	1.93415e-05	1	1	PF00378 Enoyl-CoA hydratase/isomerase family	IPR001753 Crotonase superfamily
AT5G16050	68.82	76.26	72.79	97.6233	70.96	91.6367	86.41	74.08	86.3733	162.607	1.98718e-05	0.000814251	0.00089526	PF00244 14-3-3 protein 1-69	IPR023410 14-3-3 domain / IPR000308 14-3-3 protein / IPR023409 14-3-3 protein, conserved site
AT1G72820	14.6467	12.44	7.14667	6.65333	4.68	4.17667	5.16	4.04333	6.69333	4.91333	2.0041e-05	1	1	PF00153 Mitochondrial carrier protein / PF00153 Mitochondrial carrier protein / PF00153 Mitochondrial carrier protein	IPR018108 Mitochondrial substrate/solute carrier / IPR002067 Mitochondrial carrier protein / IPR023395 Mitochondrial carrier domain
AT5G10760	37.4067	115.993	22.44	29.1067	171.697	90.0933	105.15	24.95	17.1	18.7833	2.01775e-05	1	0.0032048	PF00026 Eukaryotic aspartyl protease / PF14541 Xylanase inhibitor C-terminal / PF14543 Xylanase inhibitor N-terminal	IPR001461 Peptidase A1 / IPR021109 Aspartic peptidase
AT4G33470	23.1867	24.6533	16.3	13.9533	12.63	12.6133	29.13	29.25	15.68	15.4267	2.03852e-05	1	1	PF00850 Histone deacetylase domain / PF00850 Histone deacetylase domain	IPR023801 Histone deacetylase domain / IPR000286 Histone deacetylase superfamily
AT5G09810	186.377	241.067	135.92	151.877	282.77	319.057	232.67	254.353	194.49	394.047	2.07075e-05	0.00481289	0.11325	PF00022 Actin	IPR004000 Actin-related protein / IPR004001 Actin, conserved site / IPR020902 Actin/actin-like conserved site
AT4G25840	10.7767	12.0533	11.26	15.8067	11.38	13.5767	6.69	7.13333	6.13	8.20667	2.07869e-05	1	1	PF13419 Haloacid dehalogenase-like hydrolase	IPR023214 HAD-like domain / IPR006439 HAD-superfamily hydrolase, subfamily IA, variant 1
AT3G03855	1.44333	2.81667	0.21	0.306667	0.01	0	0.283333	0.06	0.43	0.396667	2.0908e-05	1	1
AT2G18915	7.93	8.94667	9.12	11.4333	13.0033	9.02333	4.47	4.01667	3.76333	4.37333	2.09365e-05	1	1	PF07646 Kelch motif 52-94 96-142 144-186 / PF12937 F-box-like / PF13418 Galactose oxidase, central domain / PF13418 Galactose oxidase, central domain / PF13418 Galactose oxidase, central domain / PF13418 Galactose oxidase, central domain / PF13426 PAS domain / PF13426 PAS domain	IPR011498 Kelch repeat type 2 / IPR000014 PAS domain / IPR001810 F-box domain, cyclin-like / IPR015915 Kelch-type beta propeller
AT4G28900	1.3	0.943333	0.01	0.00666667	0.00666667	0.0166667	2.82333	4.97333	0.00666667	0.02	2.09852e-05	1	1
AT2G18710	49.0333	42.7133	26.5233	18.3933	28.6033	20.68	59.73	57.5467	57.5133	31.5233	2.1453e-05	1	1	PF00344 eubacterial secY protein	IPR002208 SecY/SEC61-alpha family / IPR023201 SecY subunit domain / IPR026593 Protein translocase subunit SecY
AT1G63350	2.58667	4.06667	0.93	0.673333	7.85667	7.95333	0.0133333	0.0366667	2.95	5.11	2.16164e-05	1	1	PF00931 NB-ARC domain / PF13855 Leucine rich repeat / PF13855 Leucine rich repeat	IPR002182 NB-ARC / IPR000767 Disease resistance protein / IPR027417 P-loop containing nucleoside triphosphate hydrolase
AT2G11240	12.71	26.96	0.203333	0.0166667	0.0133333	0.01	0.0466667	0.0766667	0	0.04	2.17563e-05	1	1
AT3G24255	0.49	1.12667	3.87667	9.59	4.56667	8.74	3.42	6.14	2.28	9.93667	2.21319e-05	1.18556e-06	0.408008	PF13966 zinc-binding in reverse transcriptase	IPR026960 Reverse transcriptase zinc-binding domain
AT4G21740	23.21	22.3033	9.45	9.15333	17.8267	27.88	8.25333	9.67333	8.62333	13.2567	2.2238e-05	1	1
AT1G45231	3.34333	6.49667	1.95	4.32	5.55	7.55	5.65667	6.38333	6.80667	14.9	2.22518e-05	0.000883807	1	PF09445 RNA cap guanine-N2 methyltransferase / PF00397 WW domain	IPR019012 RNA cap guanine-N2 methyltransferase / IPR001202 WW domain
AT5G05870	7.85	10.5333	5.1	5.33667	9.16333	10.4367	13.4633	11.9067	4.64333	3.78667	2.23212e-05	1	1	PF00201 UDP-glucoronosyl and UDP-glucosyl transferase	IPR002213 UDP-glucuronosyl/UDP-glucosyltransferase
AT5G66470	26.76	17.6267	12.9333	7.73333	34.0633	20.51	35.3667	22.5233	40.1667	21.82	2.24233e-05	2.22565e-05	1	PF01926 GTPase of unknown function / PF07650 KH domain	IPR006073 GTP binding domain / IPR004044 K Homology domain, type 2 / IPR005662 GTP-binding protein Era / IPR005225 Small GTP-binding protein domain / IPR015946 K homology domain-like, alpha/beta / IPR027417 P-loop containing nucleoside triphosphate hydrolase
AT1G61190	24.6433	31.32	2.94	1.61333	2.68333	2.62667	1.53333	1.68667	5.89667	5.87667	2.2511e-05	1	1	PF00931 NB-ARC domain / PF13855 Leucine rich repeat	IPR002182 NB-ARC / IPR000767 Disease resistance protein / IPR027417 P-loop containing nucleoside triphosphate hydrolase
AT4G23300	15.3767	17.6033	15.71	18.23	14.34	15.8133	20.8067	17.4	1.66667	0.31	2.26556e-05	1	1	PF07714 Protein tyrosine kinase / PF01657 Salt stress response/antifungal / PF01657 Salt stress response/antifungal	IPR001245 Serine-threonine/tyrosine-protein kinase catalytic domain / IPR002902 Gnk2-homologous domain / IPR002290 Serine/threonine- / dual specificity protein kinase, catalytic domain / IPR020635 Tyrosine-protein kinase, catalytic domain / IPR013320 Concanavalin A-like lectin/glucanase, subgroup / IPR011009 Protein kinase-like domain / IPR017441 Protein kinase, ATP binding site / IPR008271 Serin…
AT3G16770	381.32	95.26	269.7	57.31	406.363	74.0033	222.18	49.91	23.64	16.0767	2.27751e-05	7.13599e-09	0.0113886	PF00847 AP2 domain	IPR001471 AP2/ERF domain / IPR016177 DNA-binding, integrase-type
AT5G57210	4.69	6.53333	3.96667	2.81667	4.15667	3.00333	6.90333	6.18333	6.58	8.42667	2.31588e-05	1	1	PF00566 TBC domain / PF00566 TBC domain	IPR000195 Rab-GTPase-TBC domain
AT3G47390	7.31333	8.50333	8.75	8.75	9.5	7.60333	1.86	1.31	9.00667	9.61	2.36193e-05	1	1	PF08719 Domain of unknown function (DUF1768) / PF00383 Cytidine and deoxycytidylate deaminase zinc-binding region / PF01872 RibD C-terminal domain	IPR002734 Bacterial bifunctional deaminase-reductase, C-terminal / IPR002125 CMP/dCMP deaminase, zinc-binding / IPR012816 Conserved hypothetical protein CHP02464 / IPR004794 Riboflavin biosynthesis protein RibD / IPR011549 Riboflavin-specific deaminase, C-terminal / IPR024072 Dihydrofolate reductase-like domain / IPR016193 Cytidine deaminase-like
AT2G14460	13.06	10.0067	0.406667	0	0	0	13.56	9.73	19.25	29.5267	2.39997e-05	1	1
AT5G52810	19.2833	19.7733	20.2933	18.5933	0.653333	0.703333	20.21	7.24667	1.16	1.63333	2.42238e-05	1	1	PF02423 Ornithine cyclodeaminase/mu-crystallin family	IPR003462 Ornithine cyclodeaminase/mu-crystallin / IPR023401 Ornithine cyclodeaminase, N-terminal / IPR016040 NAD(P)-binding domain
AT2G26750	2.42667	0.286667	0.816667	0.14	0.21	0.0733333	0	0	0.336667	0.0266667	2.45998e-05	0.000457729	0.00124581	PF12697 Alpha/beta hydrolase family	IPR000639 Epoxide hydrolase-like / IPR000073 Alpha/beta hydrolase fold-1
AT1G31220	5.73333	6.31333	1.85	1.89333	6.9	7.74667	5.27333	3.35667	2.17667	2.22667	2.47146e-05	1	1	PF00551 Formyl transferase	IPR002376 Formyl transferase, N-terminal / IPR001555 Phosphoribosylglycinamide formyltransferase, active site / IPR004607 Phosphoribosylglycinamide formyltransferase
AT3G27360	17.19	11.93	0.546667	0.113333	0.216667	0.163333	11.9033	8.79	0.4	0.133333	2.51119e-05	1	1	PF00125 Core histone H2A/H2B/H3/H4	IPR007125 Histone core / IPR000164 Histone H3 / IPR009072 Histone-fold
AT4G01915	8.80667	9.81667	0.146667	0.02	0	0.0466667	0	0	0	0.0233333	2.52043e-05	1	1
AT5G37310	10.6967	12.94	14.7133	16.9167	4.96667	5.65	4.79333	3.65333	14.8467	17.9967	2.55273e-05	1	1	PF02990 Endomembrane protein 70	IPR004240 Nonaspanin (TM9SF)
AT1G67365	1.82667	10.65	2.39333	13.5967	3.19333	10.1633	2.12667	9.07333	5.3	35.7833	2.55335e-05	3.91531e-08	0.0013352
AT1G14340	13.21	16.1767	3.77333	6.56667	9.48333	19.9133	14.8333	20.2433	3.89333	9.54333	2.56169e-05	0.00797233	1	PF14259 RNA recognition motif (a.k.a. RRM, RBD, or RNP domain) / PF00076 RNA recognition motif. (a.k.a. RRM, RBD, or RNP domain)	IPR000504 RNA recognition motif domain / IPR001395 Aldo/keto reductase / IPR012677 Nucleotide-binding, alpha-beta plait
AT1G60710	55.8933	53.88	19.6033	27.91	33.24	40.3	9.88	9.26	24.97	28.64	2.56783e-05	1	1	PF00248 Aldo/keto reductase family	IPR023210 NADP-dependent oxidoreductase domain / IPR020471 Aldo/keto reductase subgroup / IPR001395 Aldo/keto reductase
AT3G51600	314.96	290.983	252.533	370.64	247.353	393.85	59.9567	160.147	223.717	550.027	2.583e-05	0.000152978	0.0989501	PF00234 Protease inhibitor/seed storage/LTP family	IPR016140 Bifunctional inhibitor/plant lipid transfer protein/seed storage helical domain / IPR000528 Plant lipid transfer protein/Par allergen
AT1G61990	5.06333	4.26667	6.84667	4.88333	2.99	2.61	9.25	6.35667	1.59333	1.56667	2.60135e-05	1	1	PF02536 mTERF	IPR003690 Mitochodrial transcription termination factor-related
AT5G40630	0.693333	0.58	5.74333	1.76333	2.18333	1.84	3.15667	2.46333	1.16333	0.613333	2.60339e-05	0.0571707	0.0804796	PF00240 Ubiquitin family / PF00240 Ubiquitin family	IPR000626 Ubiquitin / IPR019955 Ubiquitin supergroup
AT1G14250	4.5	1.38333	17.94	7.79667	25.9733	12.4	4.44333	1.22667	0.223333	0.173333	2.61138e-05	0.434762	1	PF01150 GDA1/CD39 (nucleoside phosphatase) family	IPR000407 Nucleoside phosphatase GDA1/CD39
AT5G01470	8.92	8.11	4.56	3.44667	7.55667	6.58	4.16	4.14667	11.87	11.5067	2.61513e-05	1	1	PF10294 Putative methyltransferase	IPR019410 Nicotinamide N-methyltransferase-like
AT1G62830	2.94667	4.37333	2.45667	3.23333	4.91667	4.78333	1.97667	1.68333	5.23333	6.24	2.62386e-05	1	1	PF01593 Flavin containing amine oxidoreductase / PF04433 SWIRM domain	IPR002937 Amine oxidase / IPR007526 SWIRM domain / IPR011991 Winged helix-turn-helix DNA-binding domain / IPR009057 Homeodomain-like
AT1G02870	14.9667	9.66	15.48	16.3667	18.1833	14.9	9.52667	5.03333	21.74	33.7733	2.63049e-05	1	1	PF09420 Ribosome biogenesis protein Nop16	IPR019002 Ribosome biogenesis protein Nop16
AT2G45490	0.723333	0.483333	0.69	0.34	0.683333	0.476667	0.616667	0.416667	5.82667	11.4833	2.63176e-05	1	1	PF00069 Protein kinase domain	IPR000719 Protein kinase, catalytic domain / IPR002290 Serine/threonine- / dual specificity protein kinase, catalytic domain / IPR020635 Tyrosine-protein kinase, catalytic domain / IPR011009 Protein kinase-like domain / IPR017441 Protein kinase, ATP binding site / IPR008271 Serine/threonine-protein kinase, active site
AT3G43740	21.9467	26.6967	5.94333	9.5	7.35	8.07333	0.0233333	0.0466667	9.80667	19.41	2.63888e-05	1	1	PF00560 Leucine Rich Repeat 17-38 40-61 / PF08263 Leucine rich repeat N-terminal domain / PF12799 Leucine Rich repeats (2 copies)	IPR013210 Leucine-rich repeat-containing N-terminal, type 2 / IPR001611 Leucine-rich repeat / IPR025875 Leucine rich repeat 4
AT5G28350	7.59333	11.1633	0.3	0.643333	0.42	0.496667	0.363333	0.476667	0.496667	0.633333	2.63897e-05	1	1	PF07064 RIC1	IPR009771 Ribosome control protein 1 / IPR015943 WD40/YVTN repeat-like-containing domain / IPR017986 WD40-repeat-containing domain / IPR001680 WD40 repeat
AT2G18410	3.97667	6.26667	0.623333	0.68	0.53	1.02	3.16333	3.18333	1.00667	1.63	2.64145e-05	1	1	PF10483 Elongator subunit Iki1 / PF10483 Elongator subunit Iki1	IPR019519 Histone acetylation protein 2
AT5G45775	96.8	58.1067	107.19	70.3967	103.46	70.9933	48.64	33.0367	109.61	147.603	2.7113e-05	1	1	PF00281 Ribosomal protein L5 / PF00673 ribosomal L5P family C-terminus	IPR002132 Ribosomal protein L5 / IPR020929 Ribosomal protein L5, conserved site / IPR022803 Ribosomal protein L5 domain
AT5G39710	4.36	4.20667	3.88333	2.36333	2.33	2.54667	2.16	1.96667	12.2467	14.5	2.73663e-05	1	1	PF01535 PPR repeat 10-34 52-76 94-118 / PF12854 PPR repeat / PF12854 PPR repeat / PF12854 PPR repeat / PF12854 PPR repeat / PF12854 PPR repeat / PF12854 PPR repeat / PF13041 PPR repeat family / PF13041 PPR repeat family / PF13041 PPR repeat family / PF13041 PPR repeat family / PF13041 PPR repeat family / PF13041 PPR repeat family / PF13041 PPR repeat family	IPR002885 Pentatricopeptide repeat / IPR011990 Tetratricopeptide-like helical
AT3G43955	3.12333	3.39	0.0466667	0.0133333	3.24	3.33333	0.00333333	0	3.69333	3.45	2.74107e-05	1	1
AT4G15270	0.0566667	0.153333	0.17	0.443333	0.166667	0.243333	0.2	0.0566667	0.0866667	2.37	2.75044e-05	0.00205998	1.03937e-05		IPR002213 UDP-glucuronosyl/UDP-glucosyltransferase
AT5G25757	29.43	20.68	14.3567	10.08	16.0967	11.32	14.03	8.65	2.64333	1.20667	2.76543e-05	1	1	PF10255 RNA polymerase I-associated factor PAF67	IPR019382 Translation initiation factor 3 complex subunit L
AT5G45350	149.967	189.53	113.733	183.66	120.34	187.957	9.00667	16.37	100.483	148.517	2.84463e-05	0.538542	1
AT5G22620	35.2333	35.3333	36.4567	32.8967	8.73333	7.04333	38.0167	39.8833	47.22	36.8667	2.84639e-05	1	1	PF00300 Phosphoglycerate mutase family	IPR013078 Histidine phosphatase superfamily, clade-1 / IPR001345 Phosphoglycerate/bisphosphoglycerate mutase, active site
AT1G44960	7.33333	8.77333	7.73333	12.22	5.86667	7.67	1.74	1.31333	8.39333	20.2667	2.85608e-05	0.13388	1	PF09335 SNARE associated Golgi protein	IPR015414 SNARE associated Golgi protein
AT4G37110	6.49	5.03667	7.97667	6.15	3.8	3.05	9.33	8.17	2.61667	3.08	2.86401e-05	1	1	PF10497 Zinc-finger domain of monoamine-oxidase A repressor R1	IPR018866 Zinc-finger domain of monoamine-oxidase A repressor R1 / IPR001841 Zinc finger, RING-type
AT4G02390	0.976667	0.95	3.44	3.6	4.67667	4.25667	4.07667	3.99333	4.14333	3.81333	2.86551e-05	1	1	PF02037 SAP domain 76-110 117-151 187-221 / PF02037 SAP domain 76-110 117-151 187-221 / PF02877 Poly(ADP-ribose) polymerase, regulatory domain / PF00644 Poly(ADP-ribose) polymerase catalytic domain / PF05406 WGR domain	IPR003034 SAP domain / IPR004102 Poly(ADP-ribose) polymerase, regulatory domain / IPR012317 Poly(ADP-ribose) polymerase, catalytic domain / IPR008893 WGR domain
AT4G19190	7.59	12.6833	7.83667	13.9367	12.2267	12.8033	9.26333	11.24	1.75	2.23	2.87888e-05	1	1	PF10197 N-terminal domain of CBF1 interacting co-repressor CIR / PF15288 Zinc knuckle	IPR019339 CBF1-interacting co-repressor CIR, N-terminal domain
AT1G09995	2.87333	2.85333	0.06	0.0366667	0	0	0.91	0.873333	0	0	2.89161e-05	1	1
AT5G22570	1.12667	3.02	1.63	10.2933	0.4	0.0866667	1.14333	0.213333	2.98333	4.48667	2.93412e-05	0.0284867	0.00103899	PF03106 WRKY DNA -binding domain	IPR003657 DNA-binding WRKY
AT1G05350	12.09	11.95	4.39667	4.65667	7.12667	4.60667	5.2	4.34	12.7733	18.5	2.94308e-05	1	1	PF00899 ThiF family	IPR000594 UBA/THIF-type NAD/FAD binding fold / IPR009036 Molybdenum cofactor biosynthesis, MoeB / IPR016040 NAD(P)-binding domain / IPR006140 D-isomer specific 2-hydroxyacid dehydrogenase, NAD-binding
AT5G44580	270.047	248.92	43.1567	55.5767	12.9033	43.25	59.79	56.9167	55.6167	175.04	2.98175e-05	1	1
AT3G66658	6.65	8.37667	4.97333	6.19667	4.27	5.18333	5.09333	5.5	7.63333	12.54	3.04597e-05	0.108096	1	PF00171 Aldehyde dehydrogenase family	IPR015590 Aldehyde dehydrogenase domain / IPR016160 Aldehyde dehydrogenase, conserved site / IPR016162 Aldehyde dehydrogenase, N-terminal / IPR016163 Aldehyde dehydrogenase, C-terminal / IPR016161 Aldehyde/histidinol dehydrogenase
AT1G65230	102.47	70.96	58.65	42.11	20.1267	20.34	112.31	80.31	32.8667	18.6867	3.09485e-05	1	1	PF10184 Uncharacterized conserved protein (DUF2358)	IPR018790 Protein of unknown function DUF2358
AT1G13950	12.8967	10.9933	5.53667	5.22333	9.61667	7.35667	3.7	2.62667	8.99	20.8667	3.10054e-05	1	0.0691254	PF00467 KOW motif / PF01287 Eukaryotic initiation factor 5A hypusine, DNA-binding OB fold	IPR005824 KOW / IPR020189 Translation elongation factor, IF5A C-terminal / IPR001884 Translation elongation factor IF5A / IPR012340 Nucleic acid-binding, OB-fold / IPR008991 Translation protein SH3-like domain / IPR014722 Ribosomal protein L2 domain 2 / IPR019769 Translation elongation factor, IF5A, hypusine site
AT4G12917	12.7167	10.7533	15.7167	12.1267	0	0.16	6.99333	5.65667	0.123333	0.303333	3.12594e-05	1	1
AT5G38690	3.27333	3.73667	0.926667	0.766667	1.26333	0.59	1.17	1.02333	1.36333	1.25333	3.1349e-05	1	1	PF10497 Zinc-finger domain of monoamine-oxidase A repressor R1	IPR018866 Zinc-finger domain of monoamine-oxidase A repressor R1 / IPR018500 DDT domain, subgroup / IPR018501 DDT domain superfamily
AT3G02920	4.36333	4.06667	2.76333	2.08	3.94667	2.84333	0.58	0.48	3.92667	5.60667	3.21819e-05	1	1	PF08784 Replication protein A C terminal / PF01336 OB-fold nucleic acid binding domain	IPR004365 Nucleic acid binding, OB-fold, tRNA/helicase-type / IPR014892 Replication protein A, C-terminal / IPR012340 Nucleic acid-binding, OB-fold / IPR011991 Winged helix-turn-helix DNA-binding domain / IPR014646 Replication protein A, subunit RPA32
AT1G07210	13.94	17.2333	11.5767	14.2867	14.1833	17.2767	18.4867	17.0567	18.96	35.3767	3.26999e-05	0.0608721	0.0930003	PF01084 Ribosomal protein S18	IPR001648 Ribosomal protein S18
AT5G20450	1.45	1.63667	0	0	1.51	1.48333	0	0	0.0233333	0.0266667	3.2768e-05	1	1		IPR002710 Dilute
AT5G23420	12.6133	12.7267	4.18333	2.22	10.0767	4.94667	3.90333	2.71333	5.22667	3.37333	3.3013e-05	1	1	PF00505 HMG (high mobility group) box 78-152	IPR009071 High mobility group (HMG) box domain
AT1G61180	4.72333	8.72333	1.25	1.00667	0.83	0.84	0.413333	0.346667	0.34	0.323333	3.33125e-05	1	1	PF00931 NB-ARC domain / PF13855 Leucine rich repeat	IPR002182 NB-ARC / IPR000767 Disease resistance protein / IPR027417 P-loop containing nucleoside triphosphate hydrolase
AT4G14890	175.68	108.397	185.067	110.533	163.243	110.093	162.183	109.123	49.6867	24.13	3.33364e-05	0.000810529	1	PF00111 2Fe-2S iron-sulfur cluster binding domain	IPR001041 2Fe-2S ferredoxin-type domain / IPR012675 Beta-grasp domain / IPR010241 Ferredoxin [2Fe-2S], plant
AT3G44480	24.5167	39.82	6.46	5.79667	3.41333	7.54333	17.1767	16.8467	1.83333	2.53667	3.34547e-05	1	1	PF07725 Leucine Rich Repeat / PF00931 NB-ARC domain / PF01582 TIR domain / PF00560 Leucine Rich Repeat 17-38 40-61 / PF00560 Leucine Rich Repeat 17-38 40-61 / PF00560 Leucine Rich Repeat 17-38 40-61 / PF13504 Leucine rich repeat	IPR011713 Leucine-rich repeat 3 / IPR002182 NB-ARC / IPR000157 Toll/interleukin-1 receptor homology (TIR) domain / IPR001611 Leucine-rich repeat / IPR000767 Disease resistance protein / IPR003593 AAA+ ATPase domain / IPR027417 P-loop containing nucleoside triphosphate hydrolase
AT4G37930	1405.99	1428.09	887.38	690.64	739.233	614.747	1729.47	1424.25	973.467	579.28	3.34585e-05	1	1	PF00464 Serine hydroxymethyltransferase	IPR001085 Serine hydroxymethyltransferase / IPR015421 Pyridoxal phosphate-dependent transferase, major region, subdomain 1 / IPR015422 Pyridoxal phosphate-dependent transferase, major region, subdomain 2 / IPR019798 Serine hydroxymethyltransferase, pyridoxal phosphate binding site / IPR015424 Pyridoxal phosphate-dependent transferase
AT3G49340	0.816667	4.36	0.31	0.476667	0.4	0.05	0.643333	0.583333	0.32	0.5	3.4414e-05	0.977699	0.00113358	PF00112 Papain family cysteine protease / PF08246 Cathepsin propeptide inhibitor domain (I29) / PF00112 Papain family cysteine protease	IPR000668 Peptidase C1A, papain C-terminal / IPR013201 Proteinase inhibitor I29, cathepsin propeptide / IPR000169 Cysteine peptidase, cysteine active site / IPR025660 Cysteine peptidase, histidine active site / IPR025661 Cysteine peptidase, asparagine active site / IPR013128 Peptidase C1A, papain
AT1G35170	0	0.133333	2.32	1.56667	0.196667	0.103333	0.04	0.13	0	0.0933333	3.49329e-05	1	1	PF03798 TLC domain / PF03798 TLC domain	IPR006634 TRAM/LAG1/CLN8 homology domain
AT1G61620	22.31	25.6367	15.0133	22.5067	17.9233	19.25	11.9567	13.1267	19.71	32.04	3.49393e-05	0.0132186	1	PF04641 Protein of unknown function, DUF602 / PF13923 Zinc finger, C3HC4 type (RING finger)	IPR016818 Nitric oxide synthase-interacting / IPR013083 Zinc finger, RING/FYVE/PHD-type / IPR027799 Replication termination factor 2, RING-finger / IPR001841 Zinc finger, RING-type / IPR017907 Zinc finger, RING-type, conserved site
AT1G22090	0	0	0	0.0266667	0	0	2.17667	0.953333	0	0	3.53408e-05	1	1	PF04776 Protein of unknown function (DUF626)	IPR006462 Protein of unknown function DUF626, Arabidopsis thaliana
AT5G18900	12.7133	18.4167	13.3633	29.2133	13.5433	23.37	13.6267	17.2533	13.63	45.1767	3.54046e-05	6.05792e-09	5.79443e-05	PF03171 2OG-Fe(II) oxygenase superfamily / PF01549 ShK domain-like	IPR005123 Oxoglutarate/iron-dependent dioxygenase / IPR003582 Metridin-like ShK toxin / IPR006620 Prolyl 4-hydroxylase, alpha subunit
AT1G30835	6.54333	6.77333	1.90333	1.4	1.42333	1.26667	2.08	1.83	1.28667	1.87	3.54181e-05	1	1
AT1G67780	0.0833333	0.163333	0.1	0.276667	0.146667	0.0566667	1.10333	0.95	0.193333	0.186667	3.54743e-05	1	1	PF10497 Zinc-finger domain of monoamine-oxidase A repressor R1	IPR018866 Zinc-finger domain of monoamine-oxidase A repressor R1 / IPR018501 DDT domain superfamily / IPR018500 DDT domain, subgroup
AT4G04426	0	0.0633333	2.27	2.53333	2.4	1.99667	0.01	0.02	2.29667	2.81	3.55332e-05	1	1
AT3G09190	1.54667	2.59333	2.33	4.53	1.63333	2.89333	2.20667	3.20333	3.13667	10.77	3.57852e-05	0.000150087	0.0122078	PF00139 Legume lectin domain	IPR001220 Legume lectin domain / IPR008985 Concanavalin A-like lectin/glucanases superfamily / IPR013320 Concanavalin A-like lectin/glucanase, subgroup
AT3G43833	0	0	0	0	1.5	0.646667	0	0	0	0	3.58532e-05	1	1
AT1G69850	16.5567	23.3067	17.2433	16.7067	36.9533	45.9467	32.36	24.1867	15.01	15.25	3.59073e-05	1	1	PF00854 POT family	IPR000109 Proton-dependent oligopeptide transporter family / IPR016196 Major facilitator superfamily domain, general substrate transporter
AT4G08240	13.75	11.2033	14.8867	17.2933	10.6167	12.5033	3.09	3.37333	12.11	17.4367	3.60578e-05	1	1
AT1G59660	1.62667	2.93333	1.02667	1.33333	3.18667	3.23667	0	0	2.39333	2.31667	3.62211e-05	1	1	PF04096 Nucleoporin autopeptidase	IPR007230 Peptidase S59, nucleoporin
AT5G45620	20.5467	24.27	20.3033	21.4033	26.74	23.3333	12.5433	11.5133	25.0433	27.6233	3.63206e-05	1	1
AT5G49650	19.2	31.2933	18.32	28.5633	22.3267	28.92	5.32667	9.98	6.65667	8.68667	3.63979e-05	0.448288	1	PF00370 FGGY family of carbohydrate kinases, N-terminal domain / PF02782 FGGY family of carbohydrate kinases, C-terminal domain	IPR018484 Carbohydrate kinase, FGGY, N-terminal / IPR018485 Carbohydrate kinase, FGGY, C-terminal
AT5G48412	37.5167	64.0533	0.476667	0.0366667	0.05	0.143333	0.0933333	0.09	0	0.166667	3.6482e-05	1	1
AT5G23690	3.1	3.6	2.75333	3.26	2.40333	2.72	4.64	4.00667	4.7	11.1233	3.65099e-05	1	0.0389587	PF01743 Poly A polymerase head domain / PF12627 Probable RNA and SrmB- binding site of polymerase A	IPR002646 Poly A polymerase, head domain
AT1G47210	5.83333	5.24667	4.22667	2.61667	4.48333	3.16667	4.22333	3.37	12.9133	8.00667	3.69559e-05	1	1	PF00134 Cyclin, N-terminal domain	IPR006671 Cyclin, N-terminal / IPR013763 Cyclin-like / IPR014400 Cyclin A/B/D/E
AT4G39710	98.0033	85.0933	57.8	42.7533	44.1733	36.48	110.013	80.09	54.6033	28.8567	3.76481e-05	1	1	PF00254 FKBP-type peptidyl-prolyl cis-trans isomerase	IPR001179 Peptidyl-prolyl cis-trans isomerase, FKBP-type, domain / IPR023566 Peptidyl-prolyl cis-trans isomerase, FKBP-type
AT4G16710	11.0767	23.6267	1.34333	2.52333	1.13667	1.6	10.0367	25.0167	1.56667	5.35667	3.77075e-05	0.272981	1	PF04101 Glycosyltransferase family 28 C-terminal domain	IPR007235 Glycosyl transferase, family 28, C-terminal
AT5G43470	30.8333	52.4033	8.10667	10.0533	4.19333	4.28667	2.75	2.50333	6.08667	6.72333	3.78084e-05	1	1	PF00931 NB-ARC domain	IPR002182 NB-ARC / IPR000767 Disease resistance protein / IPR027417 P-loop containing nucleoside triphosphate hydrolase
AT5G36240	0	0	0	0.0766667	0.973333	1.98	1.79333	2.30333	1.49	2.41667	3.79725e-05	1	1	PF00098 Zinc knuckle	IPR001878 Zinc finger, CCHC-type
AT4G23430	20.05	26.6133	25.4667	38.5333	28.8033	39.25	34.38	42.73	31.57	42.3033	3.79843e-05	2.96236e-06	1	PF00106 short chain dehydrogenase	IPR002198 Short-chain dehydrogenase/reductase SDR / IPR016040 NAD(P)-binding domain / IPR002347 Glucose/ribitol dehydrogenase
AT2G25270	3.05333	2.73	1.06	0.74	0.783333	0.506667	3.01	3.11333	0.693333	0.88	3.80783e-05	1	1
AT3G03520	4.41667	10.3833	2.53	7.03667	2.38	7.55667	3.13	7.06667	8.02667	18.9667	3.81705e-05	3.07598e-06	1	PF04185 Phosphoesterase family	IPR007312 Phosphoesterase
AT3G47050	0.0166667	0.0433333	0.426667	1.07667	0.133333	0.0833333	0.0233333	0.0233333	1.62	3.62667	3.85511e-05	1	1	PF00933 Glycosyl hydrolase family 3 N terminal domain / PF01915 Glycosyl hydrolase family 3 C terminal domain	IPR001764 Glycoside hydrolase, family 3, N-terminal / IPR002772 Glycoside hydrolase family 3 C-terminal domain / IPR017853 Glycoside hydrolase, superfamily / IPR026892 Glycoside hydrolase family 3
AT2G20530	24.09	19.1967	25.26	23.2833	33.45	27.5367	38.3333	27.1667	35.0667	49.4467	3.86393e-05	1	0.154998	PF01145 SPFH domain / Band 7 family	IPR001107 Band 7 protein / IPR000163 Prohibitin
AT5G33270	0	0.0333333	0.65	1.25	0.0566667	0.1	0	0	0	0	3.88176e-05	1	1
AT5G52430	6.35	8.63333	1.80333	1.58	1.76333	1.70667	1.85333	2.88333	1.49667	2.58	3.88912e-05	1	1
AT1G61150	23.55	33.9033	10.55	15.6467	24.8133	27.5833	21.6267	22.2133	27.4733	45.67	3.89266e-05	0.0987694	1	PF10607 Ran binding protein in the microtubule-organising centre / PF08513 LisH	IPR024964 CTLH/CRA C-terminal to LisH motif domain / IPR013720 LisH dimerisation motif, subgroup / IPR006594 LisH dimerisation motif / IPR006595 CTLH, C-terminal LisH motif / IPR013144 CRA domain
AT2G43210	9.76	18.0033	20.17	39.3867	28.33	34.12	11.1333	17.7933	12.19	27.29	3.9019e-05	0.000121973	1	PF00789 UBX domain	IPR001012 UBX
AT1G22800	5.98	8.12667	4.39	4.17667	3.66	4.36333	7.18333	7.99333	10.1233	13.5433	3.91646e-05	1	1	PF08241 Methyltransferase domain	IPR013216 Methyltransferase type 11
AT5G63580	3.63	3.73667	4.30667	8.16333	0.126667	0.66	0.05	0.13	2.67333	6.84333	3.95035e-05	1	1	PF03171 2OG-Fe(II) oxygenase superfamily / PF14226 non-haem dioxygenase in morphine synthesis N-terminal / PF14226 non-haem dioxygenase in morphine synthesis N-terminal	IPR005123 Oxoglutarate/iron-dependent dioxygenase / IPR027443 Isopenicillin N synthase-like / IPR026992 Non-haem dioxygenase N-terminal domain
AT5G47250	1.3	2.04	2.92333	2.96667	3.02333	1.89667	4.58	3.53	9.43	5.40667	3.95398e-05	1	1	PF00931 NB-ARC domain / PF13855 Leucine rich repeat	IPR002182 NB-ARC / IPR001611 Leucine-rich repeat / IPR000767 Disease resistance protein / IPR027417 P-loop containing nucleoside triphosphate hydrolase
AT3G44630	23.8967	28.4633	7.56667	6.45	3.92333	9.46667	11.4733	10.1133	0.796667	1.57333	4.003e-05	1	1	PF00560 Leucine Rich Repeat 17-38 40-61 / PF00560 Leucine Rich Repeat 17-38 40-61 / PF00931 NB-ARC domain / PF01582 TIR domain / PF07725 Leucine Rich Repeat	IPR011713 Leucine-rich repeat 3 / IPR002182 NB-ARC / IPR000157 Toll/interleukin-1 receptor homology (TIR) domain / IPR001611 Leucine-rich repeat / IPR000767 Disease resistance protein / IPR003593 AAA+ ATPase domain / IPR027417 P-loop containing nucleoside triphosphate hydrolase
AT3G47290	21.0133	16.21	21.5267	14.23	18.8967	15	0.1	0	23.9033	23.9833	4.00506e-05	1	1	PF00387 Phosphatidylinositol-specific phospholipase C, Y domain / PF00168 C2 domain / PF00388 Phosphatidylinositol-specific phospholipase C, X domain / PF00387 Phosphatidylinositol-specific phospholipase C, Y domain	IPR001711 Phospholipase C, phosphatidylinositol-specific, Y domain / IPR000008 C2 calcium-dependent membrane targeting / IPR000909 Phospholipase C, phosphatidylinositol-specific , X domain / IPR001192 Phosphoinositide phospholipase C / IPR017946 PLC-like phosphodiesterase, TIM beta/alpha-barrel domain / IPR008973 C2 calcium/lipid-binding domain, CaLB / IPR018029 C2 membrane targeting protein
AT2G12490	0.876667	2.07	0.00666667	0	0.00666667	0	0	0.00666667	0.00666667	0.0266667	4.03224e-05	1	1
AT1G64270	1.39667	2.24	1.6	4.37667	0.0333333	0	2.25	3.24	2.1	5.85667	4.07874e-05	0.00217677	1
AT5G51620	19.3933	24.31	11.29	10.0333	5.00667	3.65333	0.0966667	0.0566667	19.3867	31.3833	4.10757e-05	1	1	PF03665 Uncharacterised protein family (UPF0172)	IPR005366 Uncharacterised protein family UPF0172
AT5G28030	9.82667	13.4	25.51	14.2533	24.8933	11.2733	57.2033	29.6867	48.1333	24.9833	4.14379e-05	0.00411824	1	PF00291 Pyridoxal-phosphate dependent enzyme	IPR001926 Tryptophan synthase beta subunit-like PLP-dependent enzymes superfamily / IPR001216 Cysteine synthase/cystathionine beta-synthase P-phosphate-binding site / IPR005856 Cysteine synthase K/M / IPR005859 Cysteine synthase A
AT3G27850	333.48	177.567	358.9	189.247	371.19	203.413	383.987	250.24	207.827	79.0933	4.24537e-05	9.92557e-09	1	PF00542 Ribosomal protein L7/L12 C-terminal domain	IPR013823 Ribosomal protein L7/L12, C-terminal / IPR000206 Ribosomal protein L7/L12 / IPR014719 Ribosomal protein L7/L12, C-terminal/adaptor protein ClpS-like / IPR008932 Ribosomal protein L7/L12, oligomerisation / IPR015608 Ribosomal protein L7/L12, chloroplast
AT4G13660	0.103333	0.23	0.03	0.02	0	0	0.44	0.29	1.17333	0.893333	4.26109e-05	1	1	PF05368 NmrA-like family	IPR008030 NmrA-like / IPR016040 NAD(P)-binding domain
AT1G67792	2.36	2.93333	0.156667	0.526667	0.31	0.266667	0.32	0.203333	2.61667	2.46667	4.27281e-05	1	1
AT1G33930	1.39667	0.623333	0	0	1.72333	0.723333	0	0	0	0	4.31147e-05	1	1	PF04548 AIG1 family	IPR006703 AIG1 / IPR027417 P-loop containing nucleoside triphosphate hydrolase
AT1G67550	6.27	12.2367	7.16333	11.91	12.74	14.1167	2.59	3.12667	4.35667	7.52333	4.44391e-05	0.301604	1	PF00699 Urease beta subunit / PF01979 Amidohydrolase family / PF00449 Urease alpha-subunit, N-terminal domain / PF00547 Urease, gamma subunit	IPR002019 Urease, beta subunit / IPR006680 Amidohydrolase 1 / IPR011612 Urease alpha-subunit, N-terminal / IPR002026 Urease, gamma/gamma-beta subunit / IPR017950 Urease, alpha subunit, conserved site / IPR008221 Urease / IPR011059 Metal-dependent hydrolase, composite domain / IPR005848 Urease, alpha subunit / IPR017951 Urease, alpha subunit, C-terminal
AT1G59124	0.843333	1.39667	2.06667	2.50333	1.79	1.62	1.04	0.86	4.28	4.19	4.4616e-05	1	1	PF00931 NB-ARC domain	IPR002182 NB-ARC / IPR000767 Disease resistance protein / IPR027417 P-loop containing nucleoside triphosphate hydrolase
AT3G46658	0.94	1.41333	0.0433333	0.0133333	0.75	0.73	0.843333	1.16333	0.0166667	0	4.46931e-05	1	1
AT3G43210	1.27667	1.71667	1.61333	3.31333	2.43667	2.93667	2.25	2.20333	4.11333	7.3	4.46993e-05	1	1	PF11995 Domain of unknown function (DUF3490) / PF00225 Kinesin motor domain	IPR001752 Kinesin, motor domain / IPR021881 Protein of unknown function DUF3490 / IPR019821 Kinesin, motor region, conserved site / IPR027640 Kinesin-like protein / IPR027417 P-loop containing nucleoside triphosphate hydrolase
AT1G63420	6.42667	17.7133	6.25	12.72	10.2767	40.88	10.8967	34	6.09667	16.9933	4.47704e-05	1.07711e-08	0.021779	PF05686 Glycosyl transferase family 90	IPR006598 Lipopolysaccharide-modifying protein / IPR008539 Protein of unknown function DUF821, CAP10-like
AT3G56690	2.76	4.01333	1.22333	1.55667	1.51333	1.72	1.57	0.996667	3.97	7.04667	4.49452e-05	1	1	PF00004 ATPase family associated with various cellular activities (AAA) / PF00004 ATPase family associated with various cellular activities (AAA)	IPR003959 ATPase, AAA-type, core / IPR027417 P-loop containing nucleoside triphosphate hydrolase / IPR003960 ATPase, AAA-type, conserved site / IPR003593 AAA+ ATPase domain
AT2G17695	60.32	67.84	26.34	38.38	21.37	34.01	77.5467	95.7133	22.38	25.4767	4.55569e-05	1	1	PF09348 Domain of unknown function (DUF1990)	IPR018960 Domain of unknown function DUF1990
AT5G04740	35.3367	50.69	22.7	33.7533	42.65	56.41	37.6	60.1033	21.3667	28.77	4.62371e-05	0.000650991	1	PF01842 ACT domain 697-761	IPR002912 ACT domain
AT1G78670	21.51	49.5967	26.56	70.0867	5.87667	26.41	2.54333	18.3567	34.6333	66.0533	4.64754e-05	1.39474e-05	1	PF07722 Peptidase C26	IPR011697 Peptidase C26 / IPR015527 Peptidase C26, gamma-glutamyl hydrolase
AT3G14595	54.7733	73.5167	30.5467	61.9267	14.36	30.5233	47.4033	122.563	14.2433	28.36	4.76451e-05	0.00185978	1		IPR021138 Ribosomal protein L18a
AT5G43160	1.57333	2.1	0.0366667	0.05	0.323333	0.566667	0.22	0.2	0.263333	0.423333	4.77597e-05	1	1	PF04484 Family of unknown function (DUF566)	IPR007573 Protein of unknown function DUF566
AT4G31790	7.83	4.93333	7.7	5.18	7.26667	4.62667	10.13	3.48333	15.1	24.4333	4.80313e-05	1	1	PF00590 Tetrapyrrole (Corrin/Porphyrin) Methylases	IPR000878 Tetrapyrrole methylase / IPR004551 Diphthine synthase / IPR014777 Tetrapyrrole methylase, subdomain 1 / IPR014776 Tetrapyrrole methylase, subdomain 2
AT4G01593	10.3333	14.4167	5.75333	7.28333	5.35	6.99	0	0	6.03333	11.5533	4.80995e-05	1	1
AT2G47470	53.29	83.6633	60.4867	97.2933	63.43	82.67	52.7033	62.26	57.1533	169.957	4.8233e-05	1.61012e-07	8.57543e-05	PF00085 Thioredoxin / PF00085 Thioredoxin	IPR013766 Thioredoxin domain / IPR012336 Thioredoxin-like fold / IPR005788 Disulphide isomerase / IPR017937 Thioredoxin, conserved site / IPR005746 Thioredoxin
AT2G04340	10.6467	14.0833	1.09	2.31667	1.74	1.11	7.98667	8.86	6.86667	15.2733	4.82958e-05	1	1
AT4G06598	3.65	3.83667	7.62667	8.39	7.06333	7.74	8.97333	10.0967	8.95333	9.65	4.85274e-05	1	1
AT2G13130	1.04667	2.69	0	0	0	0	0	0	0	0	4.85883e-05	1	1
AT3G23560	2.78333	5.53	4.88333	12.63	4.40667	5.08	3.24333	3.94	9.57667	20.3833	4.87059e-05	0.0276575	1	PF01554 MatE / PF01554 MatE	IPR002528 Multi antimicrobial extrusion protein
AT5G45730	0.113333	0.306667	1.15	2.39667	1.15	2.38333	0.173333	0.09	0.9	2.9	4.88067e-05	0.0100516	1	PF03107 C1 domain / PF03107 C1 domain / PF07649 C1-like domain / PF07649 C1-like domain / PF07649 C1-like domain / PF07649 C1-like domain	IPR004146 DC1 / IPR011424 C1-like / IPR001965 Zinc finger, PHD-type / IPR019786 Zinc finger, PHD-type, conserved site
AT5G40770	34.0067	24.0067	32.13	22.5133	39.72	26.0867	17.5667	8.87333	41.8567	45.6233	4.89845e-05	1	1	PF01145 SPFH domain / Band 7 family	IPR001107 Band 7 protein / IPR000163 Prohibitin
AT5G48350	0	0	1.53	2.58667	2.27	1.66333	0.03	0.0566667	2.16333	3.50333	4.97301e-05	1	1	PF01612 3'-5' exonuclease	IPR002562 3'-5' exonuclease domain / IPR012337 Ribonuclease H-like domain
AT1G60505	3.38	5.01	0.07	0	0	0	2.75333	2.5	2.37667	4.52667	4.98857e-05	1	1
AT4G15096	0	0.02	0	0.1	2.28	1.32667	0.99	0.963333	0.273333	0.343333	5.08407e-05	1	1
AT1G59700	26.3367	25.9	3.84667	7.01333	3.87	9.25333	3.54333	8.80667	27.53	49.2933	5.09538e-05	1	1	PF13417 Glutathione S-transferase, N-terminal domain / PF00043 Glutathione S-transferase, C-terminal domain	IPR004046 Glutathione S-transferase, C-terminal / IPR012336 Thioredoxin-like fold / IPR010987 Glutathione S-transferase, C-terminal-like / IPR004045 Glutathione S-transferase, N-terminal / IPR017933 Glutathione S-transferase/chloride channel, C-terminal
AT5G55180	4.26667	2.89333	4.07667	1.34333	13.23	5.15333	3.82	2.03	2.71333	1.73	5.12564e-05	0.00754868	1	PF00332 Glycosyl hydrolases family 17 / PF07983 X8 domain	IPR000490 Glycoside hydrolase, family 17 / IPR012946 X8 / IPR013781 Glycoside hydrolase, catalytic domain / IPR017853 Glycoside hydrolase, superfamily
AT5G43070	8.58333	5.09	0.786667	0.303333	0.22	0.44	0.533333	0.146667	0.463333	0.336667	5.13788e-05	1	1	PF13943 WPP domain	IPR025265 WPP domain
AT5G48660	4.86667	7.41667	1.04333	1.60667	1.57333	1.21667	4.01333	3.67333	1.75	2.30667	5.14333e-05	1	1	PF05529 B-cell receptor-associated protein 31-like	IPR008417 B-cell receptor-associated 31-like
AT4G18020	16.4367	26.4667	10.1833	16.97	9.87	15.3167	8.92333	16.2867	14.9867	23.83	5.18174e-05	6.15204e-07	1	PF00072 Response regulator receiver domain / PF00249 Myb-like DNA-binding domain	IPR001789 Signal transduction response regulator, receiver domain / IPR001005 SANT/Myb domain / IPR009057 Homeodomain-like / IPR011006 CheY-like superfamily / IPR006447 Myb domain, plants / IPR017930 Myb domain
AT4G19120	20.76	35.6667	12.6	10.24	63.9167	26.5333	4.07	4.25667	5.43667	4.57333	5.2201e-05	1	0.727421	PF03141 Putative methyltransferase	IPR004159 Putative S-adenosyl-L-methionine-dependent methyltransferase
AT5G28773	0	0	0.563333	0.0966667	1.92333	0.573333	3.07333	0.69	0.25	0.0966667	5.23921e-05	0.00439786	0.136189
AT1G29240	2.74667	6.04	4.90667	10.4733	2.52	2.58667	2.54333	2.3	2.54333	5.40333	5.33459e-05	0.00424545	0.447868	PF05097 Protein of unknown function (DUF688)	IPR007789 Protein of unknown function DUF688
AT4G35190	0.0333333	1.03333	0.17	1.06333	0.0366667	0.666667	0.233333	0.69	0.253333	5.34333	5.35632e-05	1.15705e-05	0.000149204	PF03641 Possible lysine decarboxylase	IPR005269 Cytokinin riboside 5'-monophosphate phosphoribohydrolase LOG
AT4G13980	6.05	8.35	3.24333	4.43667	3.23667	2.43667	4.57	5.58	8.09333	13.2767	5.44317e-05	1	1	PF00447 HSF-type DNA-binding	IPR000232 Heat shock factor (HSF)-type, DNA-binding / IPR027709 Heat shock transcription factor, plant / IPR027725 Heat shock transcription factor family / IPR011991 Winged helix-turn-helix DNA-binding domain
AT1G64720	747.23	561.68	227.477	200.683	298.123	263.28	269.633	243.613	804.773	339.813	5.4442e-05	0.92223	1		IPR023393 START-like domain / IPR002913 START domain
AT1G60260	11.9567	17.0033	4.55	7.62667	18.8133	14.94	14.5233	16.78	21.8767	29.2433	5.5227e-05	1	1	PF00232 Glycosyl hydrolase family 1 / PF00232 Glycosyl hydrolase family 1	IPR001360 Glycoside hydrolase, family 1 / IPR013781 Glycoside hydrolase, catalytic domain / IPR017853 Glycoside hydrolase, superfamily / IPR018120 Glycoside hydrolase, family 1, active site
AT1G70480	14.0733	13.75	4.88	4.32	8.43	6.06333	17.4233	17.3033	6.66667	7.49333	5.57622e-05	1	1	PF02713 Domain of unknown function DUF220	IPR003863 Protein of unknown function DUF220
AT3G14620	20.7467	39.86	36.0867	84.4967	61.7067	121.453	47.6933	61.0167	117.303	95.4967	5.62497e-05	0.410778	1	PF00067 Cytochrome P450	IPR001128 Cytochrome P450 / IPR017972 Cytochrome P450, conserved site / IPR002401 Cytochrome P450, E-class, group I
AT5G55896	5.80667	9.27667	0.1	0.196667	0.16	0.18	0.01	0.04	0.11	0.366667	5.62746e-05	1	1
AT1G56500	42.4267	40.7	51.3133	35.4367	12.2933	8.17	63.9267	40.56	55.8667	30.87	5.81466e-05	0.109626	1	PF01436 NHL repeat 403-430 459-486 515-542 573-600 629-656 / PF01436 NHL repeat 403-430 459-486 515-542 573-600 629-656 / PF01436 NHL repeat 403-430 459-486 515-542 573-600 629-656 / PF13905 Thioredoxin-like / PF13419 Haloacid dehalogenase-like hydrolase	IPR001258 NHL repeat / IPR023214 HAD-like domain / IPR012336 Thioredoxin-like fold / IPR011042 Six-bladed beta-propeller, TolB-like / IPR006439 HAD-superfamily hydrolase, subfamily IA, variant 1 / IPR000033 LDLR class B repeat
AT5G39190	6.53667	4.85	0.88	0.896667	0.463333	0.223333	0.843333	0.19	0	0.0533333	5.85772e-05	1	1	PF00190 Cupin	IPR006045 Cupin 1 / IPR014710 RmlC-like jelly roll fold / IPR019780 Germin, manganese binding site / IPR011051 RmlC-like cupin domain / IPR001929 Germin
AT1G67000	0.86	2.72	0.173333	1.41	4.34667	4.76667	2.13667	1.82667	0.63	5.36667	5.86854e-05	0.00305813	0.0343732	PF07714 Protein tyrosine kinase / PF14380 Wall-associated receptor kinase C-terminal / PF14380 Wall-associated receptor kinase C-terminal	IPR001245 Serine-threonine/tyrosine-protein kinase catalytic domain / IPR013320 Concanavalin A-like lectin/glucanase, subgroup / IPR011009 Protein kinase-like domain / IPR002290 Serine/threonine- / dual specificity protein kinase, catalytic domain / IPR020635 Tyrosine-protein kinase, catalytic domain / IPR000719 Protein kinase, catalytic domain / IPR017441 Protein kinase, ATP binding site / IPR00…
AT5G44500	3.94333	3.07	2.64333	3.75	2.98	3.87	0.26	0.256667	4.08333	5.00667	5.87901e-05	1	1	PF01423 LSM domain / PF01423 LSM domain	IPR001163 Ribonucleoprotein LSM domain / IPR006649 Ribonucleoprotein LSM domain, eukaryotic/archaea-type / IPR017131 Small ribonucleoprotein associated, SmB/SmN / IPR010920 Like-Sm (LSM) domain
AT5G28050	70.67	60.87	39.3233	29.7633	19.8767	21	30.82	27.5733	37.21	38.1333	5.93487e-05	1	1	PF00383 Cytidine and deoxycytidylate deaminase zinc-binding region	IPR002125 CMP/dCMP deaminase, zinc-binding / IPR016193 Cytidine deaminase-like / IPR016192 APOBEC/CMP deaminase, zinc-binding
AT3G15820	15.7067	12.9333	16.0333	19.25	18.61	25.5867	11.5267	12.49	18.8867	28.2233	5.97374e-05	1	1	PF14378 PAP2 superfamily
AT3G60810	21.1167	28.7267	8.80333	11.6967	10.01	10.4867	9.82667	12.98	11.32	15.71	6.11118e-05	1	1	PF07386 Protein of unknown function (DUF1499)	IPR010865 Protein of unknown function DUF1499
AT4G03500	2.14667	2.47667	3.74	4.59333	0	0	1.83333	2.01333	3.33667	4.27667	6.18182e-05	1	1	PF00023 Ankyrin repeat 160-187 257-278 / PF00023 Ankyrin repeat 160-187 257-278 / PF00023 Ankyrin repeat 160-187 257-278 / PF00023 Ankyrin repeat 160-187 257-278 / PF12796 Ankyrin repeats (3 copies) / PF12796 Ankyrin repeats (3 copies) / PF12796 Ankyrin repeats (3 copies) / PF13962 Domain of unknown function	IPR002110 Ankyrin repeat / IPR020683 Ankyrin repeat-containing domain / IPR026961 PGG domain
AT2G23790	11	23.24	9.58	18.71	8.53667	14.3767	9.59	12.1033	10.9367	53.4367	6.25581e-05	5.02292e-06	0.000274369	PF04678 Protein of unknown function, DUF607	IPR006769 Coiled-coil domain containing protein 109, C-terminal
AT2G44990	0	0.0466667	0	0.09	0	0.896667	0.0666667	0.193333	0	0.0633333	6.27005e-05	0.000133477	4.70074e-05	PF03055 Retinal pigment epithelial membrane protein / PF03055 Retinal pigment epithelial membrane protein	IPR004294 Carotenoid oxygenase
AT5G43270	15.6667	17.4833	11.3233	19.2633	2.21667	4.96667	0.98	2.88333	1.76	4.63333	6.35839e-05	1	1	PF03110 SBP domain	IPR004333 Transcription factor, SBP-box
AT1G24370	0	0	0	0.0666667	0.143333	0.29	0	0	0.363333	2.14	6.52284e-05	0.914298	0.0169147
AT5G35930	2.57333	3.07667	0.423333	0.706667	3.10667	3.54667	3.38333	2.89	0.53	1.08667	6.77236e-05	1	1	PF00501 AMP-binding enzyme / PF00501 AMP-binding enzyme / PF00550 Phosphopantetheine attachment site 737-806 / PF00550 Phosphopantetheine attachment site 737-806 / PF13193 AMP-binding enzyme C-terminal domain / PF13360 PQQ-like domain / PF13360 PQQ-like domain / PF13570 PQQ-like domain	IPR000873 AMP-dependent synthetase/ligase / IPR009081 Acyl carrier protein-like / IPR020845 AMP-binding, conserved site / IPR006162 Phosphopantetheine attachment site / IPR027295 Quinonprotein alcohol dehydrogenase-like domain / IPR025110 Domain of unknown function DUF4009 / IPR018391 Pyrrolo-quinoline quinone beta-propeller repeat / IPR011047 Quinonprotein alcohol dehydrogenase-like superfamily
AT1G65420	5.73333	6.13	4.47333	4.43333	8.53	6.77333	9.25333	7.67333	0.973333	1.46333	6.79494e-05	1	1	PF04483 Protein of unknown function (DUF565)	IPR007572 Uncharacterised protein family Ycf20
AT3G18500	22.94	29.6667	17.8367	26.6867	20.9767	26.39	9.82333	13.2033	9.22667	10.2267	6.85869e-05	1	1	PF03372 Endonuclease/Exonuclease/phosphatase family / PF03372 Endonuclease/Exonuclease/phosphatase family	IPR005135 Endonuclease/exonuclease/phosphatase
AT3G61010	6.45	11.9667	0.0433333	0.03	0.0166667	0.0166667	10.3633	11.2333	0	0.0133333	6.90378e-05	1	1	PF00210 Ferritin-like domain	IPR008331 Ferritin/DPS protein domain / IPR012347 Ferritin-related / IPR001519 Ferritin / IPR009078 Ferritin-like superfamily / IPR009040 Ferritin- like diiron domain
AT3G18485	0.59	0.556667	0.313333	0.393333	0.76	0.556667	5.06333	2.90667	7.81333	6.51333	7.21601e-05	1	1
AT1G48520	27.2833	19.6533	30.3767	15.0933	32.17	17.8567	10.9933	6.76333	30.91	16.7167	7.22988e-05	5.11517e-06	1	PF02637 GatB domain / PF02934 PET112 family, N terminal region	IPR018027 Asn/Gln amidotransferase / IPR006075 Aspartyl/Glutamyl-tRNA(Gln) amidotransferase, subunit B/E, catalytic / IPR003789 Aspartyl/glutamyl-tRNA amidotransferase subunit B-related / IPR004413 Aspartyl/glutamyl-tRNA(Asn/Gln) amidotransferase, B subunit / IPR017959 Aspartyl/glutamyl-tRNA(Asn/Gln) amidotransferase, subunit B /E / IPR017958 Glutamyl-tRNA(Gln) amidotransferase, subunit B, conser…
AT1G14840	11.83	11.71	4.77667	4.46333	3.92667	2.75333	14.29	13.4733	15.03	18.3933	7.31093e-05	1	1	PF07058 Myosin II heavy chain-like	IPR009768 Myosin II heavy chain-like
AT4G19510	10.5633	17.78	12.3533	25.0767	8.46333	18.22	0.0833333	0.06	37.84	47.22	7.32638e-05	1	1	PF00931 NB-ARC domain / PF01582 TIR domain / PF07725 Leucine Rich Repeat / PF13855 Leucine rich repeat	IPR011713 Leucine-rich repeat 3 / IPR002182 NB-ARC / IPR000157 Toll/interleukin-1 receptor homology (TIR) domain / IPR001611 Leucine-rich repeat / IPR027417 P-loop containing nucleoside triphosphate hydrolase / IPR000767 Disease resistance protein
AT1G71260	17.0333	11.0933	10.1867	11.1	9.81667	10.9567	18.8767	11.79	20.56	25.0767	7.32997e-05	1	1	PF08536 Whirly transcription factor	IPR013742 Plant transcription factor / IPR009044 ssDNA-binding transcriptional regulator
AT5G20200	11.9767	10.32	11.7833	11.8233	5.07667	5.05667	4.30333	3.66333	4.86333	4.19	7.33062e-05	1	1
AT2G31130	4.08	7.82	4.61	10.4267	4.42	8.23	5.91333	9.09333	6.89	19.3667	7.39619e-05	1.89878e-07	0.0600719
AT2G23010	0.466667	0.943333	4.04667	4.25333	0.76	1.70333	1.35	2.11333	1.79667	3.13667	7.43398e-05	1	1	PF00450 Serine carboxypeptidase	IPR001563 Peptidase S10, serine carboxypeptidase
AT3G44610	6.68667	7.35	0.736667	1.07	0.213333	1.15667	0.613333	1.19	0.456667	0.61	7.43605e-05	1	1	PF00069 Protein kinase domain / PF00069 Protein kinase domain	IPR000719 Protein kinase, catalytic domain / IPR008271 Serine/threonine-protein kinase, active site / IPR011009 Protein kinase-like domain / IPR002290 Serine/threonine- / dual specificity protein kinase, catalytic domain / IPR020635 Tyrosine-protein kinase, catalytic domain
AT4G26555	33.0767	16.91	5.72333	3.46333	6.19	4.27	5.72667	5.53667	31.0433	13.63	7.54322e-05	0.902819	1	PF00254 FKBP-type peptidyl-prolyl cis-trans isomerase	IPR001179 Peptidyl-prolyl cis-trans isomerase, FKBP-type, domain / IPR023566 Peptidyl-prolyl cis-trans isomerase, FKBP-type
AT4G31540	3.86333	6.61667	4.61333	6.49333	4.82667	6.17333	1.98	1.79	1.59333	2.06333	7.6907e-05	1	1	PF03081 Exo70 exocyst complex subunit	IPR004140 Exocyst complex protein Exo70 / IPR016159 Cullin repeat-like-containing domain
AT1G09140	25.7867	35.2933	24.6167	59.5067	25.4167	52.1967	21.7533	37.1333	34.5367	94.3367	7.70638e-05	1.02158e-07	0.0298427	PF00076 RNA recognition motif. (a.k.a. RRM, RBD, or RNP domain) / PF00076 RNA recognition motif. (a.k.a. RRM, RBD, or RNP domain)	IPR000504 RNA recognition motif domain / IPR012677 Nucleotide-binding, alpha-beta plait
AT5G39790	4.16333	3.16333	7.89	7.32	9.20333	7.83	0.633333	0.773333	6.56667	5.00333	7.71608e-05	1	1
AT1G12620	1.53	1.65667	0.87	0.726667	0.786667	0.656667	0.213333	0.193333	0.71	0.79	7.72431e-05	1	1	PF01535 PPR repeat 10-34 52-76 94-118 / PF01535 PPR repeat 10-34 52-76 94-118 / PF12854 PPR repeat / PF12854 PPR repeat / PF12854 PPR repeat / PF12854 PPR repeat / PF13041 PPR repeat family / PF13041 PPR repeat family / PF13041 PPR repeat family / PF13041 PPR repeat family	IPR002885 Pentatricopeptide repeat / IPR011990 Tetratricopeptide-like helical
AT3G45390	0.37	0.333333	1.59667	2.97667	1.50333	1.89667	0.206667	0.25	0.356667	1.05333	7.77846e-05	1	1	PF07714 Protein tyrosine kinase / PF00069 Protein kinase domain / PF00139 Legume lectin domain / PF00069 Protein kinase domain / PF07714 Protein tyrosine kinase	IPR001245 Serine-threonine/tyrosine-protein kinase catalytic domain / IPR000719 Protein kinase, catalytic domain / IPR001220 Legume lectin domain / IPR017441 Protein kinase, ATP binding site / IPR002290 Serine/threonine- / dual specificity protein kinase, catalytic domain / IPR020635 Tyrosine-protein kinase, catalytic domain / IPR013320 Concanavalin A-like lectin/glucanase, subgroup / IPR008985 C…
AT3G60960	2.85667	2.39333	0.113333	0	0	0	0	0.08	0	0	7.80962e-05	1	1	PF01535 PPR repeat 10-34 52-76 94-118 / PF01535 PPR repeat 10-34 52-76 94-118 / PF01535 PPR repeat 10-34 52-76 94-118 / PF01535 PPR repeat 10-34 52-76 94-118 / PF01535 PPR repeat 10-34 52-76 94-118 / PF13812 Pentatricopeptide repeat domain / PF13812 Pentatricopeptide repeat domain	IPR002885 Pentatricopeptide repeat / IPR011990 Tetratricopeptide-like helical
AT1G07890	285.673	320.787	349.94	341.72	322.177	427.553	285.033	384.64	503.16	706	7.93455e-05	1	1	PF00141 Peroxidase 66-392	IPR002016 Haem peroxidase, plant/fungal/bacterial / IPR019793 Peroxidases heam-ligand binding site / IPR019794 Peroxidase, active site / IPR010255 Haem peroxidase / IPR002207 Plant ascorbate peroxidase
AT4G01520	0	0	0.616667	4.17	0.65	2.92667	0.456667	0.696667	0.91	14.7367	7.9859e-05	0.000464761	0.000372752	PF02365 No apical meristem (NAM) protein	IPR003441 No apical meristem (NAM) protein
AT1G51390	8.79333	14.23	4.92333	7.87667	2.20333	2.94	9.34	11.9567	5.43333	12.8933	8.02969e-05	0.00866533	1	PF08712 Scaffold protein Nfu/NifU N terminal / PF01106 NifU-like domain	IPR014824 NIF system FeS cluster assembly, NifU-like scaffold, N-terminal / IPR001075 NIF system FeS cluster assembly, NifU, C-terminal / IPR017065 HIRA-interacting protein 5
AT5G43740	6.05	9.42	0.513333	0.68	0.58	0.873333	2.92667	3.21667	1.76333	2.43	8.17033e-05	1	1	PF00931 NB-ARC domain	IPR002182 NB-ARC / IPR000767 Disease resistance protein / IPR027417 P-loop containing nucleoside triphosphate hydrolase
AT3G15260	28.0467	37.2333	23.8967	36.6667	28.1833	37.6267	36.43	42.4867	33.9	98.7767	8.17582e-05	0.000151629	0.00177335	PF00481 Protein phosphatase 2C 8-151	IPR001932 Protein phosphatase 2C (PP2C)-like / IPR015655 Protein phosphatase 2C
AT5G63030	51.8233	77.3633	13.81	32.9633	36.7933	98.75	47.5033	89.7933	18.1567	51.63	8.19915e-05	3.05119e-06	1	PF00462 Glutaredoxin	IPR002109 Glutaredoxin / IPR014025 Glutaredoxin subgroup / IPR011899 Glutaredoxin, eukaryotic/virial / IPR012336 Thioredoxin-like fold
AT5G45780	0.826667	1.73667	1.19333	1.92	2.29333	2.03	1.44667	1.05	2.01	3.27667	8.24458e-05	1	0.240671	PF08263 Leucine rich repeat N-terminal domain / PF07714 Protein tyrosine kinase / PF13516 Leucine Rich repeat / PF13855 Leucine rich repeat	IPR013210 Leucine-rich repeat-containing N-terminal, type 2 / IPR001245 Serine-threonine/tyrosine-protein kinase catalytic domain / IPR008271 Serine/threonine-protein kinase, active site / IPR013320 Concanavalin A-like lectin/glucanase, subgroup / IPR011009 Protein kinase-like domain / IPR000719 Protein kinase, catalytic domain / IPR017441 Protein kinase, ATP binding site
AT5G26110	9.41333	7.21333	4.83	6.54667	5.38333	4.28333	9.76667	7.84333	13.88	20.75	8.31366e-05	1	1	PF00069 Protein kinase domain / PF00069 Protein kinase domain	IPR000719 Protein kinase, catalytic domain / IPR022495 Kae1-associated kinase Bud32 / IPR011009 Protein kinase-like domain / IPR002290 Serine/threonine- / dual specificity protein kinase, catalytic domain
AT1G74120	2.28	3.08667	1.69333	2.36333	1.81667	2.63333	0.29	0.3	0.14	0.383333	8.33511e-05	1	1	PF02536 mTERF / PF02536 mTERF	IPR003690 Mitochodrial transcription termination factor-related
AT4G01320	24.5733	33.1167	14.44	17.15	19.88	20.35	32.8667	35.4733	14.1767	26.4933	8.45751e-05	1	1	PF01435 Peptidase family M48	IPR001915 Peptidase M48 / IPR027057 CAAX prenyl protease 1
AT1G63670	5.80667	9.34333	2.92667	2.61667	8.82	7.24	2.31	2.37	7.12667	13.9933	8.46466e-05	1	1	PF14309 Domain of unknown function (DUF4378) / PF12552 Protein of unknown function (DUF3741)	IPR025486 Domain of unknown function DUF4378 / IPR022212 Protein of unknown function DUF3741
AT4G00270	10.8033	20.6367	4.83333	16.4067	5.88667	12.34	4.02333	5.85	6.52667	28.0833	8.4942e-05	1.51799e-07	0.0161832	PF04504 Protein of unknown function, DUF573	IPR007592 Protein of unknown function DUF573
AT5G39160	2.82	1.19667	0.43	0.283333	0.32	0.103333	0.223333	0.05	0.0433333	0	8.56794e-05	1	1	PF00190 Cupin	IPR006045 Cupin 1 / IPR001929 Germin / IPR014710 RmlC-like jelly roll fold / IPR011051 RmlC-like cupin domain / IPR019780 Germin, manganese binding site
AT2G45030	9.87	10.7733	11.4	11.1967	14.5067	12.6233	14.5333	9.03	18.57	30.5933	8.5745e-05	1	0.758317	PF00679 Elongation factor G C-terminus / PF00009 Elongation factor Tu GTP binding domain / PF03144 Elongation factor Tu domain 2 / PF03764 Elongation factor G, domain IV / PF14492 Elongation Factor G, domain II	IPR000795 Elongation factor, GTP-binding domain / IPR004161 Translation elongation factor EFTu/EF1A, domain 2 / IPR000640 Translation elongation factor EFG, V domain / IPR005517 Translation elongation factor EFG/EF2, domain IV / IPR009022 Elongation factor G, III-V domain / IPR004540 Translation elongation factor EFG/EF2 / IPR020568 Ribosomal protein S5 domain 2-type fold / IPR009000 Translation …
AT1G71430	8.36333	5.42667	2.90667	1.97	2.65667	1.2	7.61333	4.49	8.64	12.9867	8.58434e-05	1	1
AT1G65190	38.6433	37.12	0.406667	0	0	0	0.03	0.0433333	0	0.03	8.64075e-05	1	1	PF07714 Protein tyrosine kinase / PF00069 Protein kinase domain	IPR001245 Serine-threonine/tyrosine-protein kinase catalytic domain / IPR011009 Protein kinase-like domain / IPR000719 Protein kinase, catalytic domain
AT3G47010	5.55	5.63333	8.16667	8.23	0.326667	0.163333	5.77333	2.3	7.14	15.9533	8.65139e-05	1	1	PF00933 Glycosyl hydrolase family 3 N terminal domain / PF01915 Glycosyl hydrolase family 3 C terminal domain	IPR001764 Glycoside hydrolase, family 3, N-terminal / IPR002772 Glycoside hydrolase family 3 C-terminal domain / IPR017853 Glycoside hydrolase, superfamily / IPR019800 Glycoside hydrolase, family 3, active site / IPR026892 Glycoside hydrolase family 3
AT3G16170	5.47667	7.49333	9.98667	17.53	8.60667	15.5433	7.38667	12.26	10.94	23.5167	8.74642e-05	5.13964e-06	1	PF00501 AMP-binding enzyme / PF00501 AMP-binding enzyme / PF13193 AMP-binding enzyme C-terminal domain	IPR000873 AMP-dependent synthetase/ligase / IPR020459 AMP-binding / IPR025110 Domain of unknown function DUF4009 / IPR020845 AMP-binding, conserved site
AT4G29080	22.1267	27.9767	24.2367	29.2833	19.7467	20.12	17.4967	21.87	24.7967	55.2233	8.91618e-05	0.00442767	0.0176499	PF02309 AUX/IAA family	IPR003311 AUX/IAA protein / IPR011525 Aux/IAA-ARF-dimerisation
AT1G35115	7.06	14.7667	0.09	0	0.0333333	0.00666667	1.40667	1.18667	8.05333	13.3833	8.97053e-05	1	1
AT3G44490	0.0433333	0	0	0	0	0	1.65333	0.92	1.76333	2.25667	9.06677e-05	1	1		IPR023801 Histone deacetylase domain / IPR000286 Histone deacetylase superfamily
AT4G01897	21.1167	36.36	2.73667	4.24333	1.65333	3.99667	6.66	13.15	4.59	9.87333	9.22884e-05	1	1	PF06108 Protein of unknown function (DUF952)	IPR009297 Protein of unknown function DUF952
AT1G29600	1.58	3.03333	0	0	0	0	0	0	0	0.0733333	9.24956e-05	1	1	PF00642 Zinc finger C-x8-C-x5-C-x3-H type (and similar) 67-92	IPR000571 Zinc finger, CCCH-type
AT5G03420	15.08	19.8667	15.6233	18.81	16.9433	19.0767	5.99	6.20667	19.3467	23.9633	9.33338e-05	1	1
AT3G07800	6.01	6.03	1.43333	1.87667	1.90667	1.33667	1.9	1.42333	1.99667	2.85	9.34545e-05	1	1	PF00265 Thymidine kinase	IPR001267 Thymidine kinase / IPR027417 P-loop containing nucleoside triphosphate hydrolase / IPR020633 Thymidine kinase, conserved site
AT5G27960	0	0	0	0	0	0	0.48	1.24	0	0	9.51362e-05	1	1	PF00319 SRF-type transcription factor (DNA-binding and dimerisation domain)	IPR002100 Transcription factor, MADS-box
AT2G29240	0	0.01	0	0	0.406667	0.84	0	0	0.06	0	9.66267e-05	1	1
AT3G62620	3.04667	3.27	2.40333	2.85667	3.65333	2.38667	3.80667	3.30667	6.24333	6.31333	9.70235e-05	1	1
AT1G29800	6.28667	10.1667	2.45	4.76333	3.45667	4.83667	3.66667	5.08333	3.39333	8.26667	9.74806e-05	4.49506e-05	1	PF01363 FYVE zinc finger / PF04366 Family of unknown function (DUF500)	IPR007461 Ysc84 actin-binding domain / IPR000306 Zinc finger, FYVE-type / IPR013083 Zinc finger, RING/FYVE/PHD-type / IPR011011 Zinc finger, FYVE/PHD-type / IPR017455 Zinc finger, FYVE-related
AT1G52270	1.16	1.49667	0.0633333	0	0	0	0	0	0.863333	1.58333	9.84068e-05	1	1
AT3G47675	9.45	7	0.2	0.08	0	0	0.06	0.566667	0.0966667	0.11	9.86184e-05	1	1	PF14389 Leucine-zipper of ternary complex factor MIP1	IPR025757 Ternary complex factor MIP1, leucine-zipper
AT5G03740	26.1667	18.2233	27.1133	22.41	26.2033	23.88	29.6967	25.4567	32.5033	50.2667	9.90242e-05	1	0.0604859		IPR007087 Zinc finger, C2H2
AT4G08980	24.94	38.8133	24.84	44.52	25.1567	41.2967	24.5867	32.4133	28.22	77.09	9.94348e-05	3.10247e-08	0.00177374	PF12937 F-box-like
AT2G07215	0	0	6.45	2.68667	0.15	0.0333333	0.426667	0.06	0.406667	0.123333	0.000100034	1	1
AT3G27420	4.25	7.82	1.11333	2.74667	1.97333	1.82667	0.726667	1.39667	0.07	0.31	0.000100077	1	1		IPR027353 NET domain
AT1G65070	8.39	7.81	4.13333	3.54667	7.96	9.03667	3.86	3.3	11.3533	13.86	0.000101023	1	1	PF00488 MutS domain V	IPR000432 DNA mismatch repair protein MutS, C-terminal / IPR005747 DNA mismatch repair protein MutS, type 2 / IPR007696 DNA mismatch repair protein MutS, core / IPR027417 P-loop containing nucleoside triphosphate hydrolase
AT1G12640	15.8267	23.0533	7.75	10.3567	2.34667	4.56	8.41333	8.19667	3	6.08	0.000101182	1	1	PF03062 MBOAT family / PF03062 MBOAT family	IPR004299 Membrane bound O-acyl transferase, MBOAT
AT5G64910	0.216667	0.316667	0.96	1.63	0.05	0.203333	0.0466667	0	0.2	0.26	0.000102703	1	1
AT1G30940	0.0233333	0	0.673333	1.49	0.92	1.2	0.14	0.07	0.96	1.96667	0.000102819	1	1
AT1G09500	0.556667	1.17667	3.10667	4.35667	2.08667	8.80667	0.11	0	3.16667	1.31	0.000103012	1	0.0143529	PF01370 NAD dependent epimerase/dehydratase family	IPR001509 NAD-dependent epimerase/dehydratase / IPR016040 NAD(P)-binding domain
AT3G21010	0.993333	0.666667	1.14	1.01667	0.99	0.61	0.843333	0.64	2.97667	3.07333	0.000105647	1	1
AT1G17880	176.467	107.51	63.9733	45	76.5767	52.84	79.7733	58.5767	83.7233	77.03	0.000105974	0.453868	1	PF01849 NAC domain	IPR002715 Nascent polypeptide-associated complex NAC domain
AT1G43910	5.04667	8.66	7.24333	10.4767	4.70333	3.44667	6.27	4.07333	25.84	108.23	0.000106147	1	0.0713778	PF14363 Domain associated at C-terminal with AAA / PF00004 ATPase family associated with various cellular activities (AAA)	IPR025753 AAA-type ATPase, N-terminal domain / IPR003959 ATPase, AAA-type, core / IPR003593 AAA+ ATPase domain / IPR027417 P-loop containing nucleoside triphosphate hydrolase
AT5G54090	4.25	5.45	5.56667	7.72	8.95	9.56	8.52	10.25	7.92333	10.0533	0.000106475	0.654365	1	PF00488 MutS domain V	IPR000432 DNA mismatch repair protein MutS, C-terminal / IPR005747 DNA mismatch repair protein MutS, type 2 / IPR007696 DNA mismatch repair protein MutS, core / IPR027417 P-loop containing nucleoside triphosphate hydrolase
AT5G41870	8.93	18.2533	13.5633	26.46	5.19	8.47	11.75	16.7033	4.86667	8.95333	0.000107052	0.000959645	1	PF00295 Glycosyl hydrolases family 28	IPR000743 Glycoside hydrolase, family 28 / IPR006626 Parallel beta-helix repeat / IPR011050 Pectin lyase fold/virulence factor / IPR012334 Pectin lyase fold
AT1G32520	36.31	30.4367	5.05333	3.67333	1.58	3.77	3.57333	3.56333	40.6867	60.2933	0.00010721	1	1	PF07534 TLD	IPR006571 TLDc / IPR024644 Interferon-induced protein 44 family
AT1G48850	46.0133	41.76	49.54	38.7667	26.4367	22.4767	25.8467	17.8733	51.09	42.3967	0.000107708	1	1	PF01264 Chorismate synthase	IPR000453 Chorismate synthase / IPR020541 Chorismate synthase, conserved site
AT1G53250	3.73333	1.67	3.91667	1.78333	3.10333	1.51667	7.33333	4.58	6.37333	2.27333	0.000107738	6.51615e-06	1
AT2G04050	0.156667	0.243333	0.98	6.09	0.823333	0.496667	0.51	0.213333	0.32	0.426667	0.000107844	1	0.00257466	PF01554 MatE / PF01554 MatE	IPR002528 Multi antimicrobial extrusion protein
AT1G31820	4.36	7.48333	0.11	0.163333	0.106667	0.616667	0.296667	0.226667	0.126667	0.296667	0.000108195	1	1	PF13520 Amino acid permease	IPR002293 Amino acid/polyamine transporter I
AT1G29790	11.0433	11.6333	4.36667	4.67333	5.82667	6.64	4.96	4.80667	6.03	6.47667	0.000108827	1	1	PF03141 Putative methyltransferase	IPR004159 Putative S-adenosyl-L-methionine-dependent methyltransferase
AT1G28210	1.77667	1.82667	1.92	1.7	5.17333	4.96333	3.57667	1.85	2.16333	3.60667	0.000109183	1	1	PF00684 DnaJ central domain (4 repeats) / PF00226 DnaJ domain / PF01556 DnaJ C terminal region	IPR001305 Heat shock protein DnaJ, cysteine-rich domain / IPR001623 DnaJ domain / IPR002939 Chaperone DnaJ, C-terminal / IPR008971 HSP40/DnaJ peptide-binding / IPR018253 DnaJ domain, conserved site / IPR012724 Chaperone DnaJ
AT1G17160	12.09	16.69	3.95667	5.05667	4.32	5.38333	11	17.2667	2.90667	8.76333	0.000110305	1	1	PF00294 pfkB family carbohydrate kinase	IPR011611 Carbohydrate kinase PfkB / IPR002139 Ribokinase / IPR002173 Carbohydrate/puine kinase, PfkB, conserved site
AT5G64640	2.77333	3.48667	3.98333	3.87	11.5767	13.4033	6.2	9.71	4.04667	5.51667	0.000110372	1	1	PF04043 Plant invertase/pectin methylesterase inhibitor / PF01095 Pectinesterase	IPR006501 Pectinesterase inhibitor / IPR000070 Pectinesterase, catalytic / IPR011050 Pectin lyase fold/virulence factor / IPR012334 Pectin lyase fold
AT3G20970	16.5567	15.63	6.21667	8.08667	15.7967	14.84	17.8067	16.54	18.2767	16.1	0.000112286	1	1	PF01106 NifU-like domain / PF08712 Scaffold protein Nfu/NifU N terminal	IPR001075 NIF system FeS cluster assembly, NifU, C-terminal / IPR014824 NIF system FeS cluster assembly, NifU-like scaffold, N-terminal / IPR017065 HIRA-interacting protein 5
AT3G27940	1.67333	1.59	0	0	0	0	1.13667	0.81	1.81333	3.57333	0.000112505	1	1	PF03195 Protein of unknown function DUF260	IPR004883 Lateral organ boundaries, LOB
AT3G42052	0.616667	0.89	0.513333	0.8	0.92	1.03667	0	0	0.763333	1.2	0.000112955	1	1
AT5G62200	13.9467	23.83	21.3333	52.6933	16.05	31.1567	13.5667	26.4667	21.1667	52.9733	0.000113848	3.85047e-08	0.571646	PF06232 Embryo-specific protein 3, (ATS3)	IPR010417 Embryo-specific 3 / IPR008976 Lipase/lipooxygenase, PLAT/LH2 / IPR001024 Lipoxygenase, LH2
AT1G69230	1.57333	2.5	2.27333	7.45	2.45	13.38	2.52	5.80333	1.35667	2.70667	0.000114398	2.3036e-06	0.00244255
AT1G15720	0.943333	1.01	0.186667	0.25	0.0533333	0.253333	0.13	0.13	0.213333	0.18	0.000115288	1	1	PF00249 Myb-like DNA-binding domain	IPR001005 SANT/Myb domain / IPR017930 Myb domain / IPR009057 Homeodomain-like
AT5G43790	2.45	2.79	0.0566667	0.0533333	0.103333	0.0833333	2.18667	1.68	0.72	0.916667	0.000115486	1	1	PF01535 PPR repeat 10-34 52-76 94-118 / PF01535 PPR repeat 10-34 52-76 94-118 / PF01535 PPR repeat 10-34 52-76 94-118 / PF01535 PPR repeat 10-34 52-76 94-118 / PF01535 PPR repeat 10-34 52-76 94-118	IPR002885 Pentatricopeptide repeat
AT3G12050	25.2967	27.5833	19.8367	19.1867	20.3533	29.9533	25.3467	24.4933	41.2767	61.04	0.000115644	1	1	PF08327 Activator of Hsp90 ATPase homolog 1-like protein / PF09229 Activator of Hsp90 ATPase, N-terminal	IPR013538 Activator of Hsp90 ATPase homologue 1-like / IPR015310 Activator of Hsp90 ATPase, N-terminal / IPR023393 START-like domain
AT3G26240	4.57	3.90667	0.0533333	0	1.98333	2.30667	0	0	0.89	0.74	0.000116253	1	1	PF03107 C1 domain / PF03107 C1 domain / PF03107 C1 domain / PF07649 C1-like domain / PF07649 C1-like domain	IPR004146 DC1 / IPR011424 C1-like / IPR013083 Zinc finger, RING/FYVE/PHD-type
AT1G69295	30.33	35.88	32.3467	58.7467	12.1	16.54	11.5767	14.16	34.17	74.9367	0.000116411	0.203788	1	PF07983 X8 domain	IPR012946 X8
AT3G56460	40.62	58.9733	36.72	67.4367	39.91	64.09	32.68	47	46.68	92.59	0.000118256	5.53046e-09	0.679762	PF00107 Zinc-binding dehydrogenase / PF08240 Alcohol dehydrogenase GroES-like domain	IPR013154 Alcohol dehydrogenase GroES-like / IPR013149 Alcohol dehydrogenase, C-terminal / IPR002085 Alcohol dehydrogenase superfamily, zinc-type / IPR011032 GroES-like / IPR002364 Quinone oxidoreductase/zeta-crystallin, conserved site / IPR020843 Polyketide synthase, enoylreductase / IPR016040 NAD(P)-binding domain
AT5G64530	2.02	4.85	2.33667	4.69333	1.00333	3.14667	2.37	5.01	2.51	17.4167	0.000119147	1.526e-05	0.000781518	PF02365 No apical meristem (NAM) protein	IPR003441 No apical meristem (NAM) protein
AT1G74170	3.04667	5.03	3.35667	4.88	4.66333	4.72	0.0333333	0.04	4.04667	5.72333	0.000119192	1	1	PF00560 Leucine Rich Repeat 17-38 40-61 / PF00560 Leucine Rich Repeat 17-38 40-61 / PF00560 Leucine Rich Repeat 17-38 40-61 / PF00560 Leucine Rich Repeat 17-38 40-61 / PF13855 Leucine rich repeat / PF13855 Leucine rich repeat / PF13855 Leucine rich repeat / PF13855 Leucine rich repeat / PF13855 Leucine rich repeat	IPR001611 Leucine-rich repeat
AT5G02410	3.95667	5.25	2.88	3.21	2.85	2.30333	4.79667	4.49	5.88	7.49667	0.000120541	1	1	PF04922 DIE2/ALG10 family	IPR007006 Glycosyltransferase, ALG10 / IPR016900 Alpha-1, 2 glucosyltransferase Alg10
AT5G26780	17.6067	22.6733	26.0333	26.5367	24.4333	28.1133	24.0167	20.3367	11.65	13.57	0.000121395	1	1	PF00464 Serine hydroxymethyltransferase	IPR001085 Serine hydroxymethyltransferase / IPR015421 Pyridoxal phosphate-dependent transferase, major region, subdomain 1 / IPR015422 Pyridoxal phosphate-dependent transferase, major region, subdomain 2 / IPR015424 Pyridoxal phosphate-dependent transferase / IPR019798 Serine hydroxymethyltransferase, pyridoxal phosphate binding site
AT1G23940	0.39	0.623333	3.59333	2.24667	2.61	2.24333	0	0	0.113333	0.0666667	0.000121657	1	1	PF01602 Adaptin N terminal region	IPR002553 Clathrin/coatomer adaptor, adaptin-like, N-terminal / IPR016024 Armadillo-type fold / IPR011989 Armadillo-like helical / IPR017107 Adaptor protein complex AP-1, gamma subunit
AT3G49055	0.146667	0.196667	0.143333	0.36	0.183333	0.32	1.24	1.27667	0.113333	0.536667	0.000122632	1	1
AT4G21350	5.80333	9.86	1.39	1.71	1.42333	1.42667	1.58667	1.8	1.97	3.96333	0.000123515	1	1	PF05804 Kinesin-associated protein (KAP) / PF04564 U-box domain	IPR003613 U box domain / IPR016024 Armadillo-type fold / IPR013083 Zinc finger, RING/FYVE/PHD-type / IPR011989 Armadillo-like helical / IPR000225 Armadillo
AT2G15560	7.83333	12.43	3.61	4.01333	3.83333	2.50667	4.42333	3.92	3.64667	5.40333	0.000123616	1	1	PF01936 Protein of unknown function DUF88 / PF12872 OST-HTH/LOTUS domain / PF12872 OST-HTH/LOTUS domain	IPR021139 NYN domain, limkain-b1-type / IPR025605 OST-HTH/LOTUS domain / IPR024768 Limkain-b1
AT5G05780	45.0167	45.6867	24.5333	24.42	55.5967	54.3567	47.3433	45.7667	26.6267	42.3633	0.000125034	1	1	PF01398 Mov34/MPN/PAD-1 family / PF13012 Maintenance of mitochondrial structure and function	IPR000555 JAB1/Mov34/MPN/PAD-1 / IPR024969 Rpn11/EIF3F C-terminal domain
AT5G45470	11.5467	17.1367	14.99	14.5433	15.6533	15.6033	7.31667	5.03667	17.8467	20.9867	0.000125604	1	1	PF04578 Protein of unknown function, DUF594 / PF13968 Domain of unknown function (DUF4220)	IPR007658 Protein of unknown function DUF594 / IPR025315 Domain of unknown function DUF4220
AT5G09230	10.55	11.51	12.9567	16.4767	2.84333	4.27667	12.77	13.7267	14.82	19.0867	0.000127499	1	1	PF02146 Sir2 family / PF02146 Sir2 family	IPR003000 Sirtuin family / IPR026590 Sirtuin family, catalytic core domain / IPR026591 Sirtuin family, catalytic core small domain
AT5G66360	5.47333	7.35333	3.25333	7.31	4.26	6.42333	4.56	8.52	1.40667	2.47	0.000128284	0.000147088	1	PF00398 Ribosomal RNA adenine dimethylase	IPR001737 Ribosomal RNA adenine methylase transferase / IPR020596 Ribosomal RNA adenine methylase transferase, conserved site / IPR025814 18S rRNA dimethylase DIM1 / IPR020598 Ribosomal RNA adenine methylase transferase, N-terminal
AT1G60770	8.10667	6.86667	10.65	8.29	8.61667	7.71	10.6233	7.67	14.47	15.4667	0.000128302	1	1	PF01535 PPR repeat 10-34 52-76 94-118 / PF01535 PPR repeat 10-34 52-76 94-118 / PF01535 PPR repeat 10-34 52-76 94-118 / PF01535 PPR repeat 10-34 52-76 94-118 / PF01535 PPR repeat 10-34 52-76 94-118 / PF01535 PPR repeat 10-34 52-76 94-118 / PF13041 PPR repeat family	IPR002885 Pentatricopeptide repeat / IPR011990 Tetratricopeptide-like helical
AT1G32400	49.3833	62.9567	33.8767	47.1833	36.9433	49.93	30.79	38.9	24.96	37.6933	0.000130559	0.000835075	1	PF00335 Tetraspanin family / PF00335 Tetraspanin family / PF00335 Tetraspanin family / PF00335 Tetraspanin family	IPR018499 Tetraspanin/Peripherin
AT3G45020	3.49	3.28	0	0.0366667	0.106667	0.0766667	0	0	3.37667	9.46333	0.000131975	1	1	PF00861 Ribosomal L18p/L5e family	IPR005484 Ribosomal protein L18/L5
AT3G29810	1.33	0.61	1.82	0.973333	2.05	1.55667	0.22	0.02	2.74333	2.80667	0.000134068	1	1	PF04833 COBRA-like protein	IPR006918 Glycosyl-phosphatidyl inositol-anchored, plant
AT1G65980	105.487	188.41	108.127	270.16	99.4833	252.72	113.433	225.17	43.8933	97.9533	0.00013435	1.23492e-08	1	PF08534 Redoxin	IPR013740 Redoxin / IPR012336 Thioredoxin-like fold
AT5G40230	0.2	0.573333	1.53333	2.98	3.14333	3.15	1.91	0.606667	1.23333	4.96333	0.000134443	1	0.00732431	PF00892 Integral membrane protein DUF6 14-135 / PF00892 Integral membrane protein DUF6 14-135	IPR000620 Drug/metabolite transporter
AT3G44716	2.06333	2.40333	7.01667	9.73667	7.59	8.38667	0.74	1.61	0.103333	0.85	0.000135944	1	1
AT4G12520	0.32	0.3	0.58	0.99	6.64333	6.22667	1.08667	3.62333	0.843333	1.38667	0.000136644	1	1	PF00234 Protease inhibitor/seed storage/LTP family / PF14547 Hydrophobic seed protein	IPR016140 Bifunctional inhibitor/plant lipid transfer protein/seed storage helical domain / IPR027923 Hydrophobic seed protein
AT1G57770	25.8733	20.88	15.2233	8.08	27.2867	21.3	35.4533	22.0567	14.68	7.40667	0.000140203	0.0481306	1	PF13450 NAD(P)-binding Rossmann-like domain	IPR014101 Carotene isomerase
AT5G26160	1.07333	1.23333	1.66	1.92333	2.46667	1.68333	0.486667	0.216667	3.08667	3.08667	0.00014094	1	1	PF10358 Oestrogen-responsive protein Fam102A-B	IPR019448 EEIG1/EHBP1 N-terminal domain
AT5G05750	13.7567	19.8833	1.43667	1.69667	20.0467	22.7267	14.54	19.1633	1.74	2.88667	0.000141142	1	1	PF00226 DnaJ domain	IPR001623 DnaJ domain / IPR019734 Tetratricopeptide repeat / IPR013026 Tetratricopeptide repeat-containing domain / IPR018253 DnaJ domain, conserved site
AT1G43640	0.0566667	0.04	0.0966667	1	0.676667	1.92333	0.0366667	0	0.13	0.113333	0.000141228	0.985707	1	PF00646 F-box domain / PF00646 F-box domain / PF01167 Tub family	IPR001810 F-box domain, cyclin-like / IPR000007 Tubby, C-terminal / IPR025659 Tubby C-terminal-like domain / IPR018066 Tubby, C-terminal, conserved site
AT1G19750	0.253333	0.706667	0.743333	0.976667	0.576667	1.26333	0.35	0.63	1.32333	2.89333	0.00014233	0.0510033	1	PF00400 WD domain, G-beta repeat 893-931 938-975 1109-1147 1194-1232 1236-1273 1277-1315 1319-1357 1361-1399 / PF00400 WD domain, G-beta repeat 893-931 938-975 1109-1147 1194-1232 1236-1273 1277-1315 1319-1357 1361-1399 / PF00400 WD domain, G-beta repeat 893-931 938-975 1109-1147 1194-1232 1236-1273 1277-1315 1319-1357 1361-1399 / PF00400 WD domain, G-beta repeat 893-931 938-975 1109-1147 1194-12…	IPR001680 WD40 repeat / IPR017986 WD40-repeat-containing domain / IPR020472 G-protein beta WD-40 repeat / IPR015943 WD40/YVTN repeat-like-containing domain / IPR019775 WD40 repeat, conserved site
AT5G40350	0.13	0.04	0.0766667	0.0533333	2.4	0.0733333	0.353333	0.213333	0.273333	0	0.000145366	0.00420178	0.000165878	PF00249 Myb-like DNA-binding domain / PF00249 Myb-like DNA-binding domain	IPR001005 SANT/Myb domain / IPR009057 Homeodomain-like / IPR017930 Myb domain
AT2G14255	11.8333	12.59	4.24667	4.93667	4.39667	4.22667	5.79667	5.69	4.21	6.27	0.000149096	1	1	PF01529 DHHC zinc finger domain / PF00023 Ankyrin repeat 160-187 257-278 / PF12796 Ankyrin repeats (3 copies) / PF12796 Ankyrin repeats (3 copies) / PF13606 Ankyrin repeat / PF12796 Ankyrin repeats (3 copies)	IPR001594 Zinc finger, DHHC-type, palmitoyltransferase / IPR002110 Ankyrin repeat / IPR020683 Ankyrin repeat-containing domain
AT3G18240	3.35	4.23	5.41333	4.25667	4.94	4.30333	5.07667	3.52333	7.22667	9.36333	0.000150978	1	1	PF10213 Mitochondrial ribosomal subunit protein	IPR019349 Ribosomal protein S24/S35, mitochondrial, conserved domain
AT4G26730	0	0	0.0633333	0	0.773333	0.96	0	0	0.0533333	0.133333	0.000152303	1	1	PF08241 Methyltransferase domain	IPR013216 Methyltransferase type 11
AT2G06002	0.613333	0.586667	0.34	0.206667	0.59	0.283333	2.13	2.67667	0.346667	0.81	0.000152918	1	1
AT3G05730	159.247	113.68	110.27	53.8033	81.64	46.19	348.917	258.903	88.87	36.85	0.000153748	1	1
AT1G62480	182.64	73.9033	89.2533	42.7233	67.3167	16.4667	27.56	12.6933	13.2733	5.8	0.000154164	0.0535797	1
AT5G17320	0	0.08	1.67	0.79	1.46	0.59	0.0233333	0	0.69	0.0866667	0.000155708	0.486703	1	PF00046 Homeobox domain / PF01852 START domain	IPR001356 Homeodomain / IPR002913 START domain / IPR009057 Homeodomain-like / IPR023393 START-like domain
AT1G02850	3.67333	11.4967	0.653333	9.58333	1	7.63667	1.13333	2.34667	2.16667	41.2967	0.000159772	1.85082e-05	0.000372429	PF00232 Glycosyl hydrolase family 1	IPR001360 Glycoside hydrolase, family 1 / IPR018120 Glycoside hydrolase, family 1, active site / IPR013781 Glycoside hydrolase, catalytic domain / IPR017853 Glycoside hydrolase, superfamily
AT4G13493	9.91667	7.66333	21.81	25.1067	26.9067	24.2667	18.2567	19.0133	57.6	48.1	0.00015993	1	1
AT4G32960	9.27667	9.66	3.53	4.44333	4.05	4.34667	11.3767	12.8267	12.3767	22.06	0.000160296	1	1		IPR026126 BRISC and BRCA1-A complex member 1
AT4G05040	4.31333	4.82	0.393333	0.3	0.47	0.41	0	0	0.4	0.586667	0.000160625	1	1	PF00023 Ankyrin repeat 160-187 257-278 / PF12796 Ankyrin repeats (3 copies) / PF12796 Ankyrin repeats (3 copies) / PF12796 Ankyrin repeats (3 copies) / PF12796 Ankyrin repeats (3 copies) / PF13962 Domain of unknown function	IPR002110 Ankyrin repeat / IPR020683 Ankyrin repeat-containing domain / IPR026961 PGG domain
AT5G19170	0.716667	0.61	0	0.0233333	0	0.06	0.926667	0.816667	0	0	0.000161565	1	1	PF14365 Domain of unknown function (DUF4409) / PF03080 Arabidopsis proteins of unknown function	IPR025521 Domain of unknown function DUF4409 / IPR004314 Domain of unknown function DUF239
AT3G20960	0.666667	1.88667	0.95	2.25333	3.43	3.54333	1.12333	1.72333	2.48333	6.49	0.000161699	0.0343488	1	PF00067 Cytochrome P450	IPR001128 Cytochrome P450 / IPR017972 Cytochrome P450, conserved site / IPR002401 Cytochrome P450, E-class, group I
AT1G62630	6.21	9.3	2.29	1.44	13.8267	13.13	5.32667	3.62333	8.73333	9.29667	0.000163408	1	1	PF00931 NB-ARC domain / PF12799 Leucine Rich repeats (2 copies)	IPR002182 NB-ARC / IPR025875 Leucine rich repeat 4 / IPR000767 Disease resistance protein / IPR027417 P-loop containing nucleoside triphosphate hydrolase
AT1G78770	0.996667	0.62	1.11333	0.683333	0.916667	0.583333	1.14667	0.793333	2.2	3.38333	0.000165263	1	1	PF12895 Anaphase-promoting complex, cyclosome, subunit 3 / PF13176 Tetratricopeptide repeat / PF13414 TPR repeat / PF00515 Tetratricopeptide repeat 509-542 543-576 / PF07719 Tetratricopeptide repeat 509-542 / PF07719 Tetratricopeptide repeat 509-542	IPR001440 Tetratricopeptide TPR-1 / IPR013105 Tetratricopeptide TPR2 / IPR019734 Tetratricopeptide repeat / IPR013026 Tetratricopeptide repeat-containing domain / IPR011990 Tetratricopeptide-like helical
AT4G05320	1131.29	1366.35	536.863	561.417	696.673	538.983	565.54	408.743	757.74	961.783	0.000166362	1	1	PF00240 Ubiquitin family / PF00240 Ubiquitin family / PF00240 Ubiquitin family / PF00240 Ubiquitin family / PF00240 Ubiquitin family / PF00240 Ubiquitin family	IPR000626 Ubiquitin / IPR019954 Ubiquitin conserved site / IPR019955 Ubiquitin supergroup / IPR019956 Ubiquitin subgroup
AT1G44920	56.77	47.6	57.5533	48.1167	20.14	17.45	51.44	49.2367	41.4433	29.4633	0.00016665	1	1	PF11255 Protein of unknown function (DUF3054)	IPR021414 Protein of unknown function DUF3054
AT1G30510	10.3967	15.1	2.81333	3.79667	3.97	4.96333	2.05	3.89667	2.81	5.9	0.000167832	1	1	PF00175 Oxidoreductase NAD-binding domain / PF00970 Oxidoreductase FAD-binding domain	IPR001433 Oxidoreductase FAD/NAD(P)-binding / IPR008333 Oxidoreductase, FAD-binding domain / IPR012146 Ferredoxin-NADP+ reductase / IPR015701 Ferredoxin Reductase / IPR017938 Riboflavin synthase-like beta-barrel / IPR017927 Ferredoxin reductase-type FAD-binding domain / IPR001709 Flavoprotein pyridine nucleotide cytochrome reductase
AT3G30122	0.426667	0.43	1.04	1.27	0.516667	1.26	0.0133333	0.0166667	0.78	2.46	0.000169458	0.306417	1
AT1G78200	20.93	30.5	21.91	34.4467	19.2667	27.0467	33.29	35.02	32.3433	76.6667	0.000170008	0.00236597	0.124201	PF00481 Protein phosphatase 2C 8-151 / PF00481 Protein phosphatase 2C 8-151	IPR001932 Protein phosphatase 2C (PP2C)-like / IPR015655 Protein phosphatase 2C
AT4G06748	0	0	0	0	0.633333	1.07667	0	0	0.896667	1.59333	0.000171447	1	1
AT4G22990	10.4933	12.5633	12.5233	15.6067	2.42333	3.19667	1.83333	2.34333	9.99667	8.45	0.000172332	1	1	PF07690 Major Facilitator Superfamily / PF03105 SPX domain / PF03105 SPX domain / PF03105 SPX domain	IPR011701 Major facilitator superfamily / IPR004331 SPX, N-terminal / IPR016196 Major facilitator superfamily domain, general substrate transporter
AT1G79390	20.2433	20.9767	17.67	22.49	20.38	24.3933	17.2867	21.8	28.5767	57.2033	0.000176293	0.307553	1
AT4G19045	5.16333	7.56	3.10333	5.40333	0.6	0.896667	1.94667	1.75	5.06667	8.42	0.00017678	1	1	PF03637 Mob1/phocein family	IPR005301 Mob1/phocein
AT5G42460	5.43667	10.6767	0.0333333	0.0233333	4.94	4.44667	5.56	6.34333	5.55333	5.97333	0.000177078	1	1	PF00646 F-box domain / PF07734 F-box associated	IPR001810 F-box domain, cyclin-like / IPR006527 F-box associated domain, type 1 / IPR017451 F-box associated interaction domain
AT3G43690	3.36333	3.97	0.733333	0.666667	0.69	0.803333	0	0.0133333	0	0	0.000178386	1	1
AT4G30720	13.68	14.7767	34.0533	26.2067	33.6133	28.42	36.1433	31.68	37.41	23.8433	0.00017954	1	1	PF01266 FAD dependent oxidoreductase / PF00070 Pyridine nucleotide-disulphide oxidoreductase 144-177 / PF07992 Pyridine nucleotide-disulphide oxidoreductase	IPR006076 FAD dependent oxidoreductase / IPR001327 Pyridine nucleotide-disulphide oxidoreductase, NAD-binding domain / IPR023753 Pyridine nucleotide-disulphide oxidoreductase, FAD/NAD(P)-binding domain
AT2G36570	6.81	9.61667	9.66333	8.89	5.67	8.40667	2.6	3.36	8.86333	7.70333	0.000179862	1	1	PF00069 Protein kinase domain	IPR000719 Protein kinase, catalytic domain / IPR011009 Protein kinase-like domain / IPR020635 Tyrosine-protein kinase, catalytic domain / IPR002290 Serine/threonine- / dual specificity protein kinase, catalytic domain
AT1G61310	1.95	3.01667	5.26	4.24667	3.08	2.72667	4.81333	3.73667	9.24667	9.55333	0.000180841	1	1	PF13855 Leucine rich repeat / PF00931 NB-ARC domain	IPR002182 NB-ARC / IPR027417 P-loop containing nucleoside triphosphate hydrolase / IPR000767 Disease resistance protein
AT3G29280	5.17333	4.65333	2.17667	1.68333	11.9867	12.4467	6.57667	5.63	5.19	4.37	0.000181373	1	1
AT1G32220	89.82	75.7233	45.68	39.9067	77.93	77.0567	41.56	43.8333	49.42	33.6667	0.000182314	1	1	PF13460 NADH(P)-binding / PF13460 NADH(P)-binding	IPR016040 NAD(P)-binding domain
AT2G15030	0.193333	0.523333	0.943333	1.14667	1.27333	1.00667	0.196667	0.396667	0.0166667	0.16	0.000183251	1	1
AT2G05230	2.87	4.03	6.22667	10.09	7.86	10.0267	5.58333	5.36667	7.59667	13.6	0.00018342	0.137638	1	PF00226 DnaJ domain / PF11926 Domain of unknown function (DUF3444)	IPR001623 DnaJ domain / IPR024593 Domain of unknown function DUF3444 / IPR018253 DnaJ domain, conserved site
AT3G20420	3.48333	5.28667	1.50333	2.83333	6.31	6.88	2.17667	2.39333	6.68667	10.9533	0.00018347	1	1	PF00035 Double-stranded RNA binding motif / PF00035 Double-stranded RNA binding motif / PF00636 RNase3 domain	IPR001159 Double-stranded RNA-binding / IPR000999 Ribonuclease III domain / IPR014720 Double-stranded RNA-binding-like domain / IPR011907 Ribonuclease III
AT1G59930	6.47333	8.05333	24.0867	5.28	13.2033	7.49	0.516667	0.4	16.8067	3.10667	0.000183655	0.000223392	0.00383178
AT1G11880	1.48	2.79667	0.263333	0.5	0.396667	0.31	0.253333	0.526667	0.313333	0.393333	0.000184937	1	1	PF04188 Mannosyltransferase (PIG-V)) / PF04188 Mannosyltransferase (PIG-V))	IPR007315 GPI mannosyltransferase 2
AT1G23970	5.79333	5.55333	5.28333	8.77333	3.22667	4.49333	0.943333	0.546667	2.02333	6.48333	0.000186313	1	1	PF04776 Protein of unknown function (DUF626) / PF04776 Protein of unknown function (DUF626)	IPR006462 Protein of unknown function DUF626, Arabidopsis thaliana
AT4G13495	361.843	298.303	101.993	105.98	192.627	222.807	95.4967	110.667	198.333	207.53	0.000186434	1	1
AT1G52610	0	0	0	0	0.0133333	0.0566667	0	0	0.763333	1.04667	0.000186513	1	1
AT4G28200	9.64667	12.06	10.0267	12.81	10.59	13.16	12.5467	12.7833	16.8167	27.4667	0.000186637	0.818195	1	PF08640 U3 small nucleolar RNA-associated protein 6	IPR013949 U3 small nucleolar RNA-associated protein 6 / IPR003107 RNA-processing protein, HAT helix / IPR011990 Tetratricopeptide-like helical
AT3G06125	60.9833	53.07	3.99333	3.31	1.34	2.42667	6.12333	8.16333	2.24	3.96667	0.000188407	1	1
AT3G50000	40.6733	50.24	21.56	29.0967	45.0367	61.3633	48.8	62.5833	17.98	38.63	0.000190214	0.0643053	1	PF00069 Protein kinase domain	IPR000719 Protein kinase, catalytic domain / IPR011009 Protein kinase-like domain / IPR002290 Serine/threonine- / dual specificity protein kinase, catalytic domain / IPR020635 Tyrosine-protein kinase, catalytic domain / IPR017441 Protein kinase, ATP binding site / IPR008271 Serine/threonine-protein kinase, active site
AT3G05690	2.04667	11.12	4.10333	28.16	2.6	18.1667	3.52333	13.76	10.3233	103.44	0.000191174	0.000144538	0.00334635	PF02045 CCAAT-binding transcription factor (CBF-B/NF-YA) subunit B	IPR001289 CCAAT-binding transcription factor, subunit B
AT5G63630	2.34333	3.95667	0.82	0.973333	3.15333	3.40667	2.08667	2.19333	2.47333	3.75667	0.000192716	1	1	PF00270 DEAD/DEAH box helicase / PF00271 Helicase conserved C-terminal domain	IPR001650 Helicase, C-terminal / IPR011545 DNA/RNA helicase, DEAD/DEAH box type, N-terminal / IPR014001 Helicase, superfamily 1/2, ATP-binding domain / IPR014014 RNA helicase, DEAD-box type, Q motif / IPR027417 P-loop containing nucleoside triphosphate hydrolase
AT1G25175	13.9	22.06	0.373333	0.0466667	0.0533333	0.0766667	0	0	0	0.15	0.00019311	1	1
AT4G37220	0.653333	1.02333	0.0466667	0	1.84667	3.73333	0.39	0.15	1.17	0.05	0.000195328	1	1	PF05562 Cold acclimation protein WCOR413	IPR008892 Cold acclimation WCOR413
AT1G14530	2.95667	4.38333	4.11333	7.12333	3.74667	4.71333	0.58	0.84	2.87	6.44333	0.000195531	0.0437365	1	PF06454 Protein of unknown function (DUF1084)	IPR009457 Domain of unknown function DUF1084
AT4G17050	37.7433	52.92	43.9867	57.33	69.9133	81.8733	42.74	49.6833	51.92	54.98	0.000198175	0.672939	1	PF07883 Cupin domain	IPR013096 Cupin 2, conserved barrel / IPR014710 RmlC-like jelly roll fold / IPR011051 RmlC-like cupin domain
AT5G46630	34.8933	56.5833	38.4933	60.05	58.9667	57.6567	21.21	21.9267	17.3267	34.3067	0.000200649	1	1	PF00928 Adaptor complexes medium subunit family	IPR008968 Clathrin adaptor, mu subunit, C-terminal / IPR018240 Clathrin adaptor, mu subunit, conserved site / IPR015629 Clathrin coat associated protein AP-50 / IPR001392 Clathrin adaptor, mu subunit / IPR011012 Longin-like domain
AT2G37970	80.1367	97.73	9.77667	8.32333	3.47667	7.85667	43.2167	23.5867	7.02	10.01	0.000201619	1	1	PF04832 SOUL heme-binding protein	IPR006917 SOUL haem-binding protein / IPR011256 Regulatory factor, effector, bacterial
AT1G73680	8.43	18.0267	10.3467	22.43	9.49	22.5633	9.09	13.5467	21.9167	37.86	0.000201982	7.10431e-05	1	PF03098 Animal haem peroxidase 10-105	IPR002007 Haem peroxidase, animal / IPR010255 Haem peroxidase
AT1G65410	16.5867	23.0267	16.79	21.5233	17.3333	19.1567	17.7667	17.94	6.39333	9.87667	0.000204187	1	1	PF00005 ABC transporter / PF00005 ABC transporter	IPR003439 ABC transporter-like / IPR027417 P-loop containing nucleoside triphosphate hydrolase / IPR003593 AAA+ ATPase domain / IPR017871 ABC transporter, conserved site
AT5G28913	3.30667	4.81	2.67667	3.13667	0	0.04	0	0	1.43333	1.83333	0.000206074	1	1
AT3G10450	2.24667	4.79667	10.36	23.19	9.27333	28.1267	7.89	12.0133	14.35	22.69	0.000207729	0.000225224	1	PF00450 Serine carboxypeptidase	IPR001563 Peptidase S10, serine carboxypeptidase
AT1G34200	4.97333	7.74667	2.50667	3.05667	2.30333	3.25667	1.81333	1.74667	2.07667	5.18667	0.000208011	0.434219	1	PF02894 Oxidoreductase family, C-terminal alpha/beta domain / PF01408 Oxidoreductase family, NAD-binding Rossmann fold	IPR004104 Oxidoreductase, C-terminal / IPR000683 Oxidoreductase, N-terminal / IPR016040 NAD(P)-binding domain
AT2G27402	46.87	13.6867	0.71	0	0	0	0.0633333	0	0	0	0.000208751	1	1
AT2G04160	9.74667	9.84667	11.2133	12.5333	6.68	9.95667	3.95667	5.03	26.4733	19.96	0.000209855	1	1	PF00082 Subtilase family / PF02225 PA domain / PF05922 Peptidase inhibitor I9	IPR003137 Protease-associated domain, PA / IPR010259 Proteinase inhibitor I9 / IPR000209 Peptidase S8/S53 domain / IPR015500 Peptidase S8, subtilisin-related / IPR023828 Peptidase S8, subtilisin, Ser-active site
AT5G43770	0	0.06	0	0.68	0	2.73333	0	0	0	0.68	0.000210611	8.96331e-05	0.000210611
AT4G21640	0	0.0133333	1.27333	1.72667	0	0.0333333	0	0	1.40667	1.15333	0.000211522	1	1	PF05922 Peptidase inhibitor I9 / PF00082 Subtilase family	IPR010259 Proteinase inhibitor I9 / IPR000209 Peptidase S8/S53 domain / IPR015500 Peptidase S8, subtilisin-related / IPR023828 Peptidase S8, subtilisin, Ser-active site
AT5G43725	1.69333	2.51	0.226667	0.363333	0.06	0.453333	0.05	0.0533333	0.29	0.7	0.00021191	1	1
AT3G49910	299.503	178.777	276.907	183.53	107.35	74.4633	115.047	80.8333	321.137	416.727	0.000213478	1	1	PF00467 KOW motif	IPR005824 KOW / IPR005756 Ribosomal protein L26/L24P, eukaryotic/archaeal / IPR008991 Translation protein SH3-like domain / IPR014722 Ribosomal protein L2 domain 2 / IPR005825 Ribosomal protein L24/L26, conserved site
AT5G49550	6.18667	8.46667	6.14	10.23	8.12	9.35333	0.633333	1.90333	1.13333	2.87667	0.000213504	1	1	PF10046 Biogenesis of lysosome-related organelles complex-1 subunit 2	IPR019269 Biogenesis of lysosome-related organelles complex-1, subunit 2
AT1G09760	25.17	20.42	12.5767	13.2	14.0167	12.7533	24.5633	20.6533	15.6833	18.1567	0.000214286	1	1	PF14580 Leucine-rich repeat	IPR003603 U2A'/phosphoprotein 32 family A, C-terminal
AT1G65000	4.05667	6.24	1.19	3.98667	3.61	8.01	4.08667	8.34333	0.453333	1.49667	0.000214315	0.000920486	1
AT4G15800	44.5133	50.3267	48.5867	41.8333	46.04	82.8267	27.0967	50.73	13.9867	22.7033	0.000215151	0.592916	1	PF05498 Rapid ALkalinization Factor (RALF)	IPR008801 Rapid ALkalinization Factor
AT1G24340	8.02	6.03667	11.7367	10.74	2.24667	2.03	2.68	1.99	10.06	5.81	0.000216929	1	1	PF01494 FAD binding domain	IPR002938 Monooxygenase, FAD-binding / IPR003042 Aromatic-ring hydroxylase-like
AT2G25580	2.38	3.05333	3.23333	3.53333	3.09667	2.82667	1.57667	1.27667	4.86	6.28667	0.00022231	1	1	PF01535 PPR repeat 10-34 52-76 94-118 / PF01535 PPR repeat 10-34 52-76 94-118 / PF14432 DYW family of nucleic acid deaminases	IPR002885 Pentatricopeptide repeat
AT4G21460	6.94	10.2067	4.38667	6.53	7.15333	7.67667	2.72333	2.34	6.35	8.58667	0.000223723	1	1	PF10213 Mitochondrial ribosomal subunit protein	IPR019349 Ribosomal protein S24/S35, mitochondrial, conserved domain
AT5G23570	5.35333	9.72333	15.7767	25.8933	18.8867	25.0733	11.2733	13.0933	16.13	27.72	0.00022379	0.0315895	1	PF03468 XS domain / PF03470 XS zinc finger domain	IPR005381 Zinc finger-XS domain / IPR005380 XS domain
AT4G39160	5.14667	6.02	7.42333	7.55	9.85	7.47	8.75667	6.89333	8.07	13.4533	0.000224946	1	0.00636221	PF00249 Myb-like DNA-binding domain	IPR001005 SANT/Myb domain / IPR009057 Homeodomain-like / IPR017884 SANT domain
AT1G37150	0.146667	0.25	0.243333	2.28667	0	0	0.533333	1.27333	0.0333333	0.723333	0.000225909	0.000399705	0.0139629	PF03099 Biotin/lipoate A/B protein ligase family	IPR004143 Biotin/lipoate A/B protein ligase / IPR004408 Biotin--acetyl-CoA-carboxylase ligase
AT5G57660	229.577	237.347	286.863	248.873	415.447	260.83	385.063	321.967	92.8333	77.89	0.000228426	1	1	PF06203 CCT motif / PF00643 B-box zinc finger / PF00643 B-box zinc finger	IPR010402 CCT domain / IPR000315 Zinc finger, B-box
AT4G39860	7.03333	6.30667	5.48667	9.05	14.89	15.0667	7.81333	8.29333	4.96	7.70333	0.000228801	1	1	PF13266 Protein of unknown function (DUF4057)	IPR025131 Domain of unknown function DUF4057
AT4G33410	10.3733	10.0767	4.94667	6.79667	4.55667	5.82333	6.19667	7.58667	4.91333	6.06667	0.000230818	1	1	PF04258 Signal peptide peptidase	IPR007369 Peptidase A22B, signal peptide peptidase / IPR006639 Peptidase A22, presenilin signal peptide
AT4G16790	11.1233	15.1533	9.99667	8.56333	3.32	1.66	7.48	3.71667	7.03	10.81	0.00023199	1	1	PF05553 Cotton fibre expressed protein	IPR008480 Protein of unknown function DUF761, plant
AT2G05185	3.34	2.70667	0.0633333	0	0	0	0.296667	0.81	0.383333	1.10667	0.000235054	1	1
AT1G68945	20.06	18.6433	0.44	0.696667	2.33	5.38	0.173333	0.76	0.55	1.16667	0.000235076	1	1
AT5G37340	2.02333	3.25667	4.99	6.28667	4.31333	5.50667	5.33667	7.42333	6.27	9.39667	0.000237569	0.127119	1	PF03367 ZPR1 zinc-finger domain / PF03367 ZPR1 zinc-finger domain	IPR004457 Zinc finger, ZPR1-type
AT5G62980	11.62	11.2833	2.26667	2.51	13.3067	13.2933	10.9767	14.6767	3.14	4.27667	0.00023978	1	1	PF02152 Dihydroneopterin aldolase	IPR006157 Dihydroneopterin aldolase/epimerase domain / IPR006156 Dihydroneopterin aldolase
AT2G35820	28.1767	19.17	34.9567	51.84	41.6433	56.8367	37.1267	41.7367	46.2267	57.0267	0.000239888	1	1	PF04115 Ureidoglycolate hydrolase / PF04115 Ureidoglycolate hydrolase	IPR007247 Ureidoglycolate hydrolase / IPR024060 Ureidoglycolate hydrolase domain / IPR011051 RmlC-like cupin domain
AT5G05930	13.24	15.4733	5.37333	8.04667	18.3433	19.8567	6.84333	10.27	6.79	9.01	0.000242839	1	1	PF09778 Guanylyl cyclase	IPR018616 Guanylyl cyclase
AT1G06640	26.35	33.8767	8.42333	10.3133	10.8	9.21667	8.62667	13.2967	10.59	21.7767	0.000243783	1	1	PF03171 2OG-Fe(II) oxygenase superfamily / PF14226 non-haem dioxygenase in morphine synthesis N-terminal	IPR005123 Oxoglutarate/iron-dependent dioxygenase / IPR027443 Isopenicillin N synthase-like / IPR026992 Non-haem dioxygenase N-terminal domain
AT1G09486	0.83	1.65	0.74	1.10333	0	0	0.25	0.536667	0	0	0.000243791	1	1
AT4G04450	0.323333	0.133333	0.846667	0.52	1.97	0.573333	0.246667	0.263333	0.126667	0.133333	0.000245319	0.900471	0.456782	PF03106 WRKY DNA -binding domain	IPR003657 DNA-binding WRKY
AT1G27350	28.6633	39.52	0.156667	0.473333	0.15	0.153333	24.5133	30.96	26.4133	81.3333	0.000246023	1	1	PF06624 Ribosome associated membrane protein RAMP4	IPR010580 Endoplasmic reticulum, stress-associated Ramp4
AT1G67330	4.87333	4.08	1.40667	1.76	2.14667	2.51333	1.11333	1.16333	7.72	6.45	0.000246071	1	1	PF04669 Protein of unknown function (DUF579)	IPR021148 Putative polysaccharide biosynthesis protein / IPR006514 Xylan biosynthesis protein IRX15/IRX15L
AT1G76300	22.23	16.5933	17.9367	17.63	8.63333	7.24333	25.1867	15.21	22.4567	38.7433	0.000252185	1	0.470023	PF01423 LSM domain	IPR001163 Ribonucleoprotein LSM domain / IPR010920 Like-Sm (LSM) domain / IPR027141 U6 snRNA-associated Sm-like protein LSm4/Small nuclear ribonucleoprotein Sm D1/D3 / IPR006649 Ribonucleoprotein LSM domain, eukaryotic/archaea-type
AT5G19110	0.19	0.463333	0.44	0.28	4.59	0.326667	0.196667	0.103333	0.9	0.17	0.000253583	0.0288281	0.000397348	PF14541 Xylanase inhibitor C-terminal / PF14543 Xylanase inhibitor N-terminal	IPR021109 Aspartic peptidase / IPR001461 Peptidase A1
AT2G32650	32.33	20.2133	10.1733	6.15333	15.1867	7.61333	0.146667	0.186667	17.5967	13.2767	0.000256812	1	1	PF05899 Protein of unknown function (DUF861)	IPR008579 Domain of unknown function DUF861, cupin-3 / IPR011051 RmlC-like cupin domain / IPR014710 RmlC-like jelly roll fold
AT1G14900	3.58667	3.02	5.43667	4.23333	3.45333	3.42	0.773333	1.16333	1.19	0.816667	0.000257468	1	1	PF02178 AT hook motif / PF02178 AT hook motif / PF02178 AT hook motif / PF02178 AT hook motif / PF00538 linker histone H1 and H5 family	IPR017956 AT hook, DNA-binding motif / IPR005818 Histone H1/H5 / IPR020478 AT hook-like / IPR000116 High mobility group, HMG-I/HMG-Y / IPR011991 Winged helix-turn-helix DNA-binding domain
AT5G66052	16.8167	24.9	0.203333	0.04	0.0433333	0.0633333	0.06	0.0466667	23.3367	27.8767	0.000261245	1	1
AT4G37553	4.98333	5.21	6.89667	8.91333	0.59	3.22333	0.753333	1.80667	1.59333	3.01667	0.000263994	1	1
AT1G49740	11.1067	11.4233	4.08333	4.01	7.49667	9.37333	5.66667	5.54	16.2533	11.53	0.000264983	1	1		IPR017946 PLC-like phosphodiesterase, TIM beta/alpha-barrel domain / IPR000909 Phospholipase C, phosphatidylinositol-specific , X domain
AT3G21630	10.89	20.3867	2.34667	2.73667	2.56	2.17667	4.05667	3.22667	2.52	3.57667	0.000265454	1	1	PF00069 Protein kinase domain / PF01476 LysM domain / PF07714 Protein tyrosine kinase / PF01034 Syndecan domain	IPR000719 Protein kinase, catalytic domain / IPR018392 Peptidoglycan-binding lysin domain / IPR008271 Serine/threonine-protein kinase, active site / IPR013320 Concanavalin A-like lectin/glucanase, subgroup / IPR011009 Protein kinase-like domain / IPR001245 Serine-threonine/tyrosine-protein kinase catalytic domain / IPR017441 Protein kinase, ATP binding site / IPR027789 Syndecan/Neurexin domain
AT1G09830	20.0333	18.81	27.3967	18.9333	13.6767	9.86333	15.7433	8.35333	15.9067	11.2	0.000271699	0.0456524	1	PF01071 Phosphoribosylglycinamide synthetase, ATP-grasp (A) domain / PF02843 Phosphoribosylglycinamide synthetase, C domain / PF02844 Phosphoribosylglycinamide synthetase, N domain	IPR020560 Phosphoribosylglycinamide synthetase, C-domain / IPR020562 Phosphoribosylglycinamide synthetase, N-terminal / IPR020561 Phosphoribosylglycinamide synthetase, ATP-grasp (A) domain / IPR020559 Phosphoribosylglycinamide synthetase, conserved site / IPR000115 Phosphoribosylglycinamide synthetase / IPR011761 ATP-grasp fold / IPR016185 Pre-ATP-grasp domain / IPR013815 ATP-grasp fold, subdomai…
AT5G03300	65.5433	57.8133	70.2733	59.4	34.0633	29.9133	59.7633	48.1333	77.4667	63.5467	0.00027345	1	1	PF00294 pfkB family carbohydrate kinase	IPR011611 Carbohydrate kinase PfkB / IPR002173 Carbohydrate/puine kinase, PfkB, conserved site / IPR001805 Adenosine kinase
AT1G10160	2.08333	2.28	0.0466667	0	0	0	0	0.00666667	0	0	0.000279245	1	1
AT4G33400	3.09667	2.44667	0.93	0.386667	0.833333	0.346667	2.54333	1.35667	1.15667	0.463333	0.000279685	1	1	PF08553 VID27 cytoplasmic protein	IPR013863 Vacuolar import/degradation, Vid27-related / IPR015943 WD40/YVTN repeat-like-containing domain
AT5G64685	0.25	0.176667	0.246667	0.413333	1.31	1.63667	2.86667	3.39333	2.74667	4.49333	0.000286712	1	1
AT3G44680	6.51333	7.69	2.85333	3.18333	3.10333	3.11	3.52	2.99	3.68	6.26333	0.000288062	1	1	PF00850 Histone deacetylase domain / PF00850 Histone deacetylase domain	IPR023801 Histone deacetylase domain / IPR003084 Histone deacetylase / IPR000286 Histone deacetylase superfamily
AT1G64350	10.24	9.49333	10.7667	14.8833	6.90667	9.24667	14.6	12.9333	10.9767	19.54	0.000290857	0.403925	0.0906669	PF00400 WD domain, G-beta repeat 893-931 938-975 1109-1147 1194-1232 1236-1273 1277-1315 1319-1357 1361-1399 / PF00400 WD domain, G-beta repeat 893-931 938-975 1109-1147 1194-1232 1236-1273 1277-1315 1319-1357 1361-1399	IPR001680 WD40 repeat / IPR015943 WD40/YVTN repeat-like-containing domain / IPR017986 WD40-repeat-containing domain
AT1G51360	10.22	9.97333	7.31	13.2833	1.54667	2.70333	11.3467	13.39	6.37333	7.75667	0.000291679	1	1	PF07876 Stress responsive A/B Barrel Domain / PF07876 Stress responsive A/B Barrel Domain	IPR013097 Stress responsive alpha-beta barrel / IPR011008 Dimeric alpha-beta barrel
AT5G05430	0	0	0	0	1.02333	0.37	1.25667	0.31	0	0	0.000292384	1	1
AT3G43310	0	0.0466667	0.633333	0.583333	1.52	1.48	0.966667	0.863333	3.44667	2.73333	0.000292574	1	1
AT5G63080	6.94333	10.8533	2.05333	4.46	7.66333	9.57333	9.84333	11.8867	3.34333	8.46	0.00029294	0.0331758	1	PF13621 Cupin-like domain	IPR003347 JmjC domain
AT5G52070	5.38667	3.72667	9.07333	6.04667	9.46667	5.35667	10.4733	4.44333	11.5233	18.5533	0.000295602	1	0.295942	PF05641 Agenet domain	IPR008395 Agenet-like domain / IPR014002 Tudor-like, plant
AT2G35410	95.36	87.91	74.0067	54.0967	68.0533	51.2633	119.283	90.3367	103.31	41.6567	0.000301786	0.000332868	1	PF00076 RNA recognition motif. (a.k.a. RRM, RBD, or RNP domain) / PF14259 RNA recognition motif (a.k.a. RRM, RBD, or RNP domain)	IPR000504 RNA recognition motif domain / IPR012677 Nucleotide-binding, alpha-beta plait
AT4G14970	0.31	0.426667	0.47	0.303333	0.146667	0.07	0.48	0.23	1.15	0.72	0.000302439	1	1	PF14631 Fanconi anaemia protein FancD2 nuclease / PF14631 Fanconi anaemia protein FancD2 nuclease
AT4G29330	17.3567	26.03	15.8533	28	21.8733	30.6767	20.4867	26.3567	21.2433	48.8867	0.000302807	8.01734e-08	0.0174669	PF04511 Der1-like family	IPR007599 Derlin
AT5G23770	0.543333	1.00667	0.75	0.74	3.19	2.70667	1.46667	1.22333	1.22333	1.54667	0.00030363	1	1	PF05266 Protein of unknown function (DUF724) / PF05641 Agenet domain	IPR007930 Protein of unknown function DUF724 / IPR008395 Agenet-like domain / IPR014002 Tudor-like, plant
AT5G58590	21.0567	22.9233	22.5033	35.3733	18.37	32.2133	24.4933	27.2933	33.2467	80.9433	0.000305174	0.0144805	0.270461	PF00638 RanBP1 domain	IPR000156 Ran binding domain / IPR011993 Pleckstrin homology-like domain
AT1G12860	13.83	12.6133	16.3333	13.3967	7.82	6.16333	6.63	6.27333	7.92333	2.93333	0.000306695	1	1	PF00010 Helix-loop-helix DNA-binding domain	IPR011598 Myc-type, basic helix-loop-helix (bHLH) domain
AT1G20225	25.0767	37.5333	7.66667	15.03	8.13333	17.45	11.3033	19.1267	9.40333	25.7767	0.0003067	0.000807147	1	PF13462 Thioredoxin	IPR012336 Thioredoxin-like fold
AT2G46440	39.22	78.5233	46.0367	86.3567	37.2367	60.7667	0.326667	0.0966667	69.84	134.617	0.000308486	0.200896	1	PF00027 Cyclic nucleotide-binding domain / PF00520 Ion transport protein / PF00520 Ion transport protein	IPR000595 Cyclic nucleotide-binding domain / IPR005821 Ion transport domain / IPR018490 Cyclic nucleotide-binding-like / IPR014710 RmlC-like jelly roll fold
AT4G10130	3.76	4.27667	4.06	4.76667	0.653333	0.586667	0.203333	0.413333	3.63333	5.02	0.000308685	1	1	PF00226 DnaJ domain / PF05207 CSL zinc finger	IPR001623 DnaJ domain / IPR007872 Zinc finger, DPH-type
AT4G06534	2.65	4.27667	0.07	0.133333	0.0633333	0.226667	0.146667	0.733333	0	0.28	0.000309238	1	1
AT1G71500	245.813	154.7	177.12	110.503	145.413	104.15	328.583	201.877	163.723	68.73	0.000311967	0.000703302	1	PF13806 Rieske-like [2Fe-2S] domain	IPR017941 Rieske [2Fe-2S] iron-sulphur domain
AT4G08520	40.5233	48.9867	25.5933	30.7867	22.39	23.9833	43.57	49.9833	22.5033	36.6933	0.00031492	1	1	PF01217 Clathrin adaptor complex small chain	IPR022775 AP complex, mu/sigma subunit / IPR011012 Longin-like domain
AT3G27530	11.1667	16.2633	6.28667	8.6	6.8	7.26	7.05	7.33	5.77667	9.78667	0.000318882	0.489489	1	PF04869 Uso1 / p115 like vesicle tethering protein, head region / PF04871 Uso1 / p115 like vesicle tethering protein, C terminal region / PF04869 Uso1 / p115 like vesicle tethering protein, head region	IPR006953 Vesicle tethering protein Uso1/P115-like , head domain / IPR006955 Uso1/p115-like vesicle tethering protein, C-terminal / IPR016024 Armadillo-type fold / IPR024095 Vesicle tethering protein p115-like
AT3G54160	0.263333	0.463333	1.75667	2.38	1.71	1.87	0.61	0.553333	2.45333	2.67667	0.000322142	1	1	PF07723 Leucine Rich Repeat	IPR013101 Leucine-rich repeat 2 / IPR006566 FBD
AT1G78150	33.14	40.9767	35.3533	58.8533	43.97	58.4433	38.74	50.6467	41.7067	79.9933	0.000322985	1.64992e-07	0.117298	PF13266 Protein of unknown function (DUF4057)	IPR025131 Domain of unknown function DUF4057
AT4G27300	16.6533	34.8	20.6167	36.2267	26.59	52.1467	27.3	27.5733	45.35	137.79	0.000326679	0.0188521	0.350018	PF00954 S-locus glycoprotein family / PF01453 D-mannose binding lectin / PF07714 Protein tyrosine kinase / PF08276 PAN-like domain	IPR013227 PAN-2 domain / IPR001245 Serine-threonine/tyrosine-protein kinase catalytic domain / IPR001480 Bulb-type lectin domain / IPR000858 S-locus glycoprotein / IPR000719 Protein kinase, catalytic domain / IPR003609 Apple-like / IPR013320 Concanavalin A-like lectin/glucanase, subgroup / IPR011009 Protein kinase-like domain / IPR002290 Serine/threonine- / dual specificity protein kinase, cataly…
AT4G31560	81.74	59.51	78.4567	72.9933	79.0867	76.97	38.3333	39.2067	43.5267	42.5767	0.000328446	1	1
AT5G47930	160.423	89.23	146.54	101.43	152.577	105.93	156.79	88.8533	46.2267	59.8833	0.000328783	0.000780578	1	PF01667 Ribosomal protein S27	IPR000592 Ribosomal protein S27e / IPR011332 Ribosomal protein, zinc-binding domain / IPR023407 Ribosomal protein S27e, zinc-binding domain
AT2G31110	9.58	13.6833	11.5267	21.6433	7.35333	24.6833	12.4467	12.0367	14.56	62.4	0.00032922	0.000312096	0.00411027	PF14416 PMR5 N terminal Domain / PF13839 GDSL/SGNH-like Acyl-Esterase family found in Pmr5 and Cas1p	IPR025846 PMR5 N-terminal domain / IPR026057 PC-Esterase
AT1G71090	14.7467	17.7433	8.01	9.09667	13.87	21.5167	16.59	17.96	8.44667	11.33	0.000329974	1	1	PF03547 Membrane transport protein	IPR004776 Auxin efflux carrier
AT1G50570	17.9633	35.3033	20.3533	38.2233	25.3067	34.4533	8.82	12.47	20.5367	47.1233	0.000332115	2.367e-05	1	PF00168 C2 domain	IPR000008 C2 calcium-dependent membrane targeting / IPR008973 C2 calcium/lipid-binding domain, CaLB
AT1G33040	55.1867	34.6367	25.77	20.0367	27.47	20.5467	53.55	45.2933	60.2467	45.7467	0.000335806	1	1	PF01849 NAC domain	IPR002715 Nascent polypeptide-associated complex NAC domain / IPR016641 Nascent polypeptide-associated complex subunit alpha
AT4G01850	128.19	117.143	117.89	119.08	176.697	180.773	108.823	95.31	157.253	140.153	0.000340275	1	1	PF00438 S-adenosylmethionine synthetase, N-terminal domain / PF02773 S-adenosylmethionine synthetase, C-terminal domain / PF02772 S-adenosylmethionine synthetase, central domain	IPR022628 S-adenosylmethionine synthetase, N-terminal / IPR022630 S-adenosylmethionine synthetase, C-terminal / IPR022629 S-adenosylmethionine synthetase, central domain / IPR022631 S-adenosylmethionine synthetase, conserved site / IPR002133 S-adenosylmethionine synthetase / IPR022636 S-adenosylmethionine synthetase superfamily
AT3G45095	0.0733333	0.143333	0.173333	0.27	0.47	0.453333	0.68	0.886667	0.08	0.176667	0.000344022	1	1
AT5G65880	10.52	5.89333	10.4733	10.6967	1.20667	0.966667	1.52	2.11	14.7367	16.1033	0.000344253	1	1
AT1G73670	17.79	21.9867	13.11	10.3233	7.44667	7.90333	26.2567	18.56	9.38333	11.0633	0.00034718	1	1	PF00069 Protein kinase domain	IPR000719 Protein kinase, catalytic domain / IPR002290 Serine/threonine- / dual specificity protein kinase, catalytic domain / IPR020635 Tyrosine-protein kinase, catalytic domain / IPR011009 Protein kinase-like domain / IPR017441 Protein kinase, ATP binding site / IPR003527 Mitogen-activated protein (MAP) kinase, conserved site
AT5G03940	64.2467	66.35	87.0667	83.7967	114.847	139.003	82.97	95.5567	97.1433	57.9267	0.000348144	1	1	PF00448 SRP54-type protein, GTPase domain / PF02881 SRP54-type protein, helical bundle domain / PF02978 Signal peptide binding domain	IPR000897 Signal recognition particle, SRP54 subunit, GTPase domain / IPR013822 Signal recognition particle, SRP54 subunit, helical bundle / IPR004125 Signal recognition particle, SRP54 subunit, M-domain / IPR022941 Signal recognition particle, SRP54 subunit / IPR003593 AAA+ ATPase domain / IPR027417 P-loop containing nucleoside triphosphate hydrolase / IPR004780 Signal recognition particle prote…
AT2G15310	3.9	7.52333	0.323333	1.18667	0.443333	3.85667	0.573333	0.623333	0.25	3.39667	0.00034836	0.0244376	1	PF00025 ADP-ribosylation factor family	IPR006689 Small GTPase superfamily, ARF/SAR type / IPR005225 Small GTP-binding protein domain / IPR024156 Small GTPase superfamily, ARF type / IPR006687 Small GTPase superfamily, SAR1-type / IPR003579 Small GTPase superfamily, Rab type / IPR027417 P-loop containing nucleoside triphosphate hydrolase
AT4G16680	1.10333	1.17333	1.97667	2.08667	0.636667	0.383333	0.356667	0.423333	2.67333	1.75	0.000350968	1	1	PF13401 AAA domain / PF00271 Helicase conserved C-terminal domain / PF00270 DEAD/DEAH box helicase	IPR001650 Helicase, C-terminal / IPR011545 DNA/RNA helicase, DEAD/DEAH box type, N-terminal / IPR014001 Helicase, superfamily 1/2, ATP-binding domain / IPR003593 AAA+ ATPase domain / IPR027417 P-loop containing nucleoside triphosphate hydrolase / IPR002464 DNA/RNA helicase, ATP-dependent, DEAH-box type, conserved site
AT1G67710	1.27667	3.02	0.97	1.59667	1.13667	1.90333	0.323333	1.25667	2.55	3.51	0.000351509	0.00748992	1	PF00072 Response regulator receiver domain / PF00249 Myb-like DNA-binding domain	IPR001005 SANT/Myb domain / IPR001789 Signal transduction response regulator, receiver domain / IPR006447 Myb domain, plants / IPR017053 Response regulator, plant B-type / IPR009057 Homeodomain-like / IPR011006 CheY-like superfamily
AT2G04080	13.65	24.72	20.5133	34.4433	43.6733	42.8233	25.2133	30.79	10.4733	18.1767	0.000353728	1	1	PF01554 MatE / PF01554 MatE	IPR002528 Multi antimicrobial extrusion protein
AT1G23220	17.7833	18.1367	8.50333	8.32667	11.39	12.33	12.8333	16.15	16.5533	30.5367	0.000354329	1	1	PF01221 Dynein light chain type 1	IPR001372 Dynein light chain, type 1/2
AT5G22875	26.9167	28.61	5.47333	6.82333	13.0667	13.4333	11.6667	15.53	12.58	19.4433	0.00035498	1	1
AT4G07507	3.31333	6.34667	0	0	0	0	0	0	0	0.0333333	0.000357078	1	1
AT5G36790	195.75	215.823	311.797	180.657	240.803	196.79	331.23	200.283	42.1433	18.32	0.000357248	1	1	PF13242 HAD-hyrolase-like / PF13344 Haloacid dehalogenase-like hydrolase	IPR023214 HAD-like domain / IPR023215 Nitrophenylphosphatase-like domain / IPR006349 2-phosphoglycolate phosphatase, eukaryotic / IPR006357 HAD-superfamily hydrolase, subfamily IIA
AT1G01670	1.46	1.8	2.82667	4.47333	3.96	4.27667	2.33	2.81	3.08333	7.48333	0.000359094	0.0506413	0.613942	PF04564 U-box domain	IPR003613 U box domain / IPR014729 Rossmann-like alpha/beta/alpha sandwich fold / IPR013083 Zinc finger, RING/FYVE/PHD-type
AT3G32940	7.02667	9.90333	11.2833	15.6	11.86	12.73	3.11667	2.47	11.21	14.0133	0.000359503	1	1	PF00013 KH domain	IPR004088 K Homology domain, type 1
AT2G34260	6.62333	5.1	8.35	4.76667	7.52333	4.86333	9.3	4.70333	10.8533	20.1833	0.000365063	1	0.131095	PF00400 WD domain, G-beta repeat 893-931 938-975 1109-1147 1194-1232 1236-1273 1277-1315 1319-1357 1361-1399 / PF00400 WD domain, G-beta repeat 893-931 938-975 1109-1147 1194-1232 1236-1273 1277-1315 1319-1357 1361-1399 / PF00400 WD domain, G-beta repeat 893-931 938-975 1109-1147 1194-1232 1236-1273 1277-1315 1319-1357 1361-1399 / PF00400 WD domain, G-beta repeat 893-931 938-975 1109-1147 1194-12…	IPR001680 WD40 repeat / IPR015943 WD40/YVTN repeat-like-containing domain / IPR017422 WD repeat protein 55 / IPR019775 WD40 repeat, conserved site / IPR017986 WD40-repeat-containing domain
AT1G67740	1607.72	1082.79	1008.99	635.447	1526.71	1093.8	928.163	733.14	1420.16	743.083	0.000375083	1.0106e-05	1	PF06298 Photosystem II protein Y (PsbY) / PF06298 Photosystem II protein Y (PsbY)	IPR009388 Photosystem II PsbY
AT2G14285	22.1933	16.0233	7.76667	10.7767	7.77	10.3233	6.75667	8.94667	0.233333	0.0966667	0.000376767	1	1	PF01423 LSM domain	IPR001163 Ribonucleoprotein LSM domain / IPR010920 Like-Sm (LSM) domain / IPR006649 Ribonucleoprotein LSM domain, eukaryotic/archaea-type / IPR016487 Small nuclear ribonucleoprotein SmF
AT1G71020	10.51	9.89667	4.44667	2.28667	3.67667	2.37667	4.21	3.24	3.59	2.04333	0.000377691	1	1	PF05804 Kinesin-associated protein (KAP) / PF04564 U-box domain / PF00514 Armadillo/beta-catenin-like repeat / PF00514 Armadillo/beta-catenin-like repeat / PF00514 Armadillo/beta-catenin-like repeat	IPR003613 U box domain / IPR000225 Armadillo / IPR011989 Armadillo-like helical / IPR013083 Zinc finger, RING/FYVE/PHD-type / IPR016024 Armadillo-type fold
AT1G44770	30.2833	40.9467	10.7067	16.7067	14.2467	17.11	16.66	19.4333	29.9633	68.09	0.00038022	1	1
AT2G17630	2.72667	2.15	1.80667	1.78	2.71333	2.26	4.39333	3.47	6.72667	5.44	0.000380368	1	1	PF00266 Aminotransferase class-V	IPR000192 Aminotransferase, class V/Cysteine desulfurase / IPR003248 Phosphoserine aminotransferase, subgroup / IPR022278 Phosphoserine aminotransferase / IPR015424 Pyridoxal phosphate-dependent transferase / IPR020578 Aminotransferase class-V pyridoxal-phosphate binding site / IPR015421 Pyridoxal phosphate-dependent transferase, major region, subdomain 1 / IPR015422 Pyridoxal phosphate-dependent…
AT5G44100	24.24	38.3367	28.7767	36.05	37.8633	33.94	16.95	16.57	30.11	41.63	0.000384366	1	1	PF00069 Protein kinase domain / PF00069 Protein kinase domain	IPR000719 Protein kinase, catalytic domain / IPR017441 Protein kinase, ATP binding site / IPR008271 Serine/threonine-protein kinase, active site / IPR011009 Protein kinase-like domain / IPR002290 Serine/threonine- / dual specificity protein kinase, catalytic domain / IPR020635 Tyrosine-protein kinase, catalytic domain
AT4G02920	199.477	191.07	73.5867	53.3533	48.92	51.4967	268.347	191.15	107.973	80.5533	0.000386028	1	1
AT2G45630	7.56	8.73333	13.82	12.0767	17.89	12.95	15.3133	11.0633	6.35	6.71667	0.000386229	1	1	PF00389 D-isomer specific 2-hydroxyacid dehydrogenase, catalytic domain	IPR006139 D-isomer specific 2-hydroxyacid dehydrogenase, catalytic domain / IPR016040 NAD(P)-binding domain
AT1G71330	1.65667	1.00333	0.766667	1.70333	0.95	1.26333	0.75	1.11333	3.84	4.99	0.000386571	1	1	PF00005 ABC transporter / PF00005 ABC transporter	IPR003439 ABC transporter-like / IPR017940 ABC transporter, integral membrane type 1 / IPR027417 P-loop containing nucleoside triphosphate hydrolase / IPR011527 ABC transporter, transmembrane domain, type 1
AT4G20010	16.6467	14.5967	8.28667	9.42	16.2633	12.0967	20.6933	13.9167	19.34	25.8067	0.000387796	1	1		IPR000424 Primosome PriB/single-strand DNA-binding / IPR012340 Nucleic acid-binding, OB-fold
AT2G17900	2.04	1.25667	0.84	0.39	0.863333	0.753333	2.75333	2.29333	1.43667	1.3	0.000387853	1	1	PF00856 SET domain / PF01753 MYND finger	IPR001214 SET domain / IPR002893 Zinc finger, MYND-type
AT1G47565	1.14333	2.56333	1.72667	2.4	1.59333	3.44	0	0.0266667	0.743333	1.4	0.000387857	0.161392	1
AT1G62800	6.29667	6.65	18.5133	9.70333	12.22	11.72	6.55333	4.19333	8.89667	4.90667	0.000391799	1	1	PF00155 Aminotransferase class I and II	IPR004839 Aminotransferase, class I/classII / IPR004838 Aminotransferases, class-I, pyridoxal-phosphate-binding site / IPR000796 Aspartate/other aminotransferase / IPR015421 Pyridoxal phosphate-dependent transferase, major region, subdomain 1 / IPR015424 Pyridoxal phosphate-dependent transferase
AT1G04590	10.9567	9.41333	5.19667	4.78667	11.3167	9.15333	14.0767	12.91	15.0833	16.9567	0.000392398	1	1
AT1G65370	18.0667	18.9967	21.02	31.6733	14.7433	16.8633	1.37	1.03333	24.3467	80.69	0.000395326	1	0.453515	PF00917 MATH domain	IPR002083 MATH / IPR008974 TRAF-like
AT1G25380	12.1367	12.3067	6.85	7.58667	16.14	13.8267	12.8633	13.52	7.92667	7.90333	0.000402176	1	1	PF00153 Mitochondrial carrier protein / PF00153 Mitochondrial carrier protein / PF00153 Mitochondrial carrier protein	IPR018108 Mitochondrial substrate/solute carrier / IPR002067 Mitochondrial carrier protein / IPR023395 Mitochondrial carrier domain
AT5G25752	16.3933	20.9767	18.31	22.6467	20.1933	24.7867	21.1833	25.45	11.0233	13.29	0.000402428	0.282981	1	PF01694 Rhomboid family	IPR022764 Peptidase S54, rhomboid domain / IPR002610 Peptidase S54, rhomboid
AT5G40250	6.47333	9.7	8.3	9.55333	7.89333	8.49667	6.7	6.73667	12.9867	17.08	0.000402753	1	1	PF13639 Ring finger domain	IPR001841 Zinc finger, RING-type / IPR013083 Zinc finger, RING/FYVE/PHD-type
AT3G26790	0.21	0.846667	0.233333	2.45	0.286667	1.17667	0	0.08	0	0.02	0.000403005	0.000495478	0.0132861	PF02362 B3 DNA binding domain / PF02362 B3 DNA binding domain	IPR003340 B3 DNA binding domain / IPR015300 DNA-binding pseudobarrel domain
AT4G16447	3.71667	3.58333	0.07	0.22	0.0633333	0.35	2.26333	3.76	4.65333	13.5933	0.000403026	1	1
AT1G31710	5.11	4.66333	4.64333	1.62333	4.15333	0.77	1.98	1.04	1.63	2.02667	0.000406119	0.0184564	0.75098	PF01179 Copper amine oxidase, enzyme domain / PF02727 Copper amine oxidase, N2 domain / PF02728 Copper amine oxidase, N3 domain	IPR015798 Copper amine oxidase, C-terminal / IPR015800 Copper amine oxidase, N2-terminal / IPR015802 Copper amine oxidase, N3-terminal / IPR015801 Copper amine oxidase, N2/N3-terminal / IPR000269 Copper amine oxidase / IPR016182 Copper amine oxidase, N-terminal
AT3G12040	2.92667	4.91667	0.79	2.7	4.51667	5.26333	3.78	4.43333	3.76333	15.3133	0.000409894	0.0076451	0.0150243	PF02245 Methylpurine-DNA glycosylase (MPG)	IPR003180 Methylpurine-DNA glycosylase (MPG) / IPR011034 Formyl transferase, C-terminal-like
AT2G17920	0	0	0	0	0	0	1.35667	1.19	0	0.03	0.000410878	1	1	PF14111 Domain of unknown function (DUF4283) / PF14392 Zinc knuckle	IPR025558 Domain of unknown function DUF4283 / IPR025836 Zinc knuckle CX2CX4HX4C
AT5G64680	7.93	9.23667	7.19667	10.0333	10.3	12.18	9.6	10.9833	11.3	27.2767	0.000411811	0.0365771	0.0907618
AT2G37620	13.1267	10.6733	20.59	12.6933	33.0433	15.7133	14.6133	14.73	24.0267	11.9733	0.000412709	1.95126e-05	0.0365644	PF00022 Actin	IPR004000 Actin-related protein / IPR004001 Actin, conserved site / IPR020902 Actin/actin-like conserved site
AT1G54990	11.8933	23.65	13.8533	25.55	13.6667	21.4067	13.41	19.05	21.6367	53.6833	0.000413001	0.000107047	1	PF12697 Alpha/beta hydrolase family
AT1G01920	4.40667	4.71333	3.8	5.37667	5.48667	4.73667	6.4	5.37333	5.93	12.2467	0.000413225	1	0.0188222	PF00856 SET domain	IPR001214 SET domain
AT2G15280	13.89	12.55	3.51333	4.89333	9.42	12.43	4.06667	4.65	5.26333	8.01333	0.000413239	1	1	PF02453 Reticulon	IPR003388 Reticulon
AT1G54310	8.22	7.98667	9.78	9.79	10.1767	9.34	9.13667	8.4	3.84667	3.46333	0.000414087	1	1		IPR002478 Pseudouridine synthase/archaeosine transglycosylase / IPR015947 PUA-like domain
AT4G01590	22.6367	20.6233	22.1267	16.4	24.02	20.9867	5.78	5.48	27.55	33.81	0.000417754	1	1	PF11705 DNA-directed RNA polymerase III subunit Rpc31 / PF11705 DNA-directed RNA polymerase III subunit Rpc31	IPR024661 DNA-directed RNA polymerase III, subunit Rpc31
AT2G44450	0.06	0.526667	0.0733333	0.273333	1.18	1.56667	0.363333	0.646667	0.1	0.226667	0.000418788	1	1	PF00232 Glycosyl hydrolase family 1	IPR001360 Glycoside hydrolase, family 1 / IPR018120 Glycoside hydrolase, family 1, active site / IPR017853 Glycoside hydrolase, superfamily / IPR013781 Glycoside hydrolase, catalytic domain
AT4G36710	4.51	7.43667	2.41667	3.28667	1.99333	2.12	1.81	2.87	3.29	3.41333	0.000421629	1	1	PF03514 GRAS domain family	IPR005202 Transcription factor GRAS
AT2G27450	36.5367	42.8033	21.1267	28.5133	21.1233	29.7933	36.4933	44.6567	26.32	31.9733	0.000424783	0.165508	1	PF00795 Carbon-nitrogen hydrolase	IPR003010 Carbon-nitrogen hydrolase / IPR017755 N-carbamoylputrescine amidase
AT2G37600	64.5567	28.3067	54.9133	38.4567	60.33	39.6433	68.4033	41.1433	72.0367	110.947	0.000428209	1	0.0269391	PF01158 Ribosomal protein L36e	IPR000509 Ribosomal protein L36e
AT1G31835	3.95	1.32667	0	0.04	0	0	0	0	0	0	0.000428644	1	1
AT3G03560	10.7567	21.83	13.5567	27.31	17.5933	21.1033	13.6067	14.91	17.9533	53.78	0.000429866	0.000114785	0.0155975
AT2G06040	2.08667	2.57667	0.353333	0.17	0.263333	0.24	0.86	0.47	3.28667	2.15667	0.000430459	1	1
AT4G35220	15.2267	26.5333	17.8767	33.8733	18.55	30.1733	15.6333	25.6667	22.0033	46.84	0.000431065	7.59682e-09	1	PF04199 Putative cyclase	IPR007325 Putative cyclase
AT1G34220	10.8633	17.5367	5.84333	7.17667	17.83	15.7867	6.85	6.39333	6.14333	7.22667	0.000433185	1	1	PF03398 Eukaryotic protein of unknown function, DUF292	IPR005061 Domain of unknown function DUF292, eukaryotic
AT3G25010	9.31333	29.45	0.44	1.39	0.223333	0.293333	0.28	0.123333	0.423333	0.436667	0.000433737	1	1	PF00560 Leucine Rich Repeat 17-38 40-61 / PF00560 Leucine Rich Repeat 17-38 40-61 / PF12799 Leucine Rich repeats (2 copies) / PF13855 Leucine rich repeat / PF13855 Leucine rich repeat / PF13855 Leucine rich repeat / PF13855 Leucine rich repeat	IPR001611 Leucine-rich repeat / IPR025875 Leucine rich repeat 4 / IPR003591 Leucine-rich repeat, typical subtype
AT3G52930	128.057	110.227	73.48	70.3	72.7633	74.57	102.37	96.7433	59.6967	63.1967	0.00044395	1	1	PF00274 Fructose-bisphosphate aldolase class-I	IPR000741 Fructose-bisphosphate aldolase, class-I / IPR013785 Aldolase-type TIM barrel
AT3G06200	12.6	11.43	10.4867	10.64	10.8533	10.27	12.3567	9.40667	23.2867	23.3867	0.000444821	1	1	PF00625 Guanylate kinase / PF00625 Guanylate kinase	IPR008144 Guanylate kinase / IPR008145 Guanylate kinase/L-type calcium channel / IPR027417 P-loop containing nucleoside triphosphate hydrolase / IPR017665 Guanylate kinase, sub-group / IPR020590 Guanylate kinase, conserved site
AT5G01970	5.17667	9.30667	2.61	3.57	3.03333	3.02333	3.62	6.49	3.22667	5.7	0.000449334	0.00544429	1
AT1G13320	19.5267	20.4867	21.14	23.4967	12.9	12.34	24.0067	22.7933	10.88	14.5867	0.000454587	1	1	PF13513 HEAT-like repeat / PF13646 HEAT repeats / PF02985 HEAT repeat 296-333 / PF02985 HEAT repeat 296-333	IPR000357 HEAT / IPR021133 HEAT, type 2 / IPR011989 Armadillo-like helical / IPR016024 Armadillo-type fold
AT3G22410	1.50333	3.19333	6.78	7.15667	2.40667	3.28	3.31333	4.23	0.943333	3.53	0.000454675	1	1	PF00650 CRAL/TRIO domain / PF00650 CRAL/TRIO domain	IPR001251 CRAL-TRIO domain / IPR011074 CRAL/TRIO, N-terminal domain
AT4G37980	96.1833	125.813	188.463	311.93	116.697	255.333	108.243	198.783	158.17	187.333	0.000454716	4.93991e-05	1	PF00107 Zinc-binding dehydrogenase / PF08240 Alcohol dehydrogenase GroES-like domain	IPR013149 Alcohol dehydrogenase, C-terminal / IPR013154 Alcohol dehydrogenase GroES-like / IPR002085 Alcohol dehydrogenase superfamily, zinc-type / IPR011032 GroES-like / IPR016040 NAD(P)-binding domain / IPR020843 Polyketide synthase, enoylreductase / IPR002328 Alcohol dehydrogenase, zinc-type, conserved site
AT5G28040	8.39333	14.2767	5.89667	7.84333	6.08333	7.04	3.73	4.82	3.46	6.83	0.00046421	0.120033	1	PF04504 Protein of unknown function, DUF573	IPR007592 Protein of unknown function DUF573
AT1G72930	259.307	309.403	284.03	412.5	188.393	278.333	210.703	232.333	364.5	1204.4	0.000467362	0.135416	0.0641789	PF01582 TIR domain	IPR000157 Toll/interleukin-1 receptor homology (TIR) domain
AT3G02900	39.1333	21.3767	23.0633	9.34667	29.8567	22.1267	20.2833	13.8733	32.16	29.67	0.000468405	0.000860442	1
AT1G23850	0.95	1.24667	1.15333	1.43333	16.48	8.95667	12.84	3.86667	7.97	21.56	0.000468695	1	0.116037
AT1G56290	4.22333	5.62667	2.05333	3.07333	2.04	2.41667	2.23333	2.77	2.33333	3.85667	0.000471251	0.356586	1	PF04676 Protein similar to CwfJ C-terminus 2 / PF04677 Protein similar to CwfJ C-terminus 1	IPR006768 Cwf19-like, C-terminal domain-1 / IPR006767 Cwf19-like protein, C-terminal domain-2 / IPR011146 HIT-like domain
AT1G77230	5.61667	5.55333	4.91667	8.25	10.54	10.52	9.69333	7.29667	12.55	18.2467	0.000473822	1	1	PF00515 Tetratricopeptide repeat 509-542 543-576 / PF13414 TPR repeat	IPR001440 Tetratricopeptide TPR-1 / IPR019734 Tetratricopeptide repeat / IPR013026 Tetratricopeptide repeat-containing domain / IPR011990 Tetratricopeptide-like helical
AT2G13665	3.66	6.09	0	0	2.37333	2.45	1.23	4.09667	0	0.06	0.000474404	1	1
AT5G37055	6.39667	7.34	0.56	1.05333	4.72333	3.42333	6.85	7.87	6.98	11.8933	0.000476079	1	1	PF04438 HIT zinc finger	IPR007529 Zinc finger, HIT-type
AT5G43450	17.9	18.47	16.8	23.3067	6.02333	7.14	15.1233	14.63	5.83667	10.4567	0.000477125	1	1	PF03171 2OG-Fe(II) oxygenase superfamily / PF14226 non-haem dioxygenase in morphine synthesis N-terminal / PF14226 non-haem dioxygenase in morphine synthesis N-terminal	IPR005123 Oxoglutarate/iron-dependent dioxygenase / IPR027443 Isopenicillin N synthase-like / IPR026992 Non-haem dioxygenase N-terminal domain
AT5G11070	59.3433	52.99	18.02	19.32	56.6433	51.6567	27.8667	34.7533	20.03	10.3067	0.000477323	1	1
AT4G13830	100.633	133.077	19.4633	30.7067	74.1967	110.303	37.02	51.4667	18.6933	22.6	0.000477366	1	1	PF00226 DnaJ domain	IPR001623 DnaJ domain / IPR018253 DnaJ domain, conserved site
AT2G29950	0.56	2.44	0	0.106667	0	0.06	0	0.0433333	0.0433333	0.0833333	0.000478772	1	0.716185	PF07011 Protein of unknown function (DUF1313)	IPR009741 Protein of unknown function DUF1313
AT5G18580	24.2367	26.4	24.84	26.8367	25.04	24.79	26.4767	27.9433	27.18	41.1467	0.000479109	0.0731744	0.0524738	PF13499 EF-hand domain pair	IPR011992 EF-hand-like domain / IPR002048 EF-hand domain / IPR018247 EF-Hand 1, calcium-binding site
AT5G41970	22.1033	18.26	22.4567	19.29	22.52	21.0333	11.56	9.25667	28.77	25.37	0.000481667	1	1	PF03690 Uncharacterised protein family (UPF0160)	IPR003226 Metal-dependent protein hydrolase
AT5G41770	13.3733	15.6433	16.9233	17.1767	17.9233	18.11	9.44	7.46	17.3533	21.8933	0.000482597	1	1	PF02184 HAT (Half-A-TPR) repeat	IPR003107 RNA-processing protein, HAT helix / IPR011990 Tetratricopeptide-like helical / IPR013026 Tetratricopeptide repeat-containing domain
AT5G57840	1.38667	2.12333	1.25333	2.40333	0.85	2.05667	0.87	1.6	0.246667	0.27	0.000487073	0.00510929	1	PF02458 Transferase family	IPR003480 Transferase / IPR023213 Chloramphenicol acetyltransferase-like domain
AT1G43580	10.6667	13.7467	5.88667	5.56	6.28667	6.21	4.67667	5.84	8.98333	12.3967	0.000488061	1	1	PF14360 PAP2 superfamily C-terminal	IPR025749 Sphingomyelin synthase-like domain
AT4G31810	4.15	3.54	2.77667	1.96333	4.12333	2.67	6.09333	3.09	5.26333	9.19667	0.000494549	1	0.121783	PF00378 Enoyl-CoA hydratase/isomerase family / PF13766 2-enoyl-CoA Hydratase C-terminal region	IPR001753 Crotonase superfamily
AT4G11740	11.0133	16.4067	14.6933	19.6033	8.63333	10.2833	17.0433	18.1867	7.95667	13.3467	0.000496245	0.0842234	1	PF00789 UBX domain / PF14555 UBA-like domain	IPR001012 UBX / IPR003903 Ubiquitin interacting motif / IPR009060 UBA-like
AT1G52310	8.50667	13.4367	12.5433	17.8767	10.9933	16.2967	12.09	15.0167	14.4067	30.2133	0.00049978	6.59853e-05	1	PF00059 Lectin C-type domain / PF07714 Protein tyrosine kinase / PF07714 Protein tyrosine kinase / PF00059 Lectin C-type domain	IPR001304 C-type lectin / IPR001245 Serine-threonine/tyrosine-protein kinase catalytic domain / IPR016186 C-type lectin-like / IPR013320 Concanavalin A-like lectin/glucanase, subgroup / IPR011009 Protein kinase-like domain / IPR016187 C-type lectin fold / IPR002290 Serine/threonine- / dual specificity protein kinase, catalytic domain / IPR020635 Tyrosine-protein kinase, catalytic domain / IPR0007…
AT5G17190	36.27	51.2567	8.58333	13.0667	12.0933	14.3767	5.72333	10.6033	2.74	13.9367	0.00050046	1	1	PF05529 B-cell receptor-associated protein 31-like	IPR008417 B-cell receptor-associated 31-like
AT2G06950	4.81667	1.68	0.03	0	0.01	0	0	0.01	0.00666667	0.0166667	0.000501401	1	1
AT4G14965	16.2567	17.6167	16.34	20.2433	2.2	2.09	18.3067	22.7367	17.74	38.7367	0.000505082	1	1	PF00173 Cytochrome b5-like Heme/Steroid binding domain	IPR001199 Cytochrome b5-like heme/steroid binding domain
AT2G01755	21.8367	11.6933	5.04333	3.59333	4.65	4.16333	17.8467	19.5933	4.11	1.34667	0.000508106	1	1
AT5G23330	7.10333	7.67667	7.68667	11.9467	7.52667	10.66	8.47667	9.67667	1.34333	2.82667	0.000510702	1	1	PF06574 FAD synthetase	IPR015864 FAD synthetase / IPR014729 Rossmann-like alpha/beta/alpha sandwich fold
AT3G15060	11.3267	9.22	8.15667	6.50667	10.3533	12.08	7.74	7.4	3.27333	2.24667	0.000516142	1	1	PF00071 Ras family	IPR001806 Small GTPase superfamily / IPR027417 P-loop containing nucleoside triphosphate hydrolase / IPR020849 Small GTPase superfamily, Ras type / IPR003579 Small GTPase superfamily, Rab type / IPR003578 Small GTPase superfamily, Rho type / IPR002041 Ran GTPase / IPR005225 Small GTP-binding protein domain
AT5G03500	9.38667	11.1067	4.00333	6.86	3.45	4.62667	10.46	14.3967	6.43333	9.93333	0.000516287	1	1	PF05983 MED7 protein	IPR009244 Mediator complex, subunit Med7
AT5G43260	36.1733	39.0667	37.6033	36.05	10.3033	12.78	13.8367	13.8167	13.87	14.25	0.000517932	1	1		IPR001305 Heat shock protein DnaJ, cysteine-rich domain
AT4G34920	42.1933	44.88	34.45	33.12	54.8933	33.6967	26.6533	25.0467	32.8267	37.5467	0.000518854	1	0.239908	PF00388 Phosphatidylinositol-specific phospholipase C, X domain	IPR000909 Phospholipase C, phosphatidylinositol-specific , X domain / IPR017946 PLC-like phosphodiesterase, TIM beta/alpha-barrel domain
AT1G80960	2.61333	4.6	0.333333	0.636667	0.39	0.836667	0.343333	0.61	0.343333	0.766667	0.000521455	1	1	PF00646 F-box domain / PF00646 F-box domain	IPR001810 F-box domain, cyclin-like
AT2G32000	7.15667	6.57333	8.00333	7.58333	7.98333	7.32667	12.3933	12.1033	7.53667	4.94	0.000522216	1	1	PF01131 DNA topoisomerase / PF01751 Toprim domain / PF01751 Toprim domain	IPR013497 DNA topoisomerase, type IA, central / IPR006171 Toprim domain / IPR003601 DNA topoisomerase, type IA, domain 2 / IPR023405 DNA topoisomerase, type IA, core domain / IPR013825 DNA topoisomerase, type IA, central region, subdomain 2 / IPR000380 DNA topoisomerase, type IA / IPR003602 DNA topoisomerase, type IA, DNA-binding / IPR013824 DNA topoisomerase, type IA, central region, subdomain 1…
AT1G23120	0.563333	0.786667	4.25	6.32333	0.57	1.36333	1.07	0.67	1.79667	1.31	0.000529144	1	1	PF00407 Pathogenesis-related protein Bet v I family	IPR000916 Bet v I domain / IPR024948 Major latex protein domain / IPR023393 START-like domain
AT3G56820	5.42333	6.16333	6.47667	9.02667	7.68667	8.53333	4.76667	6.03	7.51	13.1867	0.000531725	0.0207799	1
AT5G51450	5.62667	7.16667	5.28667	7.69333	5.29333	7.7	2.94333	3.21667	7.23333	11.82	0.000533097	0.114538	1	PF02845 CUE domain / PF13639 Ring finger domain / PF13639 Ring finger domain	IPR003892 Ubiquitin system component Cue / IPR001841 Zinc finger, RING-type / IPR013083 Zinc finger, RING/FYVE/PHD-type
AT3G44100	90.7533	116.183	66.2067	111.07	53.61	112.423	15.7067	23.41	70.4533	130.937	0.000534324	0.012873	1	PF02221 ML domain	IPR003172 MD-2-related lipid-recognition (ML) domain / IPR014756 Immunoglobulin E-set
AT5G09225	19.7067	19.4133	5.27333	10.2333	7.21333	11.1867	14.2933	33.9133	20.4433	46.3433	0.000536236	0.0752181	1
AT5G37950	0.276667	0.416667	0.663333	2.94	0	0	0	0	0	0.0566667	0.000548245	1	0.539888	PF00201 UDP-glucoronosyl and UDP-glucosyl transferase	IPR002213 UDP-glucuronosyl/UDP-glucosyltransferase
AT4G27595	2.69	4.65667	1.03333	1.06667	0.636667	0.733333	3.38333	3.62667	0.796667	0.496667	0.000550648	1	1	PF05701 Weak chloroplast movement under blue light / PF05701 Weak chloroplast movement under blue light	IPR008545 Protein of unknown function DUF827, plant
AT2G48070	84.59	50.85	76.4933	51.5967	82.9533	52.68	103.037	86.4867	63.0433	29.6967	0.000551998	7.04618e-05	1
AT1G29500	12.2133	8.31	6.90333	11.4	0.113333	0.243333	0.286667	0.363333	0.16	0.2	0.000552807	1	1	PF02519 Auxin responsive protein	IPR003676 Auxin responsive SAUR protein
AT1G11270	1.6	0.93	1.67667	5.03667	2.3	2.03667	2.91	4.01667	0.516667	1.07333	0.000555248	1	0.387732	PF00646 F-box domain / PF07734 F-box associated / PF07734 F-box associated	IPR006527 F-box associated domain, type 1 / IPR001810 F-box domain, cyclin-like / IPR017451 F-box associated interaction domain
AT1G52618	3.92	3.24667	0	0	0.58	0.58	0.82	0.76	1.64	4.68	0.000555334	1	1
AT1G15880	24.5567	30.7	6.99	13.6533	8.63	11.1433	7.75	11.6533	6.48333	16.0567	0.000558001	1	1	PF12352 Snare region anchored in the vesicle membrane C-terminus	IPR023601 Golgi SNAP receptor complex, subunit 1
AT1G73860	0.0833333	0.0866667	0.556667	0.953333	0.243333	0.546667	0.4	0.413333	0.913333	0.603333	0.000560131	1	1	PF00225 Kinesin motor domain	IPR001752 Kinesin, motor domain / IPR027640 Kinesin-like protein / IPR027417 P-loop containing nucleoside triphosphate hydrolase
AT5G20910	7.84	11.2967	8.33333	12.56	11.3633	12.4333	3.79333	4.80667	2.84333	5.72333	0.000560137	1	1	PF13639 Ring finger domain / PF13639 Ring finger domain	IPR001841 Zinc finger, RING-type / IPR013083 Zinc finger, RING/FYVE/PHD-type
AT5G01980	9.41	9.56333	4.91333	5.23667	6.16	5.82333	5.86667	5.02	12.6733	14.6067	0.000570117	1	1	PF13639 Ring finger domain	IPR001841 Zinc finger, RING-type / IPR013083 Zinc finger, RING/FYVE/PHD-type
AT4G28270	28.0933	28.7833	15.9667	40.5267	19.6267	26.9767	30.3433	32.13	35.4867	112.933	0.000573467	0.0393559	0.0395378	PF13923 Zinc finger, C3HC4 type (RING finger) / PF13923 Zinc finger, C3HC4 type (RING finger)	IPR001841 Zinc finger, RING-type / IPR013083 Zinc finger, RING/FYVE/PHD-type / IPR017907 Zinc finger, RING-type, conserved site
AT1G50940	6.33667	14.6967	6.67	17.7967	5.62	7.73333	6.22667	9.59	9.13333	24.56	0.000573713	1.34864e-06	0.209867	PF00766 Electron transfer flavoprotein FAD-binding domain / PF01012 Electron transfer flavoprotein domain	IPR014731 Electron transfer flavoprotein, alpha subunit, C-terminal / IPR014730 Electron transfer flavoprotein, alpha/beta-subunit, N-terminal / IPR001308 Electron transfer flavoprotein, alpha subunit / IPR018206 Electron transfer flavoprotein, alpha subunit, C-terminal, conserved site / IPR014729 Rossmann-like alpha/beta/alpha sandwich fold
AT4G18220	5.39	11.0867	4.8	9.59333	3.50667	12.3067	5.56667	11.21	23.19	26.4267	0.000574757	1	1	PF03151 Triose-phosphate Transporter family	IPR004853 Domain of unknown function DUF250
AT2G01870	15.3333	13.1167	2.51	0.9	1.42333	1.34667	12.0833	13.23	2.70333	1.28667	0.000576005	1	1
AT1G62660	11.3433	5.80667	12.48	7.79	23.3267	12.3867	7.55667	3.97333	10.85	4.18	0.000576245	0.0013407	1	PF08244 Glycosyl hydrolases family 32 C terminal / PF11837 Domain of unknown function (DUF3357) / PF00251 Glycosyl hydrolases family 32 N terminal	IPR013189 Glycosyl hydrolase family 32, C-terminal / IPR021792 Beta-fructofuranosidase / IPR013148 Glycosyl hydrolase family 32, N-terminal / IPR023296 Glycosyl hydrolase, five-bladed beta-propellor domain / IPR018053 Glycoside hydrolase, family 32, active site / IPR008985 Concanavalin A-like lectin/glucanases superfamily / IPR001362 Glycoside hydrolase, family 32
AT1G69540	0.46	0.566667	0.696667	1.46333	0.0466667	0.0666667	0.116667	0.0433333	0.803333	3.10333	0.000578426	1	0.83851	PF00319 SRF-type transcription factor (DNA-binding and dimerisation domain)	IPR002100 Transcription factor, MADS-box
AT1G35660	1.75667	2.87667	1.68333	3.50333	2.15333	3.05	1.52	2.10333	3.06667	6.26667	0.000581641	0.000724893	1
AT4G21110	39.99	43.63	37.9533	52.3267	24.3233	27.1233	24.4133	29.27	51.7467	68.1167	0.00058232	1	1	PF01125 G10 protein	IPR001748 G10 protein / IPR018230 BUD31/G10-related, conserved site
AT2G34470	31.06	43.5667	32.8867	61.3867	32.8467	56.6133	32.3133	55.33	35.9267	94.87	0.000587528	3.86366e-09	0.0121098	PF02492 CobW/HypB/UreG, nucleotide-binding domain	IPR003495 CobW/HypB/UreG domain / IPR004400 Urease accessory protein UreG / IPR012202 [NiFe]-hydrogenase/urease maturation factor, Ni2-binding GTPase / IPR027417 P-loop containing nucleoside triphosphate hydrolase
AT2G41380	2.64333	7.39667	1.73667	6.93333	3.89333	13.4333	2.86333	3.51667	6.14	22.3933	0.000588314	6.48737e-05	0.404236	PF08241 Methyltransferase domain	IPR013216 Methyltransferase type 11
AT1G20610	1.09667	0.803333	4.40333	9.76	7.75	8.73333	1.22	2.85333	6.57	7.67667	0.000590209	1	1	PF02984 Cyclin, C-terminal domain / PF00134 Cyclin, N-terminal domain	IPR004367 Cyclin, C-terminal domain / IPR006671 Cyclin, N-terminal / IPR013763 Cyclin-like / IPR014400 Cyclin A/B/D/E
AT1G10920	3.44	4.78333	7.02333	9.66667	7.95667	8.60667	8.40333	6.27333	8.87	12.36	0.000591445	1	1	PF00931 NB-ARC domain	IPR002182 NB-ARC / IPR000767 Disease resistance protein / IPR027417 P-loop containing nucleoside triphosphate hydrolase
AT5G45410	54.4733	59.8033	53.4533	60.6967	55.2567	58.5233	35.05	39.7567	91.75	103.19	0.000597859	1	1
AT1G53450	5.57333	7.83333	6.92	9.26	4.76333	8.49667	6.36667	8.95	2.96333	2.47333	0.000602631	0.132415	1
AT4G26180	1.81667	3.45333	0.39	0.85	0.556667	0.596667	2.74	3.75333	2.84	4.63333	0.000608487	1	1	PF00153 Mitochondrial carrier protein / PF00153 Mitochondrial carrier protein / PF00153 Mitochondrial carrier protein	IPR018108 Mitochondrial substrate/solute carrier / IPR002067 Mitochondrial carrier protein / IPR002167 Graves disease carrier protein / IPR023395 Mitochondrial carrier domain
AT1G62540	2.14667	5.05333	1.41667	1.92667	0.473333	0.58	0.146667	0.233333	1.33667	2.37667	0.000608531	1	1	PF00743 Flavin-binding monooxygenase-like / PF00743 Flavin-binding monooxygenase-like	IPR020946 Flavin monooxygenase-like / IPR000960 Flavin monooxygenase FMO
AT1G69610	4.12	8.43	0.94	1.64667	4.30333	3.28667	1.89333	1.55	2.19667	4.59	0.000609046	1	1	PF07891 Protein of unknown function (DUF1666)	IPR012870 Protein of unknown function DUF1666 / IPR008195 Ribosomal protein L34Ae
AT2G27590	6.42	6.71333	8.11	8.85667	7.47667	7.35	7.69	6.14333	11.6133	15.0533	0.000610894	1	1
AT5G06510	0.88	6.57667	2.04	16.5633	0.743333	11.89	1.62667	8.08333	1.93333	60.0333	0.000612301	3.16328e-05	0.000991027	PF02045 CCAAT-binding transcription factor (CBF-B/NF-YA) subunit B	IPR001289 CCAAT-binding transcription factor, subunit B / IPR018362 CCAAT-binding factor, conserved site
AT2G23820	18.4533	17.7833	12.2767	12.1433	15.63	10.7667	22.21	19.2867	16.7033	13.0333	0.000618454	1	1	PF13023 HD domain	IPR006674 HD domain / IPR003607 HD/PDEase domain
AT2G17033	13.14	10.5367	10.4433	7.89	9.74333	9.05	9.49667	6.94333	21.9967	12.0267	0.000625985	0.0650225	1	PF01535 PPR repeat 10-34 52-76 94-118 / PF01535 PPR repeat 10-34 52-76 94-118	IPR002885 Pentatricopeptide repeat / IPR002625 Smr protein/MutS2 C-terminal
AT1G09690	277.93	155.127	252.107	174.773	385.397	250.09	268.927	183.677	348.533	517.857	0.00062656	1	0.426366	PF01157 Ribosomal protein L21e	IPR001147 Ribosomal protein L21e / IPR018259 Ribosomal protein L21e, conserved site / IPR008991 Translation protein SH3-like domain
AT5G47210	230.767	160.663	224.12	152.37	229.347	168.07	258.243	158.53	282.5	302.76	0.000635085	0.0020236	1	PF09598 Stm1 / PF04774 Hyaluronan / mRNA binding family	IPR019084 Stm1, N-terminal / IPR006861 Hyaluronan/mRNA-binding protein
AT4G20870	23.1367	14.2467	23.2933	15.5833	19.3167	16.6067	7.81333	5.74	27.05	12.9967	0.000635623	0.00298271	1	PF04116 Fatty acid hydroxylase superfamily	IPR006694 Fatty acid hydroxylase
AT4G25100	637.833	336.107	520.047	270.457	555.907	624.433	216.537	337.377	997.547	347.803	0.000637817	0.00251644	0.000643254	PF00081 Iron/manganese superoxide dismutases, alpha-hairpin domain / PF02777 Iron/manganese superoxide dismutases, C-terminal domain	IPR019831 Manganese/iron superoxide dismutase, N-terminal / IPR019832 Manganese/iron superoxide dismutase, C-terminal / IPR019833 Manganese/iron superoxide dismutase, binding site / IPR001189 Manganese/iron superoxide dismutase
AT4G37120	29.18	43.7033	29.3367	44.6933	20.2533	17.28	38.6533	38.0033	8.39333	15.27	0.000640113	1	1	PF11708 Pre-mRNA splicing Prp18-interacting factor	IPR021715 Pre-mRNA splicing Prp18-interacting factor
AT1G15000	11.9767	9.23667	16.7567	11.3433	21.5567	14.0833	8.32333	7.4	12.73	6.56333	0.000640528	0.0154254	1	PF00450 Serine carboxypeptidase / PF00450 Serine carboxypeptidase	IPR001563 Peptidase S10, serine carboxypeptidase / IPR018202 Peptidase S10, serine carboxypeptidase, active site
AT3G27160	283.9	160.747	168.773	75.9367	176.027	77.5667	172.527	111.407	174.37	53.6933	0.000648957	2.19667e-07	1	PF01165 Ribosomal protein S21	IPR001911 Ribosomal protein S21
AT4G24940	14.19	16.0767	5.65667	6.46	5.72333	6.39333	15.2233	14.3967	8.11333	12.46	0.000656778	1	1	PF00899 ThiF family	IPR000594 UBA/THIF-type NAD/FAD binding fold / IPR016040 NAD(P)-binding domain / IPR009036 Molybdenum cofactor biosynthesis, MoeB
AT3G27930	5.26	7.57333	2.38333	3.31	2.09667	2.52667	8.01667	7.75	5.59333	8.78	0.00066075	1	1
AT1G73170	24.5833	32.2567	11.4367	11.12	26.4467	29.4767	29.3133	32.3467	18.9833	17.2333	0.000661387	1	1	PF00004 ATPase family associated with various cellular activities (AAA)	IPR003959 ATPase, AAA-type, core / IPR003593 AAA+ ATPase domain / IPR027417 P-loop containing nucleoside triphosphate hydrolase
AT1G55310	19.14	15.8567	6.83	10.61	15.5867	22.9767	16.0867	21.1	18.9033	38.9767	0.000667567	0.328331	1	PF00076 RNA recognition motif. (a.k.a. RRM, RBD, or RNP domain)	IPR000504 RNA recognition motif domain / IPR012677 Nucleotide-binding, alpha-beta plait
AT3G08000	1.32667	1.62333	3.17667	4.35667	1.16667	2.28	4.17667	5.36	5.29333	6.72333	0.000668437	1	1	PF00076 RNA recognition motif. (a.k.a. RRM, RBD, or RNP domain)	IPR000504 RNA recognition motif domain / IPR012677 Nucleotide-binding, alpha-beta plait
AT1G66970	108.757	155.107	77.7067	81.7567	31.44	21.4133	187.123	96.0133	68.4467	80.23	0.00067755	1	1	PF03009 Glycerophosphoryl diester phosphodiesterase family / PF03009 Glycerophosphoryl diester phosphodiesterase family	IPR004129 Glycerophosphoryl diester phosphodiesterase / IPR017946 PLC-like phosphodiesterase, TIM beta/alpha-barrel domain
AT1G35516	20.81	25.8933	12.32	25.3967	26.1767	33.79	0.09	0.0866667	40.24	76.56	0.000680952	1	1
AT1G21450	12.09	16.98	6.81667	7.51333	6.11333	8.51667	5.58	5.93333	8.38333	8.07333	0.000685924	1	1	PF03514 GRAS domain family	IPR005202 Transcription factor GRAS
AT2G45290	3.97	4.41333	5.50667	5.22	9.78333	8.67	5.77333	4.79333	10.4833	11.76	0.00068789	1	1	PF00456 Transketolase, thiamine diphosphate binding domain / PF02779 Transketolase, pyrimidine binding domain / PF02780 Transketolase, C-terminal domain	IPR005476 Transketolase, C-terminal / IPR005474 Transketolase, N-terminal / IPR005475 Transketolase-like, pyrimidine-binding domain / IPR009014 Transketolase, C-terminal/Pyruvate-ferredoxin oxidoreductase, domain II / IPR005478 Transketolase, bacterial-like / IPR015941 Transketolase-like, C-terminal / IPR020826 Transketolase binding site
AT4G24920	59.1333	68.9767	57.1333	62.0067	65.4567	53.83	17.1533	15.94	15.3533	32.6633	0.000691501	1	1	PF00584 SecE/Sec61-gamma subunits of protein translocation complex	IPR001901 Protein translocase complex, SecE/Sec61-gamma subunit / IPR023391 Protein translocase SecE domain / IPR008158 Protein translocase SEC61 complex, gamma subunit
AT1G74560	54.6367	42.3433	46.6833	47.0533	52.6833	49.83	66.8167	43.5467	74.1733	132.03	0.000692447	1	0.413197	PF00956 Nucleosome assembly protein (NAP)	IPR002164 Nucleosome assembly protein (NAP)
AT5G14800	32.3367	25.4533	12.3033	17.47	24.1467	34.2867	87.4267	81.5433	38.49	48.92	0.000694454	1	1	PF03807 NADP oxidoreductase coenzyme F420-dependent / PF14748 Pyrroline-5-carboxylate reductase dimerisation	IPR004455 NADP oxidoreductase, coenzyme F420-dependent / IPR000304 Pyrroline-5-carboxylate reductase / IPR016040 NAD(P)-binding domain / IPR008927 6-phosphogluconate dehydrogenase, C-terminal-like
AT1G67470	8.65	12.6967	1.29	1.05333	2.14667	3.76333	2.22333	3.27	1.7	2.23333	0.000697237	1	1	PF00069 Protein kinase domain / PF00069 Protein kinase domain	IPR000719 Protein kinase, catalytic domain / IPR011009 Protein kinase-like domain / IPR002290 Serine/threonine- / dual specificity protein kinase, catalytic domain
AT5G61970	14.1467	14.3667	15.5067	16.2933	17.1333	17.55	13.3467	10.2133	18.3767	23.2567	0.000697493	1	1
AT4G24050	2.17	1.64333	3.19667	3.93	2.33667	1.91	1.53333	1.09	3.56	6.53667	0.000699015	1	1	PF00106 short chain dehydrogenase	IPR002198 Short-chain dehydrogenase/reductase SDR / IPR016040 NAD(P)-binding domain / IPR002347 Glucose/ribitol dehydrogenase
AT2G06025	24.4	26.0267	8.24	7.13333	11.0267	5.40667	17.0733	14.84	23.6	29.3133	0.000700357	1	1	PF00583 Acetyltransferase (GNAT) family	IPR000182 GNAT domain / IPR016181 Acyl-CoA N-acyltransferase
AT4G31410	8.26	15.0233	7	11.6967	8.44333	10.48	12.4867	16.1967	12.9167	26.02	0.000702332	0.000539313	1	PF07800 Protein of unknown function (DUF1644)	IPR012866 Protein of unknown function DUF1644
AT2G02770	1.09333	1.31333	0.98	1.21333	0.0833333	0.16	0.07	0.123333	0.123333	0.146667	0.000703092	1	1	PF01648 4'-phosphopantetheinyl transferase superfamily / PF01648 4'-phosphopantetheinyl transferase superfamily	IPR008278 4'-phosphopantetheinyl transferase superfamily
AT4G15955	4.19667	6.58	4.56333	9.93667	5.83	8.25	1.78333	2.48	2.68667	6.49333	0.000707185	0.000743285	1	PF12697 Alpha/beta hydrolase family / PF12697 Alpha/beta hydrolase family	IPR000639 Epoxide hydrolase-like / IPR000073 Alpha/beta hydrolase fold-1
AT5G56840	1.26333	5.46333	1.16	4.75667	0.53	4.09333	1.11	5.75	2.03667	25.9333	0.000710593	7.58888e-05	0.00376381	PF00249 Myb-like DNA-binding domain	IPR001005 SANT/Myb domain / IPR001878 Zinc finger, CCHC-type / IPR017930 Myb domain / IPR006447 Myb domain, plants / IPR009057 Homeodomain-like
AT2G45450	8.14	14.96	9.29333	16.7833	7.31667	12.0667	8.99333	9.48	11.2	28.9167	0.000715251	3.29144e-05	0.115116
AT1G70760	263.107	231.213	227.83	230.323	238.653	225.413	357.683	347.533	234.537	135.77	0.000727424	1	1	PF10716 NADH dehydrogenase transmembrane subunit	IPR019654 NAD(P)H-quinone oxidoreductase subunit L
AT2G24040	9.59333	11.7433	4.84667	5.44333	8.66333	18.1267	10.8933	17.9967	15.0667	22.52	0.000731078	0.0517792	1	PF01679 Uncharacterized protein family UPF0057	IPR000612 Proteolipid membrane potential modulator
AT4G26550	5.08	6.93	1.42667	2.34667	2.47667	2.24	2.58	2.63667	6.41667	10.61	0.000740672	1	1	PF04178 Got1-like family	IPR007305 Vesicle transport protein, Got1/SFT2-like / IPR011691 Vesicle transport protein, SFT2-like
AT4G09320	421.107	263.533	163.43	142.603	172.017	145.16	55.6467	57.94	403.65	738.42	0.000741284	1	1	PF00334 Nucleoside diphosphate kinase	IPR001564 Nucleoside diphosphate kinase / IPR023005 Nucleoside diphosphate kinase, active site
AT4G29160	67.4867	100.303	70.7267	119.407	82.34	105.313	31.6933	46.96	67.1867	152.353	0.000741535	0.000209126	1	PF03357 Snf7	IPR005024 Snf7
AT4G22960	0.106667	0.263333	0.983333	1.98333	0.2	0.603333	0.0533333	0.163333	1.10667	1.79667	0.000748832	1	1	PF04424 Protein of unknown function (DUF544)	IPR007518 Protein of unknown function DUF544
AT1G17620	29.9367	52.8733	35.5533	47.34	67.57	88.2667	37.11	62.2333	29.8733	40.67	0.000749841	0.0406995	1	PF03168 Late embryogenesis abundant protein	IPR004864 Late embryogenesis abundant protein, LEA-14
AT3G55420	10.3567	10.34	4.97333	2.52333	2.53333	3.12667	3.16667	3.92667	4.14667	4.17	0.000754064	1	1
AT1G30590	13.5133	14.9	10.9967	17	18.2367	21.3933	18.88	16.7467	20.8667	29.9333	0.000758064	1	1	PF05327 RNA polymerase I specific transcription initiation factor RRN3	IPR007991 RNA polymerase I specific transcription initiation factor RRN3
AT4G14190	5.82	6.77667	8.11	7.32667	2.37333	2.75	8.98	7.43333	7.56	8.04667	0.000776275	1	1	PF01535 PPR repeat 10-34 52-76 94-118 / PF01535 PPR repeat 10-34 52-76 94-118 / PF01535 PPR repeat 10-34 52-76 94-118 / PF01535 PPR repeat 10-34 52-76 94-118 / PF13041 PPR repeat family	IPR002885 Pentatricopeptide repeat
AT3G02860	11.5833	15.5167	12.59	17.8833	12.51	16.6533	7.17333	7.04667	13.6	18.1267	0.000780089	0.120218	1	PF12874 Zinc-finger of C2H2 type	IPR015880 Zinc finger, C2H2-like
AT1G29070	339.867	120.637	97.2533	44.4533	77.05	35.9067	88.6733	64.09	72.1167	22.5733	0.00078318	0.0921762	1	PF00468 Ribosomal protein L34	IPR000271 Ribosomal protein L34
AT1G29060	9.7	11.77	5.08333	8.52667	11.1667	15.9933	4.80667	8.29333	12.32	29.22	0.000787367	0.0649423	1		IPR000727 Target SNARE coiled-coil domain
AT5G44930	4.77333	7.21667	1.32	2.85	4.06333	3.17667	1.89667	4.33333	1.14667	2.00667	0.000788378	1	1	PF03016 Exostosin family	IPR004263 Exostosin-like
AT1G66260	51.5	51.9667	56.98	60.88	34.37	38.8233	33.1633	31.9167	51.7	71.4933	0.000789436	1	1	PF00076 RNA recognition motif. (a.k.a. RRM, RBD, or RNP domain)	IPR000504 RNA recognition motif domain / IPR012677 Nucleotide-binding, alpha-beta plait
AT5G66140	29.63	25.3567	21.16	23.7	27.3933	25.13	13.26	11.83	28.4033	37.99	0.000790922	1	1	PF00227 Proteasome A-type and B-type / PF10584 Proteasome subunit A N-terminal signature	IPR000426 Proteasome, alpha-subunit, N-terminal domain / IPR001353 Proteasome, subunit alpha/beta / IPR023332 Proteasome A-type subunit
AT2G28910	102.09	124.213	62.0367	74.1467	68.3067	73.1133	118.52	121.953	71.83	76.17	0.00079725	1	1	PF13917 Zinc knuckle	IPR001878 Zinc finger, CCHC-type
AT4G22280	0.626667	1.46	3.46	5.35333	4.41333	5.3	4.21333	5.31667	3.78	9.21667	0.00080021	0.101565	1	PF00646 F-box domain / PF07723 Leucine Rich Repeat	IPR001810 F-box domain, cyclin-like / IPR013101 Leucine-rich repeat 2 / IPR006566 FBD
AT5G40080	6.87667	7.15	1.50667	1.22	1.75667	1.64333	5.04	6.92667	3.41	4.46333	0.000806222	1	1	PF09809 Mitochondrial ribosomal protein L27	IPR019189 Ribosomal protein L27/L41, mitochondrial
AT2G07715	0.54	0.573333	0.636667	0.75	1.62	1.82333	1.54333	1.95333	0.803333	1.47	0.000810621	1	1	PF00181 Ribosomal Proteins L2, RNA binding domain	IPR022666 Ribosomal Proteins L2, RNA binding domain / IPR012340 Nucleic acid-binding, OB-fold / IPR002171 Ribosomal protein L2
AT5G01610	4.68	6.85333	2.36333	4.13	1.84667	1.47	8.93667	9.01	1.35667	6.75333	0.000815014	1	1	PF04398 Protein of unknown function, DUF538	IPR007493 Protein of unknown function DUF538
AT5G40820	0.25	0.383333	0.26	0.263333	0.253333	0.406667	0.756667	1.25333	0.41	0.323333	0.000815207	1	1	PF02259 FAT domain / PF02260 FATC domain / PF00454 Phosphatidylinositol 3- and 4-kinase / PF08064 UME (NUC010) domain / PF02259 FAT domain	IPR003151 PIK-related kinase, FAT / IPR003152 PIK-related kinase, FATC / IPR000403 Phosphatidylinositol 3-/4-kinase, catalytic domain / IPR012993 UME / IPR011009 Protein kinase-like domain / IPR016024 Armadillo-type fold / IPR018936 Phosphatidylinositol 3/4-kinase, conserved site / IPR014009 PIK-related kinase / IPR011990 Tetratricopeptide-like helical
AT4G21860	164.083	126.803	133.317	131.68	81.86	81.8767	117.857	111.727	167.867	129.4	0.000820881	1	1	PF01641 SelR domain	IPR002579 Peptide methionine sulphoxide reductase MrsB / IPR011057 Mss4-like
AT1G64510	318.38	167.533	323.847	162.47	149.93	71.8433	131.057	96.6733	338.473	122.67	0.000824066	9.72911e-06	1	PF01250 Ribosomal protein S6	IPR000529 Ribosomal protein S6 / IPR020814 Ribosomal protein S6, plastid/chloroplast / IPR014717 Translation elongation factor EF1B/ribosomal protein S6
AT4G04402	0	0	3.23	3.65333	1.38333	1.39	4.05667	4.43667	2.69667	1.38	0.000824122	1	1		IPR008207 Signal transduction histidine kinase, phosphotransfer (Hpt) domain
AT5G23520	6.49667	10.0767	2.10333	2.08667	13.4167	14.4267	14.8367	13.85	12.47	22.33	0.000828491	1	1	PF08590 Domain of unknown function (DUF1771) / PF01713 Smr domain	IPR013899 Domain of unknown function DUF1771 / IPR002625 Smr protein/MutS2 C-terminal
AT5G03970	5.13333	6.24	2.55	4.92667	4.31	6.11333	4.21667	4.52667	6.34333	9.23	0.000832157	0.0382125	1		IPR017451 F-box associated interaction domain
AT2G05630	12.4567	32.2967	11.5033	29.64	10.6033	17.8	10.79	23.9833	35.86	80.91	0.000834476	0.019786	1	PF02991 Microtubule associated protein 1A/1B, light chain 3	IPR004241 Autophagy protein Atg8 ubiquitin-like / IPR027732 Autophagy-related protein 8, Streptophyta
AT2G32180	18.1167	9.79667	31.4967	20.6467	33.8567	18.76	80.5033	61.6467	42.9533	42.1233	0.000837621	1	1	PF05899 Protein of unknown function (DUF861)	IPR008579 Domain of unknown function DUF861, cupin-3 / IPR014710 RmlC-like jelly roll fold / IPR011051 RmlC-like cupin domain
AT3G50520	15.47	17.58	7.74667	8.07	13.0467	14.3833	16.21	17.9333	9.08667	9.58667	0.000840331	1	1	PF00300 Phosphoglycerate mutase family	IPR013078 Histidine phosphatase superfamily, clade-1 / IPR001345 Phosphoglycerate/bisphosphoglycerate mutase, active site
AT1G59950	0.1	0.0433333	0.0433333	0.0333333	0	0.113333	1.63	0.453333	0	0.493333	0.000841011	1	0.121354	PF00248 Aldo/keto reductase family / PF00248 Aldo/keto reductase family	IPR023210 NADP-dependent oxidoreductase domain / IPR018170 Aldo/keto reductase, conserved site / IPR020471 Aldo/keto reductase subgroup / IPR001395 Aldo/keto reductase
AT2G21370	21.8333	25.9133	10.4767	10.1133	8.97667	8.46667	8.58333	11	10.6067	10.9133	0.000846061	1	1	PF00370 FGGY family of carbohydrate kinases, N-terminal domain / PF02782 FGGY family of carbohydrate kinases, C-terminal domain	IPR018484 Carbohydrate kinase, FGGY, N-terminal / IPR018485 Carbohydrate kinase, FGGY, C-terminal
AT2G25590	1.87333	5.43	1.68	6.36333	3.22667	3.66333	0.686667	1.08667	2.66667	11.4067	0.000860883	8.44176e-05	0.0382028	PF05641 Agenet domain	IPR008395 Agenet-like domain / IPR014002 Tudor-like, plant
AT3G03070	95.58	92.3267	62.6433	66.8933	69.09	61.5167	87.49	96.8433	92.02	128.38	0.000861766	1	1	PF10276 Zinc-finger domain	IPR019401 Zinc finger, CHCC-type / IPR016668 NADH dehydrogenase [ubiquinone] (complex I), iron-sulphur protein 6, mitochondria
AT4G15640	5.84333	4.81667	5.25333	3.24	7.12667	4.2	3.46667	1.31667	7.57	9.67333	0.000875241	1	1
AT5G52870	10.2967	13.86	4.37333	6.49333	2.54	2.25333	6.92333	6.41667	3.60333	4.53333	0.000886733	1	1
AT4G38495	12.0367	9.84333	3.63333	8.03333	11.85	17.7067	14.51	23.03	5.17	11.31	0.000889135	0.676031	1	PF08265 YL1 nuclear protein C-terminal domain	IPR013272 YL1 nuclear, C-terminal
AT1G26160	18.02	15.9533	17.04	20.42	20.1733	19.8467	19.3367	18.9833	27.32	28.6167	0.000889973	1	1	PF13023 HD domain	IPR003607 HD/PDEase domain / IPR006674 HD domain
AT2G45920	2.10667	4.00667	8.22	14.7967	1.96333	2.85	1.21333	1.63667	5.18667	7.11	0.000894402	1	1	PF04564 U-box domain	IPR003613 U box domain / IPR014729 Rossmann-like alpha/beta/alpha sandwich fold / IPR013083 Zinc finger, RING/FYVE/PHD-type
AT3G23340	7.50667	13.24	11.36	19.0967	5.85667	11.03	5.88333	10.3967	8.44	28.3133	0.000901624	5.75748e-06	0.188914	PF00069 Protein kinase domain / PF00069 Protein kinase domain	IPR000719 Protein kinase, catalytic domain / IPR011009 Protein kinase-like domain / IPR002290 Serine/threonine- / dual specificity protein kinase, catalytic domain / IPR017441 Protein kinase, ATP binding site / IPR008271 Serine/threonine-protein kinase, active site
AT5G07690	17.0167	12.7367	54.49	13.97	7.22667	7.44333	11	5.98667	17.5467	2.97	0.000909149	0.0188614	0.112194	PF00249 Myb-like DNA-binding domain / PF00249 Myb-like DNA-binding domain	IPR001005 SANT/Myb domain / IPR017930 Myb domain / IPR009057 Homeodomain-like
AT1G43160	0.1	0.28	0.133333	0.0633333	4.56	0	0.353333	0	0.816667	0	0.000911564	0.00971053	0.000382651	PF00847 AP2 domain	IPR001471 AP2/ERF domain / IPR016177 DNA-binding, integrase-type
AT4G32460	31.3667	7.89667	42.4667	12.63	43.1333	12.62	22.9133	7.88	10.5133	7.95667	0.000911652	3.56065e-08	0.128425	PF04862 Protein of unknown function (DUF642) / PF04862 Protein of unknown function (DUF642) / PF04862 Protein of unknown function (DUF642)	IPR006946 Protein of unknown function DUF642 / IPR008979 Galactose-binding domain-like
AT3G09820	118.11	103.987	97.5967	71.3633	152.153	145.427	125.817	119.327	138.913	141.633	0.00091615	1	1	PF00294 pfkB family carbohydrate kinase	IPR011611 Carbohydrate kinase PfkB / IPR001805 Adenosine kinase / IPR002173 Carbohydrate/puine kinase, PfkB, conserved site
AT2G22890	1.63667	2.62667	3.19667	4.66	6.86333	7.74	3.00667	3.94333	2.33333	0.593333	0.000917419	1	1	PF10520 Kua-ubiquitin conjugating enzyme hybrid localisation domain	IPR019547 Kua-ubiquitin conjugating enzyme hybrid, localisation
AT4G15093	4.16	8.00667	3.82667	9.39667	5.45	9.31667	6.06667	8.33	4.44	21.7267	0.000919527	2.03103e-07	0.000282471	PF02900 Catalytic LigB subunit of aromatic ring-opening dioxygenase	IPR004183 Extradiol ring-cleavage dioxygenase, class III enzyme, subunit B / IPR014436 Extradiol aromatic ring-opening dioxygenase, DODA type
AT1G19485	6.04	7.00667	2.90667	3.70667	2.53333	2.77	3.84	3.27667	3.44	3.92667	0.000920547	1	1	PF02178 AT hook motif / PF02178 AT hook motif / PF00400 WD domain, G-beta repeat 893-931 938-975 1109-1147 1194-1232 1236-1273 1277-1315 1319-1357 1361-1399	IPR017956 AT hook, DNA-binding motif / IPR001680 WD40 repeat / IPR020478 AT hook-like / IPR017986 WD40-repeat-containing domain / IPR015943 WD40/YVTN repeat-like-containing domain / IPR000637 HMG-I/HMG-Y, DNA-binding, conserved site
AT5G39850	9.53667	8.88667	7.15333	16.0467	9.62333	16.05	10.68	12.0367	19.4933	61.9467	0.000920959	0.673515	0.502001	PF01479 S4 domain / PF00163 Ribosomal protein S4/S9 N-terminal domain	IPR002942 RNA-binding S4 domain / IPR001912 Ribosomal protein S4/S9, N-terminal / IPR022801 Ribosomal protein S4/S9 / IPR018079 Ribosomal protein S4, conserved site / IPR005710 Ribosomal protein S4/S9, eukaryotic/archaeal
AT1G65540	19.4567	33.4867	15.8667	17.8333	24.6667	26.56	27.1733	21.2333	5.96	9.40667	0.000930151	1	1	PF07766 LETM1-like protein	IPR011685 LETM1-like / IPR002048 EF-hand domain / IPR011992 EF-hand-like domain
AT2G20060	14.3967	15.0233	9.54	8.03	10.6333	8.64667	12.2267	8.44667	14.1633	22.9867	0.000937387	1	1	PF00573 Ribosomal protein L4/L1 family	IPR002136 Ribosomal protein L4/L1e / IPR023574 Ribosomal protein L4 domain / IPR013005 Ribosomal protein L4/L1e, bacterial-type
AT4G00290	7.73667	9.51	5.03333	4.81333	4.93333	3.8	4.27667	3.45	5.24333	6.90333	0.000945585	1	1	PF00924 Mechanosensitive ion channel	IPR006685 Mechanosensitive ion channel MscS / IPR010920 Like-Sm (LSM) domain / IPR011014 Mechanosensitive ion channel MscS, transmembrane-2
AT5G67500	58.4267	55.5967	44.77	41.07	80.1433	70.05	70.8767	67.27	62.9367	69.3733	0.00095103	1	1	PF01459 Eukaryotic porin	IPR001925 Porin, eukaryotic type / IPR027246 Eukaryotic porin/Tom40 / IPR023614 Porin domain
AT3G06470	21.2333	20.7133	6.63	8.77	13.2167	12.8033	9.03667	7.43	6.78333	6.09667	0.000972344	1	1	PF01151 GNS1/SUR4 family	IPR002076 GNS1/SUR4 membrane protein
AT4G37150	0.963333	1.31333	1.22	0.793333	13	8.45	0.856667	0.353333	15.12	11.08	0.000984424	1	1	PF12697 Alpha/beta hydrolase family
AT1G35470	9.06	11.36	5.95667	8.3	8.07	9.66667	8.7	10.2333	9.53333	21.53	0.000985041	0.00656012	0.20238	PF10607 Ran binding protein in the microtubule-organising centre / PF00622 SPRY domain	IPR024964 CTLH/CRA C-terminal to LisH motif domain / IPR003877 SPla/RYanodine receptor SPRY / IPR001870 B30.2/SPRY domain / IPR006594 LisH dimerisation motif / IPR006595 CTLH, C-terminal LisH motif / IPR008985 Concanavalin A-like lectin/glucanases superfamily / IPR018355 SPla/RYanodine receptor subgroup / IPR013144 CRA domain
AT5G02590	7.86	7.62333	8.89333	6.22667	10.34	6.57	2.56667	1.36667	7.66667	14.5033	0.000988829	1	1	PF13174 Tetratricopeptide repeat / PF14559 Tetratricopeptide repeat	IPR011990 Tetratricopeptide-like helical / IPR019734 Tetratricopeptide repeat / IPR013026 Tetratricopeptide repeat-containing domain
AT2G14910	107.977	91.8967	66.1267	52.3633	73.3567	66.2733	96.0367	61.5633	99.5267	124.847	0.00100086	1	1	PF05542 Protein of unknown function (DUF760) / PF05542 Protein of unknown function (DUF760)	IPR008479 Protein of unknown function DUF760
AT3G45638	0.923333	1.89	1.81667	2.33	0	0	0	0	0.98	1.22	0.00100205	1	1
AT1G22430	24.7333	21.05	40.9833	38.8133	29.9733	27.1	36.5333	41.96	52.2033	51.98	0.00100913	1	1	PF08240 Alcohol dehydrogenase GroES-like domain / PF00107 Zinc-binding dehydrogenase	IPR013154 Alcohol dehydrogenase GroES-like / IPR013149 Alcohol dehydrogenase, C-terminal / IPR011032 GroES-like / IPR016040 NAD(P)-binding domain / IPR002328 Alcohol dehydrogenase, zinc-type, conserved site / IPR002085 Alcohol dehydrogenase superfamily, zinc-type
AT2G28940	7.55	18.3667	10.4433	23.5133	17.3533	16.6933	3.42667	5.27	8.64333	43.4467	0.00100987	0.000289819	0.00650484	PF00069 Protein kinase domain	IPR000719 Protein kinase, catalytic domain / IPR011009 Protein kinase-like domain
AT5G45040	12.3733	6.63667	41.9833	41.0767	10.46	4.00333	12.3133	10.8533	11.7467	0.85	0.00101935	1	1	PF13442 Cytochrome C oxidase, cbb3-type, subunit III	IPR009056 Cytochrome c domain
AT4G15500	1.55667	2.31333	2.60667	2.17	3.29667	2.13667	1.62667	1.65	3.23667	7.66667	0.00103599	1	0.191204	PF00201 UDP-glucoronosyl and UDP-glucosyl transferase	IPR002213 UDP-glucuronosyl/UDP-glucosyltransferase
AT3G59760	16.4933	23.4033	19.24	18.5233	9.71667	12.19	16.85	17.47	20.97	25.7267	0.00104502	1	1	PF00291 Pyridoxal-phosphate dependent enzyme	IPR001926 Tryptophan synthase beta subunit-like PLP-dependent enzymes superfamily / IPR001216 Cysteine synthase/cystathionine beta-synthase P-phosphate-binding site / IPR005856 Cysteine synthase K/M / IPR005859 Cysteine synthase A
AT1G62930	2.55667	2.45333	2.23667	1.76333	2.74333	1.97333	0.38	0.186667	2.34667	2.50333	0.00105472	1	1	PF13041 PPR repeat family / PF13041 PPR repeat family / PF13041 PPR repeat family / PF13041 PPR repeat family / PF13041 PPR repeat family / PF13041 PPR repeat family / PF12854 PPR repeat / PF13812 Pentatricopeptide repeat domain	IPR002885 Pentatricopeptide repeat / IPR011990 Tetratricopeptide-like helical
AT4G23260	18.6033	30.02	3.39333	9.30333	6.27667	7.61	25.24	17.55	21.3033	21.9367	0.00105718	1	1	PF01657 Salt stress response/antifungal / PF01657 Salt stress response/antifungal / PF07714 Protein tyrosine kinase	IPR002902 Gnk2-homologous domain / IPR001245 Serine-threonine/tyrosine-protein kinase catalytic domain / IPR011009 Protein kinase-like domain / IPR017441 Protein kinase, ATP binding site / IPR008271 Serine/threonine-protein kinase, active site / IPR013320 Concanavalin A-like lectin/glucanase, subgroup / IPR000719 Protein kinase, catalytic domain / IPR002290 Serine/threonine- / dual specificity pr…
AT4G04760	0.336667	0.216667	0.343333	1.24333	0.426667	0.75	0.0566667	0.41	0.513333	4.21667	0.00105818	0.0165321	0.00920231	PF00083 Sugar (and other) transporter	IPR005828 General substrate transporter / IPR016196 Major facilitator superfamily domain, general substrate transporter / IPR003663 Sugar/inositol transporter / IPR020846 Major facilitator superfamily domain / IPR005829 Sugar transporter, conserved site
AT1G63855	3.02333	4.85	4.77333	5.4	1.85333	2.34	1.03333	0.58	4.89	7.66333	0.001071	1	1	PF10294 Putative methyltransferase	IPR019410 Nicotinamide N-methyltransferase-like
AT1G66960	0.496667	3.86333	0.53	3.21	8.96	5.82	2.05667	0.0833333	0.0266667	0.0666667	0.00107191	1	1	PF00432 Prenyltransferase and squalene oxidase repeat / PF00432 Prenyltransferase and squalene oxidase repeat	IPR001330 Prenyltransferase/squalene oxidase / IPR002365 Terpene synthase, conserved site / IPR018333 Squalene cyclase / IPR008930 Terpenoid cyclases/protein prenyltransferase alpha-alpha toroid
AT4G16890	38.38	68.09	1.49333	1.06	0.156667	0.33	15.1233	13.0033	12.2867	10.96	0.00108008	1	1	PF07725 Leucine Rich Repeat / PF07725 Leucine Rich Repeat / PF00931 NB-ARC domain / PF01582 TIR domain / PF00560 Leucine Rich Repeat 17-38 40-61 / PF00560 Leucine Rich Repeat 17-38 40-61 / PF00560 Leucine Rich Repeat 17-38 40-61 / PF00560 Leucine Rich Repeat 17-38 40-61 / PF13504 Leucine rich repeat	IPR011713 Leucine-rich repeat 3 / IPR002182 NB-ARC / IPR000157 Toll/interleukin-1 receptor homology (TIR) domain / IPR001611 Leucine-rich repeat / IPR027417 P-loop containing nucleoside triphosphate hydrolase / IPR000767 Disease resistance protein
AT4G15570	3.20667	3.09	2.38667	2.81333	1.99333	1.52667	1.99667	1.00333	2.50667	3.51333	0.00108049	1	1	PF13087 AAA domain / PF13086 AAA domain	IPR027417 P-loop containing nucleoside triphosphate hydrolase / IPR026852 Probable helicase MAGATAMA 3 / IPR014001 Helicase, superfamily 1/2, ATP-binding domain
AT1G74410	4.13667	9.02333	4.19333	12.5633	6.19667	9.55	5.27	9.91667	5.65	21.4467	0.00108476	1.26496e-08	0.00420221	PF13639 Ring finger domain / PF13639 Ring finger domain	IPR001841 Zinc finger, RING-type / IPR013083 Zinc finger, RING/FYVE/PHD-type
AT1G14210	14.8967	10.7067	12.17	9.85667	13.9967	8.34	13.9967	11.22	2.25333	3.15667	0.00108551	1	1	PF00445 Ribonuclease T2 family	IPR001568 Ribonuclease T2-like / IPR018188 Ribonuclease T2, active site
AT2G47710	136.83	166.33	66.27	129.813	58.79	116.42	131.793	219.7	66.12	148.377	0.00109275	5.33205e-05	1	PF00582 Universal stress protein family 1-163	IPR006016 UspA / IPR006015 Universal stress protein A / IPR014729 Rossmann-like alpha/beta/alpha sandwich fold
AT5G60430	2.66667	4.73667	7.95	14.1433	4.35	4.95	4.63	6.75	11.2733	26.85	0.00110503	1	1
AT5G50650	4.34	4.72	0.61	1.59	1.08	1.41333	1.06	1.29333	0.963333	2.92	0.00111365	1	1	PF00400 WD domain, G-beta repeat 893-931 938-975 1109-1147 1194-1232 1236-1273 1277-1315 1319-1357 1361-1399 / PF00400 WD domain, G-beta repeat 893-931 938-975 1109-1147 1194-1232 1236-1273 1277-1315 1319-1357 1361-1399 / PF00400 WD domain, G-beta repeat 893-931 938-975 1109-1147 1194-1232 1236-1273 1277-1315 1319-1357 1361-1399	IPR001680 WD40 repeat / IPR017986 WD40-repeat-containing domain / IPR015943 WD40/YVTN repeat-like-containing domain
AT3G28540	20.1933	51.3767	8.72	20.4833	9	14.76	9.03667	3.77333	25.6	47.9333	0.00112543	0.427064	1	PF14363 Domain associated at C-terminal with AAA / PF00004 ATPase family associated with various cellular activities (AAA)	IPR025753 AAA-type ATPase, N-terminal domain / IPR003959 ATPase, AAA-type, core / IPR003593 AAA+ ATPase domain / IPR027417 P-loop containing nucleoside triphosphate hydrolase
AT2G42640	0.703333	1.58667	0.563333	0.92	1.86333	2.72333	0.976667	0.886667	1.14	3.53333	0.00112694	0.0248489	1	PF14381 Ethylene-responsive protein kinase Le-CTR1 / PF07714 Protein tyrosine kinase	IPR001245 Serine-threonine/tyrosine-protein kinase catalytic domain / IPR008266 Tyrosine-protein kinase, active site / IPR011009 Protein kinase-like domain / IPR000719 Protein kinase, catalytic domain / IPR017441 Protein kinase, ATP binding site / IPR026840 Armadillo repeat-containing protein 3 and Serine/threonine-protein kinase CTR1
AT5G03350	96.8633	211.353	43.92	106.283	76.77	76.9733	0.596667	0.64	6.41333	4.03667	0.00112727	1	1	PF00139 Legume lectin domain	IPR001220 Legume lectin domain / IPR013320 Concanavalin A-like lectin/glucanase, subgroup / IPR016363 Lectin / IPR008985 Concanavalin A-like lectin/glucanases superfamily
AT3G50110	2.21333	2.17333	1.19667	0.773333	2.28667	2.27667	2.61	2.16333	1.41	0.54	0.00112963	1	1	PF00782 Dual specificity phosphatase, catalytic domain	IPR000340 Dual specificity phosphatase, catalytic domain / IPR014019 Phosphatase tensin type / IPR014020 Tensin phosphatase, C2 domain / IPR016130 Protein-tyrosine phosphatase, active site
AT4G02540	4.81333	7.7	0.0633333	0.0233333	0.0533333	0.09	0.0366667	0.0366667	0.0366667	0.0866667	0.00113273	1	1	PF03107 C1 domain / PF03107 C1 domain / PF03107 C1 domain / PF07649 C1-like domain / PF07649 C1-like domain	IPR004146 DC1 / IPR011424 C1-like / IPR013083 Zinc finger, RING/FYVE/PHD-type / IPR019787 Zinc finger, PHD-finger
AT4G10140	11.0333	11.3367	5.72667	8.49333	9.47333	8.22	12.72	19.22	5.02	11.9867	0.00113276	0.834273	1	PF09835 Uncharacterized protein conserved in bacteria (DUF2062)	IPR018639 Domain of unknown function DUF2062
AT1G24800	3.37	4.72667	0.156667	0.0366667	2.75333	3.23	0	0	2.18333	4.44667	0.0011393	1	1	PF07734 F-box associated / PF00646 F-box domain	IPR006527 F-box associated domain, type 1 / IPR017451 F-box associated interaction domain / IPR001810 F-box domain, cyclin-like
AT4G01940	65.1467	98.04	37.4367	77.2433	22.5933	32.4367	59.9733	101.857	39.9333	88.59	0.00114922	0.000216291	1	PF01106 NifU-like domain	IPR001075 NIF system FeS cluster assembly, NifU, C-terminal
AT4G00585	71.0467	65.4167	28.2867	28.4033	27.3833	25.6167	27.3833	29.5733	27.6167	43.6567	0.00115827	1	1
AT2G18440	68.66	172.037	22.32	72.8767	38.64	56.18	32.8033	64.3567	28.7533	112.477	0.00115861	1.67393e-05	1
AT4G15660	8.55667	0.0633333	0.39	0	11.8867	0.273333	1.15	0.0633333	0.0666667	0	0.00115917	0.000225664	0.00208562	PF00462 Glutaredoxin	IPR002109 Glutaredoxin / IPR012336 Thioredoxin-like fold / IPR011905 Glutaredoxin-like, plant II / IPR014025 Glutaredoxin subgroup
AT1G64690	1.66	1.67	0.38	0.86	1.3	1.37	0.946667	2.78333	0.66	0.2	0.00116418	1	0.352548
AT5G37400	0.833333	0.573333	1.18	0.88	1.17333	0.903333	0.0166667	0.0166667	0.203333	0.19	0.00117472	1	1	PF04510 Family of unknown function (DUF577) / PF04510 Family of unknown function (DUF577)	IPR007598 Protein of unknown function DUF577
AT3G48710	8.94333	14.5267	9.28667	13.5367	4.88667	7.34667	12.8667	15.5533	14.2433	19.2767	0.00117823	0.145418	1	PF08766 DEK C terminal domain	IPR014876 DEK, C-terminal / IPR009057 Homeodomain-like
AT1G27580	0.433333	0.753333	10.3867	6.16667	10.3333	7.42333	0.223333	0.31	0.59	0.75	0.00119741	1	1	PF03478 Protein of unknown function (DUF295)	IPR005174 Protein of unknown function DUF295
AT2G43375	1.25667	1.05333	1.62667	3.65	1.49	2.75333	0.686667	1.56	4.25667	10.7367	0.0011988	1	1
AT1G52780	7.08	14.9967	1.79667	2.05	7.34667	6.24333	2.14667	1.43333	6.38667	8.78	0.00120706	1	1	PF11145 Protein of unknown function (DUF2921)	IPR021319 Protein of unknown function DUF2921
AT1G64240	0.0133333	0	0	0.0133333	0.606667	0.986667	0.01	0	0	0.02	0.00121162	1	1
AT4G27380	22.9567	18.9633	6.35	5.03	6.1	6.11	21.6967	20.7767	24.0433	42.5767	0.0012405	1	1
AT5G62300	199.29	114.787	166.847	154.67	151.597	120.667	88.1833	70.7967	60.8067	92.46	0.00124244	1	1	PF00338 Ribosomal protein S10p/S20e	IPR001848 Ribosomal protein S10 / IPR005729 Ribosomal protein S10, eukaryotic/archaeal / IPR027486 Ribosomal protein S10 domain / IPR018268 Ribosomal protein S10, conserved site
AT5G44080	10.7367	15.9233	7.84	15.71	11.1067	16.52	7.07	7.36667	6.75667	10.3233	0.00125183	0.000355134	1	PF00170 bZIP transcription factor	IPR011616 bZIP transcription factor, bZIP-1 / IPR004827 Basic-leucine zipper domain
AT4G36640	9.56333	14.25	11.8767	17.2133	6.45333	13.1167	13.1733	14.1433	19.02	50.78	0.00125194	0.265669	1	PF00650 CRAL/TRIO domain / PF03765 CRAL/TRIO, N-terminus	IPR001251 CRAL-TRIO domain / IPR011074 CRAL/TRIO, N-terminal domain / IPR001071 Cellular retinaldehyde binding/alpha-tocopherol transport
AT5G45130	35.4533	53.0133	14.7233	29.4833	41.39	60.0133	16.7	24.45	43.1533	111.897	0.00125719	0.0574254	1	PF00071 Ras family	IPR001806 Small GTPase superfamily / IPR005225 Small GTP-binding protein domain / IPR003579 Small GTPase superfamily, Rab type / IPR020849 Small GTPase superfamily, Ras type / IPR003578 Small GTPase superfamily, Rho type / IPR002041 Ran GTPase / IPR027417 P-loop containing nucleoside triphosphate hydrolase
AT1G32090	3.81333	3.88333	4.73667	4.66	10.9467	11.4467	3.34	5.4	2.47	1.1	0.00125731	1	1	PF13967 Late exocytosis, associated with Golgi transport / PF02714 Domain of unknown function DUF221 / PF14703 Domain of unknown function (DUF4463)	IPR003864 Domain of unknown function DUF221 / IPR027815 Domain of unknown function DUF4463
AT2G46080	18.05	22.29	17.12	23.5933	17.6867	23.8333	20.48	23.94	22.7967	63.3333	0.00126615	0.0111043	0.0458302	PF05633 Protein of unknown function (DUF793)	IPR008511 Protein BYPASS-related
AT3G11890	7.17667	7.95667	9.03667	10.8	9.59	11.43	3.37667	2.89	11.0633	9.69	0.00127098	1	1	PF07647 SAM domain (Sterile alpha motif)	IPR011510 Sterile alpha motif, type 2 / IPR013761 Sterile alpha motif/pointed domain / IPR001660 Sterile alpha motif domain
AT2G39110	0.416667	0.486667	2.14333	5.85333	3.62	4.92333	3.44667	4.45	2.04	7.25333	0.0012711	0.00335118	1	PF00069 Protein kinase domain	IPR000719 Protein kinase, catalytic domain / IPR011009 Protein kinase-like domain / IPR017441 Protein kinase, ATP binding site / IPR002290 Serine/threonine- / dual specificity protein kinase, catalytic domain / IPR020635 Tyrosine-protein kinase, catalytic domain
AT4G19100	28.9433	15.8033	13.9033	6.99333	28.0133	24.6867	26.3533	24.78	15.65	10.67	0.00127622	1	1	PF11947 Protein of unknown function (DUF3464)	IPR021855 Protein of unknown function DUF3464
AT5G28540	68.4833	110.543	61.85	96.46	42.02	44.97	59.3333	37.6933	66.5767	168.277	0.00128821	0.0992659	0.0909322	PF00012 Hsp70 protein	IPR013126 Heat shock protein 70 family / IPR018181 Heat shock protein 70, conserved site
AT1G50260	3.71667	5.62	4.95	7.34667	4.73	6.84333	5.40667	5.65667	8.46	10.56	0.00129466	0.390784	1	PF00168 C2 domain / PF10296 Putative integral membrane protein conserved region (DUF2404)	IPR000008 C2 calcium-dependent membrane targeting / IPR019411 Domain of unknown function DUF2404 / IPR008973 C2 calcium/lipid-binding domain, CaLB / IPR018029 C2 membrane targeting protein
AT5G04710	16.2167	18.5533	10.5433	11.1133	20.51	19.86	20.62	20.1167	13.2933	13.0767	0.00131416	1	1	PF02127 Aminopeptidase I zinc metalloprotease (M18)	IPR001948 Peptidase M18 / IPR023358 Peptidase M18, domain 2
AT5G43820	0.69	1.33	0.813333	1.18333	0.81	0.75	0.11	0.143333	1.4	2.77333	0.00131469	1	1	PF01535 PPR repeat 10-34 52-76 94-118 / PF01535 PPR repeat 10-34 52-76 94-118 / PF01535 PPR repeat 10-34 52-76 94-118 / PF13041 PPR repeat family / PF13041 PPR repeat family / PF13041 PPR repeat family	IPR002885 Pentatricopeptide repeat / IPR011990 Tetratricopeptide-like helical
AT1G08760	3.62333	6.92667	4.72333	7.67667	2.58667	3.68	5.58	6.67333	2.96	4.34333	0.001326	0.00168029	1	PF06075 Plant protein of unknown function (DUF936)	IPR010341 Protein of unknown function DUF936, plant
AT5G38360	5.81333	6.76	1.97667	2.20333	1.45667	1.53333	2.61667	2.18	3.11	3.60667	0.00133025	1	1	PF12697 Alpha/beta hydrolase family / PF12697 Alpha/beta hydrolase family
AT5G08420	35.98	32.2433	33.2467	33.0767	40.06	34.84	41.6667	34.9333	48.8533	53.3033	0.00134119	1	1		IPR024166 Ribosomal RNA assembly KRR1
AT3G19520	15.94	23.35	2.71667	5.92	15.2	19.81	18.5433	30.3567	16.95	36.91	0.00136834	0.0800417	1	PF04776 Protein of unknown function (DUF626)	IPR006462 Protein of unknown function DUF626, Arabidopsis thaliana
AT4G37710	0.106667	0	0	0.0966667	1.14333	0.06	0	0	0.103333	0	0.00137902	0.388309	0.00336076	PF05678 VQ motif	IPR008889 VQ
AT3G10670	53.0033	49.87	43.4833	35.87	38.0033	32.43	65.2733	53.1	47.0833	30.8867	0.00139472	0.820244	1	PF00005 ABC transporter	IPR003439 ABC transporter-like / IPR010230 FeS cluster assembly SUF system, ATPase SufC / IPR027417 P-loop containing nucleoside triphosphate hydrolase / IPR003593 AAA+ ATPase domain / IPR017871 ABC transporter, conserved site
AT3G62420	14.3733	24.0967	5.00333	8.43333	6.38	11.63	6.80333	12.4167	9.40667	11.53	0.00140314	0.063328	1	PF00170 bZIP transcription factor	IPR011616 bZIP transcription factor, bZIP-1 / IPR004827 Basic-leucine zipper domain
AT2G47750	3.82667	1.47667	1.97333	1.10667	1.15667	1.58	3.99667	3.06333	8.38333	1.27	0.00140407	0.000494704	0.00103635	PF03321 GH3 auxin-responsive promoter	IPR004993 GH3 auxin-responsive promoter
AT4G13575	39.1067	28.2933	6.33333	2.01333	3.58333	2.06333	9.23	5.76333	26.0467	9.84333	0.00140701	1	1
AT3G09940	4.17	6.34333	0.296667	0.6	14.7433	14.24	5.81	0.893333	4.72	7.76333	0.0014082	1	1	PF00070 Pyridine nucleotide-disulphide oxidoreductase 144-177 / PF07992 Pyridine nucleotide-disulphide oxidoreductase / PF07992 Pyridine nucleotide-disulphide oxidoreductase	IPR001327 Pyridine nucleotide-disulphide oxidoreductase, NAD-binding domain / IPR023753 Pyridine nucleotide-disulphide oxidoreductase, FAD/NAD(P)-binding domain / IPR013027 FAD-dependent pyridine nucleotide-disulphide oxidoreductase / IPR016156 FAD/NAD-linked reductase, dimerisation
AT3G21950	5.49333	3.49	13.2533	6.61	9.60667	5.67	11.7333	9.37	5.35	3.35	0.00140924	0.0260741	1	PF03492 SAM dependent carboxyl methyltransferase	IPR005299 SAM dependent carboxyl methyltransferase
AT3G24517	0	0	2.07667	1.86333	3.76333	2.36333	0	0	5.04667	2.6	0.00141702	1	1
AT2G17320	13.3733	16.1733	18.7367	24.74	26.5933	27.6833	15.2567	16.7333	16.37	26.7733	0.00142312	1	1	PF01937 Protein of unknown function DUF89 / PF01937 Protein of unknown function DUF89	IPR002791 Domain of unknown function DUF89 / IPR016949 Uncharacterised conserved protein UCP030210
AT1G64960	2	2.50667	0.31	0.133333	1.02333	1.21667	2.86333	2.01333	1.62	1.35667	0.00143552	1	1	PF12422 Condensin II non structural maintenance of chromosomes subunit	IPR024741 Condensin-2 complex subunit G2 / IPR016024 Armadillo-type fold / IPR011989 Armadillo-like helical
AT3G23570	27.9433	48.4933	22.0967	25.95	7.32	25.6433	52.94	51.7833	28.17	29.16	0.00143896	1	1	PF01738 Dienelactone hydrolase family	IPR002925 Dienelactone hydrolase
AT3G53780	9.03667	15.4133	9.35	15.61	10.3333	11.8133	10.7167	10.57	15.63	26.51	0.00144753	0.0281794	1	PF01694 Rhomboid family	IPR022764 Peptidase S54, rhomboid domain / IPR002610 Peptidase S54, rhomboid
AT3G11010	14.3367	53.2567	5.62667	9.63	0.28	0.19	0.103333	0.21	0.146667	0.343333	0.00144775	1	1	PF00560 Leucine Rich Repeat 17-38 40-61 / PF00560 Leucine Rich Repeat 17-38 40-61 / PF08263 Leucine rich repeat N-terminal domain / PF12799 Leucine Rich repeats (2 copies) / PF13504 Leucine rich repeat / PF13504 Leucine rich repeat / PF13516 Leucine Rich repeat / PF13855 Leucine rich repeat / PF13855 Leucine rich repeat / PF13855 Leucine rich repeat / PF13855 Leucine rich repeat / PF13855 Leucine…	IPR013210 Leucine-rich repeat-containing N-terminal, type 2 / IPR001611 Leucine-rich repeat / IPR025875 Leucine rich repeat 4
AT5G45480	8.67	12.45	11.4767	9.41333	7.94333	12.4733	2.60333	1.67667	14.7167	8.91333	0.00144825	1	1	PF04578 Protein of unknown function, DUF594 / PF13968 Domain of unknown function (DUF4220)	IPR007658 Protein of unknown function DUF594 / IPR025315 Domain of unknown function DUF4220
AT4G33700	5.15667	11.9267	8.74333	20.5867	11.8333	19.88	4.65333	10.26	10.8	24.0433	0.00144974	3.41353e-06	1	PF01595 Domain of unknown function DUF21 / PF00571 CBS domain pair	IPR002550 Domain of unknown function DUF21 / IPR000644 Cystathionine beta-synthase, core
AT3G23710	5.67333	4.67	7.55	5.97	6.98667	5.71667	9.21667	8.10333	10.5367	12.4433	0.00145037	1	1	PF04278 Tic22-like family / PF04278 Tic22-like family	IPR007378 Tic22-like
AT1G51965	2.90667	3.65667	0.91	0.856667	3.88333	4.50333	3.56667	3.57333	3.69667	5.16667	0.00145869	1	1	PF01535 PPR repeat 10-34 52-76 94-118 / PF01535 PPR repeat 10-34 52-76 94-118 / PF01535 PPR repeat 10-34 52-76 94-118 / PF01535 PPR repeat 10-34 52-76 94-118 / PF01535 PPR repeat 10-34 52-76 94-118 / PF01535 PPR repeat 10-34 52-76 94-118 / PF01535 PPR repeat 10-34 52-76 94-118 / PF01535 PPR repeat 10-34 52-76 94-118 / PF01535 PPR repeat 10-34 52-76 94-118 / PF01535 PPR repeat 10-34 52-76 94-118 /…	IPR002885 Pentatricopeptide repeat / IPR011990 Tetratricopeptide-like helical
AT1G47270	8.43667	12.8833	1.52	5.25333	6.38	10.2567	6.98	16.6933	2.82	4.96333	0.00146373	0.0100193	1	PF12937 F-box-like / PF01167 Tub family / PF00646 F-box domain	IPR000007 Tubby, C-terminal / IPR025659 Tubby C-terminal-like domain / IPR001810 F-box domain, cyclin-like / IPR018066 Tubby, C-terminal, conserved site
AT5G25150	7.07667	11.14	8.20333	12.7867	10.37	11.6333	9.53667	11.5767	3.91333	5.22	0.00146988	0.207323	1	PF00400 WD domain, G-beta repeat 893-931 938-975 1109-1147 1194-1232 1236-1273 1277-1315 1319-1357 1361-1399 / PF00400 WD domain, G-beta repeat 893-931 938-975 1109-1147 1194-1232 1236-1273 1277-1315 1319-1357 1361-1399 / PF00400 WD domain, G-beta repeat 893-931 938-975 1109-1147 1194-1232 1236-1273 1277-1315 1319-1357 1361-1399 / PF00400 WD domain, G-beta repeat 893-931 938-975 1109-1147 1194-12…	IPR001680 WD40 repeat / IPR007582 TFIID subunit, WD40-associated region / IPR020472 G-protein beta WD-40 repeat / IPR017986 WD40-repeat-containing domain / IPR019775 WD40 repeat, conserved site / IPR015943 WD40/YVTN repeat-like-containing domain
AT5G54400	0.11	0.983333	2.18667	8.28	0.93	2.12	1.26	6.01	3.46667	20.2567	0.00148934	0.00369942	0.229096	PF08241 Methyltransferase domain	IPR013216 Methyltransferase type 11
AT5G65750	10.68	20.7	13.1267	27.6067	6.87	11.5367	14.54	19.9667	11.61	45.5467	0.00149656	7.73233e-06	0.0222521	PF00676 Dehydrogenase E1 component / PF02779 Transketolase, pyrimidine binding domain	IPR001017 Dehydrogenase, E1 component / IPR005475 Transketolase-like, pyrimidine-binding domain / IPR011603 2-oxoglutarate dehydrogenase, E1 component
AT5G17870	285.13	128.817	52.6667	26.9233	58.3067	29.93	55.5	36.7433	51.2867	25.84	0.00149989	1	1		IPR020526 Ribosomal protein L6, chloroplast
AT4G30750	22.3933	24.5067	19.1467	34.0967	20.4967	28.4233	21.4567	27.39	29.6967	48.6233	0.00150606	0.00044535	1
AT2G13840	3.58333	4.47	7.11333	10.2467	7.05333	10.2167	5.75333	7.22667	6.93	12.33	0.00150621	0.00956265	1	PF02811 PHP domain	IPR004013 PHP, C-terminal / IPR016195 Polymerase/histidinol phosphatase-like / IPR003141 Polymerase/histidinol phosphatase, N-terminal
AT5G58930	10.12	18.7967	9.79	16.82	9.38667	14.5067	14.92	16.5567	14.1667	36.9167	0.00150902	9.47675e-05	0.141144	PF05340 Protein of unknown function (DUF740) / PF05340 Protein of unknown function (DUF740) / PF05340 Protein of unknown function (DUF740)	IPR008004 Uncharacterised protein family UPF0503
AT1G65484	1.44	0.39	17.2367	5.26	11.3467	4.44667	0	0	3.79667	5.78667	0.00150991	1	1
AT1G30320	8.09333	7.55	8.84	8.65333	25.59	7.95333	10.81	7.42	3.2	1.88667	0.00151176	0.700374	0.222207	PF03763 Remorin, C-terminal region	IPR005516 Remorin, C-terminal
AT3G08885	0.116667	0.85	0.333333	2.28333	0.133333	3.18	0.13	0.416667	0.76	5.28	0.00152912	8.73172e-06	0.0660136
AT4G15410	8.28333	9.64333	3.52667	6.13333	4.30333	6.84	7.63	10.4467	5.74667	13.05	0.00153583	0.000424239	1	PF00789 UBX domain / PF08059 SEP domain / PF14555 UBA-like domain	IPR001012 UBX / IPR012989 SEP domain / IPR009060 UBA-like
AT3G45620	14.3167	31.0433	17.8667	42.5167	7.62	10.1667	19.85	21.1633	20.37	72.1067	0.0015368	0.00158036	0.152216	PF00400 WD domain, G-beta repeat 893-931 938-975 1109-1147 1194-1232 1236-1273 1277-1315 1319-1357 1361-1399 / PF00400 WD domain, G-beta repeat 893-931 938-975 1109-1147 1194-1232 1236-1273 1277-1315 1319-1357 1361-1399	IPR001680 WD40 repeat / IPR017986 WD40-repeat-containing domain / IPR015943 WD40/YVTN repeat-like-containing domain
AT3G47295	66.1733	76.9233	42.5567	55.4667	28.9067	70.0633	0.226667	0.316667	73.4333	70.9667	0.00154607	1	1
AT4G30930	8.18667	6.21	7.67	5.88	8.30333	5.58667	9.33667	5.68333	11.59	13.4933	0.00155442	1	1	PF00829 Ribosomal prokaryotic L21 protein	IPR001787 Ribosomal protein L21 / IPR018258 Ribosomal protein L21, conserved site
AT5G19350	18.6	22.32	25.25	31.7033	26.0633	32.22	25.7167	29.21	27.6033	50.4733	0.00155653	0.00629079	1	PF00076 RNA recognition motif. (a.k.a. RRM, RBD, or RNP domain) / PF00076 RNA recognition motif. (a.k.a. RRM, RBD, or RNP domain) / PF00076 RNA recognition motif. (a.k.a. RRM, RBD, or RNP domain)	IPR000504 RNA recognition motif domain / IPR012677 Nucleotide-binding, alpha-beta plait
AT1G68680	13.8833	12.21	11.03	14.3267	3.78	4.49667	13.7833	15.38	12.29	24.5133	0.00155781	1	1
AT5G49510	23.36	22.9967	12.98	11.14	15.1733	13.0333	26.1133	23.9533	28.0867	51.9167	0.00155896	1	1	PF02996 Prefoldin subunit	IPR004127 Prefoldin subunit / IPR016655 Prefoldin, subunit 3 / IPR009053 Prefoldin
AT3G52280	13.93	15.8467	16.25	22.7833	15.4767	19.2133	15.4467	14.77	18.4933	26.2267	0.0015773	0.0135092	1	PF00439 Bromodomain	IPR001487 Bromodomain / IPR017413 Transcription factor GTE6 / IPR027353 NET domain
AT5G45760	4.68333	8.63333	2.17	3.68667	2.46667	3.13667	0.78	1.45333	3.05333	4.49333	0.00158619	1	1	PF00400 WD domain, G-beta repeat 893-931 938-975 1109-1147 1194-1232 1236-1273 1277-1315 1319-1357 1361-1399 / PF00400 WD domain, G-beta repeat 893-931 938-975 1109-1147 1194-1232 1236-1273 1277-1315 1319-1357 1361-1399 / PF00400 WD domain, G-beta repeat 893-931 938-975 1109-1147 1194-1232 1236-1273 1277-1315 1319-1357 1361-1399	IPR001680 WD40 repeat / IPR017986 WD40-repeat-containing domain / IPR015943 WD40/YVTN repeat-like-containing domain / IPR019775 WD40 repeat, conserved site
AT5G44720	48.13	55.4633	36.0633	21.14	32.8733	22.79	34.3233	31.2533	73.22	47.88	0.00158955	1	1	PF03476 MOSC N-terminal beta barrel domain / PF03473 MOSC domain	IPR005303 MOSC, N-terminal beta barrel / IPR005302 Molybdenum cofactor sulfurase, C-terminal / IPR011037 Pyruvate kinase-like, insert domain
AT2G03870	24.44	27.17	16.1167	16.66	11.8	13.6733	4.74	7.16667	6.68	9.67333	0.00159429	1	1	PF01423 LSM domain	IPR001163 Ribonucleoprotein LSM domain / IPR017132 U6 snRNA-associated Sm-like protein LSm7 / IPR010920 Like-Sm (LSM) domain / IPR006649 Ribonucleoprotein LSM domain, eukaryotic/archaea-type
AT5G41910	5.47667	6.09333	2.17667	3.49667	1.27333	1.28333	3.26333	5.95	0.983333	1.24333	0.00159962	1	1	PF09748 Transcription factor subunit Med10 of Mediator complex	IPR019145 Mediator complex, subunit Med10
AT5G52540	28.42	42.62	65.1767	58.3667	64.7567	48.18	40.9433	36.7333	67.5867	71.0533	0.00160079	1	1	PF05684 Protein of unknown function (DUF819)	IPR008537 Protein of unknown function DUF819
AT1G55730	5.55667	9.04333	1.62	3.29667	2.4	3.91333	1.74	3.17333	1.71667	5.18667	0.00160238	0.0351515	1	PF01699 Sodium/calcium exchanger protein / PF01699 Sodium/calcium exchanger protein	IPR004837 Sodium/calcium exchanger membrane region / IPR004713 Calcium/proton exchanger / IPR004798 Calcium/proton exchanger CAX
AT3G48115	19.1367	25.0833	6.64333	15.0333	6.70667	9.40667	13.9	23.0333	14.82	23.12	0.00160536	0.0293803	1
AT1G22880	2.99333	2.97333	1.12333	1.19	0.926667	1.08667	3.28667	3.66667	1.16333	1.60333	0.00160965	1	1	PF00759 Glycosyl hydrolase family 9	IPR001701 Glycoside hydrolase, family 9 / IPR018221 Glycoside hydrolase, family 9, active site / IPR012341 Six-hairpin glycosidase / IPR008928 Six-hairpin glycosidase-like
AT2G24395	24.2667	17.38	21.3733	11.77	17.5867	11.0067	0.05	0	27.2733	16.65	0.00161209	1	1
AT1G69460	50.42	62.9267	54.5367	72.9467	42.3533	44.4933	40.4367	44.76	58.7467	103.897	0.00161333	0.148108	1	PF01105 emp24/gp25L/p24 family/GOLD	IPR009038 GOLD
AT4G15230	0.153333	0.113333	0.206667	0.16	1.21	0.293333	0.296667	0.3	0.41	0.113333	0.00161609	0.113578	0.0788398	PF00005 ABC transporter / PF08370 Plant PDR ABC transporter associated / PF01061 ABC-2 type transporter / PF01061 ABC-2 type transporter / PF00005 ABC transporter / PF00005 ABC transporter / PF14510 ABC-transporter extracellular N-terminal	IPR003439 ABC transporter-like / IPR013581 Plant PDR ABC transporter associated / IPR013525 ABC-2 type transporter / IPR027417 P-loop containing nucleoside triphosphate hydrolase / IPR003593 AAA+ ATPase domain
AT5G02480	38.6967	64.31	24.48	31.44	17.52	37.5433	48.5533	70.1367	51.7267	51.1133	0.00161721	0.231819	1		IPR002068 Alpha crystallin/Hsp20 domain / IPR008978 HSP20-like chaperone
AT3G60520	15.0433	37.3867	18.9167	39.0967	30.0833	53.1067	18.1833	36.2367	10.3233	25.6333	0.00161756	3.20334e-07	1
AT1G14290	23.8333	18.2033	18.41	13.6667	33.4367	16.8567	45.7167	37.7333	21.4933	9.24667	0.00161848	1	1	PF04116 Fatty acid hydroxylase superfamily	IPR006694 Fatty acid hydroxylase
AT5G37590	2.01333	3.00667	1.36667	1.79667	1.38	2.32667	2.57667	2.89	3.70667	5.69	0.00163706	1	1	PF13374 Tetratricopeptide repeat / PF13424 Tetratricopeptide repeat / PF13424 Tetratricopeptide repeat	IPR011990 Tetratricopeptide-like helical / IPR019734 Tetratricopeptide repeat / IPR013026 Tetratricopeptide repeat-containing domain
AT4G02210	4.08333	6.65	1.92667	3.02	2.89333	3.1	5.56	7.39333	2.91	5.70333	0.00164059	0.152646	1	PF12776 Myb/SANT-like DNA-binding domain / PF12776 Myb/SANT-like DNA-binding domain	IPR024752 Myb/SANT-like domain
AT3G24490	7.00667	11.5367	8.82333	13.2833	9.56333	10.21	11.9133	10.9833	13.6067	20.92	0.00164291	0.204432	1	PF13837 Myb/SANT-like DNA-binding domain
AT4G00238	6.23333	6.55333	5.62667	8.34667	6.31	8.36	5.74667	6.39667	6.73	15.0267	0.00165246	0.00103269	0.0307186	PF04504 Protein of unknown function, DUF573	IPR007592 Protein of unknown function DUF573
AT3G43810	69.8733	68.4633	38.9833	33.7533	84.6033	76.22	37.5767	37.9933	76.3033	106.783	0.0016629	1	1	PF13499 EF-hand domain pair / PF13499 EF-hand domain pair	IPR011992 EF-hand-like domain / IPR002048 EF-hand domain / IPR018247 EF-Hand 1, calcium-binding site
AT2G03750	54.5167	54.9233	21.8567	19.7967	10.8333	18.6633	24.4267	20.8067	76.54	57.6267	0.00166583	1	1	PF00685 Sulfotransferase domain	IPR000863 Sulfotransferase domain / IPR027417 P-loop containing nucleoside triphosphate hydrolase
AT3G04440	0.65	0.603333	0.12	0.0566667	0.0233333	0.04	0.05	0.0266667	0.576667	1.00667	0.00167489	1	1	PF04515 Protein of unknown function, DUF580	IPR007603 Choline transporter-like
AT4G09490	3.18333	2.41667	5.87667	3.78667	3.81	3.27667	0.0566667	0.343333	2.55667	2.70667	0.00167743	1	1	PF13456 Reverse transcriptase-like	IPR012337 Ribonuclease H-like domain / IPR002156 Ribonuclease H domain
AT4G29890	9.62333	11.93	6.39	13.1167	14.0167	20.7267	16.1633	25.3433	14.08	33.0967	0.00168296	0.00109267	1	PF00355 Rieske [2Fe-2S] domain / PF00848 Ring hydroxylating alpha subunit (catalytic domain)	IPR017941 Rieske [2Fe-2S] iron-sulphur domain / IPR015879 Aromatic-ring-hydroxylating dioxygenase, alpha subunit, C-terminal domain / IPR001663 Aromatic-ring-hydroxylating dioxygenase, alpha subunit
AT3G26080	20.8367	21.8733	37.1467	42.73	30.0967	34.9433	15.11	17.37	36.4933	65.1433	0.00169461	1	1	PF04755 PAP_fibrillin / PF04755 PAP_fibrillin	IPR006843 Plastid lipid-associated protein/fibrillin conserved domain
AT2G38720	0.623333	0.776667	0.633333	0.36	0.9	0.3	2.74333	1.07333	0.89	0.226667	0.00169827	0.160694	1	PF03999 Microtubule associated protein (MAP65/ASE1 family) / PF03999 Microtubule associated protein (MAP65/ASE1 family)	IPR007145 Microtubule-associated protein, MAP65/Ase1/PRC1
AT4G34265	37.5867	22.7	24.27	16.7833	24.5567	16.2867	40.5467	31.1033	22.99	21.0467	0.00170314	0.0151303	1
AT4G00980	1.64333	1.80333	0.186667	0.0633333	0.13	0.18	3.73333	2.32	0.223333	0.123333	0.00171337	1	1	PF02229 Transcriptional Coactivator p15 (PC4) / PF14227 gag-polypeptide of LTR copia-type / PF08766 DEK C terminal domain	IPR003173 Transcriptional coactivator p15 / IPR014876 DEK, C-terminal / IPR001878 Zinc finger, CCHC-type / IPR009057 Homeodomain-like
AT5G51740	4.35333	6.15667	4.63333	5.20667	5.88333	5.67333	2.63333	3.72	6.44667	10.3633	0.00171913	1	1	PF01435 Peptidase family M48	IPR001915 Peptidase M48
AT5G42850	40.28	57.8267	37.9967	60.6367	42.1433	55.22	4.13333	8.43333	44.4233	109.583	0.00172369	0.341328	1	PF06110 Eukaryotic protein of unknown function (DUF953)	IPR010357 Protein of unknown function DUF953, thioredoxin-like / IPR012336 Thioredoxin-like fold
AT2G04350	24.17	51.9067	19.3567	50.8767	14.4567	47.7733	33.2167	49.4033	48.5733	95.7333	0.00172909	1.26029e-05	1	PF00501 AMP-binding enzyme / PF00501 AMP-binding enzyme	IPR000873 AMP-dependent synthetase/ligase / IPR020845 AMP-binding, conserved site
AT3G06320	12.2933	12.3233	11.8467	9.74	9.25667	9.16	14.22	10.7233	15.4467	32.9033	0.00173081	1	0.281772	PF00471 Ribosomal protein L33	IPR001705 Ribosomal protein L33 / IPR011332 Ribosomal protein, zinc-binding domain
AT5G57685	6.73667	12.4067	10.0067	12.9567	7.04	13.1967	5.31333	10.6367	1.58	4.19333	0.0017383	0.00286842	1
AT1G54160	1.33	7.27	2.09333	14.14	3.71333	15.2167	2.25	11.4633	6.30333	26.84	0.0017436	5.61876e-08	1	PF02045 CCAAT-binding transcription factor (CBF-B/NF-YA) subunit B	IPR001289 CCAAT-binding transcription factor, subunit B / IPR018362 CCAAT-binding factor, conserved site
AT5G67210	2.75333	2.64333	3.16333	2.95	12.8867	3.8	4.02333	2.89	5.28333	3.7	0.00174543	0.11507	0.0406167	PF04669 Protein of unknown function (DUF579)	IPR021148 Putative polysaccharide biosynthesis protein / IPR006514 Xylan biosynthesis protein IRX15/IRX15L
AT5G41070	4.39	4.47333	8.31667	8.57	5.17	5.08333	2.66667	2.60333	11.9633	20.3667	0.00175413	1	1	PF00035 Double-stranded RNA binding motif / PF00035 Double-stranded RNA binding motif	IPR001159 Double-stranded RNA-binding / IPR014720 Double-stranded RNA-binding-like domain
AT5G20080	37.82	46.1	34.0167	33.9433	39.83	36.9233	40.99	41.04	46.2533	55.4333	0.00177065	1	1	PF00175 Oxidoreductase NAD-binding domain / PF00970 Oxidoreductase FAD-binding domain	IPR008333 Oxidoreductase, FAD-binding domain / IPR001433 Oxidoreductase FAD/NAD(P)-binding / IPR017938 Riboflavin synthase-like beta-barrel / IPR001834 NADH:cytochrome b5 reductase (CBR) / IPR001709 Flavoprotein pyridine nucleotide cytochrome reductase / IPR017927 Ferredoxin reductase-type FAD-binding domain
AT1G74640	32.3	34.9633	43.3467	34.37	48.5333	37.4767	45.5167	33.1567	16.5767	11.1733	0.00177701	1	1	PF12697 Alpha/beta hydrolase family
AT3G15690	42.2733	39.1033	34.4767	29.2233	35.2833	32.7167	40.9167	40.71	44.0167	40.0633	0.00179163	1	1	PF00364 Biotin-requiring enzyme	IPR000089 Biotin/lipoyl attachment
AT1G10790	0.123333	0.213333	0.76	1.26333	0.11	0.176667	0.213333	0	0.206667	0.13	0.00180484	1	1
AT1G63070	0	0.05	0.336667	0.326667	1.60333	1.26333	1.19667	1.2	0.0566667	0.536667	0.00180939	1	1	PF01535 PPR repeat 10-34 52-76 94-118 / PF12854 PPR repeat / PF12854 PPR repeat / PF13041 PPR repeat family / PF13041 PPR repeat family / PF13041 PPR repeat family / PF13041 PPR repeat family / PF13041 PPR repeat family / PF13812 Pentatricopeptide repeat domain / PF13812 Pentatricopeptide repeat domain	IPR002885 Pentatricopeptide repeat / IPR011990 Tetratricopeptide-like helical
AT3G24360	0.36	1.18333	1.62667	3.81	1.05667	2.64	0.286667	1.02667	1.92667	4.72	0.00181424	0.00236705	1	PF13766 2-enoyl-CoA Hydratase C-terminal region
AT4G30870	0.706667	1.42333	0.9	1.60667	1.56667	1.67	3.70667	3.55667	1.81667	2.46333	0.0018186	1	1	PF02732 ERCC4 domain / PF02732 ERCC4 domain	IPR006166 ERCC4 domain / IPR020819 DNA repair nuclease, XPF-type/Helicase / IPR011335 Restriction endonuclease type II-like
AT4G00231	5.5	5.64667	4.7	6.05667	6.07333	5.63333	2.64	2.88333	6.55	9.12333	0.00182636	1	1	PF09759 Spinocerebellar ataxia type 10 protein domain	IPR019156 Ataxin-10 domain / IPR016024 Armadillo-type fold / IPR011989 Armadillo-like helical
AT1G78080	71.6733	62.3767	97.0467	50.53	94.8533	54.4767	122.67	67.3733	42.03	49.1067	0.00182649	0.000180544	0.17091	PF00847 AP2 domain / PF00847 AP2 domain	IPR001471 AP2/ERF domain / IPR016177 DNA-binding, integrase-type
AT1G53880	5.16667	5.35667	1.60333	1.14	2.77333	1.65	1.62	1.47	2.47667	1.63	0.00183096	1	1	PF04525 Protein of unknown function (DUF567) / PF01008 Initiation factor 2 subunit family	IPR007612 LURP1-like domain / IPR000649 Initiation factor 2B-related / IPR025659 Tubby C-terminal-like domain
AT1G77480	8.42667	12.34	10.19	16.0733	9.96333	16.6067	9.14	13.12	13.8233	26.6767	0.00184539	8.43658e-05	1	PF00026 Eukaryotic aspartyl protease / PF14543 Xylanase inhibitor N-terminal / PF14541 Xylanase inhibitor C-terminal	IPR001461 Peptidase A1 / IPR021109 Aspartic peptidase / IPR001969 Peptidase aspartic, active site
AT1G23040	4.99	6.10333	6.24	11.4267	5.50667	10.13	2.25667	2.17333	1.49333	4.19333	0.00187824	0.650518	1
AT4G06536	3.75	3.09	0.0766667	0.276667	0	0.223333	0.356667	0.44	0	0.243333	0.00189652	1	1	PF00622 SPRY domain	IPR003877 SPla/RYanodine receptor SPRY / IPR008985 Concanavalin A-like lectin/glucanases superfamily / IPR001870 B30.2/SPRY domain
AT4G27390	18.9	27.22	8.99333	17.2367	10.2967	14.66	20.5433	29.8833	18.0467	31.3767	0.00189686	0.00293098	1
AT1G29930	24636.5	20965.2	23800.1	22083.9	28247.2	23280.6	15541.7	18893	16922.5	6565.63	0.00189786	1	1	PF00504 Chlorophyll A-B binding protein	IPR022796 Chlorophyll A-B binding protein / IPR001344 Chlorophyll A-B binding protein, plant / IPR023329 Chlorophyll a/b binding protein domain
AT3G23110	4.68	10.2067	0.0666667	0	6.18667	5.86	3.81667	1.39667	5.71667	9.47333	0.00190852	1	1	PF08263 Leucine rich repeat N-terminal domain / PF13516 Leucine Rich repeat / PF13516 Leucine Rich repeat / PF13516 Leucine Rich repeat / PF00560 Leucine Rich Repeat 17-38 40-61 / PF12799 Leucine Rich repeats (2 copies) / PF12799 Leucine Rich repeats (2 copies)	IPR013210 Leucine-rich repeat-containing N-terminal, type 2 / IPR001611 Leucine-rich repeat / IPR025875 Leucine rich repeat 4 / IPR003591 Leucine-rich repeat, typical subtype
AT5G38520	132.93	102.923	217.103	155.27	118.317	103.13	206.447	192.433	168.503	58.2167	0.0019163	0.110949	1	PF12697 Alpha/beta hydrolase family	IPR000073 Alpha/beta hydrolase fold-1
AT3G58150	0.17	0.223333	0.156667	1.80333	0.196667	0.926667	0.393333	0.37	0.316667	3.70333	0.00191728	0.000240773	0.00273016	PF07047 Optic atrophy 3 protein (OPA3)	IPR010754 Optic atrophy 3-like
AT3G01910	69.7767	84.47	69.0533	88.6467	78.8967	86.0567	61.0967	74.4467	80.1067	101.447	0.00191995	2.86269e-05	1	PF00174 Oxidoreductase molybdopterin binding domain / PF03404 Mo-co oxidoreductase dimerisation domain	IPR005066 Moybdenum cofactor oxidoreductase, dimerisation / IPR000572 Oxidoreductase, molybdopterin-binding domain / IPR008335 Eukaryotic molybdopterin oxidoreductase / IPR014756 Immunoglobulin E-set
AT4G37130	6.53333	5.97	5.17667	5.22333	8.35	8.45333	5.02	3.73333	9.56333	8.60667	0.00192381	1	1
AT3G29180	8.02	7.93	9.39333	10.84	8.42667	9.39	11.15	9.45	5.46	4.94	0.00192767	1	1	PF07059 Protein of unknown function (DUF1336)	IPR009769 Domain of unknown function DUF1336
AT1G01630	26.9033	28.8033	17.9867	19.0433	24.3767	25.09	27.7133	30.3467	19.2067	38.98	0.00193508	0.0307849	0.00814057	PF00650 CRAL/TRIO domain / PF03765 CRAL/TRIO, N-terminus	IPR001251 CRAL-TRIO domain / IPR011074 CRAL/TRIO, N-terminal domain
AT4G26455	7.11667	11.16	8.08	10.6933	8.77667	9.22	6.49333	4.74	9.34	16.9067	0.00193887	0.363898	0.889397
AT4G02220	8.79333	10.22	3.16667	3.00333	3.03667	2.8	15.2667	8.52333	3.52333	5.29667	0.00193903	1	1	PF01753 MYND finger / PF04194 Programmed cell death protein 2, C-terminal putative domain	IPR002893 Zinc finger, MYND-type / IPR007320 Programmed cell death protein 2, C-terminal
AT1G66940	31.1367	34.65	12.05	12.05	62.95	50.0667	19.0667	19.0967	15.8	42.4533	0.00194129	1	1	PF14380 Wall-associated receptor kinase C-terminal / PF14380 Wall-associated receptor kinase C-terminal / PF13947 Wall-associated receptor kinase galacturonan-binding	IPR025287 Wall-associated receptor kinase galacturonan-binding domain
AT2G34810	5.37333	10.0333	1.89	6.59	2.89667	8.23333	12.9867	12.8867	6.63667	4.78333	0.00194224	1	1	PF01565 FAD binding domain / PF08031 Berberine and berberine like	IPR006094 FAD linked oxidase, N-terminal / IPR012951 Berberine/berberine-like / IPR016169 CO dehydrogenase flavoprotein-like, FAD-binding, subdomain 2 / IPR016166 FAD-binding, type 2
AT5G16740	0	0	0	0.276667	0	0.15	0	0.0266667	0.0266667	1.23333	0.00194325	0.00969441	0.0040933	PF01490 Transmembrane amino acid transporter protein	IPR013057 Amino acid transporter, transmembrane
AT5G05890	3.34	0.886667	0.5	0.543333	3.92667	2.11	0.826667	1.11667	0.233333	0.02	0.00194571	1	1	PF00201 UDP-glucoronosyl and UDP-glucosyl transferase	IPR002213 UDP-glucuronosyl/UDP-glucosyltransferase
AT5G07842	9.95333	11.64	4.98333	6.21333	10.69	12.3967	10.9067	13.0933	2.1	3.16	0.00195494	1	1
AT4G15950	5.86333	5.82333	3.29	3.38	1.09333	1.8	6.19667	8.25667	3.36333	6.13667	0.00195847	1	1	PF03874 RNA polymerase Rpb4	IPR005574 RNA polymerase II, Rpb4 / IPR010997 HRDC-like
AT1G32928	8.00667	9.4	9.85	7.56	10.55	10.7167	0.876667	1.04667	0.656667	0	0.0019742	1	1
AT1G78490	7.38	19.5567	8.55667	22.1733	11.06	18.62	5.27333	12.7367	18.08	38.3533	0.00198117	9.29036e-05	1	PF00067 Cytochrome P450	IPR001128 Cytochrome P450 / IPR002401 Cytochrome P450, E-class, group I / IPR017972 Cytochrome P450, conserved site
AT3G13470	39.8067	13.4333	59.7133	15.9533	48.5767	24.2167	48.11	12.98	90.87	38.5633	0.00198867	1.76562e-07	1	PF00118 TCP-1/cpn60 chaperonin family / PF00118 TCP-1/cpn60 chaperonin family	IPR002423 Chaperonin Cpn60/TCP-1 / IPR027409 GroEL-like apical domain / IPR001844 Chaperonin Cpn60 / IPR027413 GroEL-like equatorial domain / IPR018370 Chaperonin Cpn60, conserved site
AT3G15220	5.71	9.7	6.72	12.4167	8.86667	12.3767	7.82	10.3967	9.35667	19.3833	0.0020002	3.86524e-06	1	PF00069 Protein kinase domain	IPR000719 Protein kinase, catalytic domain / IPR011009 Protein kinase-like domain / IPR017441 Protein kinase, ATP binding site / IPR002290 Serine/threonine- / dual specificity protein kinase, catalytic domain / IPR020635 Tyrosine-protein kinase, catalytic domain
AT3G14160	2.92333	3.35	1.51667	1.75333	1.34333	1.5	1.75667	1.22667	0.56	0.826667	0.00200991	1	1	PF13532 2OG-Fe(II) oxygenase superfamily	IPR005123 Oxoglutarate/iron-dependent dioxygenase / IPR027450 Alpha-ketoglutarate-dependent dioxygenase AlkB-like
AT5G14565	7.35667	14.0067	11.7467	11.5	20.7767	35.9533	5.63	5.26	9.78	8.82	0.0020114	1	1
AT1G72020	164.163	161.307	144.913	197.563	33.9933	38.2867	138.457	181.793	133.563	251.973	0.00201944	1	1
AT4G33040	6.65667	14.4133	3.60333	19.1	1.53667	13.35	2.90667	10.92	5.12	95.7667	0.00203152	0.00146307	0.00372326	PF00462 Glutaredoxin	IPR002109 Glutaredoxin / IPR012336 Thioredoxin-like fold / IPR011905 Glutaredoxin-like, plant II
AT2G36590	2.17667	2.72333	13.95	5.75333	26.1933	8.74	9.85333	2.51667	17.9533	5.43333	0.00203177	0.000314467	1	PF01490 Transmembrane amino acid transporter protein	IPR013057 Amino acid transporter, transmembrane
AT2G25964	5.72667	13.4733	25.51	44.6033	24.88	57.4367	63.9833	166.067	37.1433	94.81	0.00203661	0.0749809	1
AT1G61240	5.22333	14.4167	5.28667	14.8733	13.53	24.8933	5.91667	11.5	1.94333	5.92667	0.00204057	0.00152986	1	PF05212 Protein of unknown function (DUF707)	IPR007877 Protein of unknown function DUF707
AT4G15070	0.47	0.94	0.55	0.453333	0.696667	0.193333	0.856667	0.276667	1.88	1.82	0.00205888	1	1	PF03107 C1 domain / PF03107 C1 domain / PF03107 C1 domain / PF07649 C1-like domain / PF07649 C1-like domain	IPR004146 DC1 / IPR011424 C1-like
AT1G71990	1.59333	1.36333	6.91	7.75	8.40333	6.35333	8.14	6.93	6.79	7.89667	0.00206488	1	1	PF00852 Glycosyltransferase family 10 (fucosyltransferase) / PF00852 Glycosyltransferase family 10 (fucosyltransferase)	IPR001503 Glycosyl transferase, family 10 / IPR017177 Alpha-(1, 3)-fucosyltransferase/alpha-(1, 4)-fucosyltransferase, plant
AT5G47240	23.5167	34.8133	16.88	26.7067	182.207	43.5633	19.87	54.03	13.2	7.8	0.00207093	1	0.0284658	PF00293 NUDIX domain	IPR000086 NUDIX hydrolase domain / IPR015797 NUDIX hydrolase domain-like / IPR003293 Nudix hydrolase 6-like / IPR020084 NUDIX hydrolase, conserved site
AT2G31740	7.76333	8.4	10.8567	11.1967	11.5533	12.2433	11.5467	6.6	14.49	19.07	0.00207185	1	1	PF08241 Methyltransferase domain	IPR013216 Methyltransferase type 11
AT1G74150	0.146667	0.09	0.123333	0.326667	0.15	0.166667	0.3	0.386667	0.973333	0.883333	0.00207333	1	1	PF13415 Galactose oxidase, central domain / PF13418 Galactose oxidase, central domain / PF13418 Galactose oxidase, central domain / PF13854 Kelch motif	IPR015915 Kelch-type beta propeller
AT1G27520	10.8467	12.1567	8.75333	13.6167	10.2933	10.6567	13.1533	15.1133	12.7633	19.8833	0.00208675	0.00891303	1	PF01532 Glycosyl hydrolase family 47	IPR001382 Glycoside hydrolase, family 47
AT2G28130	3.05	4.16667	2.32667	2.86333	3.4	4.41	0.586667	1.46333	3.82667	4.52333	0.00209094	1	1
AT5G59670	10.22	32.24	2.16	3.38667	2.54333	3.38333	31.46	23.2567	0.0833333	0.1	0.00209778	1	1	PF00069 Protein kinase domain / PF12819 Carbohydrate-binding protein of the ER / PF12799 Leucine Rich repeats (2 copies)	IPR000719 Protein kinase, catalytic domain / IPR024788 Malectin-like carbohydrate-binding domain / IPR025875 Leucine rich repeat 4 / IPR002290 Serine/threonine- / dual specificity protein kinase, catalytic domain / IPR020635 Tyrosine-protein kinase, catalytic domain / IPR017441 Protein kinase, ATP binding site / IPR008271 Serine/threonine-protein kinase, active site / IPR011009 Protein kinase-lik…
AT3G10760	16.6067	15.5767	6.56667	6.23	12.56	18.23	18.32	17.49	17.3167	22.23	0.00211534	1	1	PF00249 Myb-like DNA-binding domain	IPR001005 SANT/Myb domain / IPR009057 Homeodomain-like / IPR006447 Myb domain, plants / IPR017930 Myb domain
AT2G20340	10.5467	25.43	7.26	10.1433	7.42	10.7067	12.9233	25.5867	31.18	32.0333	0.00212302	1	1	PF00282 Pyridoxal-dependent decarboxylase conserved domain	IPR002129 Pyridoxal phosphate-dependent decarboxylase / IPR015421 Pyridoxal phosphate-dependent transferase, major region, subdomain 1 / IPR015422 Pyridoxal phosphate-dependent transferase, major region, subdomain 2 / IPR015424 Pyridoxal phosphate-dependent transferase / IPR021115 Pyridoxal-phosphate binding site / IPR010977 Aromatic-L-amino-acid decarboxylase
AT3G43715	1.10667	0.606667	0.0566667	0.0433333	0.05	0.0833333	0	0	0	0	0.00213043	1	1
AT4G38290	0.713333	0.823333	1.11	1.33667	6.6	7.20667	0.9	0.3	0.513333	1.37333	0.0021581	1	1	PF03006 Haemolysin-III related / PF03006 Haemolysin-III related	IPR004254 Hly-III-related
AT5G38150	8.79	14.8767	0.84	0.923333	1.10333	1.00667	10.7133	8.04	12.9967	13.8633	0.00217549	1	1	PF05701 Weak chloroplast movement under blue light / PF05701 Weak chloroplast movement under blue light	IPR008545 Protein of unknown function DUF827, plant
AT2G39330	5.90667	11.2267	38.5767	25.0267	41.98	47.45	22.5733	19.0233	64.5467	28.8267	0.00217681	1	1	PF01419 Jacalin-like lectin domain / PF01419 Jacalin-like lectin domain / PF01419 Jacalin-like lectin domain	IPR001229 Mannose-binding lectin
AT4G14820	0.176667	0.4	0.25	0.466667	1.01667	1.13667	0.876667	0.8	0.52	0.813333	0.00218598	1	1	PF14432 DYW family of nucleic acid deaminases / PF01535 PPR repeat 10-34 52-76 94-118 / PF01535 PPR repeat 10-34 52-76 94-118 / PF01535 PPR repeat 10-34 52-76 94-118 / PF01535 PPR repeat 10-34 52-76 94-118 / PF01535 PPR repeat 10-34 52-76 94-118 / PF01535 PPR repeat 10-34 52-76 94-118 / PF01535 PPR repeat 10-34 52-76 94-118 / PF01535 PPR repeat 10-34 52-76 94-118 / PF12854 PPR repeat / PF01535 PP…	IPR002885 Pentatricopeptide repeat / IPR011990 Tetratricopeptide-like helical
AT3G60930	1.40333	0.79	0.136667	0	0	0	0	0	0	0	0.00219099	1	1
AT5G27730	9.72333	12.0267	13.3767	20.25	14.77	18.8067	16.79	21.91	15.7133	22.6333	0.0021935	0.00107515	1	PF07786 Protein of unknown function (DUF1624)	IPR012429 Protein of unknown function DUF1624
AT4G27060	7.18	10.49	2.97667	4.43667	3.28333	4.41333	8.06667	9.52	5.35333	7.16667	0.00219903	1	1		IPR016024 Armadillo-type fold / IPR011989 Armadillo-like helical
AT1G68920	6.54333	11.35	2.97	5.41	7.58667	10.5267	8.61	10.5933	3.86	6.84667	0.00220234	0.0174136	1	PF00010 Helix-loop-helix DNA-binding domain	IPR011598 Myc-type, basic helix-loop-helix (bHLH) domain
AT3G51450	12.55	13.47	12.6267	19.72	102.8	39.5833	22.9267	31.2467	35.2967	24.6	0.00220274	1	1	PF03088 Strictosidine synthase	IPR018119 Strictosidine synthase, conserved region / IPR011042 Six-bladed beta-propeller, TolB-like
AT5G24450	15.0533	22.9467	17.4467	29.4933	24.5067	27.96	20.7633	27.35	9.80667	16.28	0.00220916	0.00266039	1	PF09734 RNA polymerase III transcription factor (TF)IIIC subunit	IPR019136 Transcription factor IIIC, subunit 5
AT4G29260	19.7733	23.8033	19.3367	21.6967	22.09	21.18	10.9733	13.7467	11.6933	17.0533	0.00221217	1	1	PF03767 HAD superfamily, subfamily IIIB (Acid phosphatase)	IPR005519 Acid phosphatase (Class B) / IPR023214 HAD-like domain / IPR010028 Acid phosphatase, plant / IPR014403 Vegetative storage protein/acid phosphatase
AT4G00955	6.52	8.47	0.896667	0.77	0.87	1.12667	7.52667	3.27	1.88667	2.33	0.00221463	1	1
AT5G16980	0.97	1.79	0	0.203333	0	0.0633333	1.41333	1.57667	0	0.0266667	0.0022173	1	1	PF00107 Zinc-binding dehydrogenase	IPR013149 Alcohol dehydrogenase, C-terminal / IPR016040 NAD(P)-binding domain / IPR002085 Alcohol dehydrogenase superfamily, zinc-type / IPR011032 GroES-like
AT1G09680	0.423333	1.48	0.133333	0.273333	0.12	0.116667	0.173333	0.213333	0.0933333	0.193333	0.0022234	1	1	PF01535 PPR repeat 10-34 52-76 94-118 / PF01535 PPR repeat 10-34 52-76 94-118 / PF01535 PPR repeat 10-34 52-76 94-118 / PF01535 PPR repeat 10-34 52-76 94-118 / PF01535 PPR repeat 10-34 52-76 94-118 / PF01535 PPR repeat 10-34 52-76 94-118 / PF01535 PPR repeat 10-34 52-76 94-118 / PF01535 PPR repeat 10-34 52-76 94-118 / PF01535 PPR repeat 10-34 52-76 94-118 / PF12854 PPR repeat / PF12854 PPR repeat…	IPR002885 Pentatricopeptide repeat
AT4G25300	8.70333	9.02667	1.72333	3.05333	1.53667	3.02	3.65667	2.88	2.93	5.68	0.00222515	1	1	PF03171 2OG-Fe(II) oxygenase superfamily / PF14226 non-haem dioxygenase in morphine synthesis N-terminal	IPR005123 Oxoglutarate/iron-dependent dioxygenase / IPR026992 Non-haem dioxygenase N-terminal domain / IPR027443 Isopenicillin N synthase-like
AT3G15510	8.06667	10.5933	2.12333	3	2.19333	2.76667	3.16	2.33	3.86333	15.26	0.00223646	1	1	PF02365 No apical meristem (NAM) protein	IPR003441 No apical meristem (NAM) protein
AT1G35140	11.5267	29.7467	1.1	2.84	8.36667	57.39	6.39333	34.0967	6.93333	5.37667	0.00225896	0.000594968	0.0441948	PF04674 Phosphate-induced protein 1 conserved region	IPR006766 Phosphate-induced protein 1
AT2G45510	2.61667	8.84667	0.953333	3.49667	5.17	6.65	3.69333	4.71	4.51	26.2533	0.00227216	0.00754557	0.0267092	PF00067 Cytochrome P450	IPR001128 Cytochrome P450 / IPR002401 Cytochrome P450, E-class, group I / IPR017972 Cytochrome P450, conserved site
AT2G17030	3.34	7.27	4.66333	8.20667	5.04333	6.44	6	6.59667	7.00333	13.9933	0.00227281	0.000369188	1	PF03478 Protein of unknown function (DUF295)	IPR005174 Protein of unknown function DUF295 / IPR001810 F-box domain, cyclin-like
AT2G21850	0.8	1.52	0	0	0	0.0266667	0	0	0	0	0.00227534	1	1	PF03107 C1 domain / PF07649 C1-like domain / PF07649 C1-like domain / PF07649 C1-like domain / PF07649 C1-like domain / PF07649 C1-like domain	IPR004146 DC1 / IPR011424 C1-like / IPR002219 Protein kinase C-like, phorbol ester/diacylglycerol binding / IPR019786 Zinc finger, PHD-type, conserved site / IPR001965 Zinc finger, PHD-type / IPR013083 Zinc finger, RING/FYVE/PHD-type
AT1G28570	3.06	6.31667	4.52333	9.55	4.99	15.14	2	4.66667	8.49333	39.6067	0.00229966	0.0134164	0.39904	PF00657 GDSL-like Lipase/Acylhydrolase	IPR001087 Lipase, GDSL / IPR013831 SGNH hydrolase-type esterase domain
AT4G16850	4.13	4.93667	4.27	4.78333	1.51667	1.61667	1.92667	1.32667	1.2	2.01	0.00231182	1	1
AT5G24690	58.4633	51.04	68.1233	64.36	38.3767	34.5233	81.0267	60.5733	82.1567	70.2733	0.00231471	1	1	PF11891 Domain of unknown function (DUF3411)	IPR021825 Protein of unknown function DUF3411
AT4G28640	7.07333	11.81	8.54	18.78	8.03667	10.92	7.96333	12.8667	9.76	29.3333	0.00231727	8.95399e-06	0.0938558	PF02309 AUX/IAA family	IPR003311 AUX/IAA protein / IPR011525 Aux/IAA-ARF-dimerisation
AT1G52870	190.923	223.813	198.623	266.123	135.623	215.847	58.8233	49.5333	263.423	352.937	0.00232846	1	1		IPR007248 Mpv17/PMP22
AT4G30993	49.4333	39.4067	43.2933	38.7133	7.4	9.22667	44.8033	47.29	52.3433	51.52	0.00233109	1	1
AT4G29400	5.83667	7.45667	9.30667	11.1867	22.15	23.5467	10.2833	11.0767	10.0633	12.66	0.00235021	1	1	PF12049 Protein of unknown function (DUF3531)	IPR021920 Protein of unknown function DUF3531
AT4G00230	8.52667	6.55	9.32333	7.3	7.44667	6.67	1.58333	1.36	6.43333	5.24333	0.00236665	1	1	PF05922 Peptidase inhibitor I9 / PF00082 Subtilase family	IPR010259 Proteinase inhibitor I9 / IPR000209 Peptidase S8/S53 domain / IPR023828 Peptidase S8, subtilisin, Ser-active site / IPR015500 Peptidase S8, subtilisin-related
AT5G22608	1.51667	2.29333	0	0.0466667	0	0	2.74	5.68333	3.68	10.67	0.00238233	1	1
AT1G08360	213.023	134.763	184.837	142.133	200.477	140.587	217.067	150.19	247.373	342.123	0.00238277	1	1	PF00687 Ribosomal protein L1p/L10e family	IPR002143 Ribosomal protein L1 / IPR023674 Ribosomal protein L1, superfamily / IPR016094 Ribosomal protein L1, 2-layer alpha/beta-sandwich / IPR016095 Ribosomal protein L1, 3-layer alpha/beta-sandwich / IPR023673 Ribosomal protein L1, conserved site
AT3G03550	6.12667	8.11	6.6	7.50333	7.89	7.97333	4.39	5.19667	6.09667	11.8733	0.00238344	0.0162659	0.283382	PF13639 Ring finger domain / PF13639 Ring finger domain	IPR001841 Zinc finger, RING-type / IPR013083 Zinc finger, RING/FYVE/PHD-type
AT4G32940	57.9867	236.727	59.5833	399.223	88.64	341.92	92.9067	236.017	44.53	1164.83	0.00240872	1.95838e-06	0.000735106	PF01650 Peptidase C13 family	IPR001096 Peptidase C13, legumain
AT3G01920	24.4733	24.05	17.8933	15.2067	14.64	12.6167	25.2167	25.5133	17.18	13.5267	0.00241201	1	1	PF01300 yrdC domain	IPR006070 YrdC-like domain / IPR017945 DHBP synthase RibB-like alpha/beta domain
AT3G29760	7.24333	14.8767	10.3867	11.66	10.1033	11.6433	12.1433	9.28	0.99	2.65333	0.00241341	1	1	PF03031 NLI interacting factor-like phosphatase	IPR004274 NLI interacting factor / IPR023214 HAD-like domain
AT5G02680	1.78	3.25667	2.85333	3.61667	1.67	1.29	2.44667	2.68333	0.07	0.28	0.00243832	1	1
AT5G27660	2.57667	1.28667	2	1.21333	2.43	1.11333	3.83667	3.14333	0.363333	0.466667	0.00244479	1	1	PF13180 PDZ domain / PF13365 Trypsin-like peptidase domain	IPR001478 PDZ domain / IPR009003 Trypsin-like cysteine/serine peptidase domain / IPR001940 Peptidase S1C
AT1G16030	1.34333	2.18333	2.27	4.05667	2.85667	4.22333	2.62	3.51667	2.87333	5.75	0.0024475	0.000145871	1	PF00012 Hsp70 protein	IPR013126 Heat shock protein 70 family / IPR018181 Heat shock protein 70, conserved site
AT2G21080	6.46667	4.28333	6.41	3.86333	4.87	2.63333	7.23	5.98333	1.56667	0.93	0.00245036	1	1	PF12056 Protein of unknown function (DUF3537) / PF12056 Protein of unknown function (DUF3537)	IPR021924 Protein of unknown function DUF3537
AT5G40830	8.98667	8.17667	10.6633	9.69	10.26	10.32	2.36	2.18667	7.76	10.4333	0.00245156	1	1	PF03141 Putative methyltransferase	IPR004159 Putative S-adenosyl-L-methionine-dependent methyltransferase
AT5G24570	18.75	12.4333	15.8	8.18667	8.54667	6.65	5.07667	6.01667	0.31	0.306667	0.00245672	1	1
AT2G24850	27.5667	33.8333	7.00333	15.8033	124.7	17.6733	10.0267	1.48	36.9467	14.3667	0.00246456	0.518001	0.0081575	PF00155 Aminotransferase class I and II	IPR004839 Aminotransferase, class I/classII / IPR005958 Tyrosine/nicotianamine aminotransferase / IPR015421 Pyridoxal phosphate-dependent transferase, major region, subdomain 1 / IPR015422 Pyridoxal phosphate-dependent transferase, major region, subdomain 2 / IPR015424 Pyridoxal phosphate-dependent transferase / IPR021178 Tyrosine transaminase
AT1G49950	18.1067	21.79	17.8633	22.3467	23.2433	25.31	16.3667	19.0667	23.7933	40.64	0.00247161	0.191015	1	PF00249 Myb-like DNA-binding domain / PF00538 linker histone H1 and H5 family	IPR001005 SANT/Myb domain / IPR005818 Histone H1/H5 / IPR009057 Homeodomain-like / IPR011991 Winged helix-turn-helix DNA-binding domain / IPR017930 Myb domain
AT5G49630	32.9433	63.3733	41.62	54.4167	30.7	37.4967	25.0333	34.3333	41.64	104.503	0.00247198	0.0016653	0.679014	PF01490 Transmembrane amino acid transporter protein / PF01490 Transmembrane amino acid transporter protein	IPR013057 Amino acid transporter, transmembrane
AT5G22440	53.0533	30.3433	53.3733	33.1	44.1867	26.1267	53.2067	23.4367	71.58	56.96	0.00247327	3.14685e-05	1	PF00687 Ribosomal protein L1p/L10e family / PF00687 Ribosomal protein L1p/L10e family	IPR002143 Ribosomal protein L1 / IPR016094 Ribosomal protein L1, 2-layer alpha/beta-sandwich / IPR016095 Ribosomal protein L1, 3-layer alpha/beta-sandwich / IPR023674 Ribosomal protein L1, superfamily / IPR023673 Ribosomal protein L1, conserved site
AT5G58900	9.15667	8.36667	1.77	2.28	9.61	14.1767	10.6667	11.7967	6.61333	8.40667	0.00247882	1	1	PF00249 Myb-like DNA-binding domain	IPR001005 SANT/Myb domain / IPR017884 SANT domain / IPR017930 Myb domain / IPR009057 Homeodomain-like / IPR006447 Myb domain, plants
AT1G50950	1.37333	2.95	2.74333	5.82	1.98667	2.65333	1.58333	2.62667	4.18667	7.97333	0.00250609	0.0445814	1	PF07970 Protein of unknown function (DUF1692) / PF00085 Thioredoxin / PF13850 Endoplasmic Reticulum-Golgi Intermediate Compartment (ERGIC) / PF13850 Endoplasmic Reticulum-Golgi Intermediate Compartment (ERGIC)	IPR012936 Endoplasmic reticulum vesicle transporter, C-terminal / IPR013766 Thioredoxin domain / IPR012336 Thioredoxin-like fold
AT3G14650	52.7033	47.0733	31.7767	27.1567	0.0666667	0.08	50.63	27.7967	73.2833	61.42	0.00251444	1	1	PF00067 Cytochrome P450	IPR001128 Cytochrome P450 / IPR002401 Cytochrome P450, E-class, group I
AT5G11930	0.453333	5.69667	2.15667	9.98333	0.21	1.91	0.906667	3.46333	4.34333	45.9133	0.00251455	0.0356436	0.0407399	PF00462 Glutaredoxin	IPR002109 Glutaredoxin / IPR012336 Thioredoxin-like fold / IPR011905 Glutaredoxin-like, plant II
AT3G27180	7.59333	6.97	11.7267	9.34667	15.3433	13.2867	17.6433	11.6733	17.1	15.6433	0.00252878	1	1	PF03602 Conserved hypothetical protein 95 / PF03602 Conserved hypothetical protein 95	IPR004398 RNA methyltransferase, RsmD
AT5G20890	39.1933	37.74	44.3567	40.6667	59.5267	50.8533	27.2167	25.2	26.2833	39.9833	0.00253012	1	1	PF00118 TCP-1/cpn60 chaperonin family	IPR002423 Chaperonin Cpn60/TCP-1 / IPR017998 Chaperone tailless complex polypeptide 1 (TCP-1) / IPR027409 GroEL-like apical domain / IPR012716 T-complex protein 1, beta subunit / IPR002194 Chaperonin TCP-1, conserved site / IPR027413 GroEL-like equatorial domain / IPR027410 TCP-1-like chaperonin intermediate domain
AT3G26100	14.9533	23.2733	19.8667	29.92	13.8533	16.7967	20.2767	24.1133	6.00333	22.41	0.00254745	3.12282e-05	1	PF00415 Regulator of chromosome condensation (RCC1) 630-677 / PF00415 Regulator of chromosome condensation (RCC1) 630-677 / PF00415 Regulator of chromosome condensation (RCC1) 630-677 / PF00415 Regulator of chromosome condensation (RCC1) 630-677 / PF00415 Regulator of chromosome condensation (RCC1) 630-677 / PF00415 Regulator of chromosome condensation (RCC1) 630-677 / PF00415 Regulator of chromo…	IPR000408 Regulator of chromosome condensation, RCC1 / IPR009091 Regulator of chromosome condensation 1/beta-lactamase-inhibitor protein II
AT5G38720	9.05	5.96	9.67333	6.77667	10.41	5.64667	2.55333	1.27667	11.0867	14.59	0.00255279	1	1	PF12923 Ribosomal RNA-processing protein 7 (RRP7)	IPR024326 Ribosomal RNA-processing protein 7
AT1G72920	13.4733	23.14	0.356667	0	0.603333	1.56	0.806667	1.18	1.37	1.07667	0.00256201	1	1	PF01582 TIR domain	IPR000157 Toll/interleukin-1 receptor homology (TIR) domain
AT2G46150	0.33	0.64	0.483333	2.1	1.72667	0.83	1.13667	0.473333	1.22	10.68	0.0025779	1	0.00550176	PF03168 Late embryogenesis abundant protein	IPR004864 Late embryogenesis abundant protein, LEA-14
AT5G42990	26.96	31.76	13.28	14.7667	27.58	34.7633	17.9133	19.4	24.4933	43.0833	0.00258435	1	1	PF00179 Ubiquitin-conjugating enzyme / PF00179 Ubiquitin-conjugating enzyme	IPR000608 Ubiquitin-conjugating enzyme, E2 / IPR023313 Ubiquitin-conjugating enzyme, active site / IPR016135 Ubiquitin-conjugating enzyme/RWD-like
AT3G62422	14.6633	24.91	4.69667	8.10667	6.01667	11.95	6.81333	11.7567	9.88333	11.3167	0.00259034	0.27243	1
AT3G24900	0.793333	3.48333	2.12333	3.58	0.176667	0.166667	0	0	0.07	0.153333	0.0025956	1	1	PF00560 Leucine Rich Repeat 17-38 40-61 / PF00560 Leucine Rich Repeat 17-38 40-61 / PF00560 Leucine Rich Repeat 17-38 40-61 / PF00560 Leucine Rich Repeat 17-38 40-61 / PF00560 Leucine Rich Repeat 17-38 40-61 / PF00560 Leucine Rich Repeat 17-38 40-61 / PF00560 Leucine Rich Repeat 17-38 40-61 / PF13855 Leucine rich repeat / PF13855 Leucine rich repeat	IPR001611 Leucine-rich repeat
AT5G28626	3.83	3.1	10.7	9.76667	18.0867	13.4933	8.61	8.76667	6.53	11.17	0.00259795	1	1
AT4G10690	0.736667	0.786667	0	0.0233333	0.5	0.923333	0.59	0.98	0.55	0.76	0.00261621	1	1
AT5G52370	17.5	17.5967	16.11	20.4833	17.2333	19.6167	4.54333	6.95	21.5767	32.0967	0.00262967	1	1
AT1G52080	1.38667	2.87333	0.773333	2.26333	1.02333	2.94333	1.42333	2.67333	2.17333	7.80667	0.00268467	0.000140522	1
AT5G40060	4.09667	5.81	4.00333	4.67333	4.15333	4.23333	0.143333	0.0533333	4.40333	6.39	0.00269831	1	1	PF07725 Leucine Rich Repeat / PF07725 Leucine Rich Repeat / PF00931 NB-ARC domain	IPR011713 Leucine-rich repeat 3 / IPR002182 NB-ARC / IPR000767 Disease resistance protein / IPR003593 AAA+ ATPase domain / IPR027417 P-loop containing nucleoside triphosphate hydrolase
AT3G51610	20.9667	23.6867	19.6	35.3067	21.5267	34.22	13.9033	16.4567	21.06	51.9133	0.00270918	0.000222156	0.271641
AT5G06660	16.08	13.8267	18.9267	20.3067	13.3	13.97	9.11667	11.6567	17.9567	23.47	0.00271002	1	1	PF01956 Integral membrane protein DUF106	IPR002809 Protein of unknown function DUF106, transmembrane / IPR008559 Uncharacterised conserved protein UCP023322, transmembrane eukaryotic
AT4G27230	35.9367	24.63	10.7733	9.19333	9.80333	9.74333	28.3767	26.89	8.48	12.5867	0.00271046	1	1	PF00125 Core histone H2A/H2B/H3/H4	IPR007125 Histone core / IPR002119 Histone H2A / IPR009072 Histone-fold
AT5G05800	9.77667	12.1433	10.29	14.6467	10.9033	14.7033	12.9333	16.6533	15.5233	20.3367	0.00271436	0.00236419	1	PF12776 Myb/SANT-like DNA-binding domain / PF12776 Myb/SANT-like DNA-binding domain	IPR024752 Myb/SANT-like domain
AT3G22590	7.59333	11.9533	10.3867	11.5567	12.1367	11.0667	12.58	11.4367	13.9867	20.7267	0.00271731	1	1	PF05179 RNA pol II accessory factor, Cdc73 family	IPR007852 RNA polymerase II accessory factor, Cdc73
AT3G48990	155.417	111.14	137.917	79.4233	177.893	126.563	259.117	131.487	77.02	55.2967	0.00272127	0.0141802	1	PF00501 AMP-binding enzyme / PF00501 AMP-binding enzyme / PF13193 AMP-binding enzyme C-terminal domain / PF13193 AMP-binding enzyme C-terminal domain	IPR000873 AMP-dependent synthetase/ligase / IPR025110 Domain of unknown function DUF4009 / IPR020845 AMP-binding, conserved site
AT5G48620	20.5433	39.5533	16.81	24.1733	30.2733	31.0033	8.01	7.62667	13.7867	14.6033	0.00272477	1	1	PF00931 NB-ARC domain	IPR002182 NB-ARC / IPR027417 P-loop containing nucleoside triphosphate hydrolase / IPR000767 Disease resistance protein
AT2G14720	27.3267	50.5033	27.8333	50.6567	57.4633	69.1467	35.8167	39.6667	36.2433	78.88	0.002739	0.000109737	1	PF02225 PA domain / PF12662 Complement Clr-like EGF-like	IPR003137 Protease-associated domain, PA / IPR001881 EGF-like calcium-binding / IPR026823 Complement Clr-like EGF domain / IPR013032 EGF-like, conserved site / IPR018097 EGF-like calcium-binding, conserved site
AT2G12190	1.42667	2.39	0.39	0.836667	0.513333	1.24	4.18333	3.43667	5.31	5.73333	0.00274387	1	1	PF00067 Cytochrome P450	IPR001128 Cytochrome P450 / IPR002401 Cytochrome P450, E-class, group I / IPR017972 Cytochrome P450, conserved site
AT5G03435	0.0433333	0.676667	0.26	1.53667	0.683333	1.38	0.04	0.0333333	0.123333	0.08	0.00274694	0.0740388	1	PF00168 C2 domain / PF00168 C2 domain / PF00168 C2 domain / PF08372 Plant phosphoribosyltransferase C-terminal	IPR000008 C2 calcium-dependent membrane targeting / IPR013583 Phosphoribosyltransferase C-terminal / IPR008973 C2 calcium/lipid-binding domain, CaLB / IPR018029 C2 membrane targeting protein
AT5G43620	4.94667	8.15	0.183333	0.123333	0.18	0.263333	0.256667	0.08	0.18	0.143333	0.00274741	1	1		IPR007087 Zinc finger, C2H2
AT4G36470	2.50333	2.10667	1.26	0.543333	3.6	2.28667	0.983333	0.96	6.49667	7.79333	0.00275237	1	1	PF03492 SAM dependent carboxyl methyltransferase	IPR005299 SAM dependent carboxyl methyltransferase
AT3G21465	6.38333	6.65	7.96667	10.82	8.81333	11.74	8.47	6.27	10.07	14.0033	0.00275508	1	1
AT2G38025	25.4033	19.0867	16.08	9.30333	20.56	11.4333	31.4233	26.9533	19.7433	11.0533	0.00275545	0.14337	1	PF02338 OTU-like cysteine protease	IPR003323 Ovarian tumour, otubain
AT1G66100	396.9	245.203	4.03333	0.17	0.623333	0.303333	0.206667	0.473333	198.76	4.70667	0.00279293	1	1	PF00321 Plant thionin	IPR001010 Thionin
AT5G38010	0.613333	1.32667	0.48	6.33333	0.493333	3.28667	0.296667	0.413333	0.616667	14.1233	0.00282327	0.000243315	0.00428489	PF00201 UDP-glucoronosyl and UDP-glucosyl transferase	IPR002213 UDP-glucuronosyl/UDP-glucosyltransferase
AT1G78270	5.98333	6.97	0.323333	1.20667	8.12667	14.86	11.6633	15.9433	4.95	10.18	0.0028292	1	1	PF00201 UDP-glucoronosyl and UDP-glucosyl transferase	IPR002213 UDP-glucuronosyl/UDP-glucosyltransferase
AT4G14870	61.2033	38.98	14.72	10.6767	20.6033	15.07	16.9033	19.6567	20.1367	10.7267	0.00285431	1	1	PF00584 SecE/Sec61-gamma subunits of protein translocation complex	IPR001901 Protein translocase complex, SecE/Sec61-gamma subunit / IPR005807 SecE subunit of protein translocation complex
AT4G00170	10.6767	13.2333	13.4767	15.28	14.6767	14.7	14.24	12.17	13.0167	21.9667	0.00285756	0.108435	0.00263547	PF00635 MSP (Major sperm protein) domain	IPR000535 Major sperm protein / IPR008962 PapD-like / IPR016763 Vesicle-associated membrane protein
AT1G13448	2.67	7.94333	4.40667	18.8933	2.76333	6.92	1.23333	6.53333	1.60667	2.39333	0.00285788	0.000232551	0.65835
AT4G18580	5.92333	9.81667	2.76667	4.95333	1.35667	3.73333	3.63	3.72	3.48667	12.8667	0.0028748	0.00397627	1
AT4G24760	8.31	8.37333	8.91	8.77	5.97333	7.61333	8.71	9.32333	9.35	16.3433	0.00289338	1	1	PF12695 Alpha/beta hydrolase family
AT2G24165	0.633333	0.52	0	0	1.84667	1.81	5.63	1.07667	6.79333	11.11	0.00294026	1	1
AT2G35240	22.03	17.4867	19.9533	17.2433	22.71	18.7967	23.56	15.3367	27.7733	38.31	0.00296048	1	1
AT4G08093	0.0233333	0	0.223333	0.576667	2.70667	2.56	2.19	2.68333	1.72333	5.43667	0.00297409	1	1
AT3G20090	1.01333	1.02	0.676667	1.26	1.35333	2.38667	0.786667	1.78	1.72667	3.25	0.0029784	0.0120812	1	PF00067 Cytochrome P450	IPR001128 Cytochrome P450 / IPR017972 Cytochrome P450, conserved site / IPR002401 Cytochrome P450, E-class, group I
AT3G28200	29.5433	21.88	34.4567	18.79	31.6333	41.54	31.5133	31.9167	16.9167	13.4067	0.00299324	1	1	PF00141 Peroxidase 66-392	IPR002016 Haem peroxidase, plant/fungal/bacterial / IPR000823 Plant peroxidase / IPR019793 Peroxidases heam-ligand binding site / IPR019794 Peroxidase, active site / IPR010255 Haem peroxidase
AT5G39940	4.54667	5.43	4.97	5	6.34667	5.49	7.92333	8.00667	7.92333	11.42	0.00301049	1	1	PF03486 HI0933-like protein	IPR004792 Conserved hypothetical protein CHP00275, flavoprotein HI0933-like / IPR013027 FAD-dependent pyridine nucleotide-disulphide oxidoreductase
AT3G07510	7.51667	6.68333	9.62667	7.06	16.0067	11.05	11.4133	8.90333	6.41	5.71667	0.00303197	1	1
AT5G26210	26.0967	26.7267	8.57333	12.6367	8.00667	11.08	11.8967	13.0267	11.5333	16.1433	0.00305002	1	1	PF00628 PHD-finger / PF12165 Domain of unknown function (DUF3594)	IPR019787 Zinc finger, PHD-finger / IPR021998 Protein of unknown function DUF3594 / IPR013083 Zinc finger, RING/FYVE/PHD-type / IPR019786 Zinc finger, PHD-type, conserved site / IPR011011 Zinc finger, FYVE/PHD-type / IPR001965 Zinc finger, PHD-type
AT3G47580	2.10667	1.36333	0.0633333	0.0266667	0.02	0	0.136667	0	0.03	0.0733333	0.00306071	1	1	PF00069 Protein kinase domain / PF00560 Leucine Rich Repeat 17-38 40-61 / PF00560 Leucine Rich Repeat 17-38 40-61 / PF00560 Leucine Rich Repeat 17-38 40-61 / PF08263 Leucine rich repeat N-terminal domain / PF13516 Leucine Rich repeat	IPR000719 Protein kinase, catalytic domain / IPR013210 Leucine-rich repeat-containing N-terminal, type 2 / IPR001611 Leucine-rich repeat / IPR017441 Protein kinase, ATP binding site / IPR008271 Serine/threonine-protein kinase, active site / IPR013320 Concanavalin A-like lectin/glucanase, subgroup / IPR003591 Leucine-rich repeat, typical subtype / IPR002290 Serine/threonine- / dual specificity pro…
AT1G58150	2.13333	0.703333	0	0	0	0	0	0	0	0	0.00307559	1	1
AT5G66400	16.1433	157.62	27.64	793.203	25.1533	2053.14	12.68	253.53	14.0367	22.5167	0.00307702	0.000923652	0.00375183	PF00257 Dehydrin	IPR000167 Dehydrin
AT4G11790	14.1933	15.0567	9.88667	14.71	11.5967	12.7667	23.3	21.82	16.1633	19.0733	0.00307781	1	1	PF00638 RanBP1 domain	IPR000156 Ran binding domain / IPR011993 Pleckstrin homology-like domain
AT5G44880	0	0	0	0	1.78667	3.43	0	0.0733333	0	0	0.00308878	1	1
AT1G52280	21.77	27.09	12.79	12.6233	14.7933	12.29	14.82	19.3167	22.1467	22.5667	0.00312563	1	1	PF00071 Ras family	IPR001806 Small GTPase superfamily / IPR027417 P-loop containing nucleoside triphosphate hydrolase / IPR020849 Small GTPase superfamily, Ras type / IPR003579 Small GTPase superfamily, Rab type / IPR003578 Small GTPase superfamily, Rho type / IPR002041 Ran GTPase / IPR005225 Small GTP-binding protein domain
AT1G32740	2.44	1.70333	2.57667	2.49667	1.58333	2.51333	3.75	2.87333	7.10667	4.00667	0.0031269	1	1	PF13920 Zinc finger, C3HC4 type (RING finger)	IPR001841 Zinc finger, RING-type / IPR017066 S-ribonuclease binding protein, SBP1, pollen / IPR013083 Zinc finger, RING/FYVE/PHD-type
AT2G47630	9.65333	7.11	13.1	10.78	9.89333	7.37333	7.01	7.24667	14.1633	24.3567	0.00313373	1	1	PF12146 Putative lysophospholipase / PF12695 Alpha/beta hydrolase family	IPR022742 Alpha/beta hydrolase, N-terminal
AT5G44582	6.33	5.29667	3.42667	2.64333	3.71333	3.04667	0.986667	0.633333	1.61	2.56667	0.00313941	1	1
AT1G55420	0.03	0.16	0.106667	0.266667	0.41	0.653333	0.54	0.496667	0.76	1.15667	0.00314966	1	1	PF03107 C1 domain / PF03107 C1 domain / PF03107 C1 domain / PF07649 C1-like domain / PF07649 C1-like domain / PF07649 C1-like domain	IPR004146 DC1 / IPR011424 C1-like
AT3G03970	1.83667	1.88333	2.06	1.94667	0.946667	0.643333	3.50333	2.65667	2.26	2.26333	0.00315131	1	1		IPR016024 Armadillo-type fold / IPR011989 Armadillo-like helical / IPR007022 Survival motor neuron interacting protein 1
AT5G57880	1.50667	2.01	0.453333	0.72	0.69	0.396667	1.51	2.34333	0.463333	1.03333	0.00316191	1	1
AT5G46500	2.92667	3.77333	0.503333	1.08333	0.506667	0.706667	0.67	0.633333	0.663333	1.47	0.00318333	1	1
AT3G45050	30.7233	23.2267	13.1533	11.7067	37.53	20.7867	13.0433	10.4933	34.2567	32.92	0.00321944	1	1
AT2G22920	0.0666667	1.18333	0.153333	0.78	0.146667	0.876667	0	0.316667	0.36	3.22333	0.00322776	6.02741e-05	0.0985797	PF00450 Serine carboxypeptidase	IPR001563 Peptidase S10, serine carboxypeptidase
AT2G40010	3.50667	1.77333	2.93	1.63667	0.0333333	0.126667	3.34333	1.68667	0.126667	0.0733333	0.00325009	1	1	PF00428 60s Acidic ribosomal protein / PF00466 Ribosomal protein L10	IPR001813 Ribosomal protein L10/L12 / IPR001790 Ribosomal protein L10/acidic P0
AT4G30470	20.1233	22.58	22.1433	35.3367	11.9867	25.2467	19.2133	29.9033	53.0033	98.4867	0.00326594	1	1	PF01370 NAD dependent epimerase/dehydratase family	IPR001509 NAD-dependent epimerase/dehydratase / IPR016040 NAD(P)-binding domain
AT1G63880	19.1433	29.3567	0.233333	0.0466667	3.92333	3.83667	4.29333	3	0.04	0.09	0.00328186	1	1	PF07725 Leucine Rich Repeat / PF00931 NB-ARC domain / PF01582 TIR domain / PF00560 Leucine Rich Repeat 17-38 40-61	IPR011713 Leucine-rich repeat 3 / IPR002182 NB-ARC / IPR000157 Toll/interleukin-1 receptor homology (TIR) domain / IPR001611 Leucine-rich repeat / IPR027417 P-loop containing nucleoside triphosphate hydrolase / IPR000767 Disease resistance protein / IPR003593 AAA+ ATPase domain
AT1G67750	8.36	8.98333	11.2767	10.0033	7.59667	7.51667	6.50667	6.36333	15.02	23.7967	0.00328645	1	1	PF00544 Pectate lyase	IPR002022 Pectate lyase/Amb allergen / IPR012334 Pectin lyase fold / IPR011050 Pectin lyase fold/virulence factor / IPR018082 AmbAllergen
AT1G31940	22.4	20.2667	8.95333	12.6933	9.37667	10.6033	16.81	16.7833	11.78	19.3633	0.00329302	1	1
AT4G36515	9.23333	15.55	7.96	8.06333	4.64667	5.31333	11.0467	13.73	4.13667	6.88	0.00330171	1	1
AT3G53100	14.9767	14.45	11.6867	11.2467	6.55667	9.14	6.09	9.15	8.43667	4.29667	0.0033477	1	1	PF00657 GDSL-like Lipase/Acylhydrolase	IPR001087 Lipase, GDSL / IPR013831 SGNH hydrolase-type esterase domain
AT1G30250	1.72	34.0767	1.43667	20.2867	8.25667	20.6233	5.17	51.4	12.8133	64.02	0.00334884	1.62055e-08	0.29685
AT4G19540	5.81	4.55	5.73	5.43667	6.70667	7.74333	5.85333	3.54667	9.56333	8.8	0.00334971	1	1	PF10609 ParA/MinD ATPase like / PF13614 AAA domain	IPR019591 ATPase-like, ParA/MinD / IPR025669 AAA domain / IPR027417 P-loop containing nucleoside triphosphate hydrolase
AT5G43850	159.95	173.217	36.5067	55.2967	11.3733	50.0433	40.0633	69.8567	274.827	637.897	0.0033974	1	1	PF03079 ARD/ARD' family	IPR004313 Acireductone dioxygenase ARD family / IPR011051 RmlC-like cupin domain / IPR014710 RmlC-like jelly roll fold / IPR027496 1,2-dihydroxy-3-keto-5-methylthiopentene dioxygenase, eukaryotes
AT5G24170	5.77333	5.14667	0.206667	0.1	6.12	6.95	5.38333	7.74333	6.15667	10.23	0.00339741	1	1	PF04178 Got1-like family	IPR007305 Vesicle transport protein, Got1/SFT2-like / IPR011691 Vesicle transport protein, SFT2-like
AT5G66670	0.02	0	0.0233333	0.256667	0.0666667	0.0233333	0.0766667	0.153333	0.13	1.05333	0.00339992	0.424912	0.0450642	PF05055 Protein of unknown function (DUF677)	IPR007749 Protein of unknown function DUF677
AT1G56170	18.6733	14.91	14.87	22.0933	8.74667	17.1133	13.0233	16.3567	28.1933	65.5933	0.00343425	1	1	PF00808 Histone-like transcription factor (CBF/NF-Y) and archaeal histone	IPR003958 Transcription factor CBF/NF-Y/archaeal histone / IPR027170 Transcriptional activator NFYC/HAP5 subunit / IPR009072 Histone-fold
AT2G05840	57.82	73.8633	25.6033	45.7833	25.7633	40.15	46.88	66.2167	30.4367	82.8533	0.00344858	0.000170764	1	PF10584 Proteasome subunit A N-terminal signature / PF00227 Proteasome A-type and B-type	IPR000426 Proteasome, alpha-subunit, N-terminal domain / IPR001353 Proteasome, subunit alpha/beta / IPR023332 Proteasome A-type subunit
AT5G27670	30.97	37.3567	29.38	40.7333	35.8133	44.18	17.1	32.1033	16.4433	25.2967	0.00345174	0.0170082	1	PF00125 Core histone H2A/H2B/H3/H4	IPR007125 Histone core / IPR009072 Histone-fold / IPR002119 Histone H2A
AT3G27280	11.8	7.23667	8.82333	7.11333	13.74	9.08	22.19	9.87667	9.01333	15.5167	0.00346499	0.124353	0.000658767	PF01145 SPFH domain / Band 7 family	IPR001107 Band 7 protein / IPR000163 Prohibitin
AT4G37210	10.32	11.45	9.52	9.1	10.8533	12.0867	10.0867	10.4433	13.0133	19.16	0.00347956	1	1	PF13414 TPR repeat	IPR011990 Tetratricopeptide-like helical / IPR019734 Tetratricopeptide repeat / IPR013026 Tetratricopeptide repeat-containing domain
AT5G54610	40.05	60.9433	48.69	91.03	22.84	50.31	80.7033	29.52	137.74	203.453	0.00352884	1	1	PF12796 Ankyrin repeats (3 copies) / PF13637 Ankyrin repeats (many copies) / PF13962 Domain of unknown function	IPR020683 Ankyrin repeat-containing domain / IPR026961 PGG domain / IPR002110 Ankyrin repeat
AT2G31840	20.25	19.18	21.6867	16.6233	25.29	17.1033	13.2533	11.08	26.99	27.79	0.00353726	1	1		IPR012336 Thioredoxin-like fold
AT1G17920	0.743333	1.27667	0.883333	2.77	1.47	2.94333	0.56	0.853333	1.36	3.26333	0.00353758	0.000182473	1	PF00046 Homeobox domain / PF01852 START domain	IPR001356 Homeodomain / IPR002913 START domain / IPR017970 Homeobox, conserved site / IPR009057 Homeodomain-like / IPR023393 START-like domain
AT5G19473	0.0566667	0	0.07	0.21	0	0.133333	0	0	0.123333	2.31	0.00356429	1	0.0136416	PF05627 Cleavage site for pathogenic type III effector avirulence factor Avr	IPR008700 Pathogenic type III effector avirulence factor Avr cleavage site
AT4G19440	1.38	1.85	1.63333	1.61	0.513333	0.4	0.7	0.353333	1.40667	2.35	0.00357759	1	1	PF01535 PPR repeat 10-34 52-76 94-118 / PF12854 PPR repeat / PF12854 PPR repeat / PF12854 PPR repeat / PF13041 PPR repeat family / PF13041 PPR repeat family / PF13041 PPR repeat family / PF13041 PPR repeat family / PF13041 PPR repeat family	IPR002885 Pentatricopeptide repeat / IPR011990 Tetratricopeptide-like helical
AT3G61860	24.9033	29.8033	26.8933	42.9733	30.2833	36.4633	29.3567	29.7533	32.9267	71.4433	0.0035783	0.00670319	0.174153	PF00076 RNA recognition motif. (a.k.a. RRM, RBD, or RNP domain) / PF00076 RNA recognition motif. (a.k.a. RRM, RBD, or RNP domain)	IPR000504 RNA recognition motif domain / IPR012677 Nucleotide-binding, alpha-beta plait
AT5G60340	54.9133	44.1367	25.15	24.3967	27.2733	25.03	52.9433	57.4933	62.8133	88.75	0.00357967	1	1	PF13238 AAA domain	IPR027417 P-loop containing nucleoside triphosphate hydrolase
AT1G32310	10.3533	11.1167	3.44667	4.63	4.46	3.89	4.91333	3.85667	4.60333	6.07667	0.00358586	1	1
AT2G18917	1.16667	2.80667	3.02333	2.74333	2.31	2.09667	0.0433333	0	0.08	0.116667	0.00359001	1	1
AT5G49990	4.23333	7.95333	4.38333	14.6633	3.97	16.3333	2.14667	4.69	2.83667	10.1233	0.00360691	7.88964e-08	0.236489	PF00860 Permease family	IPR006043 Xanthine/uracil/vitamin C permease
AT5G58530	3.43667	5.61667	5.50667	6.28	6.04667	6.34	2.20667	1.93333	1.66	3.35333	0.0036072	1	1	PF00462 Glutaredoxin	IPR002109 Glutaredoxin / IPR012336 Thioredoxin-like fold
AT1G65250	3.8	8.12667	5.53333	7.04	0.58	0.503333	0.886667	1.07333	1.57333	3.79667	0.00361746	1	1	PF00069 Protein kinase domain	IPR000719 Protein kinase, catalytic domain / IPR011009 Protein kinase-like domain
AT2G17060	0.0333333	0	0.87	0.366667	0.583333	0.77	0.146667	0.04	0.05	0.0933333	0.00363331	1	1	PF07725 Leucine Rich Repeat / PF00931 NB-ARC domain / PF01582 TIR domain / PF00560 Leucine Rich Repeat 17-38 40-61 / PF13855 Leucine rich repeat	IPR011713 Leucine-rich repeat 3 / IPR002182 NB-ARC / IPR000157 Toll/interleukin-1 receptor homology (TIR) domain / IPR001611 Leucine-rich repeat / IPR000767 Disease resistance protein / IPR027417 P-loop containing nucleoside triphosphate hydrolase
AT3G51980	10.3433	15.4033	6.80333	13.2233	7.30667	9.84667	11.0367	11.3033	11.14	19.9667	0.00364184	0.000152376	1	PF08609 Nucleotide exchange factor Fes1	IPR013918 Nucleotide exchange factor Fes1 / IPR016024 Armadillo-type fold / IPR011989 Armadillo-like helical
[truncated: 18,039 more rows]

## Sheet: Table S2B
Supplementary Table S2B. Transcript levels of genes encoding CWPs identified by LC-MS/MS in rosettes (see Table S2A)
Results are expressed as means of RPKMs
	High levels of transcripts.
	Low levels of transcripts.
[truncated: 376 more rows]

## Sheet: Table S2C
Supplementary Table S3A. Transcript levels in floral stems after growth at 22°C or 15°C.
[truncated: 22,573 more rows]

[truncated: 1 more sheets: Table S2D]
