# Supplementary material for: An Integrative Study Showing the Adaptation to Sub-Optimal Growth Conditions of Natural Populations of Arabidopsis thaliana: A Focus on Cell Wall Changes
Source: Cells. 2020 Oct 7;9(10):2249. doi: 10.3390/cells9102249 (PMC7601860; doi:10.3390/cells9102249)
Supplement: Supplementary file 1 [file cells-09-02249-s001.zip › Duruflé et al._Supplementary Table S3.xlsx]

## Sheet: Information
Supplementary Table S3. Statistical results of the sparse MB-PLS-DA of rosettes
Supplementary Table S3A. CWPs or transcripts differentially present in rosettes at a given growth temperature according to the sparse MB-PLS-DA with the 5 ecotypes.
Supplementary Table S3B. CWPs or transcripts differentially present in rosettes of a given ecotype according to the sparse MB-PLS-DA with the 5 ecotypes.
Supplementary Table S3C. CWPs or transcripts differentially present in rosettes of a given altitudinal group according to the sparse MB-PLS-DA with the 5 ecotypes.
Supplementary Table S3D. CWPs or transcripts differentially present in rosettes of a given genetic cluster according to the sparse MB-PLS-DA with the 5 ecotypes.

## Sheet: Table S3A
Supplementary Table S3A. CWPs or transcripts differentially present in rosettes at a given growth temperature according to the sparse MB-PLS-DA with the 5 ecotypes.
Type	AGI code	Functional classes	Protein families	(Putative) functions
Protein	AT1G16850	Unknown function	0	expressed protein
Protein	AT1G21250	Signaling	0	receptor kinase (AtWAK1, WALL-ASSOICATED KINASE 1)
Protein	AT1G29050	Proteins acting on cell wall polysaccharides	GDSL family	homologous to A. thaliana PMR5 (Powdery Mildew Resistant) (carbohydrate acylation)
Protein	AT1G31710	Oxido-reductases	0	copper amine oxidase
Protein	AT1G33590	Proteins with interaction domains (with proteins or polysaccharides)	LRR protein	expressed protein (LRR domains)
Protein	AT1G41830	Oxido-reductases	multicopper oxidase	multicopper oxidase (AtSKS6, homologous to SKU5)
Protein	AT1G53070	Proteins with interaction domains (with proteins or polysaccharides)	lectin	lectin (legume lectin domain)
Protein	AT1G54010	Proteins related to lipid metabolism	GDSL family	lipase acylhydrolase (GDSL family)
Protein	AT1G54030	Proteins related to lipid metabolism	GDSL family	lipase acylhydrolase (GDSL family)
Protein	AT1G58270	Unknown function	0	expressed protein (MATH domain)
Protein	AT1G77480	Proteases	Asp protease	Asp protease (pepsin family) (Peptidase family A01.A26, MEROPS)
Protein	AT2G23000	Proteases	Ser carboxypeptidase	Ser carboxypeptidase (AtSCPL10) (Peptidase family S10.A13, MEROPS)
Protein	AT2G35780	Proteases	Ser carboxypeptidase	Ser carboxypeptidase (AtSCPL26) (Peptidase family S10.A43, MEROPS)
Protein	AT2G43550	Miscellaneous	0	expressed protein (scorpion toxin-like domain, defensin)
Protein	AT2G45180	Proteins related to lipid metabolism	lipid transfer protein (LTP)	homologous to non-specific lipid transfer protein
Protein	AT2G45470	Signaling	fasciclin-like arabinogalactan protein (FLA)	fasciclin-like arabinogalactan protein (FLA8)
Protein	AT3G10450	Proteases	Ser carboxypeptidase	Ser carboxypeptidase (AtSCPL7) (Peptidase family S10.A15, MEROPS)
Protein	AT3G10740	Proteins acting on cell wall polysaccharides	glycoside hydrolase (GH)	glycoside hydrolase family 51 - GH51 (alpha-arabinofuranosidase)
Protein	AT3G12610	Proteins with interaction domains (with proteins or polysaccharides)	LRR protein	expressed protein (LRR domains)
Protein	AT3G14210	Proteins related to lipid metabolism	GDSL family	lipase acylhydrolase (GDSL family)
Protein	AT3G17790	Miscellaneous	purple acid phosphatase (PAP)	purple acid phosphatase (AtPAP17)
Protein	AT3G18050	Unknown function	0	expressed protein
Protein	AT3G18490	Proteases	Asp protease	Asp protease (pepsin family) (Peptidase family A01.A09, MEROPS) (ASPG1, ASPARTIC PROTEASE IN GUARD CELL 1)
Protein	AT3G21770	Oxido-reductases	class III peroxidases	peroxidase (AtPrx30) (ATP7a)
Protein	AT3G26380	Proteins acting on cell wall polysaccharides	glycoside hydrolase (GH)	glycoside hydrolase family 27 - GH27 (alpha-galactosidase/melibiase)
Protein	AT3G47800	Miscellaneous	0	aldose-1-epimerase
Protein	AT3G49120	Oxido-reductases	class III peroxidases	peroxidase (AtPrx34)
Protein	AT3G53980	Proteins related to lipid metabolism	lipid transfer protein (LTP)	non-specific lipid transfer protein (AtLTPd7)
Protein	AT3G55260	Proteins acting on cell wall polysaccharides	glycoside hydrolase (GH)	glycoside hydrolase family 20 - GH20 (N-acetyl-beta-glucosaminidase)
Protein	AT3G62820	Proteins with interaction domains (with proteins or polysaccharides)	0	plant invertase/ pectin methylesterase inhibitor (PMEI)
Protein	AT4G25260	Proteins with interaction domains (with proteins or polysaccharides)	pectin methyl esterase inhibitor (PMEI)	plant invertase/pectin methylesterase inhibitor (PMEI) (AtPMEI7)
Protein	AT4G26690	Proteins related to lipid metabolism	0	glycerophosphoryl diester phosphodiesterase (GDPDL3, GDPL2) (MRH5/SHV3, MORPHOGENESIS OF ROOT HAIR 5)
Protein	AT4G37800	Proteins acting on cell wall polysaccharides	glycoside hydrolase (GH)	glycoside hydrolase family 16 - GH16 (endoxyloglucan transferase) (At-XTH7)
Protein	AT5G12950	Unknown function	0	expressed protein (DUF1680)
Protein	AT5G15350	Oxido-reductases	blue copper binding protein	early nodulin AtEN22 homologous to blue copper binding protein
Protein	AT5G19100	Proteases	Asp protease	Asp protease (pepsin family) (Peptidase family A1, subfamily A1B, non peptidase homologues, MEROPS) (homologous to carrot EDGP and tomato XEGIP)
Protein	AT5G40020	Miscellaneous	thaumatin	thaumatin (PR5)
Protein	AT5G59310	Proteins related to lipid metabolism	lipid transfer protein (LTP)	non-specific lipid transfer protein (AtLTP1.11, AtLTP4)
Protein	AT5G59320	Proteins related to lipid metabolism	lipid transfer protein (LTP)	non-specific lipid transfer protein (AtLTP1.2, AtLTP3)
Protein	AT5G60950	Signaling	COBRA-like	COBRA-like (AtCOBL5)
Transcript	AT1G07080	Oxido-reductases	0	thiol reductase (GILT family)
Transcript	AT1G20225	Oxido-reductases	0	expressed protein (thioredoxin fold)
Transcript	AT1G24450	Miscellaneous	0	ribonuclease III
Transcript	AT1G33811	Proteins related to lipid metabolism	GDSL family	lipase acylhydrolase (GDSL family)
Transcript	AT1G58270	Unknown function	0	expressed protein (MATH domain)
Transcript	AT2G03980	Proteins related to lipid metabolism	GDSL family	lipase acylhydrolase (GDSL family)
Transcript	AT2G16430	Miscellaneous	purple acid phosphatase (PAP)	purple acid phosphatase (AtPAP10)
Transcript	AT2G27190	Miscellaneous	purple acid phosphatase (PAP)	purple acid phosphatase (AtPAP12)
Transcript	AT2G27920	Proteases	Ser carboxypeptidase	Ser carboxypeptidase (AtSCPL51) (Peptidase family S10.017, MEROPS)
Transcript	AT2G37640	Proteins acting on cell wall polysaccharides	expansin	alpha-expansin (ATHEXP ALPHA 1.9) (AtEXPA3)
Transcript	AT3G02110	Proteases	Ser carboxypeptidase	Ser carboxypeptidase (AtSCPL25) (Peptidase family S10.A40, MEROPS)
Transcript	AT3G05910	Proteins acting on cell wall polysaccharides	carbohydrate esterase (CE)	carbohydrate esterase family 13 - CE13 (pectin acylesterase - PAE) (AtPAE12)
Transcript	AT3G10410	Proteases	Ser carboxypeptidase	Ser carboxypeptidase (AtSCPL49) (Peptidase family S10.A45, MEROPS)
Transcript	AT3G14210	Proteins related to lipid metabolism	GDSL family	lipase acylhydrolase (GDSL family)
Transcript	AT3G22060	Unknown function	0	expressed protein (Gnk2-homologous domain, antifungal protein of Ginkgo seeds)
Transcript	AT3G26380	Proteins acting on cell wall polysaccharides	glycoside hydrolase (GH)	glycoside hydrolase family 27 - GH27 (alpha-galactosidase/melibiase)
Transcript	AT3G28220	Unknown function	0	expressed protein (MATH domain)
Transcript	AT3G32980	Oxido-reductases	class III peroxidases	peroxidase (AtPrx32) (ATP16A)
Transcript	AT3G49110	Oxido-reductases	class III peroxidases	peroxidase (AtPrx33)
Transcript	AT3G52720	Miscellaneous	0	carbonic anhydrase
Transcript	AT3G52840	Proteins acting on cell wall polysaccharides	glycoside hydrolase (GH)	glycoside hydrolase family 35 - GH35 (beta-galactosidase) (AtBGAL2)
Transcript	AT3G55260	Proteins acting on cell wall polysaccharides	glycoside hydrolase (GH)	glycoside hydrolase family 20 - GH20 (N-acetyl-beta-glucosaminidase)
Transcript	AT4G01700	Proteins acting on cell wall polysaccharides	glycoside hydrolase (GH)	glycoside hydrolase family 19 - GH19
Transcript	AT4G21620	Unknown function	0	expressed protein
Transcript	AT4G21960	Oxido-reductases	class III peroxidases	peroxidase (AtPrx42)
Transcript	AT4G30810	Proteases	Ser carboxypeptidase	Ser carboxypeptidase (AtSCPL29) (Peptidase family S10.A32, MEROPS)
Transcript	AT4G34980	Proteases	Ser protease	Ser protease (subtilisin) (AtSBT1.6) (Peptidase family S08.A39, MEROPS)
Transcript	AT4G36195	Proteases	peptidase family S28	Pro-Xaa carboxypeptidase (Peptidase family S28.A26, MEROPS)
Transcript	AT4G38770	Structural proteins	proline-rich protein (PRP)	proline-rich protein (AtPRP4)
Transcript	AT5G03350	Proteins with interaction domains (with proteins or polysaccharides)	lectin	lectin (legume lectin domain)
Transcript	AT5G05480	Proteins acting on cell wall polysaccharides	PNGase A	Peptide-N4-(N-acetyl-beta-glucosaminyl) asparagine amidase A
Transcript	AT5G07830	Proteins acting on cell wall polysaccharides	glycoside hydrolase (GH)	glycoside hydrolase family 79 - GH79 (endo-beta-glucuronidase/heparanase)
Transcript	AT5G08370	Proteins acting on cell wall polysaccharides	glycoside hydrolase (GH)	glycoside hydrolase family 27 - GH27 (alpha-galactosidase/melibiase)
Transcript	AT5G08380	Proteins acting on cell wall polysaccharides	glycoside hydrolase (GH)	glycoside hydrolase family 27 - GH27 (alpha-galactosidase/melibiase)
Transcript	AT5G14450	Proteins related to lipid metabolism	GDSL family	lipase acylhydrolase (GDSL family)
Transcript	AT5G39570	Unknown function	0	expressed protein
Transcript	AT5G55450	Proteins related to lipid metabolism	lipid transfer protein (LTP)	non-specific lipid transfer protein (AtLTPd4)
Transcript	AT5G58090	Proteins acting on cell wall polysaccharides	glycoside hydrolase (GH)	glycoside hydrolase family 17 - GH17 (beta-1,3-glucosidase)
Transcript	AT5G60360	Proteases	Cys protease	Cys protease (papain family) (Peptidase family C01.163 MEROPS)
Transcript	AT5G65760	Proteases	peptidase family S28	Pro-Xaa carboxypeptidase (Peptidase family S28.A02, MEROPS)

## Sheet: Table S3B
Supplementary Table S3B. CWPs or transcripts differentially present in rosettes of a given ecotype according to the sparse MB-PLS-DA with the 5 ecotypes.
Type	AGI code	Functional classes	Protein families	(Putative) functions
Protein	AT1G01900	Proteases	Ser protease	Ser protease (subtilisin) (AtSBT1.1) (Peptidase family S08.112, MEROPS)
Protein	AT1G14210	Miscellaneous	0	ribonuclease T2
Protein	AT1G24450	Miscellaneous	0	ribonuclease III
Protein	AT1G55210	Miscellaneous	dirigent protein	dirigent protein (AtDIR20)
Protein	AT1G55260	Proteins related to lipid metabolism	lipid transfer protein (LTP)	non-specific lipid-transfer protein (AtLTPg6)
Protein	AT1G66970	Proteins related to lipid metabolism	0	glycerophosphoryl diester phosphodiesterase (GDPDL1, GDPL3)
Protein	AT1G74000	Miscellaneous	0	strictosidine synthase
Protein	AT1G78450	Unknown function	0	expressed protein (SOUL heme-binding domain)
Protein	AT1G78680	Proteases	peptidase C26	peptidase C26 (peptidase family C26.003, MEROPS)(GGH2)
Protein	AT1G78820	Proteins with interaction domains (with proteins or polysaccharides)	lectin	lectin (curculin-like)
Protein	AT1G78850	Proteins with interaction domains (with proteins or polysaccharides)	lectin	lectin (curculin-like)
Protein	AT2G05920	Proteases	Ser protease	Ser protease (subtilisin) (AtSBT1.8, AF70) (Peptidase family S08.A24, MEROPS)
Protein	AT2G14610	Miscellaneous	0	pathogenesis-related protein (PR) 1 / Cys-rich secretory protein (SCP)
Protein	AT2G18660	Proteins acting on cell wall polysaccharides	expansin	homologous to expansin (EXR3)
Protein	AT2G47010	Unknown function	0	expressed protein
Protein	AT3G02740	Proteases	Asp protease	Asp protease (pepsin family) (Peptidase family A01.A23, MEROPS)
Protein	AT3G04720	Proteins with interaction domains (with proteins or polysaccharides)	0	expressed protein (Barwin domain, defense protein)
Protein	AT3G05730	Unknown function	0	expressed protein
Protein	AT3G10450	Proteases	Ser carboxypeptidase	Ser carboxypeptidase (AtSCPL7) (Peptidase family S10.A15, MEROPS)
Protein	AT3G16850	Proteins acting on cell wall polysaccharides	glycoside hydrolase (GH)	glycoside hydrolase family 28 - GH28 (polygalacturonase)
Protein	AT3G19620	Proteins acting on cell wall polysaccharides	glycoside hydrolase (GH)	glycoside hydrolase family 3 - GH3 (beta-xylosidase) (AtBXL5)
Protein	AT3G21770	Oxido-reductases	class III peroxidases	peroxidase (AtPrx30) (ATP7a)
Protein	AT3G28220	Unknown function	0	expressed protein (MATH domain)
Protein	AT3G52500	Proteases	Asp protease	Asp protease (pepsin family) (Peptidase family A01.A47, MEROPS)
Protein	AT4G08950	Miscellaneous	0	phosphate-induced (phi) protein 1
Protein	AT4G22010	Oxido-reductases	multicopper oxidase	multicopper oxidase (AtSKS4, homologous to SKU5)
Protein	AT4G23820	Proteins acting on cell wall polysaccharides	glycoside hydrolase (GH)	glycoside hydrolase family 28 - GH28 (polygalacturonase)
Protein	AT4G24350	Miscellaneous	0	phosphorylase
Protein	AT4G32460	Unknown function	0	expressed protein (DUF642)
Protein	AT5G08370	Proteins acting on cell wall polysaccharides	glycoside hydrolase (GH)	glycoside hydrolase family 27 - GH27 (alpha-galactosidase/melibiase)
Protein	AT5G09760	Proteins acting on cell wall polysaccharides	carbohydrate esterase (CE)	carbohydrate esterase family 8 - CE8 (pectin methylesterase - PME) (AtPME51)
Protein	AT5G14450	Proteins related to lipid metabolism	GDSL family	lipase acylhydrolase (GDSL family)
Protein	AT5G19100	Proteases	Asp protease	Asp protease (pepsin family) (Peptidase family A1, subfamily A1B, non peptidase homologues, MEROPS) (homologous to carrot EDGP and tomato XEGIP)
Protein	AT5G38940	Miscellaneous	0	germin (subfamily 1 member 11)
Protein	AT5G38980	Unknown function	0	expressed protein
Protein	AT5G48540	Unknown function	0	expressed protein (Gnk2-homologous domain, antifungal protein of Ginkgo seeds)
Protein	AT5G49360	Proteins acting on cell wall polysaccharides	glycoside hydrolase (GH)	glycoside hydrolase family 3 - GH3 (beta xylosidase 1) (AtBXL1)
Protein	AT5G63800	Proteins acting on cell wall polysaccharides	glycoside hydrolase (GH)	glycoside hydrolase family 35 - GH35 (beta-galactosidase) (AtBGAL6)
Protein	AT5G64110	Oxido-reductases	class III peroxidases	peroxidase (AtPrx70)
Transcript	AT1G14210	Miscellaneous	0	ribonuclease T2
Transcript	AT1G26820	Miscellaneous	0	ribonuclease T2
Transcript	AT1G49740	Proteins related to lipid metabolism	0	expressed protein (phospholipase C, phosphatidylinositol-specific, X domain)
Transcript	AT1G61900	Unknown function	0	expressed protein
Transcript	AT1G66970	Proteins related to lipid metabolism	0	glycerophosphoryl diester phosphodiesterase (GDPDL1, GDPL3)
Transcript	AT1G67750	Proteins acting on cell wall polysaccharides	polysaccharide lyase (PL)	polysaccharide lyase family 1 - PL1 (pectate lyase) (AtPLL16)
Transcript	AT1G71695	Oxido-reductases	class III peroxidases	peroxidase (AtPrx12)
Transcript	AT1G78060	Proteins acting on cell wall polysaccharides	glycoside hydrolase (GH)	glycoside hydrolase family 3 - GH3 (beta-xylosidase) (AtBXL7)
Transcript	AT1G78450	Unknown function	0	expressed protein (SOUL heme-binding domain)
Transcript	AT1G78860	Proteins with interaction domains (with proteins or polysaccharides)	lectin	lectin (curculin-like)
Transcript	AT2G02130	Miscellaneous	0	Low-molecular-weight Cysteine-Rich protein 68 (LCR68)/Defensin-like protein 1
Transcript	AT2G04160	Proteases	Ser protease	Ser protease (subtilisin) (AtSBT5.3, AIR3) (Peptidase family S08.119, MEROPS)
Transcript	AT2G27920	Proteases	Ser carboxypeptidase	Ser carboxypeptidase (AtSCPL51) (Peptidase family S10.017, MEROPS)
Transcript	AT2G34810	Oxido-reductases	berberine-bridge oxido-reductase	berberine-bridge enzyme (S)-reticulin:oxygen oxido-reductase
Transcript	AT2G44290	Proteins related to lipid metabolism	lipid transfer protein (LTP)	non-specific lipid-transfer protein (AtLTPg13)
Transcript	AT2G47010	Unknown function	0	expressed protein
Transcript	AT3G05730	Unknown function	0	expressed protein
Transcript	AT3G08770	Proteins related to lipid metabolism	lipid transfer protein (LTP)	non-specific lipid transfer protein (AtLTP1.6, AtLTP6)
Transcript	AT3G10450	Proteases	Ser carboxypeptidase	Ser carboxypeptidase (AtSCPL7) (Peptidase family S10.A15, MEROPS)
Transcript	AT3G14920	Proteins acting on cell wall polysaccharides	PNGase A	Peptide-N4-(N-acetyl-beta-glucosaminyl) asparagine amidase A
Transcript	AT3G20570	Oxido-reductases	blue copper binding protein	early nodulin AtEN14 homologous to blue copper binding protein
Transcript	AT3G32980	Oxido-reductases	class III peroxidases	peroxidase (AtPrx32) (ATP16A)
Transcript	AT3G45940	Proteins acting on cell wall polysaccharides	glycoside hydrolase (GH)	glycoside hydrolase family 31 - GH31 (alpha-glucosidase)
Transcript	AT3G49110	Oxido-reductases	class III peroxidases	peroxidase (AtPrx33)
Transcript	AT3G61820	Proteases	Asp protease	Asp protease (pepsin family) (Peptidase family A01.A13, MEROPS)
Transcript	AT4G01700	Proteins acting on cell wall polysaccharides	glycoside hydrolase (GH)	glycoside hydrolase family 19 - GH19
Transcript	AT4G12390	Proteins with interaction domains (with proteins or polysaccharides)	pectin methyl esterase inhibitor (PMEI)	plant invertase/pectin methylesterase inhibitor (PMEI-like)
Transcript	AT4G21650	Proteases	Ser protease	Ser protease (subtilisin) (AtSBT3.13) (Peptidase family S08.A48, MEROPS)
Transcript	AT4G28100	Unknown function	0	expressed protein
Transcript	AT4G29240	Proteins with interaction domains (with proteins or polysaccharides)	LRR protein	expressed protein (LRR domains)
Transcript	AT4G34180	Unknown function	0	expressed protein (cyclase domain)
Transcript	AT4G38770	Structural proteins	proline-rich protein (PRP)	proline-rich protein (AtPRP4)
Transcript	AT5G03610	Proteins related to lipid metabolism	GDSL family	lipase acylhydrolase (GDSL family)
Transcript	AT5G12950	Unknown function	0	expressed protein (DUF1680)
Transcript	AT5G38980	Unknown function	0	expressed protein
Transcript	AT5G40020	Miscellaneous	thaumatin	thaumatin (PR5)
Transcript	AT5G45280	Proteins acting on cell wall polysaccharides	carbohydrate esterase (CE)	carbohydrate esterase family 13 - CE13 (pectin acylesterase - PAE) (AtPAE11)
Transcript	AT5G48900	Proteins acting on cell wall polysaccharides	polysaccharide lyase (PL)	polysaccharide lyase family 1 - PL1 (pectate lyase) (AtPLL21)

## Sheet: Table S3C
Supplementary Table S3C. CWPs or transcripts differentially present in rosettes of a given altitudinal group according to the sparse MB-PLS-DA with the 5 ecotypes.
Type	AGI code	Functional classes	Protein families	(Putative) functions
Protein	AT1G02360	Proteins acting on cell wall polysaccharides	glycoside hydrolase (GH)	glycoside hydrolase family 19 - GH19
Protein	AT1G03230	Proteases	Asp protease	Asp protease (pepsin family) (Peptidase family A1, subfamily A1B, non-peptidase homologues, MEROPS) (homologous to carrot EDGP and tomato XEGIP)
Protein	AT1G12570	Oxido-reductases	0	expressed protein (GMC oxido-reductase domain)
Protein	AT1G14210	Miscellaneous	0	ribonuclease T2
Protein	AT1G21670	Unknown function	0	expressed protein (WD40-like beta propeller domain)
Protein	AT1G24450	Miscellaneous	0	ribonuclease III
Protein	AT1G28600	Proteins related to lipid metabolism	GDSL family	lipase acylhydrolase (GDSL family)
Protein	AT1G31710	Oxido-reductases	0	copper amine oxidase
Protein	AT1G49740	Proteins related to lipid metabolism	0	expressed protein (phospholipase C, phosphatidylinositol-specific, X domain)
Protein	AT1G52400	Proteins acting on cell wall polysaccharides	glycoside hydrolase (GH)	glycoside hydrolase family 1 - GH1 (beta-glucosidase)(AtBG1) (AtBGLU18)
Protein	AT1G52410	Unknown function	0	expressed protein
Protein	AT1G53830	Proteins acting on cell wall polysaccharides	carbohydrate esterase (CE)	carbohydrate esterase family 8 - CE8 (pectin methylesterase - PME) (AtPME2)
Protein	AT1G54030	Proteins related to lipid metabolism	GDSL family	lipase acylhydrolase (GDSL family)
Protein	AT1G55210	Miscellaneous	dirigent protein	dirigent protein (AtDIR20)
Protein	AT1G58270	Unknown function	0	expressed protein (MATH domain)
Protein	AT1G65590	Proteins acting on cell wall polysaccharides	glycoside hydrolase (GH)	glycoside hydrolase family 20 - GH20 (N-acetyl-beta-glucosaminidase)
Protein	AT1G74000	Miscellaneous	0	strictosidine synthase
Protein	AT2G05920	Proteases	Ser protease	Ser protease (subtilisin) (AtSBT1.8, AF70) (Peptidase family S08.A24, MEROPS)
Protein	AT2G17120	Proteins with interaction domains (with proteins or polysaccharides)	0	expressed protein (LysM domain)
Protein	AT2G35780	Proteases	Ser carboxypeptidase	Ser carboxypeptidase (AtSCPL26) (Peptidase family S10.A43, MEROPS)
Protein	AT2G39850	Proteases	Ser protease	Ser protease (subtilisin) (AtSBT4.1) (Peptidase family S08.A46, MEROPS)
Protein	AT2G43590	Proteins acting on cell wall polysaccharides	glycoside hydrolase (GH)	glycoside hydrolase family 19 - GH19
Protein	AT2G47010	Unknown function	0	expressed protein
Protein	AT3G05730	Unknown function	0	expressed protein
Protein	AT3G10450	Proteases	Ser carboxypeptidase	Ser carboxypeptidase (AtSCPL7) (Peptidase family S10.A15, MEROPS)
Protein	AT3G14210	Proteins related to lipid metabolism	GDSL family	lipase acylhydrolase (GDSL family)
Protein	AT3G16530	Proteins with interaction domains (with proteins or polysaccharides)	lectin	lectin (legume lectin domain)
Protein	AT3G17840	Signaling	LRR-RLK	leucine-rich repeat receptor protein kinase
Protein	AT3G21770	Oxido-reductases	class III peroxidases	peroxidase (AtPrx30) (ATP7a)
Protein	AT3G25700	Proteases	Asp protease	Asp protease (pepsin family) (Peptidase family A01.A11, MEROPS)
Protein	AT3G52500	Proteases	Asp protease	Asp protease (pepsin family) (Peptidase family A01.A47, MEROPS)
Protein	AT4G08950	Miscellaneous	0	phosphate-induced (phi) protein 1
Protein	AT4G19410	Proteins acting on cell wall polysaccharides	carbohydrate esterase (CE)	carbohydrate esterase family 13 - CE13 (pectin acylesterase - PAE) (AtPAE7)
Protein	AT4G21620	Unknown function	0	expressed protein
Protein	AT4G24350	Miscellaneous	0	phosphorylase
Protein	AT4G38770	Structural proteins	proline-rich protein (PRP)	proline-rich protein (AtPRP4)
Protein	AT5G09760	Proteins acting on cell wall polysaccharides	carbohydrate esterase (CE)	carbohydrate esterase family 8 - CE8 (pectin methylesterase - PME) (AtPME51)
Protein	AT5G19100	Proteases	Asp protease	Asp protease (pepsin family) (Peptidase family A1, subfamily A1B, non peptidase homologues, MEROPS) (homologous to carrot EDGP and tomato XEGIP)
Protein	AT5G64570	Proteins acting on cell wall polysaccharides	glycoside hydrolase (GH)	glycoside hydrolase family 3 - GH3 (beta-xylosidase) (AtBXL4)
Protein	AT5G65730	Proteins acting on cell wall polysaccharides	glycoside hydrolase (GH)	glycoside hydrolase family 16 - GH16 (endoxyloglucan transferase) (At-XTH6)
Transcript	AT1G14210	Miscellaneous	0	ribonuclease T2
Transcript	AT1G20225	Oxido-reductases	0	expressed protein (thioredoxin fold)
Transcript	AT1G26820	Miscellaneous	0	ribonuclease T2
Transcript	AT1G49740	Proteins related to lipid metabolism	0	expressed protein (phospholipase C, phosphatidylinositol-specific, X domain)
Transcript	AT1G53830	Proteins acting on cell wall polysaccharides	carbohydrate esterase (CE)	carbohydrate esterase family 8 - CE8 (pectin methylesterase - PME) (AtPME2)
Transcript	AT1G54030	Proteins related to lipid metabolism	GDSL family	lipase acylhydrolase (GDSL family)
Transcript	AT1G58270	Unknown function	0	expressed protein (MATH domain)
Transcript	AT1G61900	Unknown function	0	expressed protein
Transcript	AT1G65590	Proteins acting on cell wall polysaccharides	glycoside hydrolase (GH)	glycoside hydrolase family 20 - GH20 (N-acetyl-beta-glucosaminidase)
Transcript	AT1G66970	Proteins related to lipid metabolism	0	glycerophosphoryl diester phosphodiesterase (GDPDL1, GDPL3)
Transcript	AT1G78040	Unknown function	0	expressed protein (Ole e1 allergen domain)
Transcript	AT1G78450	Unknown function	0	expressed protein (SOUL heme-binding domain)
Transcript	AT2G02130	Miscellaneous	0	Low-molecular-weight Cysteine-Rich protein 68 (LCR68)/Defensin-like protein 1
Transcript	AT2G03980	Proteins related to lipid metabolism	GDSL family	lipase acylhydrolase (GDSL family)
Transcript	AT2G16430	Miscellaneous	purple acid phosphatase (PAP)	purple acid phosphatase (AtPAP10)
Transcript	AT2G46930	Proteins acting on cell wall polysaccharides	carbohydrate esterase (CE)	carbohydrate esterase family 13 - CE13 (pectin acylesterase - PAE) (AtPAE3)
Transcript	AT2G47010	Unknown function	0	expressed protein
Transcript	AT3G05730	Unknown function	0	expressed protein
Transcript	AT3G10450	Proteases	Ser carboxypeptidase	Ser carboxypeptidase (AtSCPL7) (Peptidase family S10.A15, MEROPS)
Transcript	AT3G14210	Proteins related to lipid metabolism	GDSL family	lipase acylhydrolase (GDSL family)
Transcript	AT3G21770	Oxido-reductases	class III peroxidases	peroxidase (AtPrx30) (ATP7a)
Transcript	AT3G44100	Proteins related to lipid metabolism	0	expressed protein (MD-2-related lipid-recognition (ML) domain)
Transcript	AT3G49110	Oxido-reductases	class III peroxidases	peroxidase (AtPrx33)
Transcript	AT3G62820	Proteins with interaction domains (with proteins or polysaccharides)	0	plant invertase/ pectin methylesterase inhibitor (PMEI)
Transcript	AT4G11290	Oxido-reductases	class III peroxidases	peroxidase (AtPrx39)
Transcript	AT4G23170	Unknown function	0	expressed protein (Gnk2-homologous domain, antifungal protein of Ginkgo seeds)
Transcript	AT4G23500	Proteins acting on cell wall polysaccharides	glycoside hydrolase (GH)	glycoside hydrolase family 28 - GH28 (polygalacturonase)
Transcript	AT4G28100	Unknown function	0	expressed protein
Transcript	AT4G29700	Miscellaneous	0	phosphodiesterase
Transcript	AT4G37530	Oxido-reductases	class III peroxidases	peroxidase (AtPrx51)
Transcript	AT4G38770	Structural proteins	proline-rich protein (PRP)	proline-rich protein (AtPRP4)
Transcript	AT5G03350	Proteins with interaction domains (with proteins or polysaccharides)	lectin	lectin (legume lectin domain)
Transcript	AT5G05480	Proteins acting on cell wall polysaccharides	PNGase A	Peptide-N4-(N-acetyl-beta-glucosaminyl) asparagine amidase A
Transcript	AT5G38980	Unknown function	0	expressed protein
Transcript	AT5G41870	Proteins acting on cell wall polysaccharides	glycoside hydrolase (GH)	glycoside hydrolase family 28 - GH28 (polygalacturonase)
Transcript	AT5G42240	Proteases	Ser carboxypeptidase	Ser carboxypeptidase (AtSCPL42) (Peptidase family S10.A21, MEROPS)
Transcript	AT5G42720	Proteins acting on cell wall polysaccharides	glycoside hydrolase (GH)	glycoside hydrolase family 17 - GH17 (beta-1,3-glucosidase)
Transcript	AT5G43060	Proteases	Cys protease	Cys protease (papain family) (Peptidase family C01.A12) (RD21B)
Transcript	AT5G60360	Proteases	Cys protease	Cys protease (papain family) (Peptidase family C01.163 MEROPS)
Transcript	AT5G63140	Miscellaneous	purple acid phosphatase (PAP)	purple acid phosphatase (AtPAP29)

## Sheet: Table S3D
Supplementary Table S3D. CWPs or transcripts differentially present in rosettes of a given genetic cluster according to the sparse MB-PLS-DA with the 5 ecotypes.
Type	AGI code	Functional classes	Protein families	(Putative) functions
Protein	AT1G03220	Proteases	Asp protease	Asp protease (pepsin family) (Peptidase family A1, subfamily A1B, non-peptidase homologues, MEROPS) (homologous to carrot EDGP and tomato XEGIP)
Protein	AT1G03230	Proteases	Asp protease	Asp protease (pepsin family) (Peptidase family A1, subfamily A1B, non-peptidase homologues, MEROPS) (homologous to carrot EDGP and tomato XEGIP)
Protein	AT1G17860	Proteins with interaction domains (with proteins or polysaccharides)	protease inhibitor	inhibitor family I3 (Kunitz trypsin inibitor family) (subfamily I03.030, MEROPS)
Protein	AT1G31710	Oxido-reductases	0	copper amine oxidase
Protein	AT1G42480	Unknown function	0	expressed protein (DUF3456)
Protein	AT1G52400	Proteins acting on cell wall polysaccharides	glycoside hydrolase (GH)	glycoside hydrolase family 1 - GH1 (beta-glucosidase)(AtBG1) (AtBGLU18)
Protein	AT1G52410	Unknown function	0	expressed protein
Protein	AT1G53830	Proteins acting on cell wall polysaccharides	carbohydrate esterase (CE)	carbohydrate esterase family 8 - CE8 (pectin methylesterase - PME) (AtPME2)
Protein	AT1G54030	Proteins related to lipid metabolism	GDSL family	lipase acylhydrolase (GDSL family)
Protein	AT1G58270	Unknown function	0	expressed protein (MATH domain)
Protein	AT1G78680	Proteases	peptidase C26	peptidase C26 (peptidase family C26.003, MEROPS)(GGH2)
Protein	AT1G78850	Proteins with interaction domains (with proteins or polysaccharides)	lectin	lectin (curculin-like)
Protein	AT2G18660	Proteins acting on cell wall polysaccharides	expansin	homologous to expansin (EXR3)
Protein	AT2G28470	Proteins acting on cell wall polysaccharides	glycoside hydrolase (GH)	glycoside hydrolase family 35 - GH35 (beta-galactosidase) (AtBGAL8)
Protein	AT2G43590	Proteins acting on cell wall polysaccharides	glycoside hydrolase (GH)	glycoside hydrolase family 19 - GH19
Protein	AT2G45220	Proteins acting on cell wall polysaccharides	carbohydrate esterase (CE)	carbohydrate esterase family 8 - CE8 (pectin methylesterase - PME) (AtPME17)
Protein	AT3G04720	Proteins with interaction domains (with proteins or polysaccharides)	0	expressed protein (Barwin domain, defense protein)
Protein	AT3G05180	Proteins related to lipid metabolism	GDSL family	lipase acylhydrolase (GDSL family)
Protein	AT3G10450	Proteases	Ser carboxypeptidase	Ser carboxypeptidase (AtSCPL7) (Peptidase family S10.A15, MEROPS)
Protein	AT3G14210	Proteins related to lipid metabolism	GDSL family	lipase acylhydrolase (GDSL family)
Protein	AT3G14920	Proteins acting on cell wall polysaccharides	PNGase A	Peptide-N4-(N-acetyl-beta-glucosaminyl) asparagine amidase A
Protein	AT3G15356	Proteins with interaction domains (with proteins or polysaccharides)	lectin	lectin (legume lectin domain)
Protein	AT3G16530	Proteins with interaction domains (with proteins or polysaccharides)	lectin	lectin (legume lectin domain)
Protein	AT3G17840	Signaling	LRR-RLK	leucine-rich repeat receptor protein kinase
Protein	AT3G21770	Oxido-reductases	class III peroxidases	peroxidase (AtPrx30) (ATP7a)
Protein	AT3G28220	Unknown function	0	expressed protein (MATH domain)
Protein	AT3G47800	Miscellaneous	0	aldose-1-epimerase
Protein	AT4G23690	Miscellaneous	dirigent protein	dirigent protein (AtDIR6)
Protein	AT4G23820	Proteins acting on cell wall polysaccharides	glycoside hydrolase (GH)	glycoside hydrolase family 28 - GH28 (polygalacturonase)
Protein	AT4G29240	Proteins with interaction domains (with proteins or polysaccharides)	LRR protein	expressed protein (LRR domains)
Protein	AT4G38770	Structural proteins	proline-rich protein (PRP)	proline-rich protein (AtPRP4)
Protein	AT5G03350	Proteins with interaction domains (with proteins or polysaccharides)	lectin	lectin (legume lectin domain)
Protein	AT5G08370	Proteins acting on cell wall polysaccharides	glycoside hydrolase (GH)	glycoside hydrolase family 27 - GH27 (alpha-galactosidase/melibiase)
Protein	AT5G10770	Proteases	Asp protease	Asp protease (pepsin family) (Peptidase family A01.A15, MEROPS)
Protein	AT5G21100	Oxido-reductases	multicopper oxidase	multicopper oxidase
Protein	AT5G26000	Proteins acting on cell wall polysaccharides	glycoside hydrolase (GH)	glycoside hydrolase family 1 - GH1 (thioglucoside hydrolase 1) (TGG1) (AtBGLU38)
Protein	AT5G38940	Miscellaneous	0	germin (subfamily 1 member 11)
Protein	AT5G38980	Unknown function	0	expressed protein
Protein	AT5G48540	Unknown function	0	expressed protein (Gnk2-homologous domain, antifungal protein of Ginkgo seeds)
Protein	AT5G60950	Signaling	COBRA-like	COBRA-like (AtCOBL5)
Transcript	AT1G01300	Proteases	Asp protease	Asp protease (pepsin family) (Peptidase family A01.A05, MEROPS)
Transcript	AT1G15000	Proteases	Ser carboxypeptidase	Ser carboxypeptidase (AtSCPL50) (Peptidase family S10 unassigned peptidases, MEROPS)
Transcript	AT1G17860	Proteins with interaction domains (with proteins or polysaccharides)	protease inhibitor	inhibitor family I3 (Kunitz trypsin inibitor family) (subfamily I03.030, MEROPS)
Transcript	AT1G20225	Oxido-reductases	0	expressed protein (thioredoxin fold)
Transcript	AT1G21670	Unknown function	0	expressed protein (WD40-like beta propeller domain)
Transcript	AT1G31710	Oxido-reductases	0	copper amine oxidase
Transcript	AT1G33610	Proteins with interaction domains (with proteins or polysaccharides)	LRR protein	expressed protein (LRR domains)
Transcript	AT1G58270	Unknown function	0	expressed protein (MATH domain)
Transcript	AT1G65590	Proteins acting on cell wall polysaccharides	glycoside hydrolase (GH)	glycoside hydrolase family 20 - GH20 (N-acetyl-beta-glucosaminidase)
Transcript	AT1G66970	Proteins related to lipid metabolism	0	glycerophosphoryl diester phosphodiesterase (GDPDL1, GDPL3)
Transcript	AT1G78860	Proteins with interaction domains (with proteins or polysaccharides)	lectin	lectin (curculin-like)
Transcript	AT2G03980	Proteins related to lipid metabolism	GDSL family	lipase acylhydrolase (GDSL family)
Transcript	AT2G16430	Miscellaneous	purple acid phosphatase (PAP)	purple acid phosphatase (AtPAP10)
Transcript	AT2G22970	Proteases	Ser carboxypeptidase	Ser carboxypeptidase (SCPL11) (Peptidase family S10.A08, MEROPS)
Transcript	AT2G45180	Proteins related to lipid metabolism	lipid transfer protein (LTP)	homologous to non-specific lipid transfer protein
Transcript	AT3G07320	Proteins acting on cell wall polysaccharides	glycoside hydrolase (GH)	glycoside hydrolase family 17 - GH17 (beta-1,3-glucosidase)
Transcript	AT3G10450	Proteases	Ser carboxypeptidase	Ser carboxypeptidase (AtSCPL7) (Peptidase family S10.A15, MEROPS)
Transcript	AT3G14210	Proteins related to lipid metabolism	GDSL family	lipase acylhydrolase (GDSL family)
Transcript	AT3G20570	Oxido-reductases	blue copper binding protein	early nodulin AtEN14 homologous to blue copper binding protein
Transcript	AT3G21770	Oxido-reductases	class III peroxidases	peroxidase (AtPrx30) (ATP7a)
Transcript	AT3G45940	Proteins acting on cell wall polysaccharides	glycoside hydrolase (GH)	glycoside hydrolase family 31 - GH31 (alpha-glucosidase)
Transcript	AT3G61820	Proteases	Asp protease	Asp protease (pepsin family) (Peptidase family A01.A13, MEROPS)
Transcript	AT4G00230	Proteases	Ser protease	Ser protease (subtilisin) (AtSBT4.14, XSP1, XYLEM SERINE PROTEINASE 1) (Peptidase family S08.A14, MEROPS)
Transcript	AT4G13340	Structural proteins	leucine-rich repeat extensin (LRX)	LRR-extensin (AtLRX3)
Transcript	AT4G19410	Proteins acting on cell wall polysaccharides	carbohydrate esterase (CE)	carbohydrate esterase family 13 - CE13 (pectin acylesterase - PAE) (AtPAE7)
Transcript	AT4G23500	Proteins acting on cell wall polysaccharides	glycoside hydrolase (GH)	glycoside hydrolase family 28 - GH28 (polygalacturonase)
Transcript	AT4G29240	Proteins with interaction domains (with proteins or polysaccharides)	LRR protein	expressed protein (LRR domains)
Transcript	AT4G29700	Miscellaneous	0	phosphodiesterase
Transcript	AT4G37530	Oxido-reductases	class III peroxidases	peroxidase (AtPrx51)
Transcript	AT5G03350	Proteins with interaction domains (with proteins or polysaccharides)	lectin	lectin (legume lectin domain)
Transcript	AT5G03610	Proteins related to lipid metabolism	GDSL family	lipase acylhydrolase (GDSL family)
Transcript	AT5G12940	Proteins with interaction domains (with proteins or polysaccharides)	LRR protein	expressed protein (LRR domains)
Transcript	AT5G21105	Oxido-reductases	multicopper oxidase	multicopper oxidase
Transcript	AT5G25980	Proteins acting on cell wall polysaccharides	glycoside hydrolase (GH)	glycoside hydrolase family 1 - (thioglucoside hydrolase 2) (TGG2) (AtBGLU37)
Transcript	AT5G38980	Unknown function	0	expressed protein
Transcript	AT5G42240	Proteases	Ser carboxypeptidase	Ser carboxypeptidase (AtSCPL42) (Peptidase family S10.A21, MEROPS)
Transcript	AT5G48900	Proteins acting on cell wall polysaccharides	polysaccharide lyase (PL)	polysaccharide lyase family 1 - PL1 (pectate lyase) (AtPLL21)
Transcript	AT5G60360	Proteases	Cys protease	Cys protease (papain family) (Peptidase family C01.163 MEROPS)
Transcript	AT5G62350	Proteins with interaction domains (with proteins or polysaccharides)	pectin methyl esterase inhibitor (PMEI)	plant invertase/pectin methylesterase inhibitor (PMEI-like)
