# Supplementary material for: An Integrative Study Showing the Adaptation to Sub-Optimal Growth Conditions of Natural Populations of Arabidopsis thaliana: A Focus on Cell Wall Changes
Source: Cells. 2020 Oct 7;9(10):2249. doi: 10.3390/cells9102249 (PMC7601860; doi:10.3390/cells9102249)
Supplement: Supplementary file 1 [file cells-09-02249-s001.zip › Duruflé et al._Supplementary Table S4.xlsx]

## Sheet: Information
Supplementary Table S4. Statistical results of the sparse MB-PLS-DA of floral stems
Supplementary Table S4A. CWPs or transcripts differentially present in floral stems at a given growth temperature according to the sparse MB-PLS-DA with the 5 ecotypes.
Supplementary Table S4B. CWPs or transcripts differentially present in floral stems of a given ecotype according to the sparse MB-PLS-DA with the 5 ecotypes.
Supplementary Table S4C. CWPs or transcripts differentially present in floral stems of a given altitudinal group according to the sparse MB-PLS-DA with the 5 ecotypes.
Supplementary Table S4D. CWPs or transcripts differentially present in floral stems of a given genetic cluster according to the sparse MB-PLS-DA with the 5 ecotypes.

## Sheet: Table S4A
Supplementary Table S4A. CWPs or transcripts differentially present in floral stems at a given growth temperature according to the sparse MB-PLS-DA with the 5 ecotypes.
Type	AGI code	Functional classes	Protein families	(Putative) functions
Protein	AT1G10640	Proteins acting on cell wall polysaccharides	glycoside hydrolase (GH)	glycoside hydrolase family 28 - GH28 (polygalacturonase)
Protein	AT1G18250	Miscellaneous	thaumatin	thaumatin (PR5, ATLP1)
Protein	AT1G26560	Proteins acting on cell wall polysaccharides	glycoside hydrolase (GH)	glycoside hydrolase family 1 - GH1 (beta-glucosidase) (AtBGLU40)
Protein	AT1G29670	Proteins related to lipid metabolism	GDSL family	lipase acylhydrolase (GDSL family)
Protein	AT1G31550	Proteins related to lipid metabolism	GDSL family	lipase acylhydrolase (GDSL family)
Protein	AT1G47128	Proteases	Cys protease	Cys protease (papain family) (Peptidase family C01.064) (RD21A)
Protein	AT1G78040	Unknown function	0	expressed protein (Ole e1 allergen domain)
Protein	AT2G06850	Proteins acting on cell wall polysaccharides	glycoside hydrolase (GH)	glycoside hydrolase family 16 - GH16 (endoxyloglucan transferase) (At-XTH4)
Protein	AT2G10940	Proteins related to lipid metabolism	lipid transfer protein (LTP)	homologous to non-specific lipid transfer protein
Protein	AT3G02880	Signaling	LRR-RLK	leucine-rich repeat receptor protein kinase (LRR III subfamily)
Protein	AT3G08030	Unknown function	0	expressed protein (DUF642)
Protein	AT3G10450	Proteases	Ser carboxypeptidase	Ser carboxypeptidase (AtSCPL7) (Peptidase family S10.A15, MEROPS)
Protein	AT3G18080	Proteins acting on cell wall polysaccharides	glycoside hydrolase (GH)	glycoside hydrolase family 1 - GH1 (beta-glucosidase) (AtBGLU44)
Protein	AT3G22060	Unknown function	0	expressed protein (Gnk2-homologous domain, antifungal protein of Ginkgo seeds)
Protein	AT3G61820	Proteases	Asp protease	Asp protease (pepsin family) (Peptidase family A01.A13, MEROPS)
Protein	AT4G01700	Proteins acting on cell wall polysaccharides	glycoside hydrolase (GH)	glycoside hydrolase family 19 - GH19
Protein	AT4G12730	Signaling	fasciclin-like arabinogalactan protein (FLA)	fasciclin-like arabinogalactan protein (FLA2)
Protein	AT4G15210	Proteins acting on cell wall polysaccharides	glycoside hydrolase (GH)	glycoside hydrolase family 14 - GH14
Protein	AT4G19410	Proteins acting on cell wall polysaccharides	carbohydrate esterase (CE)	carbohydrate esterase family 13 - CE13 (pectin acylesterase - PAE) (AtPAE7)
Protein	AT4G21640	Proteases	Ser protease	Ser protease (subtilisin) (AtSBT3.15) (Peptidase family S08.A42, MEROPS)
Protein	AT4G23820	Proteins acting on cell wall polysaccharides	glycoside hydrolase (GH)	glycoside hydrolase family 28 - GH28 (polygalacturonase)
Protein	AT4G28100	Unknown function	0	expressed protein
Protein	AT4G30290	Proteins acting on cell wall polysaccharides	glycoside hydrolase (GH)	glycoside hydrolase family 16 - GH16 (endoxyloglucan transferase) (At-XTH19)
Protein	AT4G31140	Proteins acting on cell wall polysaccharides	glycoside hydrolase (GH)	glycoside hydrolase family 17 - GH17 (beta-1,3-glucosidase)
Protein	AT4G31840	Oxido-reductases	blue copper binding protein	early nodulin AtEN13 homologous to blue copper binding protein
Protein	AT5G04885	Proteins acting on cell wall polysaccharides	glycoside hydrolase (GH)	glycoside hydrolase family 3 - GH3
Protein	AT5G08260	Proteases	Ser carboxypeptidase	Ser carboxypeptidase (AtSCPL35) (Peptidase family, S10.A34, MEROPS)
Protein	AT5G15350	Oxido-reductases	blue copper binding protein	early nodulin AtEN22 homologous to blue copper binding protein
Protein	AT5G19740	Proteases	Peptidase family M28	peptidase M28 (peptidase family M28.A02, MEROPS)
Protein	AT5G21100	Oxido-reductases	multicopper oxidase	multicopper oxidase
Protein	AT5G24780	Miscellaneous	0	acid phosphatase (class B)
Protein	AT5G33370	Proteins related to lipid metabolism	GDSL family	lipase acylhydrolase (GDSL family)
Protein	AT5G47350	Proteins related to lipid metabolism	0	palmitoyl protein thioesterase
Protein	AT5G51950	Oxido-reductases	0	expressed protein (GMC oxido-reductase domain)
Protein	AT5G58090	Proteins acting on cell wall polysaccharides	glycoside hydrolase (GH)	glycoside hydrolase family 17 - GH17 (beta-1,3-glucosidase)
Protein	AT5G62210	Proteins related to lipid metabolism	0	expressed protein (lipase/lipooxygenase domain, PLAT/LH2)
Protein	AT5G62350	Proteins with interaction domains (with proteins or polysaccharides)	pectin methyl esterase inhibitor (PMEI)	plant invertase/pectin methylesterase inhibitor (PMEI-like)
Protein	AT5G64570	Proteins acting on cell wall polysaccharides	glycoside hydrolase (GH)	glycoside hydrolase family 3 - GH3 (beta-xylosidase) (AtBXL4)
Protein	AT5G65760	Proteases	peptidase family S28	Pro-Xaa carboxypeptidase (Peptidase family S28.A02, MEROPS)
Transcript	AT1G05835	Unknown function	0	expressed protein
Transcript	AT1G26560	Proteins acting on cell wall polysaccharides	glycoside hydrolase (GH)	glycoside hydrolase family 1 - GH1 (beta-glucosidase) (AtBGLU40)
Transcript	AT1G26820	Miscellaneous	0	ribonuclease T2
Transcript	AT1G27950	Proteins related to lipid metabolism	lipid transfer protein (LTP)	non-specific lipid transfer protein (AtLTPg4, LTPG1)
Transcript	AT1G28110	Proteases	Ser carboxypeptidase	Ser carboxypeptidase (AtSCPL45) (Peptidase family S10.A24, MEROPS)
Transcript	AT1G31710	Oxido-reductases	0	copper amine oxidase
Transcript	AT1G41830	Oxido-reductases	multicopper oxidase	multicopper oxidase (AtSKS6, homologous to SKU5)
Transcript	AT1G69295	Proteins with interaction domains (with proteins or polysaccharides)	0	expressed protein (X8 domain that may be involved in carbohydrate binding)
Transcript	AT1G69530	Proteins acting on cell wall polysaccharides	expansin	alpha-expansin (ATHEXP ALPHA 1.2) (AtEXPA1)
Transcript	AT1G71695	Oxido-reductases	class III peroxidases	peroxidase (AtPrx12)
Transcript	AT1G78060	Proteins acting on cell wall polysaccharides	glycoside hydrolase (GH)	glycoside hydrolase family 3 - GH3 (beta-xylosidase) (AtBXL7)
Transcript	AT1G80170	Proteins acting on cell wall polysaccharides	glycoside hydrolase (GH)	glycoside hydrolase family 28 - GH28 (polygalacturonase)
Transcript	AT2G04570	Proteins related to lipid metabolism	GDSL family	lipase acylhydrolase (GDSL family)
Transcript	AT2G04780	Signaling	fasciclin-like arabinogalactan protein (FLA)	fasciclin-like arabinogalactan protein (FLA7)
Transcript	AT2G05920	Proteases	Ser protease	Ser protease (subtilisin) (AtSBT1.8, AF70) (Peptidase family S08.A24, MEROPS)
Transcript	AT2G33530	Proteases	Ser carboxypeptidase	Ser carboxypeptidase (AtSCPL46) (Peptidase family, S10.A42, MEROPS)
Transcript	AT2G38540	Proteins related to lipid metabolism	lipid transfer protein (LTP)	non-specific lipid-transfer protein (AtLTP1.5, AtLTP1)
Transcript	AT2G39850	Proteases	Ser protease	Ser protease (subtilisin) (AtSBT4.1) (Peptidase family S08.A46, MEROPS)
Transcript	AT2G46930	Proteins acting on cell wall polysaccharides	carbohydrate esterase (CE)	carbohydrate esterase family 13 - CE13 (pectin acylesterase - PAE) (AtPAE3)
Transcript	AT3G05730	Unknown function	0	expressed protein
Transcript	AT3G06035	Unknown function	0	expressed protein
Transcript	AT3G13990	Oxido-reductases	multicopper oxidase	multicopper oxidase (AtSKS11, homologous to SKU5)
Transcript	AT3G44100	Proteins related to lipid metabolism	0	expressed protein (MD-2-related lipid-recognition (ML) domain)
Transcript	AT4G00230	Proteases	Ser protease	Ser protease (subtilisin) (AtSBT4.14, XSP1, XYLEM SERINE PROTEINASE 1) (Peptidase family S08.A14, MEROPS)
Transcript	AT4G00860	Unknown function	0	expressed protein (DUF1138)
Transcript	AT4G01130	Proteins related to lipid metabolism	GDSL family	lipase acylhydrolase (GDSL family)
Transcript	AT4G12880	Oxido-reductases	blue copper binding protein	early nodulin AtEN20 homologous to blue copper binding protein
Transcript	AT4G21585	Proteins related to lipid metabolism	0	phospholipase C/P1 nuclease
Transcript	AT4G21650	Proteases	Ser protease	Ser protease (subtilisin) (AtSBT3.13) (Peptidase family S08.A48, MEROPS)
Transcript	AT4G24780	Proteins acting on cell wall polysaccharides	polysaccharide lyase (PL)	polysaccharide lyase family 1 - PL1 (pectate lyase) (AtPLL19)
Transcript	AT4G25000	Proteins acting on cell wall polysaccharides	glycoside hydrolase (GH)	glycoside hydrolase family 13 - GH13 (alpha amylase)
Transcript	AT4G28250	Proteins acting on cell wall polysaccharides	expansin	beta-expansin (AtEXPB3)
Transcript	AT4G38400	Proteins acting on cell wall polysaccharides	expansin	expansin-like A (ATHEXP BETA 2.2) (AtEXLA2)
Transcript	AT5G06860	Proteins with interaction domains (with proteins or polysaccharides)	LRR protein	PGIP1 (LRR domains)
Transcript	AT5G20230	Oxido-reductases	blue copper binding protein	stellacyanin AtSTC1, BCB (blue copper binding protein)
Transcript	AT5G21100	Oxido-reductases	multicopper oxidase	multicopper oxidase
Transcript	AT5G45280	Proteins acting on cell wall polysaccharides	carbohydrate esterase (CE)	carbohydrate esterase family 13 - CE13 (pectin acylesterase - PAE) (AtPAE11)
Transcript	AT5G55730	Signaling	fasciclin-like arabinogalactan protein (FLA)	fasciclin-like arabinogalactan protein (FLA1)
Transcript	AT5G62210	Proteins related to lipid metabolism	0	expressed protein (lipase/lipooxygenase domain, PLAT/LH2)
Transcript	AT5G64260	Miscellaneous	0	phosphate-induced (phi) protein 1

## Sheet: Table S4B
Supplementary Table S4B. CWPs or transcripts differentially present in floral stems of a given ecotype according to the sparse MB-PLS-DA with the 5 ecotypes.
Type	AGI code	Functional classes	Protein families	(Putative) functions
Protein	AT1G14210	Miscellaneous	0	ribonuclease T2
Protein	AT1G15000	Proteases	Ser carboxypeptidase	Ser carboxypeptidase (AtSCPL50) (Peptidase family S10 unassigned peptidases, MEROPS)
Protein	AT1G24450	Miscellaneous	0	ribonuclease III
Protein	AT1G27950	Proteins related to lipid metabolism	lipid transfer protein (LTP)	non-specific lipid transfer protein (AtLTPg4, LTPG1)
Protein	AT1G29050	Proteins acting on cell wall polysaccharides	GDSL family	homologous to A. thaliana PMR5 (Powdery Mildew Resistant) (carbohydrate acylation)
Protein	AT1G41830	Oxido-reductases	multicopper oxidase	multicopper oxidase (AtSKS6, homologous to SKU5)
Protein	AT1G47960	Proteins with interaction domains (with proteins or polysaccharides)	pectin methyl esterase inhibitor (PMEI)	plant invertase/pectin methylesterase inhibitor (PMEI) (INH)
Protein	AT1G49740	Proteins related to lipid metabolism	0	expressed protein (phospholipase C, phosphatidylinositol-specific, X domain)
Protein	AT1G54010	Proteins related to lipid metabolism	GDSL family	lipase acylhydrolase (GDSL family)
Protein	AT1G65900	Unknown function	0	expressed protein
Protein	AT1G66970	Proteins related to lipid metabolism	0	glycerophosphoryl diester phosphodiesterase (GDPDL1, GDPL3)
Protein	AT1G70710	Proteins acting on cell wall polysaccharides	glycoside hydrolase (GH)	glycoside hydrolase family 9 - GH9 (endo-1,3(4)-beta-glucanase) (AtCEL1)
Protein	AT2G05920	Proteases	Ser protease	Ser protease (subtilisin) (AtSBT1.8, AF70) (Peptidase family S08.A24, MEROPS)
Protein	AT2G12480	Proteases	Ser carboxypeptidase	Ser carboxypeptidase (AtSCPL43) (Peptidase family S10.A33, MEROPS)
Protein	AT2G16430	Miscellaneous	purple acid phosphatase (PAP)	purple acid phosphatase (AtPAP10)
Protein	AT2G22970	Proteases	Ser carboxypeptidase	Ser carboxypeptidase (SCPL11) (Peptidase family S10.A08, MEROPS)
Protein	AT2G26010	Miscellaneous	0	homologous to gamma thionin (defensin)
Protein	AT2G45220	Proteins acting on cell wall polysaccharides	carbohydrate esterase (CE)	carbohydrate esterase family 8 - CE8 (pectin methylesterase - PME) (AtPME17)
Protein	AT2G47010	Unknown function	0	expressed protein
Protein	AT3G02740	Proteases	Asp protease	Asp protease (pepsin family) (Peptidase family A01.A23, MEROPS)
Protein	AT3G04720	Proteins with interaction domains (with proteins or polysaccharides)	0	expressed protein (Barwin domain, defense protein)
Protein	AT3G15356	Proteins with interaction domains (with proteins or polysaccharides)	lectin	lectin (legume lectin domain)
Protein	AT3G16530	Proteins with interaction domains (with proteins or polysaccharides)	lectin	lectin (legume lectin domain)
Protein	AT3G28200	Oxido-reductases	class III peroxidases	peroxidase (AtPrx31)
Protein	AT3G32980	Oxido-reductases	class III peroxidases	peroxidase (AtPrx32) (ATP16A)
Protein	AT3G52500	Proteases	Asp protease	Asp protease (pepsin family) (Peptidase family A01.A47, MEROPS)
Protein	AT3G55430	Proteins acting on cell wall polysaccharides	glycoside hydrolase (GH)	glycoside hydrolase family 17 - GH17 (beta-1,3-glucosidase)
Protein	AT4G12890	Oxido-reductases	0	thiol reductase (GILT family)
Protein	AT4G16260	Proteins acting on cell wall polysaccharides	glycoside hydrolase (GH)	glycoside hydrolase family 17 - GH17 (beta-1,3-glucosidase)
Protein	AT4G24350	Miscellaneous	0	phosphorylase
Protein	AT4G28250	Proteins acting on cell wall polysaccharides	expansin	beta-expansin (AtEXPB3)
Protein	AT4G31140	Proteins acting on cell wall polysaccharides	glycoside hydrolase (GH)	glycoside hydrolase family 17 - GH17 (beta-1,3-glucosidase)
Protein	AT4G33355	Proteins related to lipid metabolism	lipid transfer protein (LTP)	non-specific lipid transfer protein (AtLTP1.9, AtLTP11)
Protein	AT4G38770	Structural proteins	proline-rich protein (PRP)	proline-rich protein (AtPRP4)
Protein	AT5G03350	Proteins with interaction domains (with proteins or polysaccharides)	lectin	lectin (legume lectin domain)
Protein	AT5G09730	Proteins acting on cell wall polysaccharides	glycoside hydrolase (GH)	glycoside hydrolase family 3 - GH3
Protein	AT5G19240	Unknown function	0	expressed protein
Protein	AT5G25980	Proteins acting on cell wall polysaccharides	glycoside hydrolase (GH)	glycoside hydrolase family 1 - (thioglucoside hydrolase 2) (TGG2) (AtBGLU37)
Protein	AT5G34940	Proteins acting on cell wall polysaccharides	glycoside hydrolase (GH)	glycoside hydrolase family 79 - GH79 (endo-beta-glucuronidase/heparanase)
Protein	AT5G60950	Signaling	COBRA-like	COBRA-like (AtCOBL5)
Transcript	AT1G01300	Proteases	Asp protease	Asp protease (pepsin family) (Peptidase family A01.A05, MEROPS)
Transcript	AT1G04680	Proteins acting on cell wall polysaccharides	polysaccharide lyase (PL)	polysaccharide lyase family 1 - PL1 (pectate lyase) (AtPLL26)
Transcript	AT1G14210	Miscellaneous	0	ribonuclease T2
Transcript	AT1G28110	Proteases	Ser carboxypeptidase	Ser carboxypeptidase (AtSCPL45) (Peptidase family S10.A24, MEROPS)
Transcript	AT1G31550	Proteins related to lipid metabolism	GDSL family	lipase acylhydrolase (GDSL family)
Transcript	AT1G61900	Unknown function	0	expressed protein
Transcript	AT1G70710	Proteins acting on cell wall polysaccharides	glycoside hydrolase (GH)	glycoside hydrolase family 9 - GH9 (endo-1,3(4)-beta-glucanase) (AtCEL1)
Transcript	AT1G74210	Proteins related to lipid metabolism	0	glycerophosphoryl diester phosphodiesterase (GDPD5)
Transcript	AT1G78060	Proteins acting on cell wall polysaccharides	glycoside hydrolase (GH)	glycoside hydrolase family 3 - GH3 (beta-xylosidase) (AtBXL7)
Transcript	AT1G78820	Proteins with interaction domains (with proteins or polysaccharides)	lectin	lectin (curculin-like)
Transcript	AT2G10940	Proteins related to lipid metabolism	lipid transfer protein (LTP)	homologous to non-specific lipid transfer protein
Transcript	AT2G17120	Proteins with interaction domains (with proteins or polysaccharides)	0	expressed protein (LysM domain)
Transcript	AT2G22970	Proteases	Ser carboxypeptidase	Ser carboxypeptidase (SCPL11) (Peptidase family S10.A08, MEROPS)
Transcript	AT2G42800	Proteins with interaction domains (with proteins or polysaccharides)	LRR protein	expressed protein (LRR domains)
Transcript	AT3G02110	Proteases	Ser carboxypeptidase	Ser carboxypeptidase (AtSCPL25) (Peptidase family S10.A40, MEROPS)
Transcript	AT3G02880	Signaling	LRR-RLK	leucine-rich repeat receptor protein kinase (LRR III subfamily)
Transcript	AT3G12700	Proteases	Asp protease	Asp protease (pepsin family) (Peptidase family A01.A30, MEROPS)
Transcript	AT3G44100	Proteins related to lipid metabolism	0	expressed protein (MD-2-related lipid-recognition (ML) domain)
Transcript	AT3G52500	Proteases	Asp protease	Asp protease (pepsin family) (Peptidase family A01.A47, MEROPS)
Transcript	AT3G61820	Proteases	Asp protease	Asp protease (pepsin family) (Peptidase family A01.A13, MEROPS)
Transcript	AT3G62820	Proteins with interaction domains (with proteins or polysaccharides)	0	plant invertase/ pectin methylesterase inhibitor (PMEI)
Transcript	AT4G00230	Proteases	Ser protease	Ser protease (subtilisin) (AtSBT4.14, XSP1, XYLEM SERINE PROTEINASE 1) (Peptidase family S08.A14, MEROPS)
Transcript	AT4G01700	Proteins acting on cell wall polysaccharides	glycoside hydrolase (GH)	glycoside hydrolase family 19 - GH19
Transcript	AT4G02290	Proteins acting on cell wall polysaccharides	glycoside hydrolase (GH)	glycoside hydrolase family 9 - GH9 (endo-1,3(4)-beta-glucanase)
Transcript	AT4G02330	Proteins acting on cell wall polysaccharides	carbohydrate esterase (CE)	carbohydrate esterase family 8 - CE8 (pectin methylesterase - PME) (AtPME41)
Transcript	AT4G23820	Proteins acting on cell wall polysaccharides	glycoside hydrolase (GH)	glycoside hydrolase family 28 - GH28 (polygalacturonase)
Transcript	AT4G33220	Proteins acting on cell wall polysaccharides	carbohydrate esterase (CE)	carbohydrate esterase family 8 - CE8 (pectin methylesterase - PME) (AtPME44)
Transcript	AT4G33355	Proteins related to lipid metabolism	lipid transfer protein (LTP)	non-specific lipid transfer protein (AtLTP1.9, AtLTP11)
Transcript	AT4G34480	Proteins acting on cell wall polysaccharides	glycoside hydrolase (GH)	glycoside hydrolase family 17 - GH17 (beta-1,3-glucosidase)
Transcript	AT4G39640	Miscellaneous	0	gamma glutamyltranpeptidase (GGT2)
Transcript	AT5G03610	Proteins related to lipid metabolism	GDSL family	lipase acylhydrolase (GDSL family)
Transcript	AT5G09760	Proteins acting on cell wall polysaccharides	carbohydrate esterase (CE)	carbohydrate esterase family 8 - CE8 (pectin methylesterase - PME) (AtPME51)
Transcript	AT5G19240	Unknown function	0	expressed protein
Transcript	AT5G19740	Proteases	Peptidase family M28	peptidase M28 (peptidase family M28.A02, MEROPS)
Transcript	AT5G23210	Proteases	Ser carboxypeptidase	Ser carboxypeptidase (AtSCPL34) (Peptidase family S10.A39, MEROPS)
Transcript	AT5G23870	Proteins acting on cell wall polysaccharides	carbohydrate esterase (CE)	carbohydrate esterase family 13 - CE13 (pectin acylesterase - PAE) (AtPAE9)
Transcript	AT5G25980	Proteins acting on cell wall polysaccharides	glycoside hydrolase (GH)	glycoside hydrolase family 1 - (thioglucoside hydrolase 2) (TGG2) (AtBGLU37)
Transcript	AT5G42100	Proteins acting on cell wall polysaccharides	glycoside hydrolase (GH)	glycoside hydrolase family 17 - GH17 (beta-1,3-glucosidase)
Transcript	AT5G48540	Unknown function	0	expressed protein (Gnk2-homologous domain, antifungal protein of Ginkgo seeds)
Transcript	AT5G51750	Proteases	Ser protease	Ser protease (subtilisin) (AtSBT1.3) (Peptidase family S08.A25, MEROPS)

## Sheet: Table S4C
Supplementary Table S4C. CWPs or transcripts differentially present in floral stems of a given altitudinal group according to the sparse MB-PLS-DA with the 5 ecotypes.
Type	AGI code	Functional classes	Protein families	(Putative) functions
Protein	AT1G03230	Proteases	Asp protease	Asp protease (pepsin family) (Peptidase family A1, subfamily A1B, non-peptidase homologues, MEROPS) (homologous to carrot EDGP and tomato XEGIP)
Protein	AT1G12570	Oxido-reductases	0	expressed protein (GMC oxido-reductase domain)
Protein	AT1G14210	Miscellaneous	0	ribonuclease T2
Protein	AT1G20190	Proteins acting on cell wall polysaccharides	expansin	alpha-expansin (ATHEXP ALPHA 1.14) (AtEXPA11)
Protein	AT1G27950	Proteins related to lipid metabolism	lipid transfer protein (LTP)	non-specific lipid transfer protein (AtLTPg4, LTPG1)
Protein	AT1G28610	Unknown function	0	expressed protein (SGNH hydrolase-type esterase domain)
Protein	AT1G31710	Oxido-reductases	0	copper amine oxidase
Protein	AT1G48750	Proteins related to lipid metabolism	lipid transfer protein (LTP)	non-specific lipid-transfer protein (AtLTP2.4)
Protein	AT1G49740	Proteins related to lipid metabolism	0	expressed protein (phospholipase C, phosphatidylinositol-specific, X domain)
Protein	AT1G49750	Proteins with interaction domains (with proteins or polysaccharides)	LRR protein	expressed protein (LRR domains)
Protein	AT1G71040	Oxido-reductases	multicopper oxidase	multicopper oxidase (LPR2, LOW PHOSPHATE ROOT 2)
Protein	AT1G74000	Miscellaneous	0	strictosidine synthase
Protein	AT1G78850	Proteins with interaction domains (with proteins or polysaccharides)	lectin	lectin (curculin-like)
Protein	AT2G12480	Proteases	Ser carboxypeptidase	Ser carboxypeptidase (AtSCPL43) (Peptidase family S10.A33, MEROPS)
Protein	AT2G14610	Miscellaneous	0	pathogenesis-related protein (PR) 1 / Cys-rich secretory protein (SCP)
Protein	AT2G15320	Proteins with interaction domains (with proteins or polysaccharides)	LRR protein	expressed protein (LRR domains)
Protein	AT2G22970	Proteases	Ser carboxypeptidase	Ser carboxypeptidase (SCPL11) (Peptidase family S10.A08, MEROPS)
Protein	AT2G32810	Proteins acting on cell wall polysaccharides	glycoside hydrolase (GH)	glycoside hydrolase family 35 - GH35 (beta-galactosidase) (AtBGAL9)
Protein	AT2G38380	Oxido-reductases	class III peroxidases	peroxidase (AtPrx22) (ATPEA)
Protein	AT2G39850	Proteases	Ser protease	Ser protease (subtilisin) (AtSBT4.1) (Peptidase family S08.A46, MEROPS)
Protein	AT3G02740	Proteases	Asp protease	Asp protease (pepsin family) (Peptidase family A01.A23, MEROPS)
Protein	AT3G07130	Miscellaneous	purple acid phosphatase (PAP)	purple acid phosphatase (AtPAP15)
Protein	AT3G14210	Proteins related to lipid metabolism	GDSL family	lipase acylhydrolase (GDSL family)
Protein	AT3G47800	Miscellaneous	0	aldose-1-epimerase
Protein	AT3G49110	Oxido-reductases	class III peroxidases	peroxidase (AtPrx33)
Protein	AT3G62750	Proteins acting on cell wall polysaccharides	glycoside hydrolase (GH)	glycoside hydrolase family 1 - GH1 (beta-glucosidase) (AtBGLU8)
Protein	AT3G62820	Proteins with interaction domains (with proteins or polysaccharides)	0	plant invertase/ pectin methylesterase inhibitor (PMEI)
Protein	AT4G12870	Oxido-reductases	0	thiol reductase (GILT family)
Protein	AT4G12890	Oxido-reductases	0	thiol reductase (GILT family)
Protein	AT4G24780	Proteins acting on cell wall polysaccharides	polysaccharide lyase (PL)	polysaccharide lyase family 1 - PL1 (pectate lyase) (AtPLL19)
Protein	AT4G34180	Unknown function	0	expressed protein (cyclase domain)
Protein	AT5G05960	Proteins related to lipid metabolism	lipid transfer protein (LTP)	non-specific lipid transfer protein (AtLTPd8)
Protein	AT5G07830	Proteins acting on cell wall polysaccharides	glycoside hydrolase (GH)	glycoside hydrolase family 79 - GH79 (endo-beta-glucuronidase/heparanase)
Protein	AT5G08370	Proteins acting on cell wall polysaccharides	glycoside hydrolase (GH)	glycoside hydrolase family 27 - GH27 (alpha-galactosidase/melibiase)
Protein	AT5G09730	Proteins acting on cell wall polysaccharides	glycoside hydrolase (GH)	glycoside hydrolase family 3 - GH3
Protein	AT5G09760	Proteins acting on cell wall polysaccharides	carbohydrate esterase (CE)	carbohydrate esterase family 8 - CE8 (pectin methylesterase - PME) (AtPME51)
Protein	AT5G42720	Proteins acting on cell wall polysaccharides	glycoside hydrolase (GH)	glycoside hydrolase family 17 - GH17 (beta-1,3-glucosidase)
Protein	AT5G43060	Proteases	Cys protease	Cys protease (papain family) (Peptidase family C01.A12) (RD21B)
Protein	AT5G45280	Proteins acting on cell wall polysaccharides	carbohydrate esterase (CE)	carbohydrate esterase family 13 - CE13 (pectin acylesterase - PAE) (AtPAE11)
Protein	AT5G48540	Unknown function	0	expressed protein (Gnk2-homologous domain, antifungal protein of Ginkgo seeds)
Transcript	AT1G02180	Unknown function	0	expressed protein
Transcript	AT1G02305	Proteases	Cys protease	Cys protease (cathepsin B family) (Peptidase family C01.049, MEROPS)
Transcript	AT1G03230	Proteases	Asp protease	Asp protease (pepsin family) (Peptidase family A1, subfamily A1B, non-peptidase homologues, MEROPS) (homologous to carrot EDGP and tomato XEGIP)
Transcript	AT1G10640	Proteins acting on cell wall polysaccharides	glycoside hydrolase (GH)	glycoside hydrolase family 28 - GH28 (polygalacturonase)
Transcript	AT1G12570	Oxido-reductases	0	expressed protein (GMC oxido-reductase domain)
Transcript	AT1G17860	Proteins with interaction domains (with proteins or polysaccharides)	protease inhibitor	inhibitor family I3 (Kunitz trypsin inibitor family) (subfamily I03.030, MEROPS)
Transcript	AT1G31550	Proteins related to lipid metabolism	GDSL family	lipase acylhydrolase (GDSL family)
Transcript	AT1G31710	Oxido-reductases	0	copper amine oxidase
Transcript	AT1G49740	Proteins related to lipid metabolism	0	expressed protein (phospholipase C, phosphatidylinositol-specific, X domain)
Transcript	AT1G57590	Proteins acting on cell wall polysaccharides	carbohydrate esterase (CE)	carbohydrate esterase family 13 - CE13 (pectin acylesterase - PAE) (AtPAE2)
Transcript	AT1G71040	Oxido-reductases	multicopper oxidase	multicopper oxidase (LPR2, LOW PHOSPHATE ROOT 2)
Transcript	AT1G78450	Unknown function	0	expressed protein (SOUL heme-binding domain)
Transcript	AT2G04690	Unknown function	0	expressed protein (human brain CREG protein domain)
Transcript	AT2G22970	Proteases	Ser carboxypeptidase	Ser carboxypeptidase (SCPL11) (Peptidase family S10.A08, MEROPS)
Transcript	AT2G35780	Proteases	Ser carboxypeptidase	Ser carboxypeptidase (AtSCPL26) (Peptidase family S10.A43, MEROPS)
Transcript	AT2G39780	Miscellaneous	0	ribonuclease T2
Transcript	AT2G43610	Proteins acting on cell wall polysaccharides	glycoside hydrolase (GH)	glycoside hydrolase family 19 - GH19
Transcript	AT2G47010	Unknown function	0	expressed protein
Transcript	AT3G07320	Proteins acting on cell wall polysaccharides	glycoside hydrolase (GH)	glycoside hydrolase family 17 - GH17 (beta-1,3-glucosidase)
Transcript	AT3G10450	Proteases	Ser carboxypeptidase	Ser carboxypeptidase (AtSCPL7) (Peptidase family S10.A15, MEROPS)
Transcript	AT3G14210	Proteins related to lipid metabolism	GDSL family	lipase acylhydrolase (GDSL family)
Transcript	AT3G45010	Proteases	Ser carboxypeptidase	Ser carboxypeptidase (AtSCPL48) (Peptidase family S10.A46, MEROPS)
Transcript	AT3G52500	Proteases	Asp protease	Asp protease (pepsin family) (Peptidase family A01.A47, MEROPS)
Transcript	AT4G20430	Proteases	Ser protease	Ser protease (subtilisin) (AtSBT2.2) (Peptidase family S08.A01, MEROPS)
Transcript	AT4G28100	Unknown function	0	expressed protein
Transcript	AT4G29360	Proteins acting on cell wall polysaccharides	glycoside hydrolase (GH)	glycoside hydrolase family 17 - GH17 (beta-1,3-glucosidase)
Transcript	AT4G38770	Structural proteins	proline-rich protein (PRP)	proline-rich protein (AtPRP4)
Transcript	AT5G03350	Proteins with interaction domains (with proteins or polysaccharides)	lectin	lectin (legume lectin domain)
Transcript	AT5G04885	Proteins acting on cell wall polysaccharides	glycoside hydrolase (GH)	glycoside hydrolase family 3 - GH3
Transcript	AT5G08000	Proteins with interaction domains (with proteins or polysaccharides)	0	expressed protein (X8 domain that may be involved in carbohydrate binding)
Transcript	AT5G13980	Proteins acting on cell wall polysaccharides	glycoside hydrolase (GH)	glycoside hydrolase family 38 - GH38 (alpha-mannosidase)
Transcript	AT5G14920	Miscellaneous	gibberellic acid-stimulated Arabidopsis (GASA) protein	gibberellic acid-stimulated Arabidopsis (AtGASA14) protein
Transcript	AT5G21090	Proteins with interaction domains (with proteins or polysaccharides)	LRR protein	expressed protein (LRR domains)
Transcript	AT5G23210	Proteases	Ser carboxypeptidase	Ser carboxypeptidase (AtSCPL34) (Peptidase family S10.A39, MEROPS)
Transcript	AT5G42100	Proteins acting on cell wall polysaccharides	glycoside hydrolase (GH)	glycoside hydrolase family 17 - GH17 (beta-1,3-glucosidase)
Transcript	AT5G42240	Proteases	Ser carboxypeptidase	Ser carboxypeptidase (AtSCPL42) (Peptidase family S10.A21, MEROPS)
Transcript	AT5G42720	Proteins acting on cell wall polysaccharides	glycoside hydrolase (GH)	glycoside hydrolase family 17 - GH17 (beta-1,3-glucosidase)
Transcript	AT5G43060	Proteases	Cys protease	Cys protease (papain family) (Peptidase family C01.A12) (RD21B)
Transcript	AT5G58090	Proteins acting on cell wall polysaccharides	glycoside hydrolase (GH)	glycoside hydrolase family 17 - GH17 (beta-1,3-glucosidase)

## Sheet: Table S4D
Supplementary Table S4D. CWPs or transcripts differentially present in floral stems of a given genetic cluster according to the sparse MB-PLS-DA with the 5 ecotypes.
Type	AGI code	Functional classes	Protein families	(Putative) functions
Protein	AT1G03230	Proteases	Asp protease	Asp protease (pepsin family) (Peptidase family A1, subfamily A1B, non-peptidase homologues, MEROPS) (homologous to carrot EDGP and tomato XEGIP)
Protein	AT1G17860	Proteins with interaction domains (with proteins or polysaccharides)	protease inhibitor	inhibitor family I3 (Kunitz trypsin inibitor family) (subfamily I03.030, MEROPS)
Protein	AT1G49750	Proteins with interaction domains (with proteins or polysaccharides)	LRR protein	expressed protein (LRR domains)
Protein	AT1G65590	Proteins acting on cell wall polysaccharides	glycoside hydrolase (GH)	glycoside hydrolase family 20 - GH20 (N-acetyl-beta-glucosaminidase)
Protein	AT1G70710	Proteins acting on cell wall polysaccharides	glycoside hydrolase (GH)	glycoside hydrolase family 9 - GH9 (endo-1,3(4)-beta-glucanase) (AtCEL1)
Protein	AT1G72230	Oxido-reductases	blue copper binding protein	uclacyanin AtUCC8 (blue copper binding protein)
Protein	AT2G05920	Proteases	Ser protease	Ser protease (subtilisin) (AtSBT1.8, AF70) (Peptidase family S08.A24, MEROPS)
Protein	AT2G14610	Miscellaneous	0	pathogenesis-related protein (PR) 1 / Cys-rich secretory protein (SCP)
Protein	AT2G18660	Proteins acting on cell wall polysaccharides	expansin	homologous to expansin (EXR3)
Protein	AT2G22970	Proteases	Ser carboxypeptidase	Ser carboxypeptidase (SCPL11) (Peptidase family S10.A08, MEROPS)
Protein	AT2G28470	Proteins acting on cell wall polysaccharides	glycoside hydrolase (GH)	glycoside hydrolase family 35 - GH35 (beta-galactosidase) (AtBGAL8)
Protein	AT2G45220	Proteins acting on cell wall polysaccharides	carbohydrate esterase (CE)	carbohydrate esterase family 8 - CE8 (pectin methylesterase - PME) (AtPME17)
Protein	AT2G46930	Proteins acting on cell wall polysaccharides	carbohydrate esterase (CE)	carbohydrate esterase family 13 - CE13 (pectin acylesterase - PAE) (AtPAE3)
Protein	AT3G04720	Proteins with interaction domains (with proteins or polysaccharides)	0	expressed protein (Barwin domain, defense protein)
Protein	AT3G12145	Proteins with interaction domains (with proteins or polysaccharides)	LRR protein	homologous to PGIP1 (LRR protein FLR1)
Protein	AT3G14210	Proteins related to lipid metabolism	GDSL family	lipase acylhydrolase (GDSL family)
Protein	AT3G15356	Proteins with interaction domains (with proteins or polysaccharides)	lectin	lectin (legume lectin domain)
Protein	AT3G16850	Proteins acting on cell wall polysaccharides	glycoside hydrolase (GH)	glycoside hydrolase family 28 - GH28 (polygalacturonase)
Protein	AT3G19620	Proteins acting on cell wall polysaccharides	glycoside hydrolase (GH)	glycoside hydrolase family 3 - GH3 (beta-xylosidase) (AtBXL5)
Protein	AT3G44100	Proteins related to lipid metabolism	0	expressed protein (MD-2-related lipid-recognition (ML) domain)
Protein	AT3G47800	Miscellaneous	0	aldose-1-epimerase
Protein	AT3G55430	Proteins acting on cell wall polysaccharides	glycoside hydrolase (GH)	glycoside hydrolase family 17 - GH17 (beta-1,3-glucosidase)
Protein	AT3G62750	Proteins acting on cell wall polysaccharides	glycoside hydrolase (GH)	glycoside hydrolase family 1 - GH1 (beta-glucosidase) (AtBGLU8)
Protein	AT4G12870	Oxido-reductases	0	thiol reductase (GILT family)
Protein	AT4G12880	Oxido-reductases	blue copper binding protein	early nodulin AtEN20 homologous to blue copper binding protein
Protein	AT4G13710	Proteins acting on cell wall polysaccharides	polysaccharide lyase (PL)	polysaccharide lyase family 1 - PL1 (pectate lyase) (AtPLL25)
Protein	AT4G21590	Proteins related to lipid metabolism	0	phospholipase C/P1 nuclease
Protein	AT4G28250	Proteins acting on cell wall polysaccharides	expansin	beta-expansin (AtEXPB3)
Protein	AT5G03350	Proteins with interaction domains (with proteins or polysaccharides)	lectin	lectin (legume lectin domain)
Protein	AT5G06870	Proteins with interaction domains (with proteins or polysaccharides)	LRR protein	PGIP2 (LRR domains)
Protein	AT5G07830	Proteins acting on cell wall polysaccharides	glycoside hydrolase (GH)	glycoside hydrolase family 79 - GH79 (endo-beta-glucuronidase/heparanase)
Protein	AT5G08370	Proteins acting on cell wall polysaccharides	glycoside hydrolase (GH)	glycoside hydrolase family 27 - GH27 (alpha-galactosidase/melibiase)
Protein	AT5G12950	Unknown function	0	expressed protein (DUF1680)
Protein	AT5G19110	Proteases	Asp protease	Asp protease (pepsin family) (Peptidase family A1, subfamily A1B, non-peptidase homologues, MEROPS) (homologous to carrot EDGP and tomato XEGIP)
Protein	AT5G19240	Unknown function	0	expressed protein
Protein	AT5G25980	Proteins acting on cell wall polysaccharides	glycoside hydrolase (GH)	glycoside hydrolase family 1 - (thioglucoside hydrolase 2) (TGG2) (AtBGLU37)
Protein	AT5G45280	Proteins acting on cell wall polysaccharides	carbohydrate esterase (CE)	carbohydrate esterase family 13 - CE13 (pectin acylesterase - PAE) (AtPAE11)
Protein	AT5G49180	Proteins acting on cell wall polysaccharides	carbohydrate esterase (CE)	carbohydrate esterase family 8 - CE8 (pectin methylesterase - PME) (AtPME58)
Protein	AT5G60950	Signaling	COBRA-like	COBRA-like (AtCOBL5)
Protein	AT5G63810	Proteins acting on cell wall polysaccharides	glycoside hydrolase (GH)	glycoside hydrolase family 35 - GH35 (beta-galactosidase) (AtBGAL10)
Transcript	AT1G01300	Proteases	Asp protease	Asp protease (pepsin family) (Peptidase family A01.A05, MEROPS)
Transcript	AT1G03230	Proteases	Asp protease	Asp protease (pepsin family) (Peptidase family A1, subfamily A1B, non-peptidase homologues, MEROPS) (homologous to carrot EDGP and tomato XEGIP)
Transcript	AT1G17860	Proteins with interaction domains (with proteins or polysaccharides)	protease inhibitor	inhibitor family I3 (Kunitz trypsin inibitor family) (subfamily I03.030, MEROPS)
Transcript	AT1G28290	Structural proteins	proline-rich protein (PRP)	AGP/proline-rich protein (AtAGP31)
Transcript	AT1G61900	Unknown function	0	expressed protein
Transcript	AT1G65590	Proteins acting on cell wall polysaccharides	glycoside hydrolase (GH)	glycoside hydrolase family 20 - GH20 (N-acetyl-beta-glucosaminidase)
Transcript	AT1G66970	Proteins related to lipid metabolism	0	glycerophosphoryl diester phosphodiesterase (GDPDL1, GDPL3)
Transcript	AT1G74210	Proteins related to lipid metabolism	0	glycerophosphoryl diester phosphodiesterase (GDPD5)
Transcript	AT1G78820	Proteins with interaction domains (with proteins or polysaccharides)	lectin	lectin (curculin-like)
Transcript	AT2G10940	Proteins related to lipid metabolism	lipid transfer protein (LTP)	homologous to non-specific lipid transfer protein
Transcript	AT2G18660	Proteins acting on cell wall polysaccharides	expansin	homologous to expansin (EXR3)
Transcript	AT2G22970	Proteases	Ser carboxypeptidase	Ser carboxypeptidase (SCPL11) (Peptidase family S10.A08, MEROPS)
Transcript	AT2G27920	Proteases	Ser carboxypeptidase	Ser carboxypeptidase (AtSCPL51) (Peptidase family S10.017, MEROPS)
Transcript	AT2G32810	Proteins acting on cell wall polysaccharides	glycoside hydrolase (GH)	glycoside hydrolase family 35 - GH35 (beta-galactosidase) (AtBGAL9)
Transcript	AT3G07130	Miscellaneous	purple acid phosphatase (PAP)	purple acid phosphatase (AtPAP15)
Transcript	AT3G07320	Proteins acting on cell wall polysaccharides	glycoside hydrolase (GH)	glycoside hydrolase family 17 - GH17 (beta-1,3-glucosidase)
Transcript	AT3G07390	Unknown function	0	expressed protein (auxin-responsive protein AIR12) (DUF568)
Transcript	AT3G12145	Proteins with interaction domains (with proteins or polysaccharides)	LRR protein	homologous to PGIP1 (LRR protein FLR1)
Transcript	AT3G14210	Proteins related to lipid metabolism	GDSL family	lipase acylhydrolase (GDSL family)
Transcript	AT3G18080	Proteins acting on cell wall polysaccharides	glycoside hydrolase (GH)	glycoside hydrolase family 1 - GH1 (beta-glucosidase) (AtBGLU44)
Transcript	AT3G28830	Unknown function	0	expressed protein (DUF1216)
Transcript	AT3G45010	Proteases	Ser carboxypeptidase	Ser carboxypeptidase (AtSCPL48) (Peptidase family S10.A46, MEROPS)
Transcript	AT3G47800	Miscellaneous	0	aldose-1-epimerase
Transcript	AT3G57260	Proteins acting on cell wall polysaccharides	glycoside hydrolase (GH)	glycoside hydrolase family 17 - GH17 (beta-1,3-glucosidase) (BG2) (PR2)
Transcript	AT3G59510	Proteins with interaction domains (with proteins or polysaccharides)	LRR protein	expressed protein (LRR domains)
Transcript	AT3G61490	Proteins acting on cell wall polysaccharides	glycoside hydrolase (GH)	glycoside hydrolase family 28 - GH28 (polygalacturonase)
Transcript	AT3G61820	Proteases	Asp protease	Asp protease (pepsin family) (Peptidase family A01.A13, MEROPS)
Transcript	AT3G62750	Proteins acting on cell wall polysaccharides	glycoside hydrolase (GH)	glycoside hydrolase family 1 - GH1 (beta-glucosidase) (AtBGLU8)
Transcript	AT4G01700	Proteins acting on cell wall polysaccharides	glycoside hydrolase (GH)	glycoside hydrolase family 19 - GH19
Transcript	AT4G12900	Oxido-reductases	0	thiol reductase (GILT family)
Transcript	AT4G20430	Proteases	Ser protease	Ser protease (subtilisin) (AtSBT2.2) (Peptidase family S08.A01, MEROPS)
Transcript	AT4G21590	Proteins related to lipid metabolism	0	phospholipase C/P1 nuclease
Transcript	AT4G33220	Proteins acting on cell wall polysaccharides	carbohydrate esterase (CE)	carbohydrate esterase family 8 - CE8 (pectin methylesterase - PME) (AtPME44)
Transcript	AT5G19740	Proteases	Peptidase family M28	peptidase M28 (peptidase family M28.A02, MEROPS)
Transcript	AT5G20740	Proteins with interaction domains (with proteins or polysaccharides)	pectin methyl esterase inhibitor (PMEI)	plant invertase/pectin methylesterase inhibitor (PMEI) (AtPMEI3)
Transcript	AT5G25980	Proteins acting on cell wall polysaccharides	glycoside hydrolase (GH)	glycoside hydrolase family 1 - (thioglucoside hydrolase 2) (TGG2) (AtBGLU37)
Transcript	AT5G26000	Proteins acting on cell wall polysaccharides	glycoside hydrolase (GH)	glycoside hydrolase family 1 - GH1 (thioglucoside hydrolase 1) (TGG1) (AtBGLU38)
Transcript	AT5G33370	Proteins related to lipid metabolism	GDSL family	lipase acylhydrolase (GDSL family)
Transcript	AT5G34940	Proteins acting on cell wall polysaccharides	glycoside hydrolase (GH)	glycoside hydrolase family 79 - GH79 (endo-beta-glucuronidase/heparanase)
Transcript	AT5G47550	Proteins with interaction domains (with proteins or polysaccharides)	protease inhibitor	proteinase inhibitor family I25 (phytostatin) (cystatin family, I25.033, MEROPS) (AtCYS-5)
